# Supplementary material
Source: publisher figshare collection journal article supplement (https://springernature.figshare.com/articles/dataset/_/27166347)
Supplement: Supplementary file 1 [file 1]

## Sheet: Dataset 1
Harmful algal blooms preceded by a predictable and quantifiable shift in the oceanic microbiome
Dataset 1 - Environmental Metadata
Date	Time	DateTime	Cyanobacteria	Picoeuks	Nanoeuks	Intensity....lum.ft2.	Chlorophyll.RFU	Conductivity.uscm	ODO.sat	Sal.psu	pH	Temp.C	PO4	Si.OH.4	NO3	NO2	NH4
2021-05-27	13:00:00	2021-05-27 13:01:00	NA	NA	NA	515	0.93	40042	126.6	33.31	8.43	13.916	0.15	2.31	0.13	0.01	0.06
2021-05-27	17:00:00	2021-05-27 17:01:00	NA	NA	NA	1	1.05	39793.6	120.6	33.38	8.39	13.577	0.22	3.87	0.18	0.02	0.05
2021-05-27	21:00:00	2021-05-27 21:01:00	NA	NA	NA	3	5.41	39698.5	117.3	33.39	8.38	13.458	0.23	3.23	0.15	0.04	0.08
2021-05-28	01:00:00	2021-05-28 01:01:00	NA	NA	NA	0	6.61	39706.7	115.9	33.34	8.39	13.523	0.18	2.24	0.15	0.01	0.1
2021-05-28	05:00:00	2021-05-28 05:00:00	2598.34	2274.33	504.717	1	0.85	39808.2	116.1	33.36	8.41	13.612	0.17	1.95	0.14	0.01	0.1
2021-05-28	09:00:00	2021-05-28 09:01:00	3589.12	2486.21	579.495	271	0.8	39831	112.3	33.34	8.38	13.663	0.2	1.63	0.11	0.01	0.07
2021-05-28	13:00:00	2021-05-28 13:01:00	3290.58	2006.74	564.014	266	1.05	40079.5	116.2	33.36	8.41	13.905	0.17	2.08	0.21	0.01	0.05
2021-05-28	17:00:00	2021-05-28 17:01:00	3898.12	2785.7	679.285	504	0.33	40479.2	115.8	33.37	8.41	14.318	0.18	1.82	0.18	0	0.07
2021-05-28	21:00:00	2021-05-28 21:01:00	2770.35	1918.81	584.107	3	1.05	40442.3	114.8	33.38	8.41	14.271	0.17	2.26	0.19	0.05	0.07
2021-05-29	01:00:00	2021-05-29 01:01:00	2703.51	2489.6	768.008	0	1.21	40281.2	113.5	33.38	8.4	14.098	0.19	2.03	0.17	0.03	0.09
2021-05-29	05:00:00	2021-05-29 05:01:00	3573.37	2264.89	451.734	1	1.07	39985.3	110.4	33.39	8.38	13.769	0.21	2.53	0.2	0.01	0.09
2021-05-29	09:00:00	2021-05-29 09:01:00	5091.46	2685.99	831.973	186	0.32	39907.2	109.6	33.39	8.37	13.679	0.2	2.04	0.13	0.01	0.08
2021-05-29	13:00:00	2021-05-29 13:01:00	3732.5	4215.81	1016.25	391	0.81	39403.7	104.3	33.53	8.26	12.988	1.47	22.52	7.26	0.39	1.85
2021-05-29	17:00:00	2021-05-29 17:01:00	4950.22	2984.77	657.527	262	0.56	39482.6	104.5	33.52	8.23	13.084	0.58	8.74	0.31	0.09	0.11
2021-05-29	21:00:00	2021-05-29 21:01:00	3299.83	3361.97	618.411	6	2.06	37342	76.9	33.73	7.87	10.537	1.7	24.27	11.77	0.47	2.07
2021-05-30	01:00:00	2021-05-30 01:00:00	NA	NA	NA	NA	NA	NA	NA	NA	NA	NA	1.27	17.85	5.67	0.37	1.61
2021-05-30	05:00:00	2021-05-30 05:01:00	5629.11	1723.97	571.167	1	0.95	39470.6	93.7	33.66	8.14	12.914	1.28	17.33	7.01	0.41	1.52
2021-05-30	09:00:00	2021-05-30 09:00:00	NA	NA	NA	NA	NA	NA	NA	NA	NA	NA	0.38	5.91	0.53	0.06	0.1
2021-05-30	13:00:00	2021-05-30 13:01:00	4181.1	1648.4	693.706	630	1.01	38256.9	81.9	33.74	7.94	11.518	1.97	31	11.26	0.51	4.33
2021-05-30	17:00:00	2021-05-30 17:01:00	4670.72	1955.03	504.872	625	0.53	37135.5	61.8	33.89	7.75	10.142	2.12	31.8	15.47	0.49	4.83
2021-05-30	21:00:00	2021-05-30 21:01:00	3638.07	3806.34	638.712	3	1.36	37290.9	68.9	33.82	7.81	10.389	2.18	32.26	13.02	0.49	6.31
2021-05-31	01:00:00	2021-05-31 01:01:00	8771.85	4242.54	451.917	0	0.23	37032.4	59.8	33.88	7.73	10.048	2.18	32.91	16.53	0.49	5.24
2021-05-31	05:00:00	2021-05-31 05:01:00	3748.05	3053.3	591.978	1	NA	NA	NA	NA	NA	NA	2.33	32.94	12.49	0.48	6.97
2021-05-31	09:00:00	2021-05-31 09:01:00	4188.44	2116.04	443.319	265	NA	NA	NA	NA	NA	NA	1.87	27.35	10.38	0.61	4.81
2021-05-31	13:00:00	2021-05-31 13:01:00	10776.3	4866.21	788.781	1	NA	NA	NA	NA	NA	NA	2.19	32.27	13.03	0.49	5.76
2021-05-31	17:00:00	2021-05-31 17:01:00	5901.62	3505.44	763.405	249	0.31	37489.8	66.7	33.85	7.78	10.572	2.22	32.43	13.16	0.5	5.65
2021-05-31	21:00:00	2021-05-31 21:01:00	4895.29	5523.48	984.656	6	0.77	37462.3	84.1	33.83	8.02	10.563	2.17	31.31	13.26	0.52	6.31
2021-06-01	01:00:00	2021-06-01 01:01:00	4056.67	4923.15	1089.52	0	9.22	37392	90.9	33.9	8	10.412	1.28	24.66	9.55	0.49	1.37
2021-06-01	05:00:00	2021-06-01 05:01:00	4620.88	5185.12	1171.97	1	0.88	37200.2	62.4	33.95	7.75	10.146	1.88	29.82	16.49	0.5	3.3
2021-06-01	09:00:00	2021-06-01 09:01:00	4733.17	4094.23	1040.07	492	14.03	37257.5	70.8	33.95	7.82	10.213	1.52	27.37	14.23	0.5	1.15
2021-06-01	13:00:00	2021-06-01 13:01:00	9301.98	7246.88	1971.49	363	1.17	37257.9	68.9	33.99	7.81	10.17	1.65	27.69	14.95	0.48	1.81
2021-06-01	17:00:00	2021-06-01 17:01:00	13860.1	9555.07	2601.04	196	0.37	37440.8	81.3	34.02	7.92	10.335	1.66	28.54	13.97	0.57	1.93
2021-06-01	21:00:00	2021-06-01 21:01:00	4729.71	3696.41	966.903	4	9.79	37686.3	94.2	33.97	8.02	10.65	1.32	25.16	10.59	0.56	1.05
2021-06-02	01:00:00	2021-06-02 01:01:00	14915.5	7035.14	1524.1	0	10.09	37742.9	102.2	33.97	8.06	10.719	1.07	22.25	7.41	0.46	0.67
2021-06-02	05:00:00	2021-06-02 05:01:00	6592.05	2952.54	552.051	1	7.59	37563.7	79.8	34.01	7.89	10.478	1.4	24.88	13.69	0.47	1.19
2021-06-02	09:00:00	2021-06-02 09:01:00	5115.43	3127.41	1157.27	851	3.9	38952.3	109.5	33.85	8.09	12.144	0.83	19.1	1.71	0.16	0.14
2021-06-02	13:00:00	2021-06-02 13:00:00	NA	NA	NA	969	6.57	39900.8	134.3	33.83	8.25	13.18	0.49	12.88	0.15	0.04	0.08
2021-06-02	17:00:00	2021-06-02 17:01:00	6795.07	7096.54	1644.12	480	14.72	40290	147.6	33.83	8.31	13.593	0.37	6.23	0.09	0.04	0.17
2021-06-02	21:00:00	2021-06-02 21:01:00	5615.06	6748.85	909.608	5	8.9	40167	146.7	33.83	8.32	13.466	0.49	5.35	0.22	0.13	0.2
2021-06-03	01:00:00	2021-06-03 01:01:00	5986.89	8570.63	944.232	0	9.81	39867.4	138.8	33.84	8.27	13.125	0.36	2.21	0.15	0.06	0.13
2021-06-03	05:00:00	2021-06-03 05:00:00	10830.8	11593.4	1834.55	1	5.8	40030.2	141.3	33.85	8.29	13.289	0.21	0.57	0.12	0.01	0.09
2021-06-03	09:00:00	2021-06-03 09:00:00	5381.83	9219.98	1147.17	134	16.32	39820.8	135.3	33.86	8.28	13.057	0.31	1.52	0.15	0	0.08
2021-06-03	13:00:00	2021-06-03 13:00:00	10822.2	12702.3	1878.84	93	7.26	40360	154.6	33.84	8.38	13.655	0.47	1.51	0.36	0.03	0.14
2021-06-03	17:00:00	2021-06-03 17:00:00	10700.1	12499.4	1803.57	374	3.58	40614.8	160.2	33.8	8.42	13.965	0.26	1.3	0.37	0.06	0.09
2021-06-03	21:00:00	2021-06-03 21:00:00	11636.7	15606.9	4174.6	5	3.99	40198.5	155.5	33.9	8.4	13.419	0.28	1.67	0.15	0.03	0.14
2021-06-04	01:00:00	2021-06-04 01:00:00	5511.34	12302.9	3133.05	0	6.48	40035.9	145.6	33.89	8.36	13.259	0.29	1.52	0.12	0.03	0.1
2021-06-04	05:00:00	2021-06-04 05:00:00	9951.13	7924.72	1841.04	1	9.1	39545.8	134.3	33.88	8.29	12.749	0.46	1.97	0.36	0.05	0.15
2021-06-04	09:00:00	2021-06-04 09:00:00	8869.72	8247.29	2035.53	440	10.69	39388.4	133.1	33.89	8.29	12.563	0.29	1.42	0.14	0.03	0.08
2021-06-04	13:00:00	2021-06-04 13:00:00	6082.26	9530.83	2685.07	375	NA	NA	NA	NA	NA	NA	0.25	1.46	0.2	0.03	0.07
2021-06-04	17:00:00	2021-06-04 17:00:00	5435.76	8382.61	2499.62	103	7.59	39498.1	137.9	33.91	8.33	12.661	0.1	1.46	0.08	0.02	0.08
2021-06-04	21:00:00	2021-06-04 21:00:00	10055.5	8554.68	2037.34	1	20.45	39489.5	136.2	33.9	8.32	12.663	0.34	2.22	0.12	0.04	0.14
2021-06-05	01:00:00	2021-06-05 01:00:00	2959.05	5297.05	1021.65	0	4.57	39542.4	132.9	33.91	8.31	12.702	0.27	2.11	0.4	0.03	0.12
2021-06-05	05:00:00	2021-06-05 05:00:00	4353.71	6409.99	1453.02	0	4.13	39376.9	129.2	33.92	8.28	12.52	0.18	1.92	0.06	0.02	0.07
2021-06-05	09:00:00	2021-06-05 09:00:00	3791.43	6859.55	1881.73	227	10.89	39495.2	135.5	33.92	8.32	12.65	0.13	1.34	0.31	0.02	0.07
2021-06-05	13:00:00	2021-06-05 13:00:00	3295.09	5654.53	1557.96	431	5.21	39779.3	147.2	33.83	8.42	13.044	0.17	0.86	0.23	0.02	0.11
2021-06-05	17:00:00	2021-06-05 17:00:00	3561.23	3789.45	864.353	389	7.41	40242.2	153.3	33.85	8.46	13.522	0.22	2.3	0.32	0.06	0.11
2021-06-05	21:00:00	2021-06-05 21:00:00	3286.39	5358.5	1359.45	7	9.04	40326.3	153.2	33.86	8.47	13.593	0.22	1.26	0.18	0.06	0.09
2021-06-06	01:00:00	2021-06-06 01:00:00	2225.88	4122.1	1281.05	0	4.38	40250	151.4	33.87	8.46	13.505	0.16	1.56	0.13	0.03	0.12
2021-06-06	05:00:00	2021-06-06 05:00:00	3066.1	6559.56	1816.83	1	16.05	40142.8	148.4	33.87	8.46	13.391	0.1	1.38	0.11	0.03	0.06
2021-06-06	09:00:00	2021-06-06 09:00:00	4137.25	6372.33	1662.37	167	13.01	40164	149.2	33.89	8.46	13.394	0.23	1.27	0.06	0.02	0.11
2021-06-06	13:00:00	2021-06-06 13:00:00	2877.43	5232.32	1226.92	499	6.08	39969.7	149.9	33.88	8.46	13.194	0.22	1.84	0.1	0.02	0.09
2021-06-06	17:00:00	2021-06-06 17:00:00	1230.97	2017.25	429.646	20	7.58	39954.6	153.1	33.9	8.47	13.153	0.15	1.09	0.12	0.05	0.11
2021-06-06	21:00:00	2021-06-06 21:00:00	2245.94	5145.87	1160.52	0	9.34	39909.6	152.3	33.9	8.47	13.112	0.16	0.86	0.05	0.03	0.08
2021-06-07	01:00:00	2021-06-07 01:00:00	3122.26	9525.72	2297.22	0	5.46	39768.6	147.4	33.9	8.44	12.957	0.19	1.17	0.1	0.03	0.12
2021-06-07	05:00:00	2021-06-07 05:00:00	3913.79	9669.59	2195.15	0	12.22	39635.6	142.4	33.9	8.43	12.821	0.23	1.22	0.38	0.03	0.07
2021-06-07	09:00:00	2021-06-07 09:00:00	7797.37	11393.5	2953.5	12	5.36	39571.2	142.7	33.88	8.43	12.771	0.08	1.16	0.56	0.33	0.29
2021-06-07	13:00:00	2021-06-07 13:00:00	8988.54	12953.4	1738.25	119	NA	NA	NA	NA	NA	NA	0.08	1	0.09	0.03	0.08
2021-06-07	17:00:00	2021-06-07 17:00:00	3500.14	7063.79	1504.47	168	1.23	40997.1	150.2	33.91	8.51	14.249	0.12	0.76	0.09	0.03	0.08
2021-06-07	21:00:00	2021-06-07 21:00:00	4125.7	8233.32	2706.9	3	4.16	40530.2	149.7	33.93	8.48	13.733	0.12	0.92	0.06	0.04	0.1
2021-06-08	01:00:00	2021-06-08 01:00:00	4448.9	8187.54	1848.11	0	7.63	40030.6	148.2	33.87	8.45	13.266	0.14	1.05	0.06	0.06	0.1
2021-06-08	05:00:00	2021-06-08 05:00:00	3993.09	8971.08	1280.99	1	12.45	39975.5	144	33.87	8.43	13.211	0.08	1.27	0	0.03	0.07
2021-06-08	09:00:00	2021-06-08 09:00:00	3942.92	9177.81	1584.82	102	1.28	39989.8	141.9	33.88	8.43	13.211	0.14	1.41	0.02	0.04	0.06
2021-06-08	13:00:00	2021-06-08 13:00:00	4167.14	7729.1	1338.53	167	NA	NA	NA	NA	NA	NA	0.07	0.85	0.04	0.02	0.06
2021-06-08	17:00:00	2021-06-08 17:00:00	4804.22	7757.91	1294.07	507	1.12	40030.4	149.7	33.91	8.43	13.229	0.11	0.83	0.09	0.02	0.08
2021-06-08	21:00:00	2021-06-08 21:00:00	3561.31	6446.31	972.246	4	5.15	41526.3	143.8	33.9	8.5	14.815	0.15	3.12	0.05	0.03	0.07
2021-06-09	01:00:00	2021-06-09 01:00:00	3052.63	5874.57	592.403	0	1.55	41493.8	141.3	33.89	8.5	14.793	0.17	2.25	0.02	0.02	0
2021-06-09	05:00:00	2021-06-09 05:00:00	3711.62	6717.93	815.329	1	1.75	41197.4	140.1	33.87	8.49	14.506	0.16	2.12	0.03	0.02	0
2021-06-09	09:00:00	2021-06-09 09:00:00	3792.99	6514.39	850.227	155	0.64	41181.5	138.6	33.87	8.48	14.489	0.17	2.11	0.02	0.01	0
2021-06-09	13:00:00	2021-06-09 13:00:00	3203.66	6306.05	926.506	160	NA	NA	NA	NA	NA	NA	0.17	2.19	0.06	0.02	0
2021-06-09	17:00:00	2021-06-09 17:00:00	2836.81	6399.6	828.197	346	0.38	42360.5	140	33.9	8.48	15.682	0.14	1.83	0.14	0.02	0.03
2021-06-09	21:00:00	2021-06-09 21:00:00	3806.95	4797.46	746.281	4	0.62	42516.2	139.6	33.92	8.5	15.826	0.11	0.62	0.05	0.02	0
2021-06-10	01:00:00	2021-06-10 01:00:00	2608.51	6139.95	526.392	0	1.72	42025.8	140.4	33.93	8.5	15.301	0.14	0.79	0.58	0.52	0.37
2021-06-10	05:00:00	2021-06-10 05:00:00	3227.76	5770.41	737.246	1	1.07	41751.2	139.8	33.92	8.5	15.026	0.13	0.98	0.12	0.03	0.02
2021-06-10	09:00:00	2021-06-10 09:00:00	2038.77	5997.82	843.666	104	0.81	41729.4	135.7	33.88	8.48	15.044	0.12	1.42	0.05	0.03	0.02
2021-06-10	13:00:00	2021-06-10 13:00:00	3267.7	6153.27	672.269	241	NA	NA	NA	NA	NA	NA	0.16	1.49	0.09	0.04	0.03
2021-06-10	17:00:00	2021-06-10 17:00:00	2901.71	5916.37	771.495	263	1.04	42271.4	133.1	33.9	8.47	15.587	0.12	2	0.05	0.03	0
2021-06-10	21:00:00	2021-06-10 21:00:00	2364.32	5256.61	680.981	4	1.21	41762.8	137.1	33.86	8.48	15.103	0.12	1.74	0.03	0.03	0
2021-06-11	01:00:00	2021-06-11 01:00:00	3174.76	6011.83	615.401	0	1.47	41480.3	134.3	33.89	8.46	14.775	0.12	1.37	0	0.03	0
2021-06-11	05:00:00	2021-06-11 05:00:00	2278.26	5214.77	600.164	1	0.52	41037.4	132.5	33.9	8.42	14.295	0.13	1.19	0.1	0.03	0
2021-06-11	09:00:00	2021-06-11 09:00:00	2755.46	4507.39	595.617	363	0.57	41081.1	130.9	33.89	8.42	14.355	0.16	2.16	0.11	0.04	0.06
2021-06-11	13:00:00	2021-06-11 13:00:00	1614.14	3356.06	576.483	564	NA	NA	NA	NA	NA	NA	0.11	3.13	0.09	0.02	0
2021-06-11	17:00:00	2021-06-11 17:00:00	2713.73	3333.92	343.96	552	NA	NA	NA	NA	NA	NA	0.14	2.83	0.04	0.03	0
2021-06-11	21:00:00	2021-06-11 21:00:00	3450.09	3219.45	710.581	6	NA	NA	NA	NA	NA	NA	0.55	6.26	2.13	0.12	0.3
2021-06-12	01:00:00	2021-06-12 01:00:00	3724.07	3578.19	847.852	0	0.71	39898.6	106.3	33.82	8.26	13.189	0.42	5.58	1.12	0.08	0.05
2021-06-12	05:00:00	2021-06-12 05:00:00	3899.17	3571.12	752.283	2	0.89	40070.9	105.9	33.85	8.27	13.334	0.35	4.8	0.67	0.06	0.04
2021-06-12	09:00:00	2021-06-12 09:00:00	3742.04	3997.51	694.813	840	NA	NA	NA	NA	NA	NA	0.24	3.7	0.2	0.04	0.06
2021-06-12	13:00:00	2021-06-12 13:00:00	2910.15	3087.73	426.861	1	NA	NA	NA	NA	NA	NA	0.18	3.43	0.14	0.05	0.03
2021-06-12	17:00:00	2021-06-12 17:00:00	2021.89	2663.67	429.926	310	0.69	40909	111.7	33.9	8.32	14.169	0.21	4.13	0.08	0.04	0.03
2021-06-12	21:00:00	2021-06-12 21:00:00	2186.5	3753.94	759.396	2	0.67	40053.2	109.9	33.88	8.26	13.286	0.32	5.43	0.15	0.06	0.12
2021-06-13	01:00:00	2021-06-13 01:00:00	2697.98	2863.09	570.127	0	1.4	40113.8	112.8	33.86	8.28	13.365	0.21	3	0.08	0.04	0.04
2021-06-13	05:00:00	2021-06-13 05:00:00	2009.31	2710.23	582.543	0	1.07	40146.3	104.9	33.85	8.24	13.416	0.33	4.32	0.16	0.04	0.15
2021-06-13	09:00:00	2021-06-13 09:00:00	1925.23	2118.37	566.977	172	0.68	40826.8	106.2	33.77	8.32	14.22	0.24	4.07	0.08	0.04	0.05
2021-06-13	13:00:00	2021-06-13 13:00:00	1408.15	2311.61	457.96	449	NA	NA	NA	NA	NA	NA	0.2	3.95	0.16	0.03	0.03
2021-06-13	17:00:00	2021-06-13 17:00:00	1202.56	2648.11	411.235	255	0.5	41054	108.6	33.8	8.32	14.43	0.17	2.36	0.02	0.06	0.04
2021-06-13	21:00:00	2021-06-13 21:00:00	2031.3	2249.38	461.093	12	1.04	40918.9	107.8	33.79	8.32	14.299	0.14	1.91	0.02	0.05	0.12
2021-06-14	01:00:00	2021-06-14 01:00:00	1891.2	3508.21	414.379	0	0.71	41059.6	107	33.76	8.32	14.486	0.17	2.58	0.02	0.05	0.05
2021-06-14	05:00:00	2021-06-14 05:00:00	2299.27	3844.59	619.993	3	0.75	40922.8	104.5	33.68	8.31	14.434	0.15	2.92	0.03	0.04	0.02
2021-06-14	09:00:00	2021-06-14 09:00:00	2031.5	3380.56	542.132	384	0.46	40955.4	105.1	33.71	8.31	14.425	0.15	2.46	0.02	0.03	0.06
2021-06-14	13:00:00	2021-06-14 13:00:00	1884.96	3520.66	579.502	558	NA	NA	NA	NA	NA	NA	0.18	2.66	0.03	0.04	0.01
2021-06-14	17:00:00	2021-06-14 17:00:00	1423.83	3271.38	548.344	51	0.72	41401.1	105.8	33.73	8.3	14.87	0.17	2.81	0.04	0.04	0.08
2021-06-14	21:00:00	2021-06-14 21:00:00	NA	NA	NA	10	0.86	41379	106.7	33.75	8.31	14.829	0.17	2.38	0.01	0.04	0.08
2021-06-15	01:00:00	2021-06-15 01:00:00	1405.15	2850.79	585.736	0	0.67	41143	105.3	33.75	8.29	14.581	0.19	1.99	0.06	0.05	0.05
2021-06-15	05:00:00	2021-06-15 05:00:00	NA	NA	NA	1	0.7	41003.5	103.4	33.77	8.28	14.41	0.2	2.12	0.05	0.04	0.07
2021-06-15	09:00:00	2021-06-15 09:00:00	NA	NA	NA	178	0.62	41026.2	103	33.77	8.27	14.434	0.21	2.18	0.04	0.04	0.07
2021-06-15	13:00:00	2021-06-15 13:00:00	NA	NA	NA	622	NA	NA	NA	NA	NA	NA	0.2	1.77	0	0.04	0.03
2021-06-15	17:00:00	2021-06-15 17:00:00	NA	NA	NA	87	0.31	41589.2	106.6	33.75	8.28	15.045	0.26	3.01	0.06	0.04	0.09
2021-06-15	21:00:00	2021-06-15 21:00:00	1589.74	3010.92	533.014	1	0.79	41838.3	106.6	33.82	8.28	15.227	0.19	1.09	0	0.05	0.1
2021-06-16	01:00:00	2021-06-16 01:00:00	NA	NA	NA	0	0.82	41598.6	105.7	33.8	8.28	15.006	0.2	1.4	0	0.04	0.07
2021-06-16	05:00:00	2021-06-16 05:00:00	NA	NA	NA	0	0.62	41483.3	102.7	33.78	8.26	14.9	0.19	1	0	0.04	0.06
2021-06-16	09:00:00	2021-06-16 09:00:00	NA	NA	NA	567	0.25	41512.4	100.5	33.78	8.24	14.934	0.23	1.48	0.08	0.04	1.41
2021-06-16	13:00:00	2021-06-16 13:00:00	NA	NA	NA	414	NA	NA	NA	NA	NA	NA	0.2	2.15	0	0.04	0.06
2021-06-16	17:00:00	2021-06-16 17:00:00	NA	NA	NA	1	0.3	41651.1	106.8	33.82	8.26	15.03	0.23	2.03	0	0.06	0.09
2021-06-16	21:00:00	2021-06-16 21:00:00	NA	NA	NA	10	0.23	41364	107.3	33.85	8.27	14.693	0.23	1.51	0.01	0.05	0.06
2021-06-17	01:00:00	2021-06-17 01:00:00	NA	NA	NA	0	1.15	40935	104.3	33.8	8.26	14.299	0.26	1.36	0.11	0.11	0.18
2021-06-17	05:00:00	2021-06-17 05:00:00	NA	NA	NA	1	0.69	40970.3	103	33.8	8.26	14.342	0.24	1.23	0.08	0.04	0.08
2021-06-17	09:00:00	2021-06-17 09:00:00	NA	NA	NA	884	0.18	41170.7	102.2	33.79	8.25	14.57	0.29	2.4	0.13	0.05	0.09
2021-06-17	13:00:00	2021-06-17 13:00:00	1491.97	3249.99	557.646	233	NA	NA	NA	NA	NA	NA	0.41	5.57	0.31	0.04	0.05
2021-06-17	17:00:00	2021-06-17 17:00:00	NA	NA	NA	2	0.2	42625.9	104.5	33.85	8.24	16.022	0.22	1.04	0.04	0.05	0.04
2021-06-17	21:00:00	2021-06-17 21:00:00	3740.68	4271.35	538.021	22	0.38	44505.9	107.9	33.87	8.25	17.931	0.19	0.56	0.1	0.05	0.06
2021-06-18	01:00:00	2021-06-18 01:00:00	NA	NA	NA	0	0.46	42566.1	104.8	33.84	8.26	15.968	0.16	0.22	0.04	0.1	0.1
2021-06-18	05:00:00	2021-06-18 05:00:00	NA	NA	NA	3	1.14	41428.4	100.5	33.87	8.18	14.748	0.42	3.39	0.89	0.07	0.17
2021-06-18	09:00:00	2021-06-18 09:00:00	NA	NA	NA	128	1.52	40002.3	95.7	33.89	8.07	13.223	0.55	7.28	1.99	0.15	0.23

## Sheet: Dataset 3
Harmful algal blooms preceded by a predictable and quantifiable shift in the oceanic microbiome
Dataset 3 - Peptide abundance time series
Peptide	16.17	16.21	17.01	17.05	17.09	17.13	17.17	17.21	18.01	18.05	18.09	18.13	18.17	18.21	19.01	19.05	19.09	19.13	19.17	19.21	20.01	20.05	20.09	20.13	20.17	20.21	21.01	21.05	21.09	21.13	21.17	21.21	22.01	22.05	22.09	22.13
AGIVMPGYLSTSQDLK	0	10200	4150000	47900	4920000	1810000	11100000	12300000	0	2590000	1240000	22200	14100	77000	196000	1400000	0	0	0	27900	128000	925000	41800	619000	1520000	0	0	208000	0	0	55100	28900	0	44500	0	0
AGDLITEAGQEK	7490000	3480000	2070000	1880000	2210000	NA	3130000	2710000	637000	1420000	3840000	2120000	1690000	74900	1140000	1470000	1790000	5760000	2610000	1310000	1440000	4700000	1650000	4050000	3070000	2000000	2510000	1020000	2670000	2380000	4310000	5860000	2420000	1620000	2960000	2590000
EAFDLFDTDGSGTIDAK	84900	10500000	4740000	726000	3800000	13300000	22100000	8560000	NA	18300000	15400000	NA	4730000	34600	99900	7030000	14600	223000	11300000	6280000	4990000	16400000	239000	4160000	5790000	0	61900	7350000	5880000	2570000	12400000	7290000	761000	13500000	562000	2390000
VVAPDVGGGFGTK	19300000	22400	35200000	17800000	NA	13500000	3090000	19900000	22300000	14700000	NA	624000	43900	1110000	488000	29600000	17600000	17900000	580000	NA	16500000	21100000	18400000	17200000	2670000	18100000	6580000	477000	20300000	8970000	14900000	12000000	181000	19600000	12600000	18300000
AVFTNTVPVDAYR	0	39900	15200000	NA	277000	20300	16400000	74100	75900	650000	84300	8720	317000	0	0	406000	0	113000	260000	4120000	842000	527000	1250000	0	402000	0	132000	559000	2380000	1090000	72800	214000	254000	42900	56500	34100
NTTWTFSR	68100000	165000000	230000000	118000000	116000000	6840000	248000000	151000000	130000000	118000000	106000000	107000000	142000000	10200000	2500000	6760000	18000000	71400000	70900000	115000000	98500000	2100000	89900000	182000000	735000	4120000	5210000	79200000	205000000	161000000	149000000	1490000	116000000	8150000	107000000	94200000
GTADLDER	1300000	2000000	509000	761000	1540000	17100000	1610000	1660000	16600000	1140000	719000	2160000	934000	695000	233000	1540000	552000	10000000	9330000	15900000	16700000	3930000	9730000	3800000	NA	1840000	251000	1330000	2250000	1430000	15800000	14000000	NA	10900000	2190000	11800000
AGVNVASISGDDAENEEGR	36600	270000	732000	0	295000	0	819000	1360000	16900	80700	0	161000	495000	0	0	213000	34800	0	0	23800	0	59600	0	0	162000	0	0	172000	32200	0	21300	0	0	10000	37800	0
DASEGGSAQIR	11400000	2510000	1890000	5070000	5010000	4870000	5920000	1900000	470000	5200000	382000	616000	5830000	3400000	0	2270000	4130000	2070000	9720000	4540000	667000	1760000	865000	1580000	3920000	110000	72400	52300	1190000	461000	1420000	1050000	0	544000	1280000	3140000
EIAQDFK	260000000	5530000	422000000	332000000	360000000	250000000	437000000	555000000	490000000	240000000	217000000	1380000	2370000	9890000	3990000	392000000	169000000	154000000	8370000	217000000	159000000	229000000	158000000	259000000	3020000	168000000	177000000	263000000	226000000	340000000	216000000	190000000	164000000	275000000	188000000	189000000
FGPGIEGFAR	109000	74000	1870000	473000	85900	46100	545000	1270000	0	707000	31100	0	433000	905000	0	0	0	0	567000	74300	0	5000000	1350000	4590000	77000	0	422000	8410000	6810000	0	2230000	557000	587000	11900000	2290000	1640000
VGADANQVR	56500	0	0	0	259000	34300	0	74500	2110000	38600	0	18800	1510000	1670000	789000	0	145000	82700	303000	531000	187000	447000	0	0	601000	172000	0	631000	0	0	0	117000	0	114000	40000	1200000
AVIEAGNNFGR	11700000	16400000	13400000	12400000	17800000	12500000	20400000	18700000	21100000	12200000	219000	170000	23100000	25500000	19600000	20100000	11600000	16800000	26500000	12000000	12200000	14600000	17200000	20000000	25300000	10300000	8100000	20300000	12700000	16100000	21600000	22700000	27000000	12800000	30700000	19600000
VLPSIGNEVLK	875000	12400000	18400000	1420000	731000	11400000	22000000	22600000	NA	12000000	68600	35400	86500	0	8920	12800000	36000	17100000	314000	12700000	9730000	8820000	3050000	9360000	459000	12500000	356000	231000	3790000	22900000	15100000	8040000	0	28900000	2410000	6540000
SPFVTSGLR	32300000	680000	6010000	11600000	10300000	833000	14500000	11700000	699000	11400000	613000	NA	159000	120000	60200	3710000	351000	10000	403000	12400000	249000	5750000	3630000	8630000	407000	997000	763000	750000	3570000	3240000	11600000	14600000	9330000	914000	9560000	5500000
VGTPAITTR	47900000	26700000	9490000	15400000	15100000	27900000	12300000	12100000	11500000	10400000	15000000	12200000	16200000	10600000	8410000	8970000	19500000	22500000	22400000	14900000	8130000	4500000	8660000	14000000	18500000	14600000	1240000	4970000	4870000	4560000	20300000	16800000	13100000	1930000	22200000	10300000
TLLAQTLAR	20400000	1510000	12000000	19500000	27000000	23600000	22100000	20600000	1590000	1310000	5460000	1420000	22500000	1570000	3210000	29500000	0	3090000	46900000	15800000	1110000	24100000	24200000	38300000	30800000	240000	4980000	5550000	27000000	12600000	33300000	NA	21000000	1710000	38100000	33800000
DVSGEGVQQALLK	7050000	95400	2880000	3400000	5060000	3730000	3330000	3860000	3260000	4360000	6450000	420000	4520000	4200000	2300000	3070000	1570000	6150000	11400000	1040000	1320000	4600000	2610000	5280000	4750000	4530000	273000	3240000	3070000	3620000	4750000	8150000	5360000	2530000	7250000	4610000
QADNVSVYSAR	37200000	61500000	57200000	33900000	41400000	36700000	71400000	56500000	58800000	20300000	19200000	24900000	40100000	63900000	2000000	18200000	39400000	24300000	13000000	26300000	23900000	23600000	30900000	50400000	44400000	42600000	15000000	36100000	75200000	50800000	51400000	63100000	60200000	30300000	29200000	21300000
LSDYGVQLR	91200000	128000000	63600000	83700000	58500000	86100000	81000	71400000	56500000	139000	172000	53700000	51600000	41200000	48900000	72700000	89200000	77400000	315000	38600000	41600000	78300000	0	76200000	76100000	72400000	655000	56000000	92400000	44500000	92400000	59300000	69100	1440000	87000000	105000000
LDNVVYR	50900000	3660000	45800000	66100000	41900000	31200000	60000000	67900000	45700000	28000000	28400000	373000	48200000	960000	1110000	63300000	34200000	32100000	2580000	33000000	27500000	41100000	2670000	4260000	54700000	37200000	32700000	46800000	63200000	47500000	55300000	32200000	47400000	53400000	81200000	55200000
STPFAAQVAAER	15700000	20700000	6360000	6920000	8110000	NA	7930000	7690000	NA	10400000	11600000	9720000	38200	10600000	0	5510000	49000	741000	16300000	782000	0	5460000	2190000	5120000	10400000	557000	348000	8830000	3420000	396000	7480000	591000	10500000	7010000	9160000	6400000
YTESEIDR	17200000	12500000	5820000	12900000	8140000	12900000	8290000	10200000	9960000	10600000	13400000	7950000	10400000	4600000	4540000	7510000	13800000	14300000	18900000	9830000	8620000	7950000	9560000	10000000	9730000	4370000	7320000	7580000	9480000	8160000	11600000	13700000	11000000	8060000	14600000	12000000
NFLLPQGK	0	18800000	10800000	0	18100000	36400000	30000000	17500000	29900	29900000	33100000	25500000	26800000	19900000	17100000	40800000	0	8290000	12300	28000000	20400	0	23700000	35200000	37500000	0	28500000	22100000	0	296000	61900000	65200000	38400000	21600000	0	60800000
TDLLLDNNDLER	564000	411000	334000	1670000	218000	NA	425000	575000	32100	1120000	65800	206000	58300	0	0	845000	0	NA	235000	116000	1060000	1360000	100000	582000	94900	NA	0	61100	268000	382000	2550000	1470000	271000	885000	209000	844000
FYALPQAPQQFK	37600000	25900000	8610000	25400000	19200000	16800000	15000000	1790000	30000000	NA	34100000	23000000	5360000	20800000	617000	20500000	7020000	45600000	5950000	28500000	43100000	22800000	5670000	4600000	33900000	27700000	595000	11900000	9210000	NA	47600000	9140000	NA	16300000	6990000	39600000
SSVVSPPVAASR	147000000	91900	212000000	80700000	127000000	90800000	162000000	187000000	149000000	84600000	89500000	81400000	121000000	103000000	91600000	73800000	65100000	43200000	41800000	69000000	53900000	47100000	35700000	62200000	65800000	60500000	53600000	73700000	55000000	92800000	60500000	35400000	27500000	82100000	47000000	39400000
NGNDIINPR	10100000	5900000	111000000	91500000	74400000	92700000	131000000	126000000	86400000	76600000	96300000	9490000	6960000	74300000	50800000	44200000	6280000	49100000	47400000	63200000	48100000	5430000	61900000	74700000	64200000	42600000	56000000	57200000	47400000	5990000	9450000	46500000	26600000	90800000	6760000	49500000
NAQNGQLTNR	58500000	27100	74100000	45700000	62200000	39000000	78200000	101000000	66800000	23400000	27300000	166000	184000	42300	30800000	31100000	16000000	21000000	12100000	29000000	15100000	19500000	10900000	21400000	28200000	17000000	22200000	27800000	23200000	36100000	19300000	12000000	7490000	31000000	15700000	13900000
AGLDFYNER	1610000	136000000	204000000	49700000	3540000	56700000	1760000	182000000	157000000	201000	71700000	71200000	91400000	5510000	5480000	102000000	5180000	35600000	1790000	48400000	637000	26000000	34400000	55600000	4660000	721000	30900000	983000	9070000	59100000	46600000	24500000	36200000	7080000	39400000	36500000
ISALGPGGLTR	92300000	31900	0	97500	0	99400000	11300	0	55900000	72500000	85800000	53300	46100000	32800000	0	37100	103000000	117000000	123000000	54700000	57800000	77300000	0	0	115000	103000000	0	0	68800000	8340	275000	118000000	54900	0	0	97200
INTLGFIETPYR	0	0	0	974000	6170000	0	11900000	9710000	0	5950000	6820000	50700	10000000	0	0	7280000	0	0	627000	0	0	7980000	714000	1500000	8200000	0	224000	6080000	98100	0	149000	64700	1240000	6090000	1090000	0
GLAASTLYGTAGR	70400000	5940000	175000000	42500000	124000000	61100000	146000000	171000000	141000000	65500000	993000	68700000	2960000	799000	9320000	73400000	41700000	47700000	25200000	37200000	39200000	49700000	1490000	7950000	5810000	25700000	19900000	65500000	46700000	52500000	6000000	22400000	4290000	62800000	2200000	810000
NGVIVITTK	1000000	201000	NA	2310000	4700000	10400000	14400000	NA	NA	NA	445000	1220000	NA	458000	500000	1190000	285000	2510000	2430000	654000	NA	1440000	202000	NA	NA	1240000	1160000	957000	3030000	3890000	3640000	837000	94500	1160000	1210000	582000
SSVESPPVAASR	510000	0	65900	176000	1350000	0	1090000	1940000	53500	426000	245000	0	0	0	110000	181000	37400	32100	61800	0	0	1200000	39500	1110000	2370000	0	32500	1010000	2000000	914000	2700000	1580000	1590000	2190000	2190000	818000
LQGQGIADQR	21100000	17100000	6420000	8120000	6650000	11700000	12700000	8150000	6270000	8050000	10400000	11900000	6590000	2400000	92500	4030000	666000	9080000	NA	5230000	NA	7610000	3900000	6530000	10700000	11500000	2460000	5290000	4840000	8150000	8620000	7590000	9480000	2900000	13400000	9310000
VGINGFGR	31600000	235000	8980000	33700000	18400000	1580000	25900000	27200000	185000	27600000	455000	747000	343000	866000	0	1110000	39400	3260000	540000	NA	384000	14100000	11500000	20500000	859000	293000	4500000	1060000	NA	18200000	NA	16500000	13000000	19600000	19300000	23800000
IFSNASCTTNCLAPITK	2850000	3040000	1940000	1480000	1990000	2270000	1240000	714000	1820000	9850	0	1740000	249000	1250000	0	138000	119000	4590000	199000	1900000	338000	1810000	1770000	2560000	104000	12700	54100	99900	2270000	12600	385000	3100000	743000	1120000	1310000	1980000
GVIDSPDIPLNVSR	39000000	14700000	209000	38500000	79500	74300000	47200000	23100000	45900000	162000	21100000	11500000	19400000	628000	699000	24700000	78000000	50400000	13900000	513000	52300000	683000	14500000	576000	19500000	59000000	16000000	27100000	287000	500000	319000	654000	4970000	950000	22800000	21700000
INQAGTGQFER	3350000	146000	64600	1080000	4180000	30800	2790000	3820000	0	659000	57300	1380000	9780	49000	0	745000	190000	79900	3300000	NA	213000	2130000	1640000	1670000	793000	42400	581000	1560000	2250000	499000	682000	2070000	1090000	1460000	4640000	3360000
TTLTAALTK	163000000	18400000	34000000	220000000	64500000	141000000	60200000	54600000	104000000	131000000	200000000	17100000	116000000	47200000	55500000	3630000	158000000	218000000	4320000	81100000	108000000	128000000	71700000	126000000	132000000	136000000	156000000	114000000	129000000	113000000	120000000	163000000	141000000	86300000	151000000	108000000
DYADIDNAPEER	47400000	1610000	3850000	22200000	14200000	31000000	12400000	9790000	6040000	20900000	991000	13000000	8340000	3390000	6880000	303000	33300000	29800000	160000	19800000	17100000	10800000	11500000	10000000	21700000	25900000	7680000	4800000	8260000	7930000	26500000	25900000	22300000	2150000	37100000	21000000
EFFEFVQK	0	NA	275000	0	1310000	0	5620000	1270000	0	8750000	7700000	2720000	NA	693000	64600	366000	0	0	NA	176000	0	6490000	737000	4640000	11600000	0	0	4300000	29600	0	0	0	6800000	2670000	4250000	2430000
VELSSPSGTQIR	620000	392000	2810000	455000	2970000	1890000	2190000	511000	1090000	180000	2330000	288000	1440000	549000	97600	1550000	1750000	2490000	200000	658000	2090000	841000	903000	3050000	999000	1820000	210000	1540000	1420000	1020000	1240000	922000	107000	1620000	45200	1300000
IMETFSVVPSPK	NA	3850000	1790000	4000000	992000	NA	768000	551000	1150000	NA	7780000	2030000	806000	2700000	1060000	NA	1270000	2650000	7060000	1640000	1890000	1260000	524000	NA	1870000	472000	1920000	4370000	1350000	NA	4100000	2640000	4880000	4210000	572000	1620000
VADLFEAR	56600000	17600000	28600000	38000000	26200000	1750000	59100000	29500000	49800000	37700000	38700000	366000	42800000	21200000	1140000	36300000	9740000	41100000	67600000	21100000	54100000	19400000	43900000	9410000	28600000	8220000	24800000	35000000	59000000	1360000	3190000	54700000	22600000	22300000	324000	46100000
LDDGQPLVEVAR	122000000	91300000	22600000	117000000	75500000	278000000	39600000	25800000	57700000	266000000	281000000	3760000	3600000	757000	3860000	310000000	288000000	383000000	261000000	169000000	151000000	587000000	180000000	195000000	187000000	142000000	120000000	233000000	212000000	238000000	167000000	118000000	173000000	210000000	243000000	263000000
GALIVGPPGTGK	934000	1990000	55600000	1520000	65300000	91100000	62700000	59600000	51600000	69100000	80700000	2640000	54000000	37200000	1170000	1970000	94200000	74500000	1710000	55000000	58200000	73700000	190000	60700000	52800000	60800000	39900000	51500000	72900000	35600000	61500000	89300000	37100000	66000000	63600000	58200000
LAGINVLR	282000000	14700000	4920000	344000000	10300000	7990000	9240000	10000000	189000000	13500000	937000	1050000	14700000	8390000	10200000	1720000	146000000	289000000	2530000	1980000	18500000	10400000	8810000	13100000	12700000	16700000	2670000	13400000	1710000	228000000	182000000	4600000	11900000	11000000	10300000	7170000
VIDIWSQANDR	1300000	12300000	3390000	2790000	1700000	91900	3610000	2200000	178000	6210000	6400000	55500	2330000	3120000	0	5220000	0	87400	81000	137000	0	5760000	2080000	7370000	5850000	117000	121000	515000	2620000	0	7600000	NA	2730000	1250000	1280000	3600000
TANSGYLTR	73500000	54700000	19500000	54500000	26000000	42200000	98800	28700000	29900000	203000	48200000	31000000	1700000	373000	26200000	804000	32000000	67600000	961000	28000000	733000	35000000	34300000	49600000	35400000	41400000	41000000	25500000	35700000	42300000	42400000	46900000	150000	647000	78800000	59900000
ALQDAAAQPENR	0	0	0	0	0	0	36000	0	0	175000	0	50100	35400	0	0	29900	26800	0	167000	669000	1520000	976000	0	4460000	5620000	7430000	0	1760000	22500	1990000	11500000	12900000	5290000	1210000	4300000	1690000
AGVDTISFDR	8370000	15600000	4960000	12400000	3580000	84300	7450000	4970000	127000	8380000	10900000	7650000	180000	3240000	0	8340000	272000	47400	15500000	6780000	6400000	12800000	7670000	12100000	10500000	2710000	6400000	10000000	6440000	7720000	14200000	8670000	4890000	13900000	11000000	9930000
ELELVGVGYR	27400000	96600000	65900000	46300000	60900000	55000000	66100000	56800000	15900000	53500000	844000	46000000	809000	623000	937000	58600000	622000	1480000	68700000	43400000	31400000	420000	1430000	32500000	9170000	1840000	1180000	29500000	25900000	33900000	46200000	22600000	30700000	41700000	1680000	31800000
QLVGQVAAK	28400000	52100000	1860000	40500000	16100000	16400000	12600000	20000000	14400000	16500000	19100000	19000000	17400000	2640000	1390000	16900000	3470000	28700000	24900000	12900000	13900000	23000000	16100000	17400000	NA	14900000	16500000	16800000	19300000	23500000	26300000	20200000	16500000	30600000	26200000	17600000
FVGEQIR	67100000	792000	31800000	21400000	18100000	1990000	34600000	32500000	6350000	45300000	324000	4150000	63100	1290000	0	955000	NA	2020000	6580000	36500000	2360000	40500000	32300000	35700000	NA	623000	NA	8750000	43800000	27900000	48100000	41900000	26500000	36500000	54500000	55200000
SIGPYSLITQQPLGGK	10100000	1430000	22800000	11100000	561000	5850000	43100000	35300000	1940000	144000	523000	31900000	33500000	817000	119000	15500000	1150000	16500000	61600000	127000	66600	24400000	6330000	23900000	35100000	300000	45200	14700000	13500000	10800000	187000	229000	19200000	13300000	11400000	14100000
IVTDGDDPADSSPR	2600000	4340000	2920000	1310000	1700000	668000	1710000	3420000	729000	480000	32200	1470000	2420000	155000	3670000	1740000	2120000	923000	1790000	1690000	1570000	1620000	33700	3520000	3580000	1360000	187000	5230000	3550000	4530000	3780000	2410000	1540000	5340000	3850000	112000
SFNEAAFSGAQR	137000000	152000000	88600000	93700000	53600000	90400000	90000000	85100000	68000000	86400000	83500000	72700000	72200000	70800000	1620000	45400000	87000000	75100000	57300000	69200000	287000	63400000	50400000	145000000	98400000	132000000	84500	62300000	94900000	75500000	107000000	121000000	79100000	71900000	47500000	52800000
WAEETGGK	NA	10700000	12000000	2070000	2000000	4170000	1770000	2840000	12300000	3590000	3400000	7060000	2550000	996000	1980000	2410000	4080000	3770000	1530000	7290000	5920000	9530000	1900000	1510000	1720000	6240000	6510000	1160000	16300000	11100000	10800000	4590000	1430000	2910000	10400000	9740000
FACGYAQGVK	2090000	394000	39000000	33000000	37000000	28400000	31900000	30000000	40900000	34900000	22600000	5940000	1560000	7750000	29100000	6810000	1500000	29700000	15600000	25300000	30600000	30400000	34000000	46300000	24900000	34800000	12400000	19700000	44000000	2990000	11200000	25100000	22900000	29600000	19400000	42000000
FTQAGSEVSALLGR	21400000	245000000	196000000	66300000	139000000	64500000	0	194000000	974000	0	196000000	0	132000	155000000	127000000	0	0	105000000	0	108000000	0	0	42000000	0	0	0	5510000	158000000	0	0	207000000	89900000	134000000	1360000	35300000	68200000
VFDSSGPEGK	11900000	10500000	2440000	13400000	3240000	12800000	4580000	3500000	3920000	14300000	16200000	12700000	6570000	3740000	4560000	8320000	7950000	13200000	23000000	5680000	7410000	11300000	7720000	11000000	7830000	NA	13800000	7210000	6550000	10900000	19600000	18500000	11200000	9260000	17000000	12200000
AADVGADLVGK	31500000	36700000	40400000	32000000	53200000	25000000	28500000	40000000	47900000	21900000	28600000	1320000	28100000	37000000	28700000	60500000	30800000	36100000	33100000	19800000	24700000	34300000	19300000	23200000	22500000	14000000	29400000	40600000	38000000	43000000	10600000	19100000	18100000	42200000	40100000	31400000
VEAGIPEDDPR	3860000	11000000	23100000	2850000	38600000	1520000	12000000	27100000	25200000	831000	3390000	2750000	10200000	385000	1040000	34000000	NA	2870000	4190000	603000	1930000	3790000	2510000	3600000	3920000	2850000	854000	6530000	5360000	5510000	1590000	1400000	4290000	2740000	6830000	4620000
ADTNNTIDLLK	791000	0	36600	19400	443000	51900	971000	469000	12100	352000	928000	0	0	0	0	740000	37600	66100	305000	103000	0	415000	141000	1480000	1730000	0	42500	0	175000	0	1300000	2250	508000	138000	1270000	1170000
TTLTAAITK	163000000	18400000	34000000	220000000	64500000	141000000	60200000	54600000	104000000	131000000	200000000	17100000	116000000	47200000	55500000	3630000	158000000	218000000	4320000	81100000	108000000	128000000	71700000	126000000	132000000	136000000	156000000	114000000	129000000	113000000	120000000	163000000	141000000	86300000	151000000	108000000
IPVIQEEVEK	738000	3010000	42500	1200000	252000	1000000	344000	1090000	73400	1130000	97700	135000	46400	159000	71000	3490000	2920000	3770000	77900	1630000	1360000	4610000	1270000	2250000	3030000	998000	721000	2690000	1200000	2180000	240000	4020000	4260000	4350000	3580000	2750000
AAGADYAGLDEFIEK	803000	657000	470000	1110000	1740000	403000	4890000	5270000	0	3070000	NA	1160000	1870000	454000	268000	1470000	0	0	NA	537000	0	NA	440000	9650000	394000	0	729000	375000	5860000	441000	1180000	8140000	275000	2900000	409000	1080000
IAELGIYPAVDPLDSTSR	3430000	930000	286000	5390000	10300000	8510000	25200000	17600000	146000	14000000	640000	347000	74000	147000	68000	4690000	41200	569000	412000	10000000	487000	12900000	1090000	14200000	21400000	4640	0	6830000	4920000	4150000	23700000	13100000	7870000	7430000	596000	5750000
NSVPVSEFISEER	5450000	11800000	7590000	4410000	80800	198000	6960000	7420000	41900	1410000	NA	2650000	5160000	3770000	42600	3690000	186000	2170000	53200	496000	NA	4400000	1380000	3560000	59700	2950000	0	2910000	1820000	2970000	4940000	NA	2110000	3430000	4110000	142000
VGIGPGSICTTR	31000000	43700000	26000000	28900000	24000000	19700000	20600000	19600000	27500000	11500000	23800000	20600000	28100000	20500000	22300000	15200000	4580000	33000000	32800000	21600000	12300000	25600000	30600000	33800000	34400000	26400000	17000000	19400000	29100000	8040000	20500000	30900000	24200000	14400000	38400000	44100000
AEDEDQALR	8760000	9710000	513000	4040000	4400000	6470000	430000	11000000	8150000	10300000	10600000	1610000	5820000	77000	1700000	291000	27300000	15100000	1530000	8260000	10400000	9760000	1190000	7450000	1320000	2640000	6700000	1850000	6170000	2050000	4700000	4020000	4700000	202000	7950000	12200000
INSASDDAAGVAVATR	0	0	0	0	397000	233000	7010	29900	0	103000	216000	0	1130000	0	115000	228000	5830	0	1230000	0	96100	140000	0	0	26500	0	0	40700	0	0	18300	69600	191000	0	0	83900
LLDEQNIPEEGR	3040000	211000	2300000	557000	3320000	3890000	234000	421000	2350000	2720000	117000	157000	751000	164000	67200	85800	8680000	18300000	511000	16000000	14000000	7650000	2320000	456000	508000	4070000	3230000	1600000	12200000	553000	4440000	4110000	1350000	2260000	10700000	20300000
GGAAAALYGSR	1490000	5140000	5990000	1500000	1490000	785000	12100000	14000000	3870000	3380000	7090000	1070000	307000	818000	4860000	5240000	1750000	903000	12300000	12100000	461000	14700000	3190000	19800000	1290000	87200	1090000	1140000	16500000	22600000	21700000	37400000	17600000	4320000	17100000	14300000
ASNGVIIINTK	76900000	86500000	71200000	139000	69200000	111000000	135000000	1270000	88800000	69800000	662000	77400000	264000	56100000	14800	457000	211000	37600000	135000	25400000	12800000	18000000	7150000	805000	12400000	10800000	336000	67100	15000000	13800000	15000000	12500000	181000	1940000	259000	7950000
LIEGTVASVPPQGGR	3190000	0	976000	79600	346000	2650000	417000	443000	651000	513000	0	0	23500	0	0	0	710000	31400	1560000	640000	36000	169000	243000	258000	268000	186000	1250	4290	35900	50800	1230000	2190000	0	253000	46200	404000
GALDTAGVEGR	253000000	216000000	118000000	128000000	104000000	173000000	111000000	126000000	111000000	130000000	153000000	116000000	108000000	80100000	75000000	107000000	187000000	156000000	210000000	121000000	150000000	113000000	94100000	99400000	109000000	97000000	141000000	61100000	137000000	106000000	145000000	87600000	88800000	105000000	193000000	139000000
FNDQLVTR	93300000	124000000	67000000	262000	723000	72400000	593000	66000000	68400000	52400000	64100000	253000	68400000	42400000	40000000	866000	82400000	63900000	1400000	45600000	39700000	62700000	45800000	53800000	374000	44600000	44300000	611000	77600000	472000	58700000	40300000	21000000	475000	61400000	71600000
EGTDLFLK	24900000	3140000	0	28000000	14400000	25700000	14800000	22900000	192000	0	28400000	1960000	17000000	1030000	71700	18400000	155000	17200000	42300000	27100000	22300	23700000	18500000	20500000	28400000	3540	25700000	18900000	34400000	24600000	0	10800000	11400000	19600000	20800000	29100000
LSDYAVQLR	10200000	13600000	12300000	8010000	6240000	1180000	24200000	12400000	1120000	10200000	23500000	12400000	11000000	11300000	0	7030000	6220	1300000	29800000	214000	332000	14300000	1860000	14000000	19300000	794000	63600	9490000	668000	363000	7930000	2770000	2990000	12600000	5280000	1320000
GPIPLPTR	745000	475000	28100000	28500000	474000	29000000	39400000	38400000	33300000	583000	17200000	536000	371000	2190000	1850000	1440000	696000	33400000	32600000	24700000	20800000	28700000	19900000	23000000	3030000	23100000	27200000	22700000	40800000	44100000	41700000	23100000	1700000	23800000	46100000	49200000
LLDIVEPTEK	79900000	55100000	21000000	38400000	480000	75800000	1130000	2460000	35600000	46600000	36900000	25000000	28200000	19400000	23300000	659000	70200000	57600000	63200000	37500000	38500000	40200000	25800000	30800000	1000000	42700000	30000000	18100000	42700000	25500000	44500000	29300000	32800000	16600000	61200000	53100000
LGSFDQIR	105000000	63100000	11800000	290000	21400000	64200000	28900000	22500000	25000000	157000	122000000	105000000	31400000	23900000	25800000	68500000	347000	106000000	69800000	59800000	83000000	57500000	181000	100000000	1270000	137000000	75100000	45900000	61700000	75000000	117000000	123000000	67600000	50500000	44200000	2600000
NPQIGDTVPDGNSQPR	798000	0	74700	0	0	57100	480000	289000	153000	160000	0	0	115000	2300	0	0	2090000	48500	0	115000	19600	741000	0	73200	256000	445000	18900	337000	273000	0	174000	108000	0	212000	55300	597000
AAEDPEFETFYTK	2490000	1030000	83900	57500	13900000	618000	15600000	12600000	16200000	8100000	197000	9810000	118000	6640000	0	184000	7340000	5210000	9720000	8340000	2360000	3620000	1010000	565000	5660000	1260000	81900	11200000	397000	9850000	4450000	5450000	2490000	2790000	3570000	1530000
NILLNEGIR	9840000	677000	NA	13600000	42500000	10600000	52000000	50100000	16600000	32700000	52200000	926000	1440000	2420000	1020000	NA	0	6200000	1600000	1250000	752000	19100000	10000000	17300000	22500000	966000	4460000	43000000	1780000	1860000	3310000	2390000	10900000	17400000	13200000	NA
LGANVSSAQGPTGLGK	7460000	10200000	11000000	2900000	8120000	4760000	12600000	12500000	8560000	5750000	7050000	2440000	8140000	5940000	4890000	2260000	2830000	3250000	6170000	4180000	5790000	2170000	1070000	4770000	6440000	4350000	670000	11000000	900000	15600000	7320000	3360000	2480000	5740000	1780000	2620000
VAELFEAR	2070000	95000000	37400000	91300000	5470000	79700000	13200000	1430000	66300000	98700000	13500000	79000000	56600000	51700000	2600000	94000000	4170000	136000000	6000000	56800000	80600000	86200000	62300000	114000000	85000000	136000000	90200000	59900000	74900000	875000	101000000	138000000	77000000	70000000	126000000	112000000
TLADYNIQK	32300000	35900000	40600000	25900000	32600000	38000000	52200000	50800000	56000000	34500000	23300000	17100000	2320000	20100000	1220000	30300000	806000	10800000	11600000	20500000	7670000	20800000	20900000	26600000	NA	24400000	21300000	35900000	27700000	37800000	28700000	20800000	15700000	29900000	20100000	37900000
AGENIGALLR	0	0	21400	778000	2570000	0	2890000	2550000	0	3650000	5090000	8660	44200	0	0	64000	0	0	NA	107000	0	822000	442000	1970000	927000	0	0	1530000	35800	0	3300000	0	55800	1340000	274000	224000
AFDEIQEK	455000	687000	102000	0	168000	226000	119000	1220000	50000	362000	732000	666000	169000	34500	269000	48700	368000	471000	798000	1330000	523000	3510000	2620000	7330000	3920000	5100000	5020000	40900	7530000	3820000	13000000	12700000	6050000	302000	7490000	1140000
DTQDIDGLTGGAK	145000	48200	93700	0	73500	444000	27300	160000	315000	170000	131000	473000	373000	144000	413000	65900	324000	68200	855000	564000	186000	1420000	1740000	2220000	193000	135000	201000	148000	4770000	1260000	7930000	7800000	0	1550000	4890000	1110000
TGFPTTLQPNIEPNPGGFIR	72000	0	12200000	164000	0	7510000	39700	9110	0	139000	0	570000	0	0	437000	0	0	0	0	2210000	3680000	9480000	0	6790000	0	0	548000	0	3460000	4830000	17300000	6460000	0	0	3210	28500
AYDEIDGAPEER	7850000	43900	1090000	1420000	2760000	5510000	1700000	1980000	681000	4650000	5980000	1300000	3700000	356000	180000	2880000	2960000	6840000	11000000	5290000	5710000	1120000	993000	2010000	2930000	1830000	2260000	2740000	282000	2130000	1520000	1650000	444000	1390000	3800000	1490000
DVDFVIPANDDASK	2390000	199000	1740000	1430000	928000	3980000	3540000	3210000	3060000	227000	3950	5320000	2930000	37600	179000	6100000	18500000	11100000	141000	8680000	7330000	8170000	134000	266000	658000	8390000	4410000	4750000	11000000	10200000	238000	7870000	36600	5140000	188000	13900000
LTEQTGVIGEK	9470000	20000000	19800000	11700000	17300000	9250000	25900000	21000000	25600000	4790000	5940000	8890000	10100000	11500000	8630000	12500000	12900000	7680000	7070000	7960000	2270000	6330000	4730000	4130000	6930000	2560000	1860000	6910000	7350000	6000000	9110000	4550000	9630000	3050000	15700000	9300000
SLNEGFSGGEK	30100000	0	10500000	15600000	9880000	13100000	108000	11900000	12700000	9970000	11900000	197000	12000000	7960000	7680000	204000	48000	13500000	287000	4270000	585000	10700000	9180000	13900000	13600000	17800000	12200000	8270000	17800000	12300000	22900000	21200000	13400000	12200000	16300000	14500000
GYVIPEDVR	12700000	18300000	40900000	11700000	37100000	NA	23100000	8110000	20400000	8190000	12500000	10500000	17000000	33200000	21300000	NA	NA	NA	18600000	NA	8680000	15200000	6710000	8570000	11500000	NA	12000000	14600000	12300000	28200000	15800000	NA	36600000	14500000	NA	8350000
LNNCPTSPR	47900000	38800000	24100000	44900000	33000000	37800000	18400000	241000	25600000	35400000	37800000	47200000	21200000	358000	27100000	19100000	2210000	73500000	54100000	38800000	37200000	37400000	25900000	34500000	40100000	44600000	44200000	26400000	42500000	10900000	16200000	32600000	15200000	42400000	72300000	74000000
IPLSTFR	37000000	112000000	192000	426000	92200000	393000	75800000	96500000	9810000	38200000	42000000	41100000	67500000	903000	53800000	104000000	826000	1330000	80600	92800	50700	52600000	51500000	37800000	52900000	290000	304000	45400000	64900000	57500000	239000	25400000	55000000	47100000	90200000	70500000
LVEILER	9610000	12200000	4550000	7710000	34800000	82700000	21400000	30500000	39700000	6670000	71100000	10300000	50200000	4080000	11400000	1270000	72700000	75800000	92200000	54400000	74000000	10500000	40400000	78300000	2960000	59100000	15800000	14000000	88100000	61400000	49200000	56800000	386000	56400000	71100000	8870000
YAGSTELPR	4560000	2840000	1230000	262000	847000	NA	1670000	NA	295000	1190000	2440000	3810000	19600000	24900000	135000	1080000	190000	12000000	8150000	3100000	1750000	6670000	4140000	3460000	2780000	NA	5590000	3200000	5880000	4040000	6570000	6820000	2640000	3720000	9190000	7590000
FGFTNINR	29300000	67300000	48900000	29400000	38800000	0	52300000	46200000	0	26100000	25000000	22100000	29700000	38500000	0	37700000	0	1860000	26700000	21200000	0	20000000	17300000	15900000	21300000	0	4150000	16700000	0	17400000	0	0	12100000	18500000	0	16100000
IATDPFVGR	42500000	75300000	31900000	78600000	50100000	22200000	257000	33300000	39800000	29800000	38500000	61900	1480000	283000	310000	67600000	44800000	48400000	3430000	25900000	18300000	646000	34500000	42700000	328000	35700000	26000000	556000	66900000	41500000	37400000	33900000	50500000	1900000	66100000	46600000
LDAGSYVLNNR	28900000	61200000	311000	41500000	43500000	29600000	29100000	36900000	25000000	21700000	28600000	32400000	45100000	27100000	31000000	34400000	46800000	42600000	64900000	29400000	34400000	48000000	46600000	37400000	48600000	36800000	1600000	48400000	60500000	29100000	35000000	22800000	43900000	51000000	59000000	46100000
TGDTLSAEK	239000	140000	62400	95100	284000	261000	543000	358000	NA	472000	251000	107000	253000	102000	2650000	419000	8150000	121000	184000	140000	116000	291000	225000	132000	420000	582000	69200	329000	78400	41200	271000	810000	0	119000	710000	258000
LAEEDPTFQVK	15500000	1490000	4840000	8450000	7120000	26000000	997000	714000	13500000	2800000	257000	1320000	10400000	279000	1190000	632000	22100000	21500000	1730000	9930000	8500000	5840000	8640000	7620000	1560000	14100000	5180000	650000	11000000	6290000	16900000	NA	890000	5950000	20600000	13700000
VEVNQGQPQVEYK	2690000	580000	207000	965000	1380000	558000	847000	2570000	134000	682000	2310000	416000	2980000	0	34500	2060000	290000	490000	2640000	1340000	902000	2090000	1010000	1610000	3550000	506000	524000	2710000	1530000	1930000	3210000	2310000	1490000	1100000	5010000	2730000
EYVPAVEK	4640000	3170000	1410000	3320000	1570000	3540000	2710000	2200000	3000000	2650000	4860000	4440000	3170000	132000	591000	5190000	11500000	8330000	14000000	5290000	8520000	8000000	5930000	5890000	6940000	6820000	7150000	5030000	10400000	4430000	10500000	8480000	7540000	5280000	14400000	10600000
SYDYNLVDK	22600000	52300000	26600000	31700000	13200000	24900000	26200000	24900000	26600000	14300000	19100000	15500000	938000	9900000	582000	24100000	29100000	23500000	26300000	7290000	16500000	14900000	12100000	526000	15300000	17800000	8750000	705000	21100000	18900000	19500000	11500000	18300000	235000	24400000	16400000
LLDIYSSSSK	151000000	147000000	83400000	143000000	72500000	115000000	100000000	87000000	76100000	103000000	119000000	61200000	81900000	70100000	63900000	103000000	126000000	102000000	172000000	70000000	70200000	117000000	93500000	96400000	93500000	79000000	90600000	77100000	105000000	78400000	121000000	86400000	78600000	104000000	108000000	95200000
APGSIGAASYPAR	77900000	68200000	44900000	53700000	46600000	58000000	43600000	42600000	35200000	33700000	40200000	38500000	38000000	17400000	33200000	42800000	55800000	65900000	66700000	47600000	44400000	40500000	47100000	37900000	42600000	33600000	32400000	31100000	44200000	22600000	38200000	30500000	20700000	43000000	76500000	61500000
LGEFSPTR	412000000	254000000	78600000	155000000	597000	287000000	148000000	123000000	120000000	213000000	233000000	24400000	131000000	120000000	94700000	146000000	234000000	265000000	394000000	196000000	215000000	6890000	175000000	232000000	222000000	232000000	235000000	159000000	262000000	179000000	274000000	319000000	432000	6120000	342000000	291000000
YSNALYVVR	0	0	308000	0	122000	0	564000	189000	28800	179000	135000	0	56400	74300	0	294000	0	43600	301000	113000	0	2070000	249000	1590000	995000	0	0	293000	73600	195000	0	71100	591000	2010000	269000	0
SQGAVSTAPTVTR	825000	1750000	7070000	1170000	8090000	1970000	6190000	13000000	11200000	1150000	236000	41600	9130000	7590000	6070000	7500000	2750000	1090000	2570000	3980000	1090000	5250000	3780000	3130000	290000	1200000	1360000	4270000	7470000	3020000	2820000	3630000	3650000	1950000	5210000	4350000
ELIIGDR	667000000	522000000	270000000	535000000	497000000	254000000	433000000	406000000	372000000	447000000	5670000	490000000	537000000	332000000	5160000	2360000	375000000	430000000	2670000	246000000	144000000	383000000	318000000	453000000	415000000	281000000	283000000	653000000	348000000	613000000	285000000	397000000	421000000	477000000	559000000	433000000
VILPVIR	24000000	998000	27400000	14400000	25300000	9770000	44100000	21000000	22800000	23900000	49100000	52700000	29800000	4630000	11000000	47900000	22800000	17800000	106000000	5200000	12400000	54200000	17600000	31000000	38000000	16400000	5060000	25100000	3410000	4590000	23300000	6890000	26500000	22400000	72400000	71600000
TAGGLYIPESAK	19900000	5330000	671000	2950000	3230000	1080000	4770000	4440000	1490000	4810000	10500000	5970000	1700000	1240000	1190000	2060000	896000	2280000	20100000	NA	1510000	719000	2560000	1050000	NA	1210000	869000	1160000	774000	1440000	1850000	2960000	3160000	NA	6000000	3640000
ALYDLQLIDSR	241000	NA	1630000	547000	1590000	59600	1180000	207000	0	11800000	14200000	17000000	181000	37800	2770000	5600000	0	0	NA	690000	0	22800000	435000	18600000	NA	0	0	NA	0	984000	21800000	906000	2600000	19700000	1780000	8060000
NGLAIVPIER	2940000	7920000	1880000	4070000	3420000	5730000	4210000	4000000	314000	2560000	6680000	6660000	3970000	2890000	0	6560000	474000	782000	13900000	8670000	28300	15000000	5330000	8110000	9690000	941000	1310000	8140000	14200000	4710000	14300000	11200000	6450000	9220000	9490000	10500000
GALLVGPPGTGK	934000	1990000	55600000	1520000	65300000	91100000	62700000	59600000	51600000	69100000	80700000	2640000	54000000	37200000	1170000	1970000	94200000	74500000	1710000	55000000	58200000	73700000	190000	60700000	52800000	60800000	39900000	51500000	72900000	35600000	61500000	89300000	37100000	66000000	63600000	58200000
QDFLDAVDR	281000	1330000	655000	308000	943000	36500	1460000	602000	32900	256000	559000	1380000	258000	751000	0	676000	0	50400	1820000	143000	28400	838000	166000	1070000	982000	0	0	552000	866000	297000	824000	348000	1150000	1540000	134000	582000
ISTGALSDLEK	11000000	10400000	4140000	6820000	6710000	10100000	1400000	8130000	2910000	7160000	145000	7480000	6390000	3570000	4710000	9310000	548000	13300000	17800000	10900000	9280000	3170000	6320000	9750000	11600000	9900000	3970000	4100000	8940000	6230000	11600000	8560000	12100000	7230000	12000000	12500000
AYNTVSPASGK	13800	91500	24000	0	17600	105000	29100	447000	28800	102000	154000	280000	681000	208000	282000	18800	754000	50600	585000	140000	35900	193000	95900	47200	55000	300000	141000	529000	192000	0	621000	1220000	182000	0	1280000	577000
AILGINPGSEQVR	222000	81400	0	885000	3260000	225000	3810000	36100	0	2320000	4390000	3080000	0	0	0	305000	35400	0	9990000	177000	104000	15700	835000	41500	86300	113000	183000	70700	1810000	48500	7600000	8590000	2530000	657000	3160000	2350000
EGDTGSPEVQVAILSSR	0	0	29300	61900	288000	6660000	1960000	1400000	745000	1530000	2470000	93400	2860	0	0	489000	8060000	1440000	10600000	237000	824000	2700000	0	2430000	3370000	1560000	0	1500000	195000	279000	3790000	3160000	2630000	140000	0	341000
VNAIYSGNYDDTR	4220000	2410000	2290000	3500000	1690000	352000	9500000	8410000	6270000	4420000	3730000	4580000	570000	3420000	365000	2350000	4840000	NA	3090000	3920000	NA	3660000	65000	2470000	4240000	4270000	1200000	3300000	1570000	4900000	4830000	1150000	2800000	3150000	3310000	2200000
STIVAYYNK	24300000	1160000	31800000	30400000	36100000	NA	74600000	57600000	NA	18700000	32800000	7120000	909000	602000	745000	1650000	1390000	12800000	19800000	NA	1010000	15900000	13600000	34400000	NA	1290000	2840000	5440000	23800000	43700000	29800000	23100000	32000000	21500000	18500000	15800000
LGSPTGGGNFYLFK	0	378000	2520000	73000	5160000	0	14500000	14400000	0	4940000	8760000	1190000	1870000	1870000	353000	NA	15200	28200	2430000	0	0	2520000	1460000	4400000	6670000	0	0	769000	0	0	971000	21600	819000	5620000	131000	200000
DGLNNAIQSALTGAK	54800	165000	158000	0	164000	26400	4380000	3620000	0	105000	65600	3430000	294000	33900	0	101000	0	0	131000	314000	0	22800	47400	247000	175000	0	0	28000	48400	86200	197000	169000	0	127000	84500	18500
SIPEDVAFAESR	658000	22000	1080000	809000	1560000	355000	42400	609000	1130000	972000	1060000	1680000	1260000	0	510000	838000	51300	381000	3310000	656000	812000	1110000	147000	1540000	3740000	835000	108000	501000	1020000	377000	1820000	5650000	1250000	1590000	553000	1150000
TTEGSFEAPTNTK	3540000	868000	2120000	589000	3660000	3980000	2180000	2410000	200000	1360000	2170000	627000	3700000	139000	18600	6020000	504000	195000	5920000	11600000	1130000	5480000	1170000	2610000	3050000	1310000	615000	3260000	8730000	2200000	2760000	3530000	112000	2290000	6180000	9060000
AVLADIQNGK	25200000	931000	3280000	14600000	7750000	21900000	7550000	10800000	2280000	19100000	22600000	337000	756000	7370000	6810000	9810000	363000	23400000	178000	18600000	12300000	15700000	16900000	30300000	24900000	20100000	1640000	18100000	23500000	229000	30000000	27900000	30100000	19200000	24200000	21700000
VSIDDNALFR	1400000	0	2310000	0	3180000	25900	2890000	1690000	0	2730000	1720000	128000	2280000	702000	336000	223000	0	0	852000	0	0	396000	159000	624000	366000	0	0	288000	510000	215000	564000	450000	444000	270000	0	433000
VAQGVVDAYK	3520000	266000	166000	2810000	6960000	45200	4920000	5660000	37500	401000	1870000	2340000	781000	40100	292000	NA	0	2820000	2760000	2960000	59200	2030000	967	3020000	3670000	399000	985000	4160000	4730000	1790000	3310000	2880000	4260000	3230000	5640000	3210000
VVDGLGNPIDGK	1960000	3640000	1300000	4180000	1090000	3600000	5000000	3440000	NA	2960000	3150000	575000	2440000	1030000	412000	NA	1100000	6850000	8690000	3080000	1530000	NA	2040000	NA	3460000	471000	1770000	3630000	2410000	4650000	NA	6960000	8780000	1510000	6890000	5050000
SIDSLIPIGR	14400000	0	21200000	6350000	20000000	28400	32800000	25800000	0	29700000	27600000	21500000	17500000	0	10700000	2040000	2950000	578000	5620000	5520000	1830000	5590000	259000	1810000	1750000	42800	220000	1170000	590000	698000	4830000	3550000	697000	1230000	394000	2680000
AGLQFPVGR	1790000000	1700000000	1060000000	1210000000	1250000000	2720000000	1550000000	9660000	723000000	2300000000	2540000000	1630000000	1130000000	852000000	579000	1670000000	13200000	920000000	4250000	721000	889000000	1040000	881000000	2030000000	1420000000	3330000	4460000	1580000000	2360000	1270000000	1770000000	1980000000	838000000	1680000000	1050000000	1810000000
STGSYSLVTQQPLGGK	8000000	7200000	2450000	1630000	3960000	6420000	5160000	4030000	3830000	4040000	5170000	3630000	6150000	3230000	0	1870000	1650000	4110000	7630000	1220000	2660000	2080000	864000	3610000	5330000	4260000	123000	3730000	1940000	2550000	4380000	4570000	4380000	265000	4470000	3140000
EIVAIQGGQCGNQIGAK	2380000	4070000	1670000	1230000	3150000	3590000	2170000	2220000	4410000	3610000	4850000	6820000	2490000	669000	50500	155000	537000	3860000	104000	2090000	1110000	2130000	243000	2990000	3130000	416000	455000	1960000	463000	29900	2190000	6470000	1450000	1820000	527000	2770000
INVYYNEATGGR	540000000	550000000	344000000	204000000	651000000	1040000000	757000000	742000000	965000000	812000000	1030000000	1000000000	1100000000	499000000	561000000	528000000	911000000	743000000	699000000	659000000	666000000	599000000	331000000	516000000	674000000	375000000	282000000	473000000	230000000	340000000	629000000	439000000	299000000	359000000	219000000	334000000
IALTSNAAPTDAQR	2110000	2580000	2420000	716000	2810000	1860000	1790000	3510000	3050000	622000	133000	1720000	1780000	1520000	1070000	5890000	1810000	2690000	1630000	3350000	1460000	747000	2630000	3170000	5240000	1730000	1660000	7180000	8470000	5780000	2870000	1230000	2710000	9790000	8650000	7540000
TAGGIIIPDSAK	111000000	59900000	16200000	48100000	24500000	107000000	53400000	43100000	52300000	102000000	104000000	59700000	47200000	547000	229000	52000000	2580000	144000000	200000000	82400000	86000000	72400000	60400000	106000000	103000000	105000000	61800000	58300000	52600000	56300000	121000000	200000000	108000000	37700000	140000000	107000000
VIDLIEPYAK	0	102000000	0	53900000	64600000	77200000	90300000	86200000	23100000	61600000	61700000	0	62100000	58100000	55000000	56000000	298000	52700000	91100000	56200000	0	0	41500000	1140000	62200000	0	0	42500000	57500000	42300000	77300000	0	52200000	46900000	58200000	49600000
VNVVQATIADVR	0	6610000	3060000	79100	5420000	0	6140000	892000	0	9770000	NA	NA	3500000	2970000	920000	2370000	0	1420000	26700000	517000	274000	NA	5660000	NA	NA	0	0	8520000	0	0	103000	61200	17300000	12700000	1820000	4800000
GSGVPVIADGGIR	3040000	5670000	5490000	1630000	6900000	71500	29700	7380000	75700	1380000	2920000	2390000	5380000	5680000	0	5560000	86300	97100	3370000	3010000	0	5210000	1500000	4870000	5650000	359000	661000	3580000	4390000	66200	4180000	1900000	3630000	2800000	3670000	5030000
LVPEGIVGR	33800000	38900000	16500000	27100000	17400000	NA	23700000	22200000	15200000	25700000	26100000	21400000	19800000	379000	598000	24700000	NA	30600000	32300000	NA	20000000	31900000	15600000	22700000	26900000	23800000	17600000	20600000	29400000	17100000	23600000	29300000	27900000	25900000	27000000	26000000
VVEIPASNLK	10200000	425000	24300000	8800000	797000	NA	13600000	766000	23700000	4080000	2570000	498000	226000	23800	642000	1590000	1620000	4180000	530000	3410000	49600	7930000	8540000	6380000	278000	694000	1630000	4480000	4980000	1960000	1410000	370000	309000	7300000	7590000	3980000
FAPLNSWPDNGNLDK	1940000	5470000	4090000	NA	3030000	5270000	3140000	4210000	636000	5860000	7610000	5880000	5370000	2660000	52100	3730000	142000	6640000	7020000	5240000	3740000	7460000	1350000	5220000	6070000	5880000	2210000	3330000	6320000	4770000	7300000	7730000	2500000	5350000	3110000	4510000
SGTLTYEAVK	34000000	29700000	14800000	21700000	15200000	24700000	19700000	19500000	1920000	9010000	14100000	19400000	1410000	373000	134000	12500000	1450000	NA	24200000	16000000	2520000	11300000	14600000	17800000	17000000	19500000	5490000	10800000	1410000	14900000	22500000	27000000	8700000	2910000	30800000	16400000
GWTLVDPGSAAGLDGSIAK	71200	592000	5160000	290000	2640000	4200000	12500000	5890000	29000	7430000	4780000	9630000	9120000	1400	0	2030000	95500	7980	547000	5810000	129000	6100000	0	21200000	13400000	57100	0	4960000	234000	9450000	28800000	16600000	3850000	10400000	19500	1600000
AGGQGLILGR	16700000	10800000	6840000	5410000	6340000	1570000	8020000	NA	1980000	6810000	1870000	1350000	1740000	2420000	1800000	1830000	1000000	4810000	2070000	NA	1430000	12600000	10300000	18400000	2530000	1700000	4210000	4470000	16600000	6020000	NA	NA	20600000	9230000	18200000	11100000
GIGTGLYK	5240000	824000	4380000	1060000	6430000	1340000	6680000	9870000	958000	1230000	6740000	1240000	1810000	1460000	505000	2310000	20500000	701000	5860000	5950000	366000	8280000	168000	16700000	7270000	448000	6360000	7400000	24600000	9270000	16800000	22200000	23700000	8770000	8420000	2370000
FQELLLTAR	64500	195000	7990000	443000	17000000	262000	16700000	15900000	0	7700000	9130000	499000	22800000	519000	29800	NA	0	0	205000	427000	0	14900000	2730000	18600000	39500000	0	0	12200000	3060000	1260000	31300000	2100000	41300000	16700000	29600	837000
ALITAPNASDLAR	488000	0	300000	0	30400	189000	55300	39100	620000	1230000	213000	67400	81600	0	86200	38400	884000	1590000	18900	263000	2340000	1180000	826000	2830000	51800	2510000	212000	58800	1480000	676000	1620000	5240000	2260000	17300	382000	1940000
IIDLVAPIGK	11500000	10000000	4450000	6770000	7370000	867000	11100000	7510000	6940000	11400000	14300000	6940000	10300000	4710000	366000	10800000	32800	216000	22900000	7420000	77900	15000000	6890000	322000	16800000	547000	3950000	11000000	421000	3950000	20200000	25900000	14300000	11600000	16700000	14500000
SLIVAPPR	23400000	3090000	6870000	13700000	247000	23300000	13900000	5410000	14500000	258000	6290000	5480000	369000	15600000	3560000	10900000	3190000	23500000	24200000	19200000	17500000	289000	10900000	17800000	1640000	26900000	118000	13800000	15600000	18600000	21700000	44900000	16300000	510000	26100000	1960000
GEVVSSTFDEPATR	1400000	7060000	167000	312000	641000	1240000	678000	150000	815000	1090000	1290000	4240000	1180000	93200	101000	256000	710000	649000	197000	134000	785000	417000	315000	863000	1340000	826000	116000	612000	288000	100000	843000	704000	398000	393000	1730000	424000
AFNTVVPSSGK	21900000	17000000	12400000	19600000	15000000	17300000	16900000	15200000	17900000	19200000	15600000	14300000	15900000	13600000	9740000	15300000	24000000	21300000	26500000	17600000	19800000	17100000	11400000	23700000	16800000	22000000	14600000	13400000	17000000	15100000	21300000	22000000	16200000	12500000	27900000	21700000
LAFYDYIGNNPAK	551000	28600000	8190000	7200000	16200000	964000	38600000	25900000	2100000	23300000	35500000	40700000	21400000	4150000	4800000	18400000	261000	2780000	18900000	16700000	1470000	24500000	2030000	13100000	26500000	624000	1040000	32600000	7350000	23100000	27200000	15000000	4290000	36500000	431000	6340000
TSLESDGVFR	7850000	1410000	25300000	20000000	1620000	656000	22700000	26400000	1630000	13300000	11700000	1170000	1470000	226000	527000	1500000	378000	2400000	1230000	3800000	507000	15300000	6920000	4810000	10100000	855000	4050000	2160000	6000000	NA	7700000	4130000	4190000	26600000	8450000	3510000
LTNPTVAVLEQR	551000	9030	5080000	5830000	37600	72100	43400	0	29800	4900000	7200000	9170000	0	0	0	9250000	34600	124000	12100000	0	1610000	7990000	6110000	37500	12400000	3420000	991000	24200	5950000	1050000	10300000	350000	281000	9420000	7580000	6170000
GVLLVGPPGTGK	9630000	6630000	2130000	4690000	9660000	286000	359000	8360000	803000	5860000	1530000	8120000	7080000	5400000	5580000	4960000	236000	152000	8650000	1930000	355000	7110000	2320000	699000	NA	289000	274000	21100000	733000	404000	8870000	9760000	5080000	3910000	7970000	5490000
IVVLGSGPNR	7360000	21900000	10600000	16000000	8230000	NA	1800000	3720000	1880000	6260000	12600000	13800000	14100000	11100000	1860000	15400000	1880000	1200000	19900000	1200000	1950000	17100000	12800000	690000	10900000	NA	2790000	15700000	2350000	3700000	16300000	11700000	11700000	15400000	13700000	4160000
VLYEPSDDFR	21000000	12700000	11600000	6310000	10000000	7980000	7870000	12800000	4200000	5430000	7950000	6040000	6040000	5910000	2550000	7780000	15500000	NA	11800000	9280000	5450000	8880000	5510000	7770000	10300000	4140000	727000	4300000	8010000	2180000	3920000	9770000	5950000	6250000	7490000	5530000
VVEIYGPESSGK	18000000	304000	13200000	7230000	12500000	13500000	20200000	15500000	14600000	8110000	9350000	8390000	13600000	10600000	6830000	6760000	4850000	7580000	16500000	8690000	5790000	5750000	6610000	9680000	10400000	10400000	2060000	6160000	4050000	6940000	10000000	12400000	12400000	3760000	11700000	8600000
GVVGLPNGTGK	55700000	43700000	14100000	50600000	15900000	40000000	27700000	18800000	19300000	42500000	36500000	191000	77500	15200000	2150000	19900000	41100000	47700000	66100000	25400000	31600000	27200000	24300000	33700000	27900000	34100000	37200000	1180000	35400000	25600000	38000000	43300000	28500000	17600000	47400000	35400000
AGQANPSPPVGPALGQR	4690000	2720000	2050000	623000	3330000	7640000	6280000	5720000	3900000	5770000	8160000	3640000	5510000	2640000	0	2520000	6000000	5760000	8690000	5150000	1360000	3870000	2490000	5240000	5920000	6270000	380000	3430000	1990000	958000	5720000	6590000	2090000	2560000	5710000	5670000
TPPASYYLK	6030000	930000	305000	6930000	8530000	745000	7540000	8660000	2230000	8500000	4400000	1950000	658000	1300000	2250000	4490000	485000	465000	10000000	5600000	787000	1360000	9000000	5370000	2970000	1130000	5290000	844000	NA	1130000	9100000	7990000	9030000	6610000	NA	9800000
VQEGEEAPR	186000	1530000	3540000	0	39000	6270000	32600	65500	77500	129000	733000	191000	3930000	4150000	4140000	NA	1330000	4010	696000	479000	605000	5160000	3260000	614000	59100	772000	410000	509000	110000	3680000	2660000	2550000	241000	48600	316000	947000
AYDQIDGAPEEK	11000000	456000	1200000	4240000	6040000	8630000	5750000	3110000	2780000	8620000	10600000	9950000	8190000	3840000	237000	4230000	5470000	12500000	12700000	8620000	8040000	4200000	2170000	4060000	7150000	1590000	1540000	2440000	660000	5070000	4920000	5030000	3060000	2080000	6240000	4870000
GEAGDNIGALLR	3460000	667000	11400000	6740000	26300000	252000	33700000	1010000	21200	19500000	21800000	501000	17600000	1220000	1560000	NA	0	0	21700000	892000	18600	28100000	15100000	20600000	28700000	0	587000	19600000	7450000	2100000	30000000	3730000	22500000	22800000	23900000	NA
GIYPAVDPLGSTSR	69500000	1700000	36100000	29000000	44300000	103000000	94900000	62400000	82100000	74600000	56600000	58300000	94000000	991000	646000	35100000	10900000	101000000	2240000	59400000	47800000	636000	39000000	110000000	110000000	145000000	15100000	156000	19100000	39400000	5730000	174000000	86800000	27200000	101000000	67800000
VATDVQQVLQR	39900000	45600000	18300000	23800000	25300000	44200000	36800000	28100000	32200000	34900000	30900000	18600000	31400000	20800000	19900000	13600000	26400000	33500000	46100000	15800000	27600000	14000000	13300000	33500000	33600000	38600000	5410000	13800000	3840000	4630000	36100000	39400000	26200000	9310000	26000000	18100000
FLSQPFDVAK	58700000	1370000	46200000	97000000	76900000	66900000	73100000	73200000	58400000	88700000	110000000	16200000	2970000	927000	1600000	72100000	4450000	127000000	148000000	7210000	82100000	91100000	52600000	100000000	67300000	95600000	5890000	67200000	55900000	77100000	4320000	4030000	1540000	62500000	91100000	73600000
QVPLEDTIK	60500000	61000000	20000000	63300000	16800000	35000000	28500000	19200000	16200000	30000000	35600000	29000000	29200000	13400000	16300000	27100000	30400000	39200000	42500000	10200000	2150000	25200000	25000000	48800000	30600000	36100000	23500000	19200000	20700000	16900000	29700000	33600000	20300000	21200000	41800000	26500000
VNIIPAAPGTGVIAGGAVR	95000	13200000	8210000	5200000	9340000	470000	6290000	5790000	9740000	8620000	9480000	10700000	12100000	8850000	5530000	7400000	10400000	9980000	14000000	5810000	12000000	11800000	3660000	13000000	14900000	12400000	0	8090000	5930000	193000	15000000	7480000	5340000	10200000	1840000	3800000
GVDALANAVK	864000	808000	269000	56200000	93200	72300000	1020000	18400000	20600000	76000	2720000	147000	19100000	16900000	448000	45100000	66200000	65300000	91200000	42800000	44900000	57800000	409000	178000	211000	58100000	2260000	36900000	784000	41500000	64000000	75500000	441000	351000	435000	49800000
VGDTVLYGK	21500000	9710000	3440000	11400000	3690000	NA	6780000	5740000	3550000	4950000	10600000	9030000	915000	2400000	3160000	7150000	2420000	4020000	12600000	2410000	1910000	6520000	7250000	14600000	11900000	3040000	4740000	4070000	10900000	13900000	7070000	8150000	9020000	7450000	11900000	11200000
NLVIVESPAK	10300000	8170000	2430000	1550000	4590000	8020000	4600000	2090000	6070000	7420000	4600000	4090000	4150000	1230000	2170000	2630000	2410000	2860000	7980000	5750000	3080000	4080000	3380000	NA	4220000	5160000	4250000	4400000	1430000	3160000	5400000	5040000	9030000	6210000	9770000	6240000
FTLNIDGK	24500000	100000000	84000000	918000	76400000	84300000	102000000	116000000	2920000	89100000	345000	94000000	94200000	53900000	243000	104000000	877000	34500000	81900000	67800000	39000000	70700000	26200000	619000	79100000	824000	821000	31800000	610000	33600000	53600000	496000	19600000	2330000	18500000	32700000
TTIDSGAELFAR	487000	46000000	36100000	2710000	35500000	1140000	NA	NA	2840000	31100000	59200000	30700000	46200000	31300000	0	40800000	429000	NA	12400000	2250000	5650000	59100000	2500000	10100000	NA	91300	1120000	10200000	4170000	1390000	12400000	7470000	10400000	28600000	1740000	3830000
CPFTGNVSIR	5070000	3330000	15600000	1290000	16000000	18500	NA	15300000	134000	3450000	9550000	11100000	3390000	1230000	9930	5940000	171000	132000	2550000	1090000	1550	NA	2960000	1370000	2530000	34200	0	11300000	NA	0	NA	2970000	524000	NA	639000	NA
AIDALDEAGSR	2100000	2380000	1450000	1320000	1480000	1730000	1890000	717000	30300	521000	1180000	2190000	154000	599000	103000	1700000	265000	1530000	1450000	1550000	1180000	1450000	1220000	887000	1330000	995000	456000	942000	2000000	1010000	1310000	861000	2580000	2190000	3260000	1630000
AGVVADLAYGPK	30000000	84400000	79600000	5430000	46700000	NA	78300000	60600000	2030000	16200000	15300000	17200000	31500000	28600000	2840000	17100000	1390000	4010000	23200000	1530000	3890000	8520000	3120000	3700000	13000000	2430000	2200000	3020000	954000	2060000	4560000	4640000	2240000	1570000	1560000	5180000
EAALQIADPQVR	12600000	573000	6100000	2450000	1260000	7610000	128000	992000	NA	6400000	NA	2400000	994000	36300	551000	249000	2270000	1720000	1230000	16200000	19400000	NA	5900000	1520000	976000	15200000	2670000	14100000	4660000	950000	25900000	44100000	1040000	12100000	4170000	7210000
CTGYQNIVK	999000	1510000	219000	1250000	611000	862000	1430000	856000	656000	1160000	996000	802000	149000	177000	1020000	1230000	166000	1190000	849000	547000	932000	1190000	695000	558000	678000	1080000	481000	681000	1140000	1180000	879000	3630000	1740000	0	221000	1830000
SFNEAAFNGAER	3870000	3470000	414000	796000	2810000	278000	6880000	5860000	1040000	6430000	7900000	7570000	113000	39900	75800	3970000	191000	157000	3600000	863000	141000	222000	3680000	6650000	9210000	227000	2910000	6920000	9330000	68100	16300000	341000	9870000	7270000	5840000	9250000
FATSDLNDLYR	28600000	87900000	73700000	67800000	70300000	76300000	69000000	75100000	718000	54900000	60500000	64800000	65100000	43900000	41600000	101000000	41400	68800000	105000000	48800000	60400000	81300000	51800000	77700000	86700000	68200000	36800000	57700000	95700000	49700000	85700000	53200000	45500000	91700000	56600000	72000000
APEVILR	88800000	101000000	69400000	50300000	3330000	91600000	69000000	64000000	78400000	76200000	76800000	69400000	55200000	46200000	43100000	90500000	42900000	91800000	108000000	63700000	58500000	73100000	68700000	5640000	68600000	62200000	55600000	69800000	112000000	68800000	62100000	51100000	50600000	86600000	126000000	104000000
LGIQAFQPK	154000	440000	1310000	27200000	426000	50900000	35100000	40300000	33700000	31200000	1160000	1420000	25400000	782000	19600000	1340000	1200000	41600000	291000	40200000	29700000	39000000	28100000	33600000	35400000	25300000	2490000	1800000	37600000	19700000	434000	286000	1730000	36900000	44600000	378000
FDAANVER	98500000	44100000	34900000	21700000	52000000	58500000	88500000	74300000	73900000	81400000	47400000	91500000	79900000	36700000	34000000	33900000	2610000	108000000	115000000	103000000	96100000	79100000	43800000	84800000	54300000	39600000	66700000	20900000	82700000	25900000	76000000	61000000	48900000	23600000	79800000	110000000
SAADTGAGSTGPGIAER	540000	90000	108000	250000	493000	368000	1050000	1500000	282000	974000	208000	860000	1220000	75000	0	664000	1380000	1270000	1010000	692000	318000	685000	0	NA	1810000	787000	192000	1380000	2060000	1900000	373000	1110000	860000	991000	573000	212000
TTEINNEYDVLGK	4010000	2280000	1920000	848000	1680000	1900000	1650000	1480000	3070000	NA	313000	1360000	2100000	1240000	384000	3870000	2310000	1530000	1050000	1050000	1240000	1130000	779000	3110000	602000	5150000	913000	2200000	1860000	1010000	1990000	NA	2200000	2550000	1380000	494000
TSGGLIIPDSAK	62600000	31200000	10800000	29000000	15700000	55100000	30500000	26500000	32300000	55500000	60200000	35500000	28000000	22700000	29200000	33000000	80700000	84400000	86800000	46200000	41900000	41200000	35800000	61900000	65900000	78900000	36600000	31200000	45300000	34800000	68500000	101000000	78000000	21100000	81400000	67100000
VIYPVETPLTK	8080000	948000	2850000	4380000	888000	1300000	1210000	2520000	1670000	8930000	1450000	1360000	2160000	720000	1740000	1540000	14600000	3330000	3510000	9600000	9560000	12100000	10000000	1410000	2020000	17700000	4160000	721000	15200000	3150000	19600000	39000000	14400000	4720000	804000	NA
VALITDGR	788000000	232000000	229000000	266000000	403000000	154000000	1220000	76100000	39400000	423000000	45800000	21400000	66700000	39200000	25100000	2260000	257000	69200000	3480000	334000000	116000000	29700000	48800000	107000000	2880000	169000000	118000000	67800000	856000000	961000000	335000000	216000000	869000000	219000000	828000000	877000000
GVGVTPFTIGTK	924000	548000	938000	319000	2000000	612000	1540000	1990000	447000	426000	433000	804000	4420000	2800000	26200	576000	0	2910000	197000	603000	639000	288000	1410000	NA	1440000	0	521000	1330000	722000	953000	5050000	NA	3740000	2040000	588000	974000
LDAVQADVYK	3350000	2970000	770000	3670000	2680000	5640000	1730000	2080000	3590000	NA	6050000	5270000	2410000	810000	2370000	3530000	9380000	7780000	1280000	5650000	4060000	9430000	955000	17700000	11300000	8730000	3840000	6410000	7000000	7010000	19700000	15500000	1110000	7470000	8480000	10300000
AVGQDTFQPK	33800000	18400000	20400000	9200000	32800000	42700000	25000000	25700000	32500000	25800000	31800000	26400000	26700000	21900000	17500000	42100000	98000000	117000000	97500000	117000000	95400000	67100000	25200000	37900000	39100000	57700000	50000000	16700000	79800000	19000000	33700000	59200000	34300000	12300000	101000000	99000000
NYQGDGDSTYR	5920000	29200	3170000	1770000	2840000	2980000	33400	0	2660000	648000	1530000	0	28300	33900	0	16500	460000	3010000	11500	2340000	0	2610000	1390000	142000	0	0	441000	15600	2440000	175000	407000	2850000	0	3110000	4120000	2950000
SFGGVLVSR	NA	3480000	32400000	NA	16500000	17400000	42800000	11000000	4220000	14600000	8860000	4240000	3920000	7800000	6810000	16200000	0	10700000	13800000	10100000	439000	36500000	5140000	39200000	43300000	28600000	20500000	10900000	36300000	9180000	31200000	35600000	NA	14200000	50100000	NA
SQWLQIR	1870000	3250000	52200000	2200000	89800000	103000000	176000000	93700000	264000	70100000	78200000	77600000	85100000	2130000	116000000	81100000	7000000	810000	84000000	150000	1120000	655000	73500000	179000000	128000000	501000	2470000	65800000	9960000	6370000	5460000	1150000	117000000	88100000	2730000	1220000
ILEVPVGPALQGR	1470000	778000	1230000	1110000	988000	5450000	2270000	1540000	2220000	901000	1650000	1250000	1400000	1220000	481000	1640000	800000	3470000	1370000	NA	NA	7920000	2980000	2060000	2280000	18600000	1790000	175000	5780000	5310000	17200000	14200000	1370000	5410000	339000	6960000
VVDALGNPIDGR	2450000	1280000	164000	1740000	1610000	1130000	319000	1320000	1180000	2790000	1840000	3140000	2180000	1320000	379000	2400000	996000	1060000	3370000	513000	2820000	3860000	4160000	4950000	615000	8110000	1890000	5690000	4130000	2450000	8990000	9940000	5700000	5430000	5400000	6520000
QSVDQPVQIGLK	14800000	5000000	83000	6710000	190000	8240000	289000	305000	675000	5910000	7180000	NA	6170000	7160000	7640000	2800000	106000	616000	11800000	3120000	1060000	5010000	3410000	3500000	3580000	6860000	2220000	1460000	4360000	746000	6010000	2570000	7760000	1520000	2940000	4480000
VNADYVEK	908000	1350000	2710000	230000	11400000	1410000	14500000	4720000	12300000	2120000	855000	937000	904000	6680000	633000	8790000	6550000	11800000	2300000	7520000	5790000	205000	247000	354000	2940000	3900000	428000	1380000	966000	138000	1140000	9550000	71600	2290000	805000	261000
LIDLVSPIGK	1060000	9630000	540000	753000	1730000	8420000	11200000	1150000	0	10000000	12300000	2170000	7530000	4410000	5440000	748000	0	0	9720000	2350000	NA	NA	169000	6450000	7060000	0	1490000	1380000	4520000	1890000	1710000	4150000	2040000	368000	1260000	NA
LGANVASAQGPTGLGK	24200000	16400000	20900000	5400000	30300000	31900000	43200000	33600000	27500000	17400000	29900000	22000000	28900000	21300000	14000000	12200000	18200000	20900000	20600000	18700000	12900000	10900000	12500000	13200000	15700000	9590000	1870000	17300000	5350000	18400000	14000000	20600000	9570000	10000000	12300000	6710000
GSAVNPVLR	39700000	28100000	12200000	3050000	5590000	21900000	NA	14700000	155000	34000000	9450000	1490000	640000	1470000	684000	9180000	866000	4040000	34400000	23800000	521000	21800000	18800000	1840000	27300000	136000	3930000	10100000	2270000	1050000	47800000	51500000	24800000	23500000	2000000	28900000
ADQVQILK	21800000	12300000	26000000	19400000	16100000	NA	18400000	11400000	13500000	10300000	7240000	3870000	6720000	1690000	2380000	27000000	6340000	8620000	10000000	NA	2500000	18100000	18300000	12000000	12700000	NA	5410000	8680000	14700000	2430000	8770000	2520000	10500000	6070000	9750000	14400000
IPYVASPR	111000000	2220000	24800000	24600000	NA	54900000	3540000	23300000	8360000	33600000	42700000	NA	767000	NA	4320000	21100000	3130000	968000	52000000	37700000	12600000	22400000	20800000	3070000	28000000	22800000	10800000	4830000	1960000	5910000	25000000	35300000	32000000	12100000	817000	14100000
DQTPQGQFYCSAGAK	342000	1460000	789000	6200	666000	1230000	788000	1300000	1150000	82700	1320000	4430000	2760000	1010000	1080000	1320000	309000	8040000	6700000	6440000	4590000	4720000	2240000	3220000	7160000	3970000	2780000	2130000	6820000	981000	6280000	10600000	7060000	277000	10300000	16200000
GISYSTSDIQR	13100000	576000	7050000	1700000	5120000	738000	999000	302000	6470000	5340000	2430000	6530000	5340000	1230000	4650000	3700000	985000	13500000	17900000	8830000	4740000	7030000	6350000	8940000	19500000	17000000	8450000	4990000	23600000	6700000	32400000	31300000	9000000	7210000	42900000	23400000
AITDAGATNK	2510000	2310000	876000	1280000	1660000	NA	829000	1210000	2820000	1480000	3170000	3140000	4200000	1540000	192000	2540000	1790000	2620000	3770000	4960000	1260000	3580000	603000	355000	1610000	2330000	422000	2220000	1030000	3630000	1240000	352000	1270000	852000	1270000	1280000
IPEILLDNTDR	1100000	280000	4830000	2020000	6070000	71800	7380000	745000	254000	1500000	3240000	887000	239000	0	55100	97300	99700	79200	4330000	55800	50400	3980000	2150000	85600	5400000	34800	333000	2670000	4160000	197000	5040000	3760000	1190000	3010000	2170000	705000
TSPFAFTGNK	4900000	131000	NA	685000	3360000	443000	6730000	543000	326000	2980000	1510000	199000	1900000	0	0	637000	53300	105000	838000	525000	441000	2890000	2250000	3380000	2030000	486000	192000	337000	411000	66900	568000	2870000	3300000	1900000	2730000	3600000
IVVPFTDGTK	3880000	5680000	314000	4340000	1830000	3240000	4710000	941000	1630000	1700000	1280000	678000	1480000	2580000	684000	6450000	1540000	2260000	399000	2770000	300000	2690000	5220000	5680000	3290000	1330000	4820000	4920000	6810000	3570000	4660000	3700000	4920000	3870000	2690000	6160000
GSCGCTVPEYPK	5720000	4750000	4390000	3420000	2290000	2650000	2640000	1420000	445000	2930000	4770000	8250000	5370000	329000	4690000	1610000	437000	3650000	14500000	15400000	575000	11500000	11300000	12100000	8820000	NA	8980000	6210000	18500000	1970000	6210000	18200000	5500000	568000	14700000	29300000
NTAIAPGATGQIR	3120000	1570000	718000	1490000	1490000	2710000	1220000	1310000	3210000	1090000	3870000	5470000	4050000	2520000	2420000	5290000	4740000	NA	17000000	6850000	1120000	2610000	3340000	2950000	5560000	2770000	3280000	4890000	10600000	4350000	13700000	14000000	821000	1890000	1490000	11100000
TTEGTFEAPTNTK	17800000	5490000	7620000	2830000	19900000	18100000	15300000	13000000	13600000	8330000	4230000	16900000	220000	5030000	5920000	245000	22400000	38300000	27500000	37900000	18600000	19100000	6230000	11500000	8090000	14300000	8220000	9180000	33600000	11300000	8640000	16400000	7440000	9730000	26200000	31600000
IIEIYGPESSGK	12700000	10200000	6540000	6550000	9840000	11200000	13200000	11800000	11800000	11700000	18700000	9170000	14900000	10000000	353000	10200000	6160000	1160000	24800000	NA	11700000	5800000	5080000	12900000	15000000	NA	3230000	6760000	4630000	1820000	12700000	27400000	13400000	5640000	15100000	9430000
VATTLGTSFEK	7430000	3050000	2850000	580000	2790000	402000	3940000	2670000	620000	798000	1850000	2950000	8800000	4430000	4210000	1920000	170000	151000	4240000	3070000	125000	665000	4170000	12400000	8750000	3860000	647000	7750000	6010000	5060000	14800000	21500000	17100000	5800000	5340000	2940000
GYQEVLAGR	94700000	7150000	23700000	69300000	7340000	4000000	52400000	39100000	15700000	140000000	NA	9170000	31500000	1740000	136000	3230000	52400000	NA	19300000	NA	649000	84900000	64700000	89100000	14400000	6380000	71100000	72600000	84900000	98100000	54200000	113000000	93600000	92700000	NA	64500000
LAGELLDAVNSR	8390000	20600000	9360000	13300000	12800000	38300000	20600000	22600000	19600000	29100000	52900000	36200000	30900000	14900000	17300000	29100000	35400000	55600000	77300000	33400000	40300000	32300000	21700000	52500000	60000000	77300000	15500000	30700000	45300000	20300000	60600000	36100000	41300000	41800000	29400000	41500000
FPGQLNADLR	NA	NA	86700000	23600000	96400000	887000	77600000	NA	4950000	21900000	14400000	18600000	63200000	102000000	1730000	51700000	495000	1780000	15500000	NA	755000	6990000	3410000	17300000	19900000	1520000	NA	21500000	20500000	2600000	19700000	8100000	3410000	20700000	9580000	NA
GFGFIAPDGGSK	57200000	82000000	399000	49100000	48700000	103000000	147000000	84400000	27700000	75600000	87500000	68500000	425000	49800000	213000	75800000	642000	92500000	108000000	103000000	63200000	75000000	71800000	729000	148000000	3240000	327000	89200000	92300000	1620000	553000	138000000	162000000	59200000	149000000	1240000
VTFDIEPGR	22200000	23900000	6400000	9530000	10500000	7160000	41200000	22000000	40000	12200000	20500000	18200000	12900000	6650000	294000	10300000	51900	37900	43600000	11600000	4980000	18900000	16600000	30800000	54800000	NA	7340000	19100000	18700000	32200000	43600000	45900000	68500000	10700000	47200000	24000000
VVDLLAPYAK	2400000	330000000	276000000	206000000	301000000	293000	331000000	258000000	3770000	281000000	334000	2280000	250000000	224000000	184000000	3330000	5900000	319000000	246000000	71800000	2170000	1550000	796000	243000000	190000000	1890000	904000	314000000	59500000	40100000	861000	3150000	100000000	406000000	3570000	1270000
NEGADYFNPQVGPVILR	641000	20300000	15100000	795000	10500000	6920000	21000000	12700000	827000	7900000	14500000	66200000	26900000	5610000	21300	38600000	230000	2460000	783000	1410000	874000	116000000	425000	14700000	28800000	268000	45900000	39100000	29800000	476000	1330000	477000	1860000	36100000	2500000	1630000
VQTALQLAAQR	18300000	54200000	13100000	22500000	16500000	NA	18800000	20000000	1850000	14900000	32700000	17000000	17500000	9620000	1190000	30700000	462000	1780000	32900000	NA	1650000	34100000	15800000	1920000	23800000	12600000	6420000	11800000	13600000	1750000	20100000	7540000	19900000	16600000	15800000	11100000
EAFALAAAK	45600000	43400000	22900000	44000000	26500000	638000	26800000	35600000	2920000	16100000	17200000	14600000	18800000	NA	1810000	29000000	1320000	6550000	30200000	6430000	813000	16000000	14100000	16400000	19900000	646000	10700000	11000000	26000000	9710000	17300000	3440000	10800000	9510000	35900000	22400000
LPIATTFVR	2460000	41900000	880000	20800000	32700000	1000000	44400000	52200000	0	15100000	16700000	12400000	1180000	16500000	1590000	30500000	0	1590000	25200000	1130000	3620000	17400000	11300000	1790000	13800000	0	1920000	731000	2510000	1400000	NA	NA	11800000	5490000	14700000	1620000
FAEPLITLAK	702000	11400000	718000	3000000	6610000	0	1350000	8510000	0	10200000	1890000	9720000	1170000	1430000	2230000	NA	0	0	NA	319000	0	9420000	4060000	851000	4600000	0	0	694000	657000	702000	631000	389000	1400000	1810000	5960000	1210000
AAVDSGYAPNDWQVGQTGK	1940000	4450000	1030000	160000	1250000	2750000	3140000	2300000	2180000	3000000	2900000	3340000	13900	1340000	0	1510000	4910000	2990000	5720000	2460000	3000000	0	0	4600000	5180000	3530000	0	0	393000	941000	5630000	7140000	0	730000	2460000	2510000
QLNSAFTVR	15100000	982000	NA	4300000	17100000	646000	19500000	1870000	1970000	13100000	942000	240000	431000	191000	617000	20900	32800	1430000	786000	NA	129000	5680000	10300000	13800000	1270000	326000	43700	95500	4130000	531000	8370000	NA	684000	7270000	6250000	2090000
ISNGIGVER	8680000	2370000	5430000	4410000	4840000	8190000	7800000	7010000	407000	4000000	428000	186000	307000	5000000	12500	344000	353000	1320000	2540000	4050000	116000	3460000	3500000	3910000	5350000	148000	2590000	1670000	5410000	1160000	4050000	1950000	3760000	2530000	8050000	1960000
TFQTYSPLVDSIEVK	211000	NA	3130000	148000	2700000	119000	NA	2850000	20100	2310000	1790000	936000	798000	0	0	627000	0	0	3920000	975000	0	2770000	91700	1570000	3510000	0	54800	902000	74700	0	NA	245000	1470000	1440000	235000	361000
ILGAIQESEER	NA	15200000	8990000	8080000	14400000	8450000	30200000	1570000	661000	18000000	17700000	15400000	251000	8850000	948000	12800000	2000000	NA	20200000	3590000	8120000	8130000	6360000	NA	5080000	NA	2410000	17300000	6760000	9960000	4400000	NA	9000000	3330000	11800000	2790000
YTAVEQSGLLR	0	0	0	0	50800	0	306000	39300	52500	299000	111000	0	662000	119000	0	553000	0	19500	70300	0	0	1130000	50500	5040000	5690000	NA	0	1630000	1030000	0	16200000	9330000	6090000	1550000	627000	6070000
LAGEVPAIVYGGK	912000	1100000	704000	891000	973000	1230000	1050000	2610000	66100	2100000	2390000	1870000	551000	1520000	1490000	1360000	807000	308000	3990000	1220000	1490000	780000	1200000	909000	3650000	1670000	104000	2780000	7940000	1090000	8160000	2120000	3980000	2660000	7670000	1530000
ESNITNAISGK	29600000	27700000	28800000	18000000	12200000	17100000	3410000	17800000	1030000	11300000	8530000	8360000	895000	2300000	13100	10200000	2010000	2430000	11000000	7370000	1810000	8800000	884000	10600000	6700000	9170000	3280000	731000	8530000	4670000	6660000	6540000	5990000	8280000	11100000	6020000
YINDEALCR	495000	264000	1320000	358000	270000	209000	1890000	1490000	105000	967000	752000	1910000	209000	0	124000	1280000	245000	47700	685000	1350000	102000	1260000	1690000	2210000	1550000	352000	186000	247000	832000	152000	1300000	2920000	2660000	250000	602000	2620000
NAESYAVNQANR	14800000	16500000	7350000	2110000	9160000	11600000	15100000	13000000	10400000	7710000	7320000	11500000	19400000	18000000	15200000	5280000	8590000	11000000	4890000	17300000	9830000	4210000	5510000	18000000	18200000	14700000	107000	8910000	16400000	15400000	28300000	35300000	15400000	7440000	10800000	10300000
LESDGSYSPSK	2080000	185000	84200	784000	564000	575000	222000	269000	1060000	3030000	1760000	1620000	1940000	227000	83500	403000	855000	1520000	448000	743000	745000	748000	173000	944000	1000000	1440000	1740000	842000	1230000	250000	1240000	584000	348000	133000	317000	191000
LIESVAPGIISR	999000	780000	2430000	2890000	1040000	1060000	589000	886000	2510000	5350000	8850000	6420000	481000	530000	558000	1040000	1400000	855000	1840000	508000	809000	NA	1490000	1400000	344000	1870000	487000	448000	699000	817000	424000	2230000	871000	4610000	928000	1130000
AYDEIDGAPEEK	6260000	5530000	2660000	2250000	10800000	33600000	5410000	1380000	13100000	28300000	26900000	377000	5610000	2870000	331000	2080000	26300000	51600000	61200000	30400000	25500000	13400000	2090000	28000000	45500000	33200000	11500000	1450000	17800000	25300000	45600000	63800000	47000000	9150000	58500000	43200000
DAAIGSESIAK	21700000	38700000	14400000	38300000	25000000	20200000	25600000	25400000	30000000	27200000	21700000	21600000	919000	4940000	6680000	56200000	130000000	40800000	65900000	19700000	46900000	43700000	24200000	31700000	55500000	71600000	43400000	28500000	26000000	61000000	130000000	114000000	42300000	14200000	93100000	42500000
GEAGDNVGVLLR	1410000	0	NA	8710000	6310000	0	5230000	4940000	0	3790000	1420000	0	253000	0	0	11800000	0	0	170000	2040000	0	10600000	5600000	4990000	9170000	0	320000	6780000	728000	NA	6790000	NA	11400000	5700000	8620000	6450000
GAFEFQGQK	7270000	246000	63400	5120000	671000	204000	6270000	878000	140000	3480000	155000	70600	114000	24600	128000	36800	1030000	61700	37300	NA	79500	4100000	3730000	6580000	NA	29700	2720000	109000	4350000	4250000	6140000	8970000	6420000	5780000	1290000	6180000
LIPGFEAPVLR	87000000	243000000	283000000	14900000	275000000	350000000	342000000	261000000	111000	52300	269000000	184000000	314000000	124000000	273000	179000000	1260000	123000000	982000	207000	101000	462000	157000000	243000000	476000000	2200000	0	132000000	145000000	72600	382000000	197000000	323000000	267000000	1380000	1670000
IPWTESPK	2220000	75300	33100000	36400000	25200000	25700000	29300000	18300000	21200000	28000000	45200000	47400000	27500000	13300000	2040000	39300000	24100000	42200000	1400000	34500000	2230000	999000	1520000	33500000	46700000	20100000	15800000	16800000	51500000	1090000	35800000	62200000	44200000	34900000	45700000	52500000
SGSGATVYIGPDDSR	6820000	8510000	10100000	1650000	7900000	5310000	7990000	6930000	2110000	1020000	2810000	3520000	195000	2970000	2720	3110000	1400000	33400	576000	698000	2690000	3300000	982000	1430000	505000	395000	0	279000	206000	55700	591000	130000	423000	539000	112000	399000
FDNIADFAAGTPAR	442000	3500000	5390000	44800	6820000	1770000	8540000	7500000	106000	431000	33500	1220000	125000	0	0	521000	193000	4420000	105000	117000	80900	110000	52300	218000	302000	28200	0	107000	331000	0	115000	258000	4750	40600	52500	460000
YGFANTANVDGIK	2710000	6370000	7880000	382000	5180000	NA	5860000	5140000	773000	1110000	1460000	2980000	3560000	1300000	1370000	5540000	1450000	2560000	4720000	3170000	305000	953000	283000	2140000	1280000	841000	201000	1690000	787000	424000	1360000	3850000	466000	532000	151000	NA
IETQSDFVSK	8250000	5820000	1840000	3410000	5270000	7210000	9920000	6610000	6840000	7340000	5590000	3680000	9230000	2920000	827000	6970000	15200000	7020000	11100000	7470000	5800000	4290000	2410000	4880000	6920000	4000000	4280000	2580000	3730000	3340000	7050000	6180000	1570000	2040000	6520000	6380000
GAEYAVNFVPK	13600000	23300000	3060000	3440000	18100000	777000	16000000	21500000	1970000	6020000	10900000	11400000	12500000	11400000	679000	12800000	28500	2920000	3360000	11400000	2750000	11800000	2460000	12000000	37000000	NA	4560000	12600000	14000000	NA	42000000	38700000	75600000	11200000	16300000	21200000
VNQFYTAPTAIR	2520000	2500000	4190000	2020000	5150000	407000	4250000	1640000	715000	1260000	1720000	638000	930000	2620000	2280000	2460000	1280000	1600000	2590000	1550000	719000	488000	2250000	3350000	5870000	856000	676000	1170000	2010000	379000	1330000	1330000	2990000	1570000	1920000	944000
STGPYSLVTQQPLGGK	15600000	20400000	10200000	10700000	15300000	27000000	20200000	15200000	NA	19000000	24400000	16800000	20500000	15300000	96200	15600000	909000	25500000	NA	17500000	NA	15100000	14400000	25700000	25900000	32100000	6840000	16100000	11600000	11300000	26000000	34600000	12200000	14500000	21600000	23300000
GVLLYGPPGTGK	19600000	5250000	20100000	10800000	18100000	5310000	24400000	23300000	3120000	19200000	20800000	16500000	13300000	11500000	616000	32000000	2920000	432000	22400000	3340000	4750000	29500000	7210000	15300000	11900000	2770000	19200000	18300000	1210000	1100000	18100000	18400000	5950000	9620000	17400000	28600000
ETYLGFDPNR	16000000	71200	5190000	5760000	28800	49200	21300000	12300000	317000	15800000	20600000	456000	88800	0	97800	32400000	0	71200	594000	NA	88200	39800000	6090000	14000000	14100000	120000	25600000	12300000	26400000	13900000	13400000	22600000	86900	10200000	14900000	31800000
GSFNPTLDQWK	97200	31000000	41600000	12100000	329000	153000	672000	143000	28800000	33500000	39300000	80800000	274000	167000	19600	699000	1540000	236000	72900000	72300000	96100	138000	14000000	582000	25700000	1100000	49600000	20100000	64100000	22600000	35100000	42900000	13800000	19600000	23900000	55300000
IDADAGYYLK	2080000	6510000	10900000	2840000	17500000	NA	15800000	11500000	9180000	5170000	NA	14800000	21000000	9770000	1330000	39600000	2520000	2200000	8750000	NA	NA	24200000	3360000	NA	3100000	866000	5010000	5610000	NA	NA	1380000	1450000	6180000	3690000	5370000	7390000
GFAVVADEVR	3140000	24500000	9320000	3530000	7680000	743000	14200000	9300000	NA	NA	19000000	10300000	10700000	9190000	642000	12100000	NA	15400000	18200000	1450000	12600000	6880000	3180000	6500000	7420000	13600000	3280000	5360000	NA	8050000	NA	6380000	2650000	4450000	7030000	11500000
IQALSGGQQQR	3970000	6070000	5720000	4900000	2240000	2380000	4770000	4590000	666000	1840000	327000	715000	3740000	125000	77800	3330000	1660000	4170000	218000	1390000	282000	3660000	2570000	5040000	6060000	7950000	4860000	10700000	5100000	9110000	8650000	NA	1240000	8100000	3150000	2170000
IIDAFANEVTDR	2000000	427000	1490000	0	705000	58300	11600	1780000	236000	1460000	2210000	0	3190	0	0	63100	801000	973000	6440000	367000	2890000	1200000	0	2400000	1780000	2800000	0	629000	0	0	3110000	2200000	985000	931000	1020000	1190000
VVNITSQSVK	4620000	6330000	2210000	2310000	6700000	8330000	10600000	11300000	7990000	5400000	7400000	5630000	9080000	7860000	517000	4630000	10000000	10700000	9990000	4980000	5540000	4790000	4940000	9730000	7660000	8030000	1750000	3970000	5370000	7060000	8410000	10600000	762000	5310000	10200000	7660000
APIAVLGLSNSAR	195000	5320000	311000	451000	3120000	738000	5330000	NA	507000	2790000	6060000	972000	6370000	1230000	146000	1830000	0	614000	8470000	NA	597000	5450000	1060000	NA	8330000	9960	22200	3150000	443000	NA	2250000	511000	5030000	NA	988000	2360000
EGGSLTQALGNDGYFK	295000	128000	325000	75600	1810000	3020000	3230000	2230000	438000	593000	513000	2330000	2690000	101000	51900	238000	0	526000	4040000	2320000	285000	2350000	577000	1060000	4080000	36200	178000	1000000	1620000	235000	5470000	10800000	4560000	1270000	31100	730000
EGVITVEEAK	47200000	53900000	17600000	32000000	14200000	39600000	27200000	27100000	28100000	26500000	20700000	31800000	18600000	17400000	15900000	16800000	52800000	33100000	38300000	36300000	26800000	27000000	20700000	23500000	29300000	35800000	16400000	19100000	18500000	31100000	48400000	33400000	35200000	18400000	49700000	35500000
TALAQYR	50400000	1610000	3020000	50900000	16800000	2620000	19400000	18500000	3160000	23800000	1140000	1220000	133000	198000	1150000	26400000	735000	1930000	13600000	4770000	3600000	23800000	19100000	22300000	20200000	799000	16200000	914000	28500000	18500000	26200000	17600000	18100000	24100000	26000000	25400000
GEGGYLTNSEGER	7970000	285000	220000	4630000	5220000	563000	5620000	5790000	585000	147000	6040000	5100000	662000	91100	52500	6030000	640000	824000	10600000	1650000	722000	6040000	15400	5580000	7690000	1010000	3520000	388000	5000000	3190000	622000	NA	4110000	5370000	8190000	6530000
LPGISESAR	13100000	11300000	5710000	8930000	8890000	501000	11200000	10500000	1400000	1870000	5900000	4760000	8320000	5040000	193000	6910000	2330000	410000	14300000	10900000	544000	7290000	8290000	6500000	12000000	5490000	324000	4020000	2100000	2190000	7030000	11600000	7500000	5670000	16100000	11900000
SSYDLFLK	0	302000	0	0	360000	0	55800	518000	0	941000	51600	130000	3390000	58600	0	2960000	1070000	0	12900	0	0	6780000	3350000	240000	250000	0	0	420000	0	0	0	0	172000	NA	0	0
YDVEECQQR	2030000	4120000	1980000	7780000	2180000	1500000	2730000	375000	4170000	1070000	1690000	3310000	2330000	877000	1900000	6480000	2370000	8470000	2740000	2090000	3020000	3710000	3820000	5410000	6110000	1820000	3040000	4380000	7080000	809000	3490000	4630000	2800000	1530000	14500000	11000000
LSALGPGGLTR	92300000	31900	0	97500	0	99400000	11300	0	55900000	72500000	85800000	53300	46100000	32800000	0	37100	103000000	117000000	123000000	54700000	57800000	77300000	0	0	115000	103000000	0	0	68800000	8340	275000	118000000	54900	0	0	97200
YGFIETPYR	8760000	375000	7770000	7930000	1080000	258000	12500000	10500000	70900	16200000	17800000	448000	13800000	418000	320000	2210000	0	299000	31600000	NA	415000	13800000	14900000	12300000	6480000	0	430000	10400000	7010000	9060	14700000	19400000	6170000	8550000	21400000	15100000
AGIIDQVDATR	NA	5270000	888000	13100000	6850000	9870000	7820000	5930000	4300000	3270000	1340000	4930000	7580000	518000	1220000	10300000	1120000	11200000	12400000	3400000	658000	6820000	7540000	1690000	5380000	625000	1630000	6320000	4210000	1070000	362000	8450000	2340000	5240000	1740000	7280000
ATEDLELGDAGVDIYR	0	15900	53000	0	340000	207000	539000	686000	0	576000	1990000	1450000	1170000	0	0	264000	2880000	1050000	829000	31200	213000	2650000	0	506000	3410000	829000	0	680000	38200	135000	904000	895000	0	55200	0	72400
LGPEEITR	65700000	485000	33100000	65400000	30600000	67700000	31600000	29500000	52600000	49400000	53000000	42900000	35500000	945000	434000	40500000	81200000	110000000	86500000	55900000	60800000	55000000	50300000	87100000	70400000	86200000	56500000	48300000	41100000	46800000	107000000	101000000	51700000	46800000	114000000	110000000
DIPNVGEEALR	32000000	31300000	13500000	30700000	21400000	45600000	16900000	21500000	24900000	29300000	43800000	20700000	156000	14000000	56600	27100000	166000	53100000	8500	15200000	32000000	24900000	28300000	39300000	45800000	28600000	9230000	28700000	10800000	12000000	30200000	38800000	17000000	15600000	41200000	36100000
SGDLTPVR	31200000	17800000	7520000	1990000	9520000	21200000	469000	1680000	7190000	18500000	22800000	457000	9920000	5500000	8420000	785000	27500000	33600000	292000	15400000	18300000	16600000	1170000	23400000	21800000	14900000	20200000	11800000	14100000	14300000	26600000	28400000	11900000	14800000	38300000	31000000
AGFDTSGQSDLFDGR	4980000	10400000	2970000	8320000	2930000	5410000	4690000	3740000	1530000	5490000	6020000	364000	3500000	33800	0	5030000	NA	7430000	7900000	703000	5340000	5450000	1510000	6830000	2900000	5740000	1560000	2820000	1280000	1990000	4810000	4140000	1300000	4100000	4030000	5770000
TLGAFTDVTR	362000	631000	1020000	422000	3610000	NA	7470000	5330000	597000	2300000	3440000	4460000	4480000	1940000	61300	3640000	985000	52700	2630000	844000	46100	1990000	525000	597000	2740000	101000	94100	469000	2010000	181000	1280000	2740000	1530000	1020000	1720000	993000
SFGAPTITK	29600000	7480000	17000000	18500000	6040000	19100000	1440000	11600000	14500000	20300000	14800000	5490000	8070000	1180000	7470000	14000000	6160000	5690000	15400000	19100000	14500000	16700000	10700000	NA	21300000	18700000	16300000	16600000	17500000	15800000	17400000	23200000	18100000	13000000	8570000	23300000
AAVQEGVVPGGGVALIR	31700000	55500000	35400000	30200000	23700000	55800000	38300000	38200000	31600000	38700000	40000000	21100000	36400000	308000	585000	26500000	612000	50700000	75600000	43100000	54700000	44300000	24200000	55500000	45900000	101000000	20900000	27500000	51300000	29400000	71000000	59400000	33400000	47400000	28300000	36900000
DANAIGQQTR	12000000	2460000	2100000	3410000	6540000	15200000	4870000	4300000	6640000	3150000	7220000	11700000	4590000	2220000	2070000	28200000	46600000	48500000	23800000	40500000	28800000	21000000	3790000	7080000	6140000	7920000	14000000	2780000	21600000	4690000	8210000	7900000	4080000	2930000	25400000	33600000
AVGENTFQPK	32500000	16100000	14600000	8510000	30200000	46900000	26200000	27200000	33700000	26500000	51400000	28800000	29600000	23800000	19300000	46600000	96700000	120000000	99800000	122000000	73800000	62600000	23800000	36500000	36900000	53500000	46100000	17800000	71000000	20800000	34600000	59300000	35900000	11600000	94700000	95900000
IEYDPNR	122000000	99800000	61900000	114000000	105000000	84000000	96300000	82400000	114000000	37600000	71600000	69800000	87600000	53200000	68500000	129000000	60000000	109000000	80000000	76800000	76400000	84000000	100000000	72000000	81400000	21200000	65900000	83700000	83200000	71300000	56400000	81300000	77700000	75400000	156000000	109000000
AAGTYAQFVGR	999000	134000000	100000000	141000000	123000000	131000000	130000000	96700000	119000000	1500000	118000000	113000000	120000000	660000	146000	150000000	121000000	127000000	190000000	98200000	106000000	138000000	134000000	130000000	139000000	117000000	97100000	110000000	125000000	51900000	85700000	136000000	452000	121000000	162000000	138000000
DGGYAQIR	52900000	50300000	35600000	69800000	50900000	32900000	32500000	37200000	50200000	36300000	36900000	39100000	54900000	35700000	36600000	62600000	47900000	57200000	64200000	38700000	29200000	48500000	36300000	43700000	48400000	31900000	43700000	40000000	43800000	27700000	31700000	44100000	29300000	42900000	85100000	62900000
GPFVDAYVLK	557000	43500000	3080000	7590000	28600000	12200000	327000	32000000	2100000	30500000	38500000	24500000	41900000	29500000	30600000	28000000	155000	12700000	43900000	361000	598000	34200000	24300000	771000	242000	905000	2690000	25300000	1040000	474000	632000	42800000	40900000	37800000	22900000	12800000
ALTDLTFSK	34900000	35900000	23600000	62400000	22900000	29800000	24500000	17900000	24400000	24700000	33900000	16400000	23800000	16200000	21400000	31000000	5430000	30000000	36000000	14100000	16300000	20000000	23800000	23200000	16900000	18300000	15200000	12500000	13600000	9470000	15600000	13000000	7460000	20200000	32500000	25700000
GADIETLR	21700000	544000	17700000	1400000	142000	21800000	567000	19200000	20100000	21900000	334000	15800000	17300000	12100000	2380000	786000	31200000	29700000	639000	22400000	20600000	29000000	28100000	28500000	25600000	25300000	30100000	566000	37900000	28000000	31800000	32300000	22500000	864000	49000000	36500000
AQELQDGPAPR	33500000	23400000	5440000	24200000	12400000	31700000	16300000	12100000	10400000	18200000	21400000	13200000	16300000	8750000	9890000	12600000	15400000	22500000	36700000	21100000	9510000	10300000	15800000	8110000	20100000	2920000	3690000	6630000	4920000	9100000	15900000	14600000	15900000	7690000	40300000	19100000
FQQATGQLENTAR	2360000	1150000	29800	499000	11100	3050000	36400	166000	145000	2090000	4120000	3090000	357000	0	78500	1950000	5200000	3700000	5750000	2560000	1450000	2900000	883000	1770000	4090000	1400000	971000	2630000	1190000	1050000	4720000	5350000	2480000	2850000	6290000	4950000
NAAVILNNAGEPVGTR	6370000	13200000	11500000	6110000	11300000	7840000	15900000	16700000	13600000	4240000	10100000	8610000	13500000	7890000	8400000	9370000	6090000	6920000	6190000	7430000	3720000	6540000	3490000	4460000	3130000	1140000	2650000	4820000	364000	2730000	1980000	3490000	3000000	5980000	1810000	2920000
TALALGADR	49400000	22400000	14100000	12500000	18100000	581000	21200000	21600000	937000	17600000	17200000	18300000	2150000	1250000	3370000	16600000	471000	1880000	27500000	23200000	1330000	13900000	10000000	850000	16000000	1910000	3330000	11200000	3080000	2250000	25300000	22300000	17000000	8940000	25600000	21900000
TAVALDTIINQK	1600000	13400000	9750000	2480000	11600000	1520000	7260000	5860000	2520000	7190000	26200000	11300000	9080000	1700000	1020000	13000000	211000	462000	9440000	2620000	524000	26200000	7050000	34100000	35600000	499000	2210000	17700000	18600000	506000	4580000	2540000	35500000	18400000	5650000	16200000
SGTLTYEAADQVVK	2570000	0	2840000	229000	1410000	1060000	1030000	18300	1190000	63800	0	0	157000	0	87900	0	245000	459000	0	98800	418000	608000	10600	722000	0	328000	0	0	80900	0	1480000	431000	192000	493000	644000	49100
EIVEVSGAK	23900000	35000000	17600000	43600000	23100000	23000000	29100000	26200000	30800000	26100000	19900000	17900000	21100000	18700000	16800000	30900000	46200000	38100000	29700000	25800000	20600000	33900000	32700000	36500000	35000000	23600000	33300000	29700000	35200000	37600000	36600000	34700000	30000000	26900000	57400000	44700000
VDINDEGVIK	4610000	752000	3170000	1350000	4370000	6840000	3190000	2770000	6810000	2840000	2470000	1430000	5370000	1060000	68200	4840000	6730000	NA	1150000	2600000	8590000	6340000	7980000	7690000	7650000	11500000	6060000	3250000	9370000	8780000	9640000	12700000	6050000	3080000	8690000	14200000
IASPNGDSIK	11800000	8100000	4710000	9940000	10500000	6120000	9250000	11200000	10800000	7050000	16300000	10800000	13100000	5480000	12100000	8250000	16800000	17700000	17000000	10700000	12500000	10000000	8970000	18100000	20400000	11500000	19400000	13300000	NA	11000000	22700000	27000000	13000000	14800000	27200000	10000000
LLGFDDR	34500000	51800000	5160000	1170000	23600000	1040000	34300000	26800000	951000	44500000	56700000	39800000	23400000	16800000	22100000	39400000	258000	1000000	73100000	699000	402000	50600000	46800000	485000	53600000	453000	32200000	32800000	984000	45500000	2460000	73600000	55900000	39900000	75700000	66600000
VIENAEGAR	61400000	24300000	10800000	23100000	31700000	44300000	20500000	22000000	22900000	29900000	39800000	27700000	32600000	18300000	15300000	13600000	27300000	59500000	78600000	28900000	19300000	12900000	12100000	19100000	27000000	14000000	8330000	8530000	5120000	11100000	25000000	39700000	24900000	3500000	50500000	21100000
IAGLEVLR	47400000	105000000	43600000	9860000	70300000	8080000	92600000	82000000	5220000	117000000	127000000	103000000	72800000	44100000	58800000	94500000	12300000	761000	174000000	12000000	6180000	97200000	88600000	131000000	99300000	425000	24900000	77000000	5960000	41200000	2330000	24300000	84600000	71800000	104000000	81400000
IINEPTAAALAYGLDK	23700000	99200000	657000	34000000	58800000	111000000	133000000	123000000	23900000	88600000	85400000	90600000	4670000	55100000	33200000	55100000	558000	40100000	90800000	374000	101000000	83300000	23900000	61700000	96800000	9950000	210000	63000000	55000000	67700000	531000	74200000	39500000	66100000	19600000	50400000
ELEDTPSVR	110000000	125000000	34800000	152000000	41200000	102000000	40800000	45500000	44600000	107000000	115000000	81900000	4570000	40200000	43900000	112000000	153000000	134000000	127000000	70200000	111000000	93400000	82200000	105000000	93800000	110000000	108000000	75700000	70300000	74300000	113000000	103000000	80300000	84100000	173000000	112000000
LDQAQFR	40500000	229000	2300000	29400000	22000000	1270000	30200000	24900000	639000	25600000	NA	1180000	1590000	1850000	4550000	4860000	199000	2160000	6790000	28200000	1390000	23000000	23200000	19800000	30400000	1390000	22400000	4890000	38300000	20800000	33000000	21600000	26400000	28000000	50000000	33400000
GPNTVAIR	15100000	1250000	8370000	5680000	11200000	14200000	26300000	5170000	10900000	8030000	392000	1010000	1700000	88700	120000	762000	15400000	12000000	1330000	1410000	4710000	3850000	3430000	11300000	477000	7500000	3160000	1970000	22900000	13100000	21900000	23100000	8370000	NA	10300000	4450000
DIASLGIYPAVDPLDSTSR	319000	375000	3190000	729000	290000	7120000	4620000	NA	32700	3050000	311000	1540000	803000	66000	670000	813000	0	0	771000	384000	NA	1520000	47600	2190000	266000	0	51300	316000	309000	34100	2880000	2540000	26800	1310000	0	152000
GVQSVLQR	61600000	38700000	3050000	33500000	16600000	27800000	29800000	24000000	27800000	21700000	18100000	1000000	16300000	13500000	0	13800000	13100000	21000000	29300000	17000000	1130000	12600000	55200	412000	739000	17900000	699000	1320000	583000	376000	798000	1230000	616000	412000	274000	450000
LSEEEIER	2840000	2510000	397000	1420000	2760000	4390000	3550000	1990000	554000	3150000	5230000	4650000	123000	8100	137000	814000	209000	1390000	2980000	2950000	2030000	986000	797000	509000	1570000	328000	542000	1640000	1270000	1740000	1750000	629000	253000	3700000	1440000	1800000
DGGAFLDR	133000000	1510000	56700000	68100000	17600	37600000	58200000	46300000	36800000	32600000	23300000	2050000	15500000	767000	16700000	15300000	788000	21100000	3110000	13000000	17700000	12200000	266000	19300000	34900000	37000000	381000	138000	28800000	17700000	170000	78700000	73400000	15000000	25300000	629000
GNQILFVGTK	2610000	128000	157000	5250000	21800000	34200	13200000	140000	0	2120000	0	NA	97400	41300	0	174000	0	29500	1770000	43100	0	5450000	3930000	3130000	28900	0	51000	1410000	120000	0	186000	273000	2960000	2770000	3000000	2500000
EAGEALATSTR	3900000	8910000	5590000	4310000	9480000	3270000	5640000	5640000	4020000	1430000	935000	1320000	2880000	1580000	1230000	1410000	153000	942000	606000	673000	1470000	847000	123000	814000	1180000	344000	1030000	678000	320000	933000	742000	872000	558000	581000	440000	942000
NPVLTENLTGIAR	2900000	9360000	1260000	3310000	11300000	389000	5410000	4620000	1930000	384000	9420000	3270000	1400000	8860000	3710000	2060000	1670000	2090000	11200000	1560000	1230000	5130000	3660000	2790000	703000	2770000	2340000	1760000	1970000	NA	11300000	1850000	793000	5100000	2400000	6420000
GVIGLPNGTGK	28600000	22000000	1600000	16500000	14200000	19800000	27900000	20600000	3560000	26200000	30900000	19400000	22400000	14500000	NA	18800000	3360000	30500000	35200000	20700000	1650000	30800000	18100000	35400000	26800000	36200000	24200000	22000000	26300000	24900000	37400000	43100000	25800000	1260000	38500000	32100000
TVVADLPQELVK	17400000	612000	29200000	16600000	35200000	33700000	41000000	43100000	40200000	48200000	52000000	1030000	43300000	27500000	38400000	25600000	3020000	42000000	17900000	33000000	38800000	35000000	13300000	57400000	45000000	60200000	14600000	30300000	35200000	47000000	53400000	51800000	27700000	31000000	13600000	20900000
LLIGNDLTADR	1340000	3470000	523000	1490000	4390000	3050000	NA	1600000	3580000	439000	4410000	5210000	880000	720000	2140000	19800000	15600000	4640000	7420000	7230000	11000000	15500000	2670000	1530000	2940000	1750000	2220000	2210000	10600000	690000	2270000	2860000	2400000	2960000	734000	6910000
VLSEASAALAQK	27400000	4880000	2610000	18500000	2820000	13300000	10100000	11700000	8040000	13800000	7190000	4260000	5750000	4010000	3620000	1070000	2120000	7310000	9720000	2180000	4800000	9800000	6390000	9870000	9290000	6640000	3050000	2440000	5360000	1400000	17900000	4060000	6670000	4070000	5900000	14800000
TAVAIDTIINQK	1600000	13400000	9750000	2480000	11600000	1520000	7260000	5860000	2520000	7190000	26200000	11300000	9080000	1700000	1020000	13000000	211000	462000	9440000	2620000	524000	26200000	7050000	34100000	35600000	499000	2210000	17700000	18600000	506000	4580000	2540000	35500000	18400000	5650000	16200000
GLNAVNVK	73700000	4370000	3470000	41200000	24400000	5760000	34200000	31800000	NA	41100000	9110000	5720000	8420000	4670000	4630000	NA	NA	3350000	NA	37200000	1250000	42300000	35100000	51400000	46800000	911000	28200000	26700000	36500000	34700000	52200000	NA	53100000	23500000	77800000	60200000
LAGVPAQINIAEVR	8040000	2040000	2410000	18200000	767000	1380000	1620000	495000	1200000	772000	1690000	579000	1160000	960000	1680000	896000	961000	862000	1940000	NA	NA	9050000	713000	1850000	1060000	8410000	1210000	986000	NA	NA	879000	5230000	1020000	2480000	1560000	1090000
EDAANNFAR	19700000	20400000	12300000	953000	26100000	18100000	33300000	34500000	50000000	32900000	22400000	38300000	31900000	27500000	20800000	243000	56300000	26000000	15400000	26000000	21800000	25300000	12700000	18700000	21500000	4000000	24000000	15500000	18000000	31700000	18600000	7690000	15800000	17200000	18800000	16600000
FESDVGAENIAAAQK	38600	25600	67600	118000	235000	78200	29800	155000	110000	74500	56400	40100	1110000	662000	0	42000	90600	215000	98500	280000	50200	75400	0	126000	929000	92600	0	370000	97100	138000	457000	264000	1160000	92000	98000	172000
VILLGDSGVGK	19900000	16700000	19700000	20000000	17000000	3210000	2270000	20700000	7930000	NA	3680000	18200000	18700000	15400000	16300000	33700000	1960000	2800000	NA	12700000	NA	28400000	13600000	1170000	15100000	NA	3600000	22700000	NA	1380000	15100000	14000000	13400000	22500000	13500000	17200000
QQEQNTEFDNIR	120000	191000	300000	0	1420000	0	909000	1330000	0	432000	315000	238000	166000	0	0	575000	0	0	810000	214000	0	23500	271000	959000	1020000	0	0	25500	173000	0	0	0	35100	0	445000	546000
DASATAIYGSR	19400000	34700000	15200000	7290000	16200000	9950000	18800000	22900000	19400000	15000000	17600000	23200000	21600000	27100000	13500000	24600000	12700000	18600000	24900000	16000000	12100000	20800000	8700000	18000000	17000000	8690000	14300000	19900000	18000000	19800000	12800000	12400000	17000000	11600000	28200000	15800000
DYEYLQR	6970000	209000	8990000	9810000	5810000	2410000	6290000	6310000	1620000	8040000	6810000	461000	732000	72900	1300000	7560000	7440000	7470000	8310000	6550000	1800000	4790000	5720000	7710000	6900000	6650000	1280000	4930000	4320000	7210000	10700000	8850000	5010000	1420000	329000	10600000
SDGYYVQQR	68300000	77500000	31100000	49000000	23700000	37800000	55000000	49700000	34000000	36100000	41700000	38800000	718000	24700000	36300000	27500000	38100000	42300000	39500000	60500000	32100000	38400000	43800000	55600000	63200000	44800000	26500000	40600000	73400000	73800000	68800000	57000000	68200000	50500000	50500000	38600000
DAFAGESQANR	848000	772000	35800	102000	171000	71700	36100	49800	92100	398000	608000	1510000	744000	118000	225000	279000	189000	204000	142000	1090000	355000	440000	58200	26900	1290000	485000	68800	1010000	34700	367	732000	1060000	173000	88500	210000	1170000
GGIAVDYLEAR	7210000	18100000	18300000	9040000	11300000	518000	34300000	21300000	249000	17500000	13000000	19000000	20300000	27600000	0	14500000	0	325000	3250000	NA	82700	13200000	10400000	36600000	24600000	57200	8590000	22000000	NA	35000000	32500000	20800000	19200000	22800000	3000000	16000000
VPAINVNDSVTK	688000	370000	1150000	603000	1020000	969000	591000	807000	1390000	702000	300000	1720000	568000	1590000	129000	619000	1520000	1700000	475000	1160000	1380000	326000	1890000	795000	985000	1100000	413000	1060000	1720000	1770000	1810000	1190000	1630000	685000	900000	527000
VIDLIEPYSK	17800000	38900000	30100000	20600000	24900000	NA	30000000	30400000	17400000	23600000	2360000	21900000	2550000	488000	18300000	21500000	0	4160000	32200000	16600000	19500000	20500000	17300000	19400000	20400000	2610000	8380000	16400000	20400000	16600000	24600000	23700000	20000000	20100000	19900000	14600000
NPQTGATIK	39600000	23400000	14100000	31000000	21800000	29900000	22900000	35200000	25900000	35700000	29500000	36800000	25100000	19200000	15000000	60400000	34700000	53100000	70800000	88400000	43000000	69100000	60500000	47000000	84400000	53900000	76700000	66300000	138000000	89700000	84300000	94900000	105000000	77600000	130000000	64700000
EQGIDTEFVNWR	0	6780000	66000	279000	1160000	0	1910000	1310000	0	122000	783000	2460000	329000	428000	0	333000	0	0	1860000	36300	0	244000	0	3060000	6810000	0	0	160000	71000	0	53200	114000	814000	111000	46600	33500
GFFGAPGLSDEK	NA	44700000	20700000	2730000	269000	224000	40200000	26300000	409000	17700000	NA	2160000	20800000	607000	687000	9740000	0	858000	228000	415000	403000	NA	10600000	32700000	33300000	NA	3080000	17300000	11700000	5230000	43000000	NA	19400000	8320000	10700000	15200000
IIGVTAPDR	92800000	6790000	58000000	60600000	52000000	74500000	78400000	52900000	64600000	72600000	32800000	3400000	7750000	4880000	53500000	29800000	45300000	58000000	32900000	41700000	48400000	21100000	39300000	90300000	54900000	1620000	17000000	37900000	59400000	72600000	55600000	53800000	70600000	26700000	34200000	59300000
TAASAEDFPAFIVNR	0	631000	9510000	966000	NA	21100	1810000	NA	145000	1710000	5410000	4090000	5620000	2490000	61300	4200000	7570	92000	3260000	0	21100	1580000	402000	2010000	7450000	0	0	4350000	0	0	14000	18900	1560000	6560000	1220000	0
LIIVDEPTAGLDPAER	3150000	1040000	7480000	3020000	146000	210000	8230000	7500000	1920000	4230000	915000	1280000	540000	96600	22200	550000	7800000	5270000	NA	6120000	292000	4350000	2110000	6210000	6920000	493000	72100	362000	4410000	1060000	3530000	4090000	2250000	4780000	2910000	3080000
LAGGVAVIK	72900000	32800000	34700000	6630000	29100000	11000000	38500000	34400000	3570000	NA	NA	13800000	14000000	8420000	8750000	NA	4200000	NA	NA	6310000	NA	NA	3190000	35900000	6670000	NA	14700000	11300000	54100000	47000000	NA	45400000	40800000	62900000	57200000	4450000
GISLENIAR	19000000	25600000	11300000	1990000	3030000	1060000	19500000	6730000	1190000	13800000	26600000	2320000	13100000	12400000	195000	16800000	7630	1850000	40200000	6030000	1320000	18100000	10000000	15700000	NA	39800	5870000	9080000	11500000	3770000	25800000	18500000	2860000	9940000	16700000	15700000
IGINGFGR	0	157000000	131000000	112000000	102000000	0	103000000	86200000	0	0	96300000	75100	82600000	67800000	68100000	96200000	66000	8260000	362000	466000	0	0	67400000	109000000	90300000	0	0	0	114000000	407000	114000000	0	100000000	100000000	134000000	90200000
VIEIYGPESSGK	17600000	18500000	12900000	10300000	9640000	11500000	12000000	3260000	12800000	8720000	9570000	13700000	20400000	9510000	1780000	12000000	2780000	12100000	15300000	6540000	10200000	9600000	164000	11300000	11400000	7720000	4500000	10900000	10000000	9230000	15100000	12500000	16400000	6920000	17700000	11500000
GNLAPEGAIVK	24100000	16000000	8680000	22300000	7440000	23100000	6410000	535000	1670000	16800000	NA	753000	1130000	3800000	11600000	13900000	491000	1270000	NA	20900000	2220000	17800000	20400000	2070000	20600000	27000000	156000	14400000	22300000	13800000	24100000	39100000	144000	15800000	NA	28800000
LYGAEPANFLDVGGGATK	65800	262000	9790000	7020000	11200000	9850000	14400000	15000000	0	6640000	6270000	6780000	63300	5330000	47200	8800000	0	1500000	10600000	8070000	6090000	10800000	4000000	9540000	11900000	0	48900	7800000	5640000	2730000	11300000	12300000	6140000	8010000	4380000	6150000
DAGTIAGLNVLR	2730000	132000	11800000	1070000	11200000	21500000	15700000	12200000	347000	26000000	17300000	782000	181000	55700	828000	10700000	0	33600000	10500000	516000	2320000	13700000	2810000	8150000	7960000	894000	3670000	9890000	7710000	11800000	8020000	9550000	4170000	8850000	1430000	6210000
IINEPTAAAIAYGLDK	23700000	99200000	657000	34000000	58800000	111000000	133000000	123000000	23900000	88600000	85400000	90600000	4670000	55100000	33200000	55100000	558000	40100000	90800000	374000	101000000	83300000	23900000	61700000	96800000	9950000	210000	63000000	55000000	67700000	531000	74200000	39500000	66100000	19600000	50400000
VNVDGGGITGQAEAIR	246000	810000	3560000	1790000	481000	1610000	640000	370000	1250000	457000	1640000	289000	1160000	20000	51900	584000	3870000	3270000	538000	1610000	3080000	3710000	133000	1440000	585000	2160000	1630000	63800	3200000	1160000	2060000	366000	32100	1990000	884000	7110
LTNCPTSPR	41700000	52300000	26900000	70400000	24200000	29100000	16800000	16400000	17800000	30800000	33500000	25500000	17500000	13000000	15400000	14400000	14700000	36000000	30100000	22500000	20500000	22400000	18000000	19300000	21900000	23600000	24700000	14600000	18500000	9650000	15900000	15000000	6600000	30400000	28100000	30500000
TIEYDPNR	39000000	3110000	19000000	47900000	23200000	14100000	18800000	19800000	17900000	15100000	17300000	17700000	872000	12400000	747000	35000000	NA	22400000	30500000	33200000	6470000	29200000	63600000	19100000	19500000	16400000	14100000	17300000	46800000	27400000	11300000	10300000	13700000	27900000	68800000	33000000
VISNSGLNTYGILNAGK	32000	1700000	248000	0	344000	780000	695000	704000	158000	793000	745000	795000	1120000	156000	0	16400	3580	365000	200000	91000	14000	62900	0	678000	492000	170000	0	448000	143000	0	242000	174000	0	1400000	0	63300
VIEFQGFEK	126000	4150000	967000	986000	721000	0	811000	1440000	0	463000	887000	993000	1130000	51800	0	612000	0	33100	75300	0	0	570000	146000	408000	1320000	37100	149000	1690000	120000	1010000	807000	22900	0	2920000	119000	435000
STGAVVNGPIPLPTNK	17100000	126000	14200000	12700000	574000	16000000	3660000	459000	11400000	499000	12200000	10500000	377000	336000	8400000	7900000	18100000	12300000	15800000	6120000	13900000	12200000	5770000	302000	253000	14700000	6180000	8960000	12800000	8010000	9630000	9020000	204000	18300000	9150000	9980000
LAEEDPTFTVR	68400000	60100000	1150000	38400000	21000000	54900000	30100000	27900000	25300000	45000000	52500000	35700000	33500000	16100000	4580000	25700000	59600000	56000000	73800000	24400000	36100000	23000000	20900000	40600000	43200000	39600000	13100000	24800000	15600000	22700000	41500000	29200000	27700000	22800000	36200000	28700000
EFVPSVEK	55000000	61900000	25100000	46800000	13500000	27900000	19000000	19000000	21500000	27700000	26700000	1390000	18100000	1050000	18500000	19100000	38600000	34200000	39700000	17800000	27200000	23200000	20300000	33900000	22400000	31000000	29900000	16900000	25300000	24200000	30700000	19200000	17900000	28100000	28500000	23200000
AGSSFGDFEAR	25500000	481000	36400000	24800000	16800000	10800000	31300000	24800000	27100000	19900000	20600000	21800000	24600000	28700000	33000000	33700000	1290000	28700000	29800000	30800000	23800000	50200000	199000	50400000	38600000	56600000	57400000	84000000	71300000	99700000	46500000	36400000	38200000	646000	50200000	356000
YDAAGIPSIK	14000000	26000000	34200000	14200000	12100000	11000000	25900000	24300000	18600000	12500000	11100000	12000000	16000000	17600000	3160	42700	15300000	20000000	16400000	19400000	17200000	26700000	17100000	33700000	27200000	28700000	25300000	53100000	54200000	63100000	37600000	22800000	19400000	56600000	27300000	29700000
SLDQNLLTSR	417000	183000	15300000	12200000	1080000	24100000	521000	10600000	5370000	11500000	11500000	269000	733000	8320000	385000	1510000	6370000	16600000	111000	5280000	7250000	10400000	11100000	14400000	275000	9010000	7850000	13300000	9520000	11500000	7980000	7520000	8680000	19200000	14000000	77600
ELSPLVGLSK	24400000	47600000	0	117000	30300000	0	396000	84400	543000	42300	18800000	14100000	31000	16300000	0	39500	133000	9890000	30000000	0	10700000	0	0	0	19400000	40500	0	16200000	24900000	0	0	25200	0	7060	0	0
SIEYDPNR	626000	6120000	9540000	4600	5630000	7290000	6300000	7120000	9070000	547000	5330000	5630000	208000	5560000	5310	206000	5190000	7360000	942000	5600000	6200000	5820000	37300	3930000	2070000	4940000	5730000	3660000	5720000	5690000	4180000	328000	3120000	9370000	1130000	297000
EAGDYEALQK	12100000	11300000	2540000	8610000	3830000	10700000	6730000	4740000	5100000	7100000	5600000	6890000	442000	1830000	2290000	1820000	6840000	9840000	8230000	6240000	5570000	5970000	4080000	4340000	6160000	781000	761000	3270000	8190000	4260000	6810000	5450000	7460000	3980000	14900000	9780000
AGDITGGLPR	142000000	1130000	56800000	103000000	675000	98600000	991000	52400000	60900000	79100000	201000	641000	1400000	307000	719000	1510000	99500000	111000000	534000	54600000	79700000	69700000	936000	94300000	72400000	101000000	82000000	1780000	67200000	58100000	93300000	91000000	64300000	65500000	92200000	70000000
VTELFEAR	140000000	153000000	70000000	81400000	66000000	123000000	86700000	82900000	74100000	76200000	113000000	2070000	62400000	66000000	68400000	70300000	55200000	170000000	5370000	90900000	127000000	89300000	58100000	86500000	74100000	97700000	66800000	60300000	90300000	50000000	93300000	106000000	66800000	68800000	124000000	113000000
VNENSQPVGSCVAR	1410000	3130000	2050000	1910000	3500000	3510000	5930000	4330000	4430000	556000	2540000	6070000	925000	2510000	2450000	170000	1670000	275000	1780000	3340000	1020000	3210000	492000	2840000	2410000	112000	492000	1600000	2120000	570000	1070000	1890000	351000	1950000	1810000	4980000
GGATNGPAAVYAVTK	5640000	5960000	1210000	4200000	1140000	2870000	449000	3920000	920000	NA	4240000	2290000	922000	6830000	1210000	791000	2000000	6340000	1480000	2340000	NA	1220000	2710000	2740000	2500000	8710000	3940000	1380000	5590000	507000	5450000	6970000	1330000	2840000	4600000	1630000
SPSAGQEVR	3790000	2740000	1260000	1280000	1240000	6740000	1090000	3060000	4300000	1660000	2270000	1510000	1560000	1720000	668000	1150000	3150000	1780000	2890000	2170000	5680000	NA	NA	828000	2650000	5400000	1480000	3550000	4920000	2180000	NA	2300000	1250000	637000	2250000	1410000
NLPGVDVVAAR	739000	233000	3950000	1040000	284000	1680	295000	67100	221000	1050000	763000	352000	85500	0	411000	4570000	5020000	NA	252000	1150000	1430000	5290000	831000	3900000	6290000	3140000	2030000	397000	9380000	1780000	8610000	1790000	102000	11500000	3310000	2700000
DLCAEDLAPGGDIGR	1100000	29100	1640000	2110000	7120000	41400	6570000	10000000	64800	890000	3680	398000	1150000	38700	0	8600000	91300	798000	504000	3240000	182000	4160000	2370000	5050000	7760000	54600	129000	4380000	10100000	1420000	4270000	778000	2280000	NA	10500000	7000000
LLELGQTPLPK	44000	2100000	2560000	1740000	2870000	812000	997000	1030000	2100000	1420000	807000	1070000	1030000	702000	1300000	1160000	63300	1840000	4290000	720000	887000	2010000	1190000	2670000	618000	900000	585000	963000	2060000	231000	1350000	721000	825000	1260000	531000	696000
IVTPAGTPAAGTAVK	23400000	9220000	2720000	1070000	4330000	8980000	7110000	4210000	3450000	541000	3290000	2310000	4270000	3200000	144000	556000	3890000	4130000	9420000	1080000	2670000	1010000	341000	2050000	1530000	217000	450000	361000	306000	120000	1450000	2010000	1280000	414000	381000	1350000
VADISLADFGR	2210000	NA	3910000	697000	5570000	435000	10100000	6020000	25800	8960000	5860000	NA	289000	69600	410000	2340000	0	0	12000000	NA	0	4040000	NA	1800000	8040000	0	3470000	545000	3830000	9310000	2360000	5450000	2520000	836000	755000	4040000
NGVLDPQGEAVR	2300000	9930000	3240000	99900	1950000	170000	3510000	350000	955000	7600000	7490000	3800000	321000	2140000	3600000	3140000	236000	885000	7920000	3930000	348000	3520000	42600	369000	295000	7770000	4910000	2990000	5340000	513000	8470000	4310000	5270000	4890000	670000	2660000
SSGETFAQIK	408000	1920000	314000	2040000	640000	1040000	3850000	2210000	1630000	2620000	166000	121000	183000	2570000	2650000	583000	395000	1330000	332000	530000	247000	82600	1950000	2800000	70900	114000	464000	182000	621000	134000	3150000	900000	2330000	34700	2780000	2270000
TITLDVEPSDTIENVK	1360000	237000	17000000	11000000	16100000	28000000	700000	272000	34600000	24800000	22800000	815000	21300000	498000	308000	145000	37800000	16000000	2020000	12200000	20500000	612000	603000	13400000	15400000	14300000	3340000	9180000	10800000	10400000	19100000	13200000	1610000	18100000	335000	4110000
LSALGPGGLSR	88100000	72000000	68700000	69500000	55700000	73400000	60500000	46500000	40200000	46300000	94600	336000	182000	31500000	114000	22100	51400000	72300000	83700000	39900000	53000000	68800000	39900000	55000000	49700000	46500000	44200000	40400000	53500000	33700000	48800000	52600000	31200000	56400000	69300000	64900000
GFGFIAPEGGAK	146000000	116000	77300000	164000000	58500000	147000000	119000000	80800000	53100000	107000000	103000	114000	75000000	109000	0	89100000	0	17300000	186000000	93300000	53800	104000000	0	131000000	109000000	0	73400000	64000000	76500000	97300000	113000000	97500000	0	0	142000000	0
QVGVPALVVYMNK	547000	526000	601000	230000	3490000	547000	2140000	3350000	332000	331000	1890000	4760000	4290000	3360000	2870000	2440000	11300	543000	5960000	946000	950000	17600000	5540000	17800000	34800000	0	184000	10400000	191000	461000	639000	1880000	15400000	23200000	8010000	1190000
DGAAAVYGAR	54500000	80100000	77900000	49300000	41000000	40400000	80400000	78800000	66800000	27300000	40500000	53500000	77000000	68600000	57900000	117000000	90900000	77400000	98100000	83900000	74700000	103000000	74100000	71200000	93000000	69100000	88200000	98600000	142000000	125000000	102000000	88500000	108000000	72400000	165000000	109000000
ASNGVVVITTK	64700	7140000	NA	0	7450000	378000	2100000	20700000	3290000	700000	11200000	62900	713000	NA	11300000	28800000	65900	42800	39200000	112000	362000	36600000	3920000	2170000	15000000	750000	0	15500000	1350000	68100	551000	481000	36500000	3570000	5290000	NA
SSPLIPLR	1890000	36800	28100000	4080000	16300000	251000	30300000	27200000	555000	1670000	105000	361000	14500000	19700000	15200000	52100000	372000	110000	14300000	20400000	229000	18600000	12100000	8840000	18600000	329000	2560000	20800000	27500000	3600000	14900000	519000	20900000	10500000	24100000	20100000
ATVLIDDPALDAR	2410000	315000	1840000	1680000	365000	3580000	3250000	126000	1510000	1280000	741000	NA	634000	722000	717000	1580000	840000	585000	113000	943000	1810000	1520000	1580000	519000	84200	2150000	1240000	795000	1190000	261000	3600000	3320000	361000	170000	129000	610000
DASAASIYGAR	10300000	1780000	10800000	10300000	7900000	8210000	13400000	18200000	13400000	8860000	8340000	3850000	7010000	9260000	15400000	23600000	28700000	23300000	25400000	30300000	28800000	32800000	26700000	30200000	36400000	40100000	29300000	48000000	63600000	56300000	52500000	44100000	25700000	49100000	58500000	49700000
LDQAQYR	NA	347000	41300	0	354000	16100000	16600	84900	13700000	287000	NA	368000	57100	0	4910	87200	224000	13800000	33800	11600000	NA	10800000	9080000	112000	NA	6880000	17400	NA	75000	8730000	14200000	13900000	0	NA	1950000	12800000
FGSDLDAATK	2170000	2560000	1270000	2210000	2230000	1790000	2110000	1830000	790000	1520000	2000000	2400000	923000	1930000	1470000	2280000	NA	3110000	2850000	179000	337000	1790000	519000	605000	4250000	793000	1920000	1750000	862000	1490000	5350000	2940000	3190000	2320000	3230000	1770000
VQNYEGVCIAR	4080000	1010000	15400000	11400000	15900000	1870000	11100000	6770000	NA	3010000	7380000	17400000	1370000	1210000	2510000	5300000	1220000	1660000	12000000	4870000	1170000	9320000	22500000	13600000	3180000	3460000	903000	9320000	3900000	2160000	7150000	NA	8160000	6490000	7180000	25200000
ISFGEGVER	23200000	145000	46000000	39700000	37300000	19600000	41600000	36800000	32000000	22500000	11200000	143000	980000	25700000	415000	937000	591000	31300000	32500000	19300000	13500000	31900000	169000	28800000	31900000	17100000	19200000	29000000	24300000	16900000	18500000	24100000	166000	25400000	43500000	38600000
ELTSGSYFGEPR	2210000	2490000	1010000	120000	1380000	43300	1320000	770000	NA	1690000	1130000	2210000	53700	33500	49400	1560000	6100	217000	3940000	1280000	NA	1720000	2070000	5470000	4760000	0	286000	3240000	3420000	967000	5210000	4530000	3050000	2710000	3050000	2680000
CAADGVTDTCR	308000	821000	2430000	490000	1000000	106000	1060000	1060000	1240000	156000	69400	1180000	445000	181000	796000	0	0	190000	47800	112000	128000	477000	39800	246000	230000	28000	0	62000	137000	0	0	48700	0	70700	0	188000
VGSIVNGLVK	4200000	7860000	1650000	4830000	3570000	8180000	2450000	4270000	1620000	2250000	NA	6400000	3580000	3560000	972000	4610000	1180000	7040000	6990000	2030000	837000	3570000	5970000	3780000	4250000	NA	1430000	4320000	1170000	1870000	537000	2240000	1840000	3290000	7550000	5340000
GPQIFLSR	21000000	24400000	14500000	26600000	20800000	19300000	20100000	14600000	7790000	22500000	26900000	22100000	16700000	14600000	413000	21100000	971000	1440000	38000000	23800000	1160000	25700000	22600000	29000000	24100000	51600	1110000	19900000	30100000	18500000	23400000	32000000	17400000	24000000	26900000	29300000
QINESGGVLGR	79800000	24600000	10800000	496000	16300000	14800000	793000	7310000	3220000	2020000	731000	736000	4200000	1780000	107000	339000	443000	2940000	670000	768000	920000	1060000	567000	2030000	417000	30800000	271000	3990000	29600000	1060000	47800000	40200000	367000	333000	240000	18200000
YIQEDGASDWPTFAEK	33000	0	73600	0	201000	89100	378000	383000	424	36100	85000	1120000	322000	0	0	1940	163000	35800	84900	206000	56600	93300	0	430000	716000	2970000	44200	707000	1930000	37000	5340000	4510000	38100	226000	0	444000
IVAAQEDNVDR	4070000	4950000	2380000	3770000	1880000	4560000	6690000	4080000	5170000	3300000	4880000	7530000	3740000	2760000	1750000	15000000	30500000	12700000	7150000	9360000	13200000	8010000	1370000	4780000	5210000	6320000	7680000	2320000	5430000	2130000	3940000	4440000	2050000	1420000	10800000	10800000
ANLTQSVVSAQIPGR	275000	2580000	3070000	722000	1820000	1550000	428000	1080000	1530000	NA	474000	972000	499000	199000	541000	900000	10300000	992000	1030000	3130000	3890000	1170000	372000	834000	166000	2870000	403000	697000	941000	335000	454000	2340000	2840000	362000	514000	2530000
VSGPVPLPTQIGR	270000	45700	151000	56900	124000	303000	17700	46700	539000	237000	313000	234000	107000	0	60700	103000	1540000	1310000	149000	4730000	7650000	3320000	3660000	80200	82000	14600000	671000	177000	7990000	475000	21500000	17000000	1460000	174000	163000	4820000
DISGANQFTSNAPR	229000	28200	767000	NA	822000	249000	541000	1620000	338000	53500	29800	10700	266000	34600	62100	129000	111000	16600	89900	621000	525000	499000	525000	91300	736000	285000	252000	173000	1290000	97700	236000	247000	0	232000	257000	168000
STQGQGLLPDGSTR	371000	690000	0	51900	977000	107000	2340000	81400	49700	524000	1770000	1120000	74700	0	1410000	523000	0	75200	3930000	956000	90000	2680000	22000	2810000	2640000	29600	39500	2290000	515000	47300	0	498000	0	1340000	39700	2160000
IQNAGTEVVEAK	8210000	8910000	4420000	5140000	6600000	8310000	6740000	4990000	5710000	963000	3230000	10200000	11500000	7870000	6060000	2850000	7440000	8180000	1560000	852000	3610000	1210000	2770000	2960000	4410000	3950000	1420000	3100000	938000	5220000	3420000	3960000	1990000	2820000	1640000	1930000
IVESQGPNIESK	11800000	613000	1830000	1330000	5760000	14100000	8650000	5380000	2080000	694000	5260000	9460000	NA	620000	147000	1830000	NA	9280000	357000	3440000	1570000	1410000	1520000	2610000	2890000	383000	371000	999000	362000	2990000	3180000	3500000	1390000	687000	2520000	1460000
VACETFATTNR	2150000	334000	1490000	671000	2060000	149000	2210000	1670000	151000	812000	1190000	95100	242000	810000	1790000	555000	134000	1720000	1710000	900000	83200	885000	1700000	2890000	4300000	1500000	26800	2060000	885000	58400	1640000	3150000	1920000	876000	2120000	4040000
FVIGGPDGDAGLTGR	2380000	204000	2060000	133000	459000	1260000	72400	296000	184000	0	540000	NA	134000	115000	37500	195000	138000	594000	443000	2500000	3270000	2080000	116000	3820000	843000	104000	163000	194000	NA	252000	318000	4180000	2880000	361000	2270000	976000
GVNILADAVK	24200000	23000000	8210000	19500000	11800000	1740000	13700000	10200000	382000	24700000	37200000	27500000	553000	1600000	12100000	20900000	798000	157000	30000000	582000	442000	22000000	8610000	11700000	11700000	771000	10300000	9660000	576000	331000	788000	1840000	10700000	14800000	13400000	7750000
SFGAPTVTK	56800000	1030000	7740000	21800000	9650000	36500000	15500000	10900000	11200000	18200000	22100000	18600000	15900000	10500000	11800000	10900000	34800000	40600000	51300000	27900000	22200000	13700000	22400000	38300000	31600000	41300000	27000000	21000000	31400000	29800000	50700000	51800000	37900000	18100000	63300000	29600000
AAVKEGIVPGGGVALIR	3020000	5730000	4650000	2510000	3910000	8280000	7260000	8360000	0	8870000	10400000	8670000	5140	186000	66400	878000	19400	986000	3160000	3320000	4410000	2060000	437000	2290000	3760000	0	63900	0	1220000	490000	2580000	657000	420000	2490000	197000	461000
SVIEAGNNFGR	1300000	7050000	5690000	2330000	4690000	409000	2380000	1660000	232000	296000	717000	1150000	4750000	3490000	67300	3280000	140000	0	5150000	714000	1520000	3730000	2220000	3800000	4490000	817000	92600	1880000	771000	1350000	1930000	751000	16700	960000	2840000	2840000
QFLPDVYEK	466000	337000	675000	464000	796000	425000	1380000	1500000	482000	578000	322000	978000	448000	804000	15500	426000	185000	1070000	2190000	459000	448000	1470000	407000	935000	3330000	2670000	564000	1800000	2290000	3240000	8240000	8810000	4220000	469000	2780000	872000
TSGGVPTGPVLK	650000	621000	504000	1030000	1280000	505000	1990000	652000	2130000	1580000	1960000	1060000	932000	699000	2400000	2200000	2390000	NA	657000	1420000	2180000	1770000	484000	770000	897000	2740000	1630000	3810000	659000	3510000	3660000	4040000	2320000	3130000	3300000	3370000
VQEPQFEGQTK	10100000	4210000	5880000	5140000	5690000	5700000	6660000	3480000	3330000	2300000	5400000	2870000	4230000	2830000	1620000	2260000	4260000	4690000	6430000	5230000	685000	1310000	1790000	2820000	4250000	3760000	1100000	2440000	1980000	1960000	3430000	1740000	1380000	2960000	855000	2460000
FAISTEETR	10600000	13200000	12300000	2180000	11800000	9490000	1940000	20700000	NA	1480000	13800000	11500000	19100000	15300000	13900000	18600000	1770000	1570000	18700000	8760000	NA	17600000	15200000	17100000	20500000	20400000	11800000	17600000	18100000	17500000	26400000	27400000	19800000	15500000	18000000	15600000
IDAALPEGASDLPGVIVPR	143000	65800	312000	308000	2660	1780000	2000000	2180000	76000	515000	654000	223000	64900	0	0	4650	0	667000	50100	1540000	3450000	1780000	43400	3130000	4470000	375000	0	4910	1010000	512000	6570000	6990000	1670000	2390000	91900	922000
VIDGTFPDYTR	17100000	240000	5100000	4640000	8070000	5170	1840000	13000000	1280000	13200000	16700000	7690000	15500000	291000	32600	4920000	2760000	NA	26300000	2470000	15700000	11800000	7340000	15600000	18100000	NA	2230000	8390000	8270000	6460000	19000000	27600000	17200000	6650000	15700000	14700000
VATVSSER	1460000	1540000	1620000	865000	1090000	1600000	1090000	1270000	8590000	530000	6390000	510000	1000000	526000	292000	1410000	1770000	1940000	1240000	NA	NA	9720000	589000	1140000	2700000	6640000	664000	5650000	939000	1280000	1100000	168000	546000	135000	988000	498000
EVIDLGDGR	12800000	5650000	2320000	22900000	13300000	1990000	17400000	16600000	19400000	10200000	3640000	7430000	2950000	1510000	1390000	23000000	11200000	16200000	4360000	12200000	NA	14000000	16200000	8280000	9360000	1530000	11400000	14200000	16800000	2920000	16600000	8260000	17800000	14400000	22400000	17800000
AANYASEDGIR	485000	125000	1040000	57000	786000	383000	1600000	1110000	202000	648000	197000	565000	102000	64000	0	957000	410000	212000	507000	1310000	NA	2850000	3720000	5710000	NA	6300000	2950000	395000	2880000	9100000	10300000	9850000	9360000	7320000	13500000	10600000
ILTETDNALTR	806000	1180000	1590000	239000	1720000	1050000	2110000	1420000	2940000	569000	1170000	341000	41100	0	234000	1290000	1340000	2240000	1620000	455000	747000	1470000	1130000	1840000	208000	1340000	463000	2440000	1900000	130000	1990000	2030000	450000	3060000	118000	1760000
YVVNATNDGSR	4690000	3440000	2850000	1040000	2640000	3410000	4430000	4700000	4160000	2570000	1880000	2950000	3360000	1560000	1190000	1120000	883000	597000	1120000	170000	807000	632000	226000	569000	855000	447000	0	335000	914000	245000	707000	518000	60800	292000	888000	427000
DATAGIYGVR	76900000	87400000	67200000	41900000	44500000	41800000	66400000	67800000	53900000	34500000	33000000	32300000	45600000	39700000	30700000	36500000	38200000	36000000	39400000	32800000	32100000	34100000	24600000	39600000	33200000	34700000	21500000	470000	30400000	30900000	31900000	27900000	35200000	356000	40600000	26900000
DGSSNFSPENK	3630000	4130000	8830000	940000	5720000	3230000	8100000	9840000	7160000	447000	2430000	3610000	5060000	3790000	507000	4490000	525000	633000	631000	1410000	2230000	972000	299000	944000	2140000	877000	1040000	509000	1180000	1450000	631000	926000	890000	745000	664000	525000
LVNEAQAYSNGIIPEAR	971000	3280000	2250000	231000	1470000	NA	4600000	2690000	27600	2550000	2970000	2360000	3440000	59900	57500	40800	139000	3320000	0	1810000	4020000	3590000	582000	5190000	5070000	5890000	170000	1570000	2280000	376000	6410000	6670000	2720000	2580000	0	2400000
TIELANAYR	17800000	11700000	1970000	6380000	1560000	89500	6030000	3160000	NA	6770000	3380000	6610000	427000	1820	0	1650000	247000	70500	7550000	NA	106000	7880000	4340000	7560000	7710000	436000	2090000	3050000	7140000	NA	13600000	10500000	8780000	5070000	12400000	7760000
DAADAATTAIR	1960000	202000	836000	811000	3760000	6000000	7880000	6540000	1480000	2290000	656000	443000	1280000	296000	697000	546000	2360000	1770000	2420000	2150000	2110000	1930000	1770000	3760000	1040000	634000	1430000	406000	2190000	989000	3870000	2350000	4120000	3520000	835000	2010000
TPDCGGSYIK	6840000	0	263000	1900000	3720000	4590	4830000	2080000	1450000	1050000	583000	76100	28600	0	0	0	29200	13100	0	603000	9070	769000	49100	932000	317000	46500	0	1140000	521000	46400	94600	1500000	62200	460000	99700	736000
ELGNENIDVINYTK	43500	0	185000	369000	154000	339000	279000	100000	136000	69000	0	0	2330	0	0	0	1010000	67700	0	0	34200	66100	54600	307000	19900	34500	0	0	70000	0	353000	159000	93900	62000	0	0
DASAAAIYGAR	6490000	1440000	15400000	8150000	9660000	5860000	12400000	17900000	13500000	9980000	11400000	575000	13200000	12300000	4410000	8400000	5120000	3450000	4540000	3180000	2020000	4900000	1940000	3450000	7400000	1880000	1100000	3490000	7770000	3010000	3100000	2270000	4130000	2960000	5290000	2540000
AVNPDVQFK	6300000	2410000	8230000	391000	6200000	NA	3990000	7560000	4170000	6950000	3210000	2770000	NA	8070000	593000	8830000	355000	NA	4130000	NA	2100000	NA	5630000	15000000	10000000	1680000	2830000	8000000	1950000	7950000	19400000	21700000	2030000	2440000	7020000	4980000
LAAEDPSFR	42600000	32900000	7710000	26700000	8510000	40500000	23700000	20000000	10500000	51700000	37800000	50000000	19700000	2810000	15600000	23400000	42800000	45200000	45700000	27200000	36800000	20400000	18300000	30000000	25300000	15800000	42400000	49900000	17000000	65600000	33400000	19200000	20600000	43400000	33400000	30200000
IYEGTNEINR	14200000	17100000	14300000	9730000	16800000	6470000	13800000	15100000	370000	9300000	9180000	9900000	12300000	9570000	3790000	9780000	616000	1130000	6580000	8810000	1580000	8610000	7980000	7970000	4160000	9120000	5960000	6510000	12500000	8520000	8410000	7720000	4740000	8630000	12900000	12300000
VIENSEGAR	333000	745000	46900	22000	648000	1330000	NA	211000	1170000	262000	867000	334000	1270000	2200000	41900	529000	635000	146000	627000	206000	1850000	NA	43400	158000	337000	658000	0	601000	0	1090000	451000	NA	34300	202000	285000	157000
CETACPTDFLSVR	0	1260000	35900	161000	118000	0	6260000	3030000	0	2850000	50200	6660000	5060000	4170000	0	758000	0	0	1620000	0	28400	41300	0	614000	653000	0	0	72200	116000	0	105000	569000	184000	1070000	100000	128000
DDLLGINLK	0	12300000	0	0	8420000	0	14300000	12100000	0	4090000	5890000	3680000	0	5900000	0	12200000	22300	0	8470000	0	0	9620000	2670000	6240000	11200000	0	0	4170000	0	0	0	0	12300000	6350000	0	0
DGGAEIVGLLK	2110000	5970000	NA	1750000	2390000	2380000	NA	4270000	13600	2860000	6480000	5640000	2040000	1300000	256000	8280000	0	0	12000000	7330000	0	NA	NA	3410000	5600000	0	2590000	3440000	7940000	6750000	4970000	9220000	6030000	6530000	NA	NA
AAEANASPAVK	7540000	8770000	28200000	1550000	40700000	3910000	10600000	40000000	14300000	847000	797000	1550000	11400000	10200000	3030000	11000000	1030000	3530000	3080000	774000	588000	1080000	1100000	1470000	2170000	37100	61800	850000	1140000	239000	129000	566000	554000	144000	1820000	371000
EINSADDLQGLK	4680000	67100	7910000	2170000	5850000	4210000	9450000	198000	6530000	3440000	273000	790000	7910000	0	5690000	1840000	6300000	4460000	183000	NA	2640000	4320000	4610000	10700000	9210000	8270000	497000	9850000	14700000	11900000	11000000	6490000	4360000	8900000	6820000	5940000
IPGLGGDVLAK	11000000	15300000	783000	5340000	NA	350000	13800000	6330000	617000	8690000	8590000	12300000	11100000	15900000	1520000	8920000	168000	991000	3000000	1320000	2130000	7680000	7250000	NA	16200000	958000	8040000	21600000	NA	25200000	20000000	23300000	23900000	22100000	9400000	8670000
VNAISAGPIK	8130000	478000	3640000	7560000	5410000	6340000	6520000	5980000	6500000	6630000	291000	4250000	836000	6540000	5090000	256000	5760000	6250000	184000	7790000	3110000	77800	750000	224000	8680000	6900000	1200000	331000	6040000	6690000	7710000	10200000	7730000	671000	11900000	315000
NPVLTENLTGLAR	2900000	9360000	1260000	3310000	11300000	389000	5410000	4620000	1930000	384000	9420000	3270000	1400000	8860000	3710000	2060000	1670000	2090000	11200000	1560000	1230000	5130000	3660000	2790000	703000	2770000	2340000	1760000	1970000	NA	11300000	1850000	793000	5100000	2400000	6420000
AAEVDTLGDLVSFNK	537000	53100000	22400000	6090000	19800000	527000	29400000	21700000	895000	28800000	25500000	26000000	18200000	10900000	2300	17100000	265000	935000	25800000	405000	291000	19900000	4500000	17600000	22500000	230000	0	14400000	197000	87600	4070000	258000	14400000	22800000	2590000	4770000
VDDALNATR	124000000	117000000	64800000	129000000	68800000	118000000	112000000	97700000	112000000	98300000	107000000	97700000	95300000	88500000	1300000	91200000	160000000	164000000	173000000	94000000	116000000	122000000	102000000	150000000	124000000	112000000	135000000	88900000	127000000	118000000	135000000	165000000	143000000	102000000	205000000	130000000
GVAIAGFGPLVER	3090000	87700000	2370000	27700000	43900000	46000000	606000	4300000	56300000	1480000	93600000	5600000	58300000	41900000	50300000	3300000	3510000	86700000	11200000	2440000	6040000	74100000	17100000	39200000	986000	2800000	650000	33000000	1290000	1130000	776000	5450000	30100000	57400000	2110000	5100000
ALLTEVGYGK	18300000	32400000	26100000	20400000	884000	2880000	44400000	26100000	2420000	18500000	20900000	17100000	15800000	21600000	1860000	20000000	2590000	1550000	14500000	3830000	2500000	14700000	7250000	2230000	19500000	5250000	9510000	15300000	NA	NA	21400000	NA	16200000	21900000	18000000	15400000
QDFQALIK	10500000	53000000	74800000	13900000	67400000	13500000	103000000	95600000	1090000	13400000	16900000	39900000	2040000	52500000	1930000	59900000	7590000	3870000	3340000	44300000	814000	15600000	15500000	24700000	46100000	8990000	8940000	39400000	1190000	32400000	19900000	14400000	33200000	32800000	9540000	19400000
CGGEPKPSSQWQGENINR	604000	629000	5100000	430000	925000	842000	1170000	2690000	1950000	147000	579000	456000	134000	2770000	1710000	2330000	409000	24200	41600	1700000	186000	195000	89200	286000	1710000	123000	400000	3580000	1210000	1400000	1470000	1730000	731000	1600000	1520000	378000
DIELQSEAQR	25600000	9120000	2140000	11800000	11000000	9200000	38200000	29700000	13400000	21300000	21200000	2360000	4140000	3870000	15300000	27900000	10700000	296000	6230000	33700000	857000	15600000	4700000	7640000	NA	8970000	17700000	4290000	29300000	3630000	24100000	20000000	13400000	5280000	46700000	28300000
SVIVVGPELK	16800000	48300000	41200000	24700000	43000000	30300000	35100000	35300000	40900000	14600000	24800000	27700000	24000000	375000	32400000	53300000	837000	43500000	50600000	29000000	28300000	39300000	24500000	23500000	31300000	26500000	14600000	20700000	47700000	12900000	25100000	23100000	15600000	30600000	38600000	40900000
EDAANNYAR	22300000	22800000	13500000	13900000	17100000	15500000	23700000	25800000	40800000	21400000	13400000	20100000	20000000	14800000	12500000	14500000	20700000	14700000	9870000	16600000	14400000	9870000	6580000	7970000	14000000	8090000	10900000	11300000	8910000	25700000	16600000	15100000	9850000	11100000	11000000	10600000
EVVDLVLDR	0	8170000	1270000	533000	6980000	217000	11200000	4560000	441000	891000	550000	2470000	371000	2410000	2270000	4800000	0	214000	494000	192000	788000	17800	0	517000	1010000	0	76900	1500000	261000	673000	659000	66000	43800	1820000	0	71800
LSVDYGR	89900000	3930000	152000000	102000000	170000000	81000000	146000000	177000000	211000000	4460000	65000000	1200000	538000	1050000	84300000	130000000	66200000	43000000	47100000	74900000	55400000	67900000	60200000	59600000	54200000	59700000	225000	62000000	80000000	91100000	2580000	4420000	6490000	86800000	45900000	54400000
DVNASIATVK	66600000	67700000	75400000	32200000	125000000	81700000	111000000	115000000	153000000	91400000	73000000	82600000	4300000	97900000	4330000	17000000	70100000	64300000	736000	99000000	84000000	72700000	60600000	71900000	66500000	46000000	47600000	42700000	92000000	70300000	65000000	77200000	54200000	33100000	71600000	60400000
SYELPDGNVITIGNER	3010000	25000000	16400000	6160000	10900000	21000000	22500000	14900000	17600000	15600000	11400000	19300000	14600000	9930000	6570000	2440000	4820000	4370000	3680000	4770000	6370000	3340000	1470000	9350000	10900000	6320000	450000	4570000	2050000	5900000	10100000	5530000	1560000	5180000	276000	1260000
AGFAGDDAPR	336000000	221000000	162000000	106000000	165000000	284000000	258000000	194000000	250000000	271000000	265000000	9610000	2620000	7210000	168000000	132000000	213000000	258000000	248000000	271000000	259000000	157000000	217000000	319000000	202000000	187000000	234000000	4110000	108000000	233000000	237000000	213000000	591000000	116000000	135000000	228000000
AQIVIPNGPR	2720000	2730000	815000	1430000	917000	3320000	1380000	2180000	2000000	2860000	4860000	325000	2250000	3410000	1640000	2230000	287000	1170000	5730000	1370000	467000	2560000	1750000	1200000	3020000	4670000	1870000	2740000	590000	945000	2640000	430000	163000	642000	2320000	1100000
LITGASPLASNELGK	3500000	535000	761000	346000	1030000	10600000	1560000	1330000	4710000	2140000	1590000	666000	904000	388000	145000	1320000	8850000	3610000	1390000	1600000	2920000	6100000	482000	501000	524000	326000	386000	240000	7740000	104000	6850000	302000	463000	412000	2060000	809000
AALQLAQSGYK	5400000	6710000	3420000	976000	5890000	1360000	3940000	4890000	4150000	1230000	2850000	2480000	5680000	3290000	0	1950000	2700000	6300000	2130000	475000	1240000	1030000	946000	3540000	3810000	470000	86100	2800000	1570000	537000	3870000	2070000	1950000	2310000	6400000	2410000
LPGILELSR	272000	30300000	15900000	543000	22800000	255000	22700000	21600000	1980000	647000	127000	631000	17500000	7930000	13900000	14800000	305000	19000000	34000000	219000	30800	18000000	9030000	3750000	21200000	81700	735000	6490000	861000	1610000	585000	189000	5680000	11300000	424000	666000
VLENAEGAR	61400000	24300000	10800000	23100000	31700000	44300000	20500000	22000000	22900000	29900000	39800000	27700000	32600000	18300000	15300000	13600000	27300000	59500000	78600000	28900000	19300000	12900000	12100000	19100000	27000000	14000000	8330000	8530000	5120000	11100000	25000000	39700000	24900000	3500000	50500000	21100000
TDSLGAGLTK	18800000	13600000	4060000	10800000	3970000	7990000	7480000	7370000	6230000	5470000	8880000	9970000	2540000	7280000	1120000	3290000	3000000	6350000	27100000	5560000	4230000	5130000	5760000	15500000	10300000	5910000	6870000	8670000	6270000	10300000	6600000	5760000	8200000	4990000	18600000	7910000
DLLPLIEGTTVSTK	610000	1260000	501000	726000	947000	46300	558000	1120000	0	764000	855000	1940000	643000	336000	1030000	2990000	33500	25200	228000	776000	0	2390000	180000	546000	992000	0	0	887000	324000	44900	2150000	149000	794000	713000	877000	870000
LNFDNGDLTSGAIK	624000	1780000	1110000	760000	2060000	1670000	611000	1490000	1370000	1100000	315000	1260000	1760000	1280000	1410000	383000	453000	1690000	696000	2200000	949000	788000	984000	822000	1810000	1400000	1690000	563000	1250000	936000	253000	4470000	804000	146000	835000	3010000
TLVLINGK	115000000	63900000	75800000	51400000	91300000	112000000	139000000	115000000	96500000	69400000	58400000	49500000	61000000	40200000	2970000	43100000	926000	52500000	62400000	2990000	47500000	49500000	30000000	1790000	35900000	39400000	29700000	32500000	68300000	38500000	42400000	34900000	28500000	24200000	1320000	52700000
NQSAQVYLNR	5900000	219000	265000	3350000	9160000	895000	9340000	6180000	353000	3940000	1120000	320000	543000	39900	301000	85700	65800	749000	1040000	1850000	410000	3320000	111000	1610000	4780000	553000	173000	435000	2680000	1140000	3660000	3180000	3320000	349000	3060000	2740000
SNILLIGPTGSGK	8410000	558000	943000	5870000	6580000	712000	7880000	1150000	1230000	4100000	1290000	864000	6360000	5230000	743000	1920000	0	2300000	12100000	1580000	1170000	1070000	4810000	2330000	6960000	1080000	708000	4170000	3920000	1690000	5280000	456000	4280000	2490000	2010000	NA
TLLAETLAR	17000000	26500000	941000	2040000	1220000	3000000	19100000	19800000	0	12500000	3620000	14400000	16000000	11400000	1430000	13000000	244000	589000	5360000	4940000	4280000	10500000	638000	3240000	5500000	0	1590000	12300000	12000000	2430000	16300000	7310000	13800000	2870000	3260000	12400000
NNENVVGSGPFK	5700000	147000	915000	4840000	7140000	213000	13900000	12500000	796000	6440000	286000	612000	77400	112000	0	410000	498000	1170000	NA	758000	1020000	754000	1420000	11000000	11800000	261000	1350000	40100	4310000	7060000	4300000	984000	5620000	3660000	2430000	3630000
LNGEGAAGVGPTAGSK	2800000	534000	2350000	282000	1170000	0	2850000	3980000	0	0	34800	141000	1500	0	0	876000	0	35400	47700	359000	0	192000	138000	215000	604000	0	34600	21700	181000	56300	113000	238000	54300	33000	303000	81100
VNNLGFIETPYR	540000	NA	127000	6610000	8930000	847000	16700000	13300000	0	NA	8240000	732000	11600000	658000	159000	9750000	0	0	NA	1680000	0	NA	4040000	2950000	12400000	0	34200	8520000	338000	234000	272000	2670000	2940000	9430000	2360000	505000
AVGQDSFQPK	59600000	2690000	26400000	14200000	43000000	52400000	57400000	47400000	36100000	43000000	37700000	44700000	53700000	30400000	22500000	30600000	55300000	80000000	81200000	59300000	46000000	29000000	21300000	49200000	41700000	39000000	31600000	24300000	55100000	19700000	39800000	62900000	33800000	18300000	60400000	54900000
ELTGNGILGK	162000000	4230000	35000000	68100000	37200000	124000000	47700000	43100000	50800000	75000000	75600000	20000000	4690000	5350000	12500000	33800000	117000000	130000000	12900000	59500000	88500000	61700000	57600000	151000000	118000000	134000000	55800000	40500000	66300000	49900000	106000000	125000000	71800000	37200000	92300000	3230000
LLQASEYNVER	2440000	246000	2550000	1710000	3780000	5460000	5550000	3940000	4270000	5650000	6520000	144000	86400	0	0	2240000	4720000	9540000	11800000	5840000	3020000	3720000	3270000	6240000	7350000	5790000	1060000	2900000	4190000	735000	5600000	5990000	910000	1510000	7850000	7300000
FADNPFPEIR	11000000	3180000	27600000	1900000	NA	568000	44000000	29600000	26200	28400000	148000	1510000	22900000	695000	493000	15900000	0	0	1140000	1800000	0	11700000	1810000	11000000	14900000	0	260000	5470000	4440000	1750000	15200000	523000	3720000	15500000	2940000	2590000
VNVGNPGSGQR	45000000	34600000	35600000	28500000	38900000	37600000	49800000	58200000	51800000	42900000	43000000	38000000	36900000	30800000	24900000	21600000	31900000	32600000	26700000	26700000	29600000	17300000	10100000	27400000	21400000	31700000	16900000	17400000	17100000	35000000	24700000	16600000	8560000	27700000	13300000	18500000
DAYVGDEAQSK	38900000	167000	19700000	12300000	17300000	38700000	24600000	22100000	29700000	34200000	25900000	32200000	26700000	16300000	16300000	382000	16500000	20800000	15200000	12200000	19100000	8950000	5100000	10300000	10500000	11400000	7590000	7630000	3870000	17900000	15200000	14600000	5810000	6470000	6870000	387000
GYSFTTTAER	172000000	326000000	310000000	117000000	160000000	151000000	307000000	266000000	296000000	196000000	164000000	191000000	310000000	266000000	1250000	264000000	173000000	129000000	147000000	206000000	166000000	155000000	116000000	151000000	184000000	110000000	210000000	144000000	123000000	301000000	173000000	111000000	84900000	146000000	105000000	187000000
LNVVEAFR	0	611000	7680000	3810000	1330000	0	2460000	1220000	0	14600000	80600	NA	11700000	796000	925000	1510000	85300	0	373000	0	0	17900000	716000	NA	1730000	0	0	NA	0	0	0	0	766000	1480000	2860000	1000000
VVIDSPSIVAR	2860000	467000	5110000	1370000	4090000	NA	345000	344000	3490000	2710000	146000	286000	71500	949000	143000	3380000	1600000	4320000	986000	257000	1100000	NA	1300000	352000	533000	NA	717000	NA	397000	1260000	1200000	784000	1610000	2330000	1300000	1430000
EVSGGGAVTLPGIGK	17100000	1270000	4680000	10400000	4550000	48800000	8160000	2970000	4540000	40200000	37400000	22400000	8820000	1440000	1220000	3620000	NA	NA	82000000	NA	NA	NA	20300000	54300000	NA	NA	NA	23200000	44900000	25200000	75700000	104000000	63200000	24700000	24200000	47800000
LALDADDTQR	2880000	2720000	2450000	2790000	4090000	6710000	1370000	1720000	385000	3770000	2750000	283000	2910000	2840000	2130000	2510000	NA	710000	7030000	2200000	NA	9050000	1990000	6650000	2240000	1010000	11000000	1930000	2520000	5630000	4600000	2450000	1350000	7910000	2080000	2170000
LTSDFDALDVANR	28500	32400	1470000	125000	46000	37100	1390000	36300	1190000	88000	40000	214000	45500	0	0	0	121000	43000	0	111000	905000	840000	0	206000	33700	340000	78500	19700	237000	613000	1420000	968000	0	540000	88300	761000
WVLDAAGVGPSSGSR	1270000	13800000	15900000	277000	6650000	717000	25800000	19800000	1080000	4970000	4620000	5170000	9940000	7920000	78300	14000000	57200	295000	9300000	8830000	1210000	5320000	682000	6460000	2120000	477000	141000	950000	2680000	252000	2490000	2460000	874000	551000	4880000	4050000
EWFALNR	0	71400000	587000	341000	45200000	515000	35300000	28400000	0	22200000	27800000	34400000	40800000	24700000	48800000	42500000	315000	77300	55600000	41100	0	52000	9470000	21800000	19600000	0	0	3140000	0	0	421000	0	14200000	5710000	315000	809000
DGAAAIYGAR	42800000	63600000	61200000	38200000	33200000	55600000	110000000	117000000	105000000	42100000	56600000	81000000	84400000	83900000	75400000	144000000	108000000	100000000	101000000	120000000	97900000	116000000	93800000	77800000	96300000	102000000	79600000	47700000	137000000	61200000	79400000	79700000	83300000	48500000	112000000	124000000
LGALLPLNAK	5830000	12400000	20700000	19700000	21600000	883000	12700000	15300000	1270000	4950000	7630000	3660000	11100000	11700000	806000	18300000	931000	245000	9060000	6310000	245000	8150000	10300000	7840000	9790000	41900	4590000	8620000	6010000	3700000	5490000	4980000	4060000	7600000	7730000	6490000
APFELVNR	9710000	2110000	28100000	23000000	NA	960000	15700000	19100000	NA	6580000	9710000	3470000	1070000	1140000	1530000	26300000	1010000	539000	11900000	8560000	1000000	8240000	12900000	8910000	3430000	339000	4860000	991000	8590000	4480000	6160000	8730000	2880000	8190000	13600000	12000000
GYYGDLTEK	234000	1370000	677000	674000	28900000	24900000	35000000	28900000	35700000	27400000	260000	839000	37400000	30900000	1220000	46300000	34600000	36800000	6240000	889000	24900000	19900000	182000	21100	241000	30600000	71100	196000	166000	343000	40600000	42000000	40400000	281000	656000	480000
IYAEAER	14900000	419000	18400000	14400000	23100000	27500000	26600000	311000	28200000	NA	175000	606000	852000	169000	0	530000	36300	34100000	6250000	19100000	27700000	8100000	34900000	3080000	NA	33000000	NA	32400000	39500000	29700000	44500000	46500000	369000	1310000	76400000	20100000
VSEGDVIEVR	1820000	5210000	1540000	1410000	4530000	5050000	1080000	3640000	NA	592000	5210000	5900000	3290000	4700000	517000	4220000	81300	917000	12300000	1080000	4740000	5630000	4310000	7640000	9780000	3030000	666000	7290000	1410000	1750000	9980000	7340000	9550000	3710000	9730000	5000000
ISGLIYEETR	332000000	1450000000	1370000000	645000000	1600000000	890000000	1580000000	2060000000	1110000000	948000000	1100000000	964000000	928000000	1030000000	815000000	1670000000	145000000	406000000	715000000	585000000	520000000	896000000	425000000	582000000	929000000	470000000	324000000	953000000	543000000	933000000	725000000	880000000	762000000	1350000000	285000000	514000000
VFLESVIR	482000	154000	53300000	176000	228000000	66400000	164000000	150000000	1500000	77600000	33100	114000	108000000	72700000	64900000	723000	589000	100000000	177000	304000	751000	292000	31000000	51400000	135000	0	44700	225000	124000	44000	103000	25600	50700	28500000	233000	316000
AGENCGLLLR	14500000	775000	6790000	20600000	17100000	745000	12400000	7490000	2350000	11100000	16900000	8200000	1310000	902000	11100000	2640000	2120000	2060000	NA	7940000	1960000	19300000	23700000	NA	NA	249000	227000	NA	1870000	2570000	2370000	7380000	NA	17600000	25400000	36700000
ILEVPTGPELLGR	5420000	2020000	13600000	1460000	10600000	784000	3470000	1470000	0	22600000	1700000	696000	299000	624000	54300	1060000	0	233000	589000	11100000	463000	7880000	2070000	990000	455000	0	688000	627000	823000	938000	NA	1480000	544000	7530000	689000	846000
VVDALGNPIDGK	33300000	28400000	31200000	27300000	16600000	29200000	31800000	30000000	27700000	29100000	31500000	19600000	24300000	13000000	19100000	16500000	25800000	26700000	25800000	22000000	23300000	23700000	17400000	23000000	25900000	205000	13200000	20900000	18800000	26200000	27300000	24600000	29400000	18800000	32200000	29600000
VGLFGGAGVGK	559000	79900000	37100000	50200000	44300000	25700000	48600000	42500000	16900000	30400000	54700000	33600000	41500000	46700000	35900000	41200000	2530000	498000	78500000	35900000	165000	34300000	22800000	41900000	49300000	5030000	24000000	30900000	27500000	32700000	1140000	39000000	42800000	20400000	49900000	52400000
NNPVLIGEPGVGK	7510000	6210000	739000	3860000	6090000	1980000	7020000	1210000	2040000	9380000	14300000	7240000	6570000	3870000	3490000	11600000	1060000	1970000	12600000	2200000	1650000	948000	1760000	832000	6760000	1570000	2930000	5770000	6860000	561000	6430000	1050000	274000	1140000	6970000	9060000
VIDLLAPYAK	4690	12800000	0	0	778000	0	17900000	13100000	0	12600000	13900000	2080000	2140000	8000000	37600	NA	3190000	0	12900000	1560	0	9570000	4240000	3400000	12600000	0	0	1170000	59000	34800	23600	54800	5320000	6570000	0	0
AISELGIYPAVDPLDSTSR	0	3270000	4200000	0	4700000	969000	10500000	7500000	0	7800000	2710000	3880000	6270000	1330000	0	1620000	0	0	3610000	2020000	88900	5110000	0	6560000	11500000	0	0	2860000	0	0	2790000	1680000	2940000	2620000	0	120000
AYNTVIPSSGK	16500000	11800000	8630000	7410000	8890000	10500000	38800	9210000	5910000	6950000	6100000	NA	9290000	5870000	7500000	6130000	8360000	8090000	9070000	7780000	6920000	5940000	6280000	8670000	2690000	10600000	4450000	4690000	8740000	4780000	10100000	8490000	199000	4920000	8960000	9780000
AATIYGGSNEVQR	20900000	11300000	9130000	3650000	12600000	12200000	10400000	10900000	7380000	4440000	5520000	5220000	439000	7520000	5020000	847000	953000	NA	10600000	7730000	2890000	2880000	3230000	5270000	7280000	6930000	632000	2460000	958000	2360000	6500000	1020000	4270000	1550000	3340000	NA
EIVDLCLDR	1550000	12300000	7380000	4260000	26200000	38300000	NA	20300000	NA	46700000	47200000	NA	38100000	1350000	860000	31700000	2180000	10200000	36800000	NA	NA	50400000	20600000	19600000	39700000	17800000	6930000	17200000	27800000	4480000	14200000	6500000	9090000	38500000	2580000	6630000
NNGSSEGPTDDLR	3650000	503000	3630000	1200000	1190000	1660000	3450000	2480000	2770000	649000	2190000	312000	2300000	226000	915000	2390000	NA	1350000	2010000	1450000	3060000	1060000	315000	1820000	2100000	545000	1740000	3540000	1920000	2460000	1490000	1190000	1790000	3450000	884000	1430000
ESLNGLPCSDPSNYDDR	5550000	477000	305000	871000	68600	8550000	826000	1240000	7790000	1380000	4970000	110000	9320000	5590000	4940000	291000	8720000	15700000	649000	1280000	16500000	502000	6140000	2620000	925000	14800000	355000	576000	2070000	429000	1690000	4010000	197000	844000	1870000	607000
STELLIR	505000000	876000000	961000000	610000000	1060000000	702000000	877000000	1230000000	1020000000	647000000	814000000	420000000	813000000	664000000	2980000	1090000000	16500000	511000000	520000000	597000000	284000000	595000000	399000000	689000000	444000000	191000000	487000000	717000000	578000000	831000000	530000000	668000000	395000000	634000000	587000000	523000000
AGATYVSPFIGR	1350000	27000000	495000	3890000	42200000	978000	32800000	45300000	1470000	2110000	220000	951000	23700000	943000	318000	23500000	0	447000	1090000	140000	246000	6540000	5160000	9700000	14500000	650000	1430000	18500000	15400000	18400	12300000	1050000	16900000	11700000	9340000	4570000
NGVVLITTK	6460000	35100000	NA	2040000	NA	NA	5820000	NA	1710000	NA	14800000	10200000	2720000	777000	338000	19700000	0	1470000	NA	960000	385000	5100000	494000	8720000	NA	1610000	449000	NA	6160000	1250000	6130000	5230000	8540000	NA	5310000	1880000
YNIGLGGSTK	37400000	1870000	591000	22300000	26400000	622000	38000000	33800000	2250000	11200000	12400000	1840000	1550000	2410000	2280000	2210000	475000	1430000	NA	NA	2020000	17100000	13500000	22000000	27100000	1280000	17400000	1550000	NA	16300000	22800000	16600000	22200000	22000000	23000000	19000000
FPGVYSTR	38500	40900000	10300	0	118000	18200000	29900000	27900000	19900000	34800	160000	89800	26000000	0	0	21400000	0	15900000	25200000	11500000	17900000	40100	43300	23300000	18900000	15800000	55700	23000000	24100000	14100000	22500000	21400000	24400000	13100	107000	16500000
FGVTQPNIQR	46700000	1760000	19000000	26600000	20800000	27400000	8840000	22000000	33700000	27700000	27400000	912000	26100000	345000	1910000	22300000	NA	NA	41000000	20300000	19500000	24500000	16100000	24600000	21100000	21500000	19500000	18200000	27100000	NA	21700000	22500000	24100000	22300000	35400000	25400000
TLVTDIDPDAQVK	20400000	3240000	20700000	19300000	16900000	19800000	1160000	3340000	23900000	22600000	1690000	6300000	2980000	2680000	1530000	9130000	25700000	16600000	4150000	NA	NA	20800000	2990000	21200000	5540000	22000000	8710000	3640000	18900000	16000000	21200000	14400000	2210000	22100000	15800000	18000000
VIDLVCPFAK	537000	26000000	2040000	1070000	8280000	19800000	11100000	7550000	1280000	13000000	15400000	12100000	12100000	155000	440000	6160000	363000	271000	25600000	1790000	656000	17200000	10600000	22600000	20300000	0	778000	6290000	1090000	558000	16900000	244000	12300000	11800000	839000	669000
GVQTVLQR	16400000	10600000	3060000	7490000	7080000	8980000	11600000	9990000	2360000	5950000	4210000	1020000	1270000	513000	724000	3830000	NA	4110000	10800000	3340000	338000	5110000	5000000	13700000	11300000	1260000	2990000	474000	4750000	9730000	18600000	12300000	9120000	5980000	20200000	14100000
VVNTLGEPIDGK	1120000	9260000	1300000	619000	2410000	965000	6620000	851000	1360000	821000	3870000	2980000	2640000	2340000	205000	556000	469000	926000	7780000	1630000	2280000	3170000	47800	5350000	7600000	1170000	1400000	5250000	1080000	583000	3130000	4440000	2890000	220000	345000	2410000
IATGLGNDNGELDIFR	0	85500	3390000	49100	494000	0	12500000	10500000	0	92700	157000	9200000	7290000	0	0	2700000	0	0	274000	0	0	291000	19700	2210000	3830000	NA	0	115000	0	0	0	0	51300	335000	0	0
IDDLSVNWR	471000	260000	3220000	412000	5140000	117000	6900000	4030000	88900	3550000	7640000	172000	4280000	1510000	113000	472000	0	251000	2390000	35400	141000	1230000	1640000	1460000	3580000	0	63100	766000	3070000	153000	2780000	662000	667000	1560000	1150000	562000
ALVNSVTGEDEVLER	1140000	1350000	2240000	645000	3840000	6340000	6910000	6180000	3870000	3850000	353000	1240000	5710000	1980000	531000	1160000	4770000	2170000	1900000	1930000	5120000	2830000	354000	4860000	5610000	NA	1300000	2520000	966000	1880000	3500000	869000	3940000	2120000	183000	2190000
ETTENESANYGYK	0	1600000	2370000	0	8430000	1740000	5260000	4530000	5270000	98900	573000	2590000	6340000	2980000	2580000	3800000	1010000	126000	0	34600	217000	1520	0	0	1290000	145000	0	3070000	5390	0	0	17000	819000	0	0	237000
VLPVVISVYK	0	2450000	2230000	19900	2000000	0	3530000	1840000	0	103000	1850000	1570000	117000	227000	0	4780000	0	0	6790000	66900	0	1520000	1150000	NA	79500	0	0	134000	38100	0	56700	0	NA	5370000	167000	403000
TPPAAVQLLEAAK	212000	16400000	9760000	65900	20300000	0	27500000	950000	NA	22500000	18100000	18200000	1220000	16300000	321000	4650000	NA	0	NA	0	NA	2400000	19100000	2560000	29100000	0	NA	NA	0	NA	NA	154000	1200000	NA	3150000	2230000
LVVLPADIPAAVR	8430000	11400000	2260000	5680000	6130000	1620000	11500000	6400000	1500000	12000000	16000000	10500000	7980000	2470000	443000	6120000	642000	1080000	23000000	9020000	84900	13000000	2510000	14700000	16300000	203000	444000	5300000	6160000	4540000	25600000	12500000	11000000	8080000	3450000	8850000
GSYDFYK	627000	11400000	294000	807000	10600000	5690000	16500000	12600000	12100000	8930000	416000	22400000	22300000	14900000	0	30200000	3200000	31600000	20500000	23000000	1570000	514000	6740000	320000	244000	12800000	12500000	12900000	28900000	369000	88900	1100000	16800000	757000	24200000	163000
YLNDASTR	54300000	34800000	42700000	32800000	53700000	42800000	58800000	59700000	65400000	42900000	33200000	190000	364000	34000000	37500000	84300	369000	128000000	75400000	118000000	124000000	97700000	43100000	65900000	63800000	59300000	76000000	35700000	101000000	32100000	47400000	74500000	41100000	36200000	93500000	116000000
SAALSSCPQR	18100000	1290000	6300000	2910000	5670000	7270000	831000	4280000	2320000	4660000	2000000	NA	5430000	1080000	2980000	5690000	962000	12700000	1100000	NA	7590000	5090000	948000	14400000	1750000	NA	NA	5540000	15400000	3400000	8890000	9100000	5540000	7030000	23200000	12900000
VYTTTPK	239000000	187000000	82500000	151000000	118000000	179000000	121000000	137000000	94000000	140000000	150000000	6340000	124000000	84600000	78700000	146000000	185000000	211000000	242000000	132000000	139000000	160000000	137000000	127000000	180000000	118000000	178000000	95600000	193000000	154000000	170000000	145000000	4210000	117000000	338000000	192000000
LTVASIDANSVR	1070000	245000	176000	136000	231000	3230000	4570000	2560000	858000	1220000	681000	220000	3620000	48200	0	625000	840000	59500	6090000	134000	1360000	2030000	223000	32700	3690000	708000	100000	912000	912000	0	615000	2010000	4030000	330000	1070000	1300000
VPSGNGEPR	627000	1580000	1120000	NA	2620000	5270000	1600000	NA	4170000	1450000	3680000	1090000	4690000	1290000	3200000	891000	2170000	NA	923000	1020000	5790000	2170000	623000	3850000	1380000	NA	533000	1600000	593000	1620000	2430000	570000	2480000	690000	2080000	2250000
YTPEQLYSTK	7030000	9890000	7940000	2060000	7350000	0	10900000	11400000	6750000	1210000	4150000	1380000	7950000	5080000	77400	4920000	2380000	1390000	3690000	906000	664000	723000	1700000	2060000	4140000	1030000	335000	4360000	1930000	4710000	4270000	459000	95500	3070000	4470000	3710000
DVTLPIAIR	0	0	2730000	0	0	29300	6990000	172000	0	0	6840000	0	600000	4750000	6630000	8750000	0	9500000	18600000	5090000	0	7620000	4340000	8060000	323000	0	0	6900000	0	8710000	19200000	10800000	14900000	10500000	9670000	0
QAVTNPTK	60100000	31200000	16000000	33700000	22600000	37300000	14200000	19100000	19500000	23400000	26100000	20100000	19700000	11100000	10400000	14400000	23900000	37000000	35100000	20100000	20500000	17200000	13900000	13700000	23600000	11200000	14900000	12500000	26000000	15700000	15900000	25900000	15500000	23200000	27900000	19100000
IPIIQEEVEK	32600000	34100000	15000000	18700000	22800000	32900000	34600000	27200000	26800000	24800000	19200000	20000000	15800000	7850000	5650000	19300000	419000	18300000	20700000	12100000	8480000	11800000	5450000	6600000	11100000	7770000	6260000	10400000	18100000	5570000	12800000	13600000	12200000	10900000	21700000	14600000
DLAIIDPALEK	618000	4500000	682000	2130000	1000000	1850000	1610000	2110000	2840000	6080000	1660000	3350000	409000	3420000	3200000	1300000	216000	10000000	2960000	1850000	6440000	5910000	4000000	5490000	3670000	10300000	1070000	4080000	11200000	1920000	7760000	6210000	4940000	4100000	12000000	9810000
AATGETAFEK	16100000	189000	0	5580000	8120000	1090	7430000	8190000	278000	4120000	5130000	382000	83900	46400	0	3070000	37000	810000	1440000	4890000	87500	1650000	1970000	3830000	4270000	0	664000	161000	2920000	59800	6150000	3600000	4580000	907000	8590000	3450000
AGIVGLPNVGK	3700000	2350000	11200000	4010000	5240000	1750000	8360000	3470000	4150000	1200000	4880000	4910000	7790000	3830000	6600000	10200000	1170000	6800000	7360000	6660000	1470000	13000000	25100000	13800000	9540000	NA	3110000	1510000	12300000	NA	8340000	12700000	7280000	7340000	3490000	10100000
LDQFYDLINK	1720000	2710000	1260000	2300000	1290000	1490000	1820000	1830000	0	3320000	2010000	5570000	3160000	2440000	715000	4680000	20100	0	19000000	1910000	9220	NA	4580000	7930000	8180000	0	NA	7180000	4220000	3020000	14200000	1420000	8510000	5860000	4200000	6570000
TTEGSFDAPTNTK	4250000	762000	1040000	369000	2300000	2490000	2060000	1480000	2090000	259000	1310000	5000000	2570000	920000	58800	5900000	3080000	12500000	9470000	12700000	2120000	6860000	1050000	2570000	2060000	3000000	1700000	1620000	10000000	349000	550000	2890000	1220000	1020000	7360000	13200000
DVNASVATIK	69400000	75200000	80000000	38800000	139000000	94400000	118000000	122000000	174000000	101000000	72400000	91600000	137000000	106000000	103000000	85800000	66900000	78200000	60700000	95300000	106000000	79800000	68100000	71900000	78800000	55500000	57600000	47100000	101000000	65500000	71300000	83600000	55700000	41300000	71900000	59000000
CGINYQPPTVVPGGDLAK	33500000	76600000	243000	50200000	42600	91600000	79400	156000000	303000000	82300000	58200	121000000	0	135000000	133000000	64700000	59800000	86600000	0	83600000	90800000	122000	65900000	79500000	85100000	75800000	40200000	68000000	154000000	39000000	52100000	84300000	0	101000000	23200000	70300000
FADPGGPYADAGLTGR	75100	581000	1520000	60100	645000	309000	418000	996000	99700	102000	45700	59700	155000	0	0	0	73800	232000	76900	682000	225000	546000	72800	NA	327000	1100000	56700	26800	765000	2620000	822000	1960000	0	2900000	231000	106000
ILEVPVGPELLGR	0	396000	NA	0	1200000	0	269000	697000	0	3530000	3440000	558000	546000	541000	179000	453000	0	35900	2990000	15700	0	3510000	1920000	587000	513000	0	NA	381000	0	0	0	0	NA	NA	0	0
GTPVAGFGPLVER	67800000	83700000	1360000	11100	66500000	424000	191000	150000000	19300000	122000000	122000000	120000000	80400000	302000	77200000	58000000	91900	458000	0	111000000	36600	93400	46600000	138000000	137000000	0	23900	79400000	97700000	86000000	129000000	169000000	68900000	892000	61900	101000
VDDALAATR	2350000	2110000	967000	252000	349000	766000	2260000	104000	651000	105000	54900	485000	140000	712000	0	156000	1020000	1720000	483000	1340000	147000	1150000	123000	1950000	1190000	706000	193000	1380000	1580000	0	3320000	2270000	2610000	1690000	2230000	2560000
QNSQGNEWGR	4600000	0	0	4250000	1480000	75400	20500	48500	40200	853000	13200	60300	89000	45200	135000	29500	29200	55200	45800	619000	58100	8830000	8280000	6850000	121000	86100	7800000	23900	16400000	14000000	53100	NA	100000	5460000	19300000	7800000
YVDPGTGSNYSNIR	9800000	10700000	9510000	766000	3760000	2040000	6280000	4250000	1690000	744000	10300	0	1590000	0	0	25500	214000	61100	0	261000	24300	606000	52300	349000	32700	145000	2530000	14300	70800	609000	292000	1240000	0	1580000	461000	451000
TAGGLIIPDSAK	111000000	59900000	16200000	48100000	24500000	107000000	53400000	43100000	52300000	102000000	104000000	59700000	47200000	547000	229000	52000000	2580000	144000000	200000000	82400000	86000000	72400000	60400000	106000000	103000000	105000000	61800000	58300000	52600000	56300000	121000000	200000000	108000000	37700000	140000000	107000000
AVIDEEQPGIVLAGK	1800000	802000	1750000	1420000	587000	4340000	1280000	2830000	9650000	2750000	2990000	4070000	2280000	2800000	1650000	3840000	20600000	18500000	5160000	4480000	16800000	2220000	1200000	3170000	2230000	24700000	4210000	2060000	1420000	1270000	21600000	37600000	2110000	1060000	2750000	16000000
YQSIISR	934000	37000000	419000	1600000	297000	28900000	937000	569000	17400000	757000	728000	16000000	14900000	1590000	520000	4080000	20100000	33600000	381000	775000	3250000	542000	166000	660000	21500000	1710000	203000	15100000	979000	838000	1250000	432000	505000	1180000	567000	1310000
IVGEVLGK	NA	47000000	26600000	NA	17700000	38500000	47400000	39700000	102000000	15800000	28300000	34900000	25300000	11000000	NA	63500000	20400000	25800000	42900000	34700000	43200000	NA	29800000	NA	44500000	27500000	NA	33600000	74600000	21900000	45600000	31800000	53000000	21500000	30200000	41900000
DAIPNIVLNK	1150000	3150000	5360000	4590000	1780000	3260000	5280000	5570000	4810000	3170000	5180000	3710000	1080000	457000	802000	1090000	3680000	5260000	2020000	4760000	1940000	8050000	2880000	5450000	892000	1210000	5690000	4720000	8840000	4880000	8770000	NA	1660000	4840000	1930000	NA
GEAGDNAGILLR	40100000	86200000	29800000	69500000	40400000	46100000	41100000	41400000	32400000	26500000	35500000	45100000	26100000	1040000	24300000	58200000	594000	34300000	48400000	28600000	25700000	38700000	26600000	29200000	43700000	32800000	13200000	32800000	40500000	31600000	41300000	13500000	20000000	44200000	37300000	35300000
QSGGSGQFGEVK	5370000	2750000	490000	6930000	4640000	394000	4130000	3220000	576000	968000	613000	1400000	803000	1510000	556000	383000	170000	253000	NA	1970000	735000	1220000	3320000	2850000	486000	475000	1210000	1910000	1520000	2030000	4070000	3960000	3420000	95100	6690000	2820000
EYIPGVEK	945000	3210000	28400000	219000	24600000	59000000	34600000	27300000	56400000	69600000	75800000	1910000	1610000	1250000	502000	137000	75400000	86500000	110000000	46300000	39800000	54300000	0	80500000	108000	48100000	138000	32200000	48100000	43500	80400000	85000000	52800000	12900	55200	393000
SLIANDLDLAPTQVK	832000	1670000	544000	2020000	1700000	1300000	2060000	488000	1110000	1910000	1270000	4450000	2750000	1260000	833000	1570000	66500	2840000	2120000	2960000	871000	7560000	2950000	15800000	16700000	2610000	1750000	7310000	7020000	6870000	15600000	21200000	8370000	10500000	5100000	7760000
VGSVTVDPETR	2810000	28500	791000	1500000	1330000	5090	1360000	936000	92000	780000	44000	1050000	56100	1100000	0	102000	280000	525000	44400	507000	24300	683000	164000	497000	212000	118000	0	87100	211000	181000	125000	169000	0	453000	99200	230000
EAFENGTLTR	691000	221000	460000	107000	1200000	348000	1040000	974000	711000	414000	408000	1540000	249000	0	25800	5080000	441000	293000	2200000	2210000	445000	2260000	252000	119000	578000	350000	118000	1400000	4270000	132000	1670000	1070000	1130000	828000	2480000	6600000
AFDQIDNAPEER	48800000	34700000	4690000	24100000	15700000	32500000	14500000	10400000	7620000	23000000	20100000	14800000	9820000	4250000	0	15100000	33000000	31200000	49800000	23000000	18600000	12200000	13300000	11200000	22700000	27700000	8030000	4920000	8530000	9070000	29500000	27300000	23900000	2550000	39300000	22700000
DDNELGTTAVK	258000	3000000	2960000	4770000	11400000	591000	4300000	3970000	4070000	34900	664000	374000	3170000	4080000	2440000	9550000	6390000	91800	810000	255000	170000	51700	32700	128000	1050000	273000	118000	72700	125000	203000	1160000	358000	16400	289000	330000	33600
IDGLNIIK	1550000	619000	552000	1060000	1190000	0	5470000	1180000	6490	3750000	456000	656000	2540000	3610000	231000	3090000	0	29900	616000	2470000	0	3860000	436000	1610000	317000	0	2160000	884000	2620000	1090000	660000	1020000	130000	1250000	3880000	2880000
VVDALDPATEANIAAR	11600000	6010000	5090000	1560000	153000	30500000	28700000	18800000	21600000	17500000	16600000	26700000	761000	0	3630000	21800000	37300000	42100000	41700000	35900000	33000000	18500000	1550000	300000	7400000	9230000	2860000	561000	10600000	388000	3930000	14000000	2340000	1750000	6990000	14600000
GFAAANEAGAPFSR	12500000	4780000	1870000	450000	17000000	23900000	20900000	12800000	11300000	4390000	12200000	21000000	7940000	991000	3900000	16700000	393000	32000000	28100000	28000000	13200000	13800000	858000	5110000	4530000	1500000	488000	1160000	9650000	403000	904000	8900000	1650000	1380000	6010000	15000000
DYIAEGPQILR	16800000	2260000	14400000	8250000	93800	32400000	82400	179000	33200000	15900000	16100000	960000	1970000	1180000	197000	5320000	77500000	26100000	692000	222000	0	11600000	4610000	405000	224000	13600000	2890000	57500	17400000	28300000	19200000	12600000	9160000	5750000	11300000	6300000
ASNGVVIITTK	1520000	9010	10300000	134000	8240000	515000	8150000	7860000	147000	7980000	1030000	4470000	301000	431000	734000	6000000	52200	122000	14700000	4230000	12800	17600000	1720000	4840000	9810000	924000	17100	11300000	758000	107000	NA	NA	7840000	7390000	14800000	9020000
IFESPVTVER	9450000	5150000	10700000	3380000	10100000	12800000	694000	15800000	10200000	11900000	1820000	740000	1070000	486000	345000	10200000	14000000	13100000	4330000	NA	16200000	10100000	4110000	1010000	13100000	5760000	1580000	NA	6000000	5410000	12000000	19700000	9620000	9340000	9050000	8250000
GVDVNTNSLTFK	4350000	16700000	10100000	936000	7410000	1760000	16700000	14900000	5070000	9510000	6700000	5470000	11200000	6170000	5970000	8010000	2570000	4530000	15900000	NA	5430000	NA	3240000	12000000	NA	1780000	1910000	7210000	7640000	9070000	7470000	7520000	11300000	5930000	12700000	7150000
GFATFANTR	13300000	982000	280000	7740000	32500	9390000	23400000	671000	14100000	770000	10200000	9400000	562000	14800000	373000	449000	267000	13800000	23600000	6330000	13300000	388000	9270000	1010000	16600000	18700000	366000	260000	1080000	11700000	383000	205000	16300000	8360000	18500000	847000
TTPSVVAFAK	0	0	25500	0	29700	28600	527000	60100	31000	0	43400	326000	NA	44200	79300	93700	0	38300	829000	201000	0	381000	452000	664000	2610000	13700	5400	715000	1080000	0	6090000	9990000	3720000	262000	2730000	341000
ANYLAAAR	29900000	562000	1990000	2160000	1490000	4880000	19700000	17600000	1180000	26400000	21400000	3110000	718000	1270000	4730000	6490000	1800000	4300000	3130000	14000000	2450000	15700000	12100000	30900000	26200000	4630000	1860000	219000	15200000	14300000	NA	48100000	32600000	19300000	2800000	15000000
VLSVGDGIAR	116000000	1400000	103000000	306000000	243000000	325000000	328000000	268000000	354000000	291000000	452000000	233000000	364000000	59400000	2530000	241000000	270000000	450000000	492000000	264000000	211000000	275000000	46800000	431000000	338000000	395000000	266000000	119000000	183000000	144000000	401000000	300000000	4970000	67400000	374000000	426000000
VVDGLGNPLDGK	1960000	3640000	1300000	4180000	1090000	3600000	5000000	3440000	NA	2960000	3150000	575000	2440000	1030000	412000	NA	1100000	6850000	8690000	3080000	1530000	NA	2040000	NA	3460000	471000	1770000	3630000	2410000	4650000	NA	6960000	8780000	1510000	6890000	5050000
STVAQLVK	1680000	1910000	29500000	5880000	43900000	58600000	61700000	4040000	73100000	36500000	29200000	7220000	7170000	3120000	1300000	56200000	5840000	54100000	7020000	29300000	19700000	42800000	3180000	61900000	3570000	35200000	7960000	47200000	56900000	42400000	34100000	49000000	60300000	35500000	76900000	2830000
LELAQYR	115000000	183000000	168000000	108000000	223000000	134000000	238000000	7040000	261000000	207000000	150000000	4450000	1980000	4950000	2360000	2520000	19000000	131000000	129000000	152000000	109000000	195000000	146000000	119000000	169000000	101000000	128000000	225000000	180000000	235000000	141000000	139000000	154000000	260000000	142000000	159000000
LSYAVPSK	30400000	3340000	41500000	18400000	26700000	20300000	36100000	35500000	28100000	18800000	16000000	6470000	23700000	855000	20100000	15000000	17800000	23000000	25100000	19700000	17100000	16300000	13600000	23900000	14300000	15900000	7280000	8870000	15200000	14800000	17500000	8690000	13100000	12700000	23200000	15600000
TLSDYNIQK	96200000	79000000	112000000	73400000	99800000	85900000	164000000	159000000	179000000	87200000	89700000	103000000	110000000	89600000	86500000	100000000	267000	84600000	69700000	89100000	89300000	105000000	59700000	58800000	59200000	61600000	71400000	73100000	89500000	92400000	88400000	61500000	36300000	74700000	54000000	89100000
SEGVISLNEFR	13900000	74200000	61400000	983000	469000	741000	71300000	60200000	885000	528000	59800000	71700000	47500000	25300000	455000	64000000	96500	21200000	1030000	24400000	1020000	83100000	29800000	675000	66200000	1310000	716000	33900000	1000000	701000	53100000	1100000	48600000	63200000	33300000	46500000
EYNLALGER	13000000	374000	NA	13200000	11900000	8540000	25100000	15800000	1270000	18300000	15700000	17200000	633000	206000	111000	3190000	1200000	627000	13600000	5430000	1300000	20000000	14600000	22600000	22100000	3250000	1130000	32100000	NA	34900000	31100000	38600000	15200000	35900000	25800000	32100000
LFAAIEEQK	5480000	19800000	5270000	6770000	5040000	307000	29400000	17400000	1550000	NA	7620000	4310000	1100000	10800000	510000	12200000	780000	3380000	9870000	861000	400000	8910000	3300000	NA	16700000	2130000	843000	5860000	1240000	NA	12400000	5990000	11800000	3280000	4190000	4480000
LADQAQYISYGPAR	21400000	NA	10700000	8610000	12400000	20800000	24700000	8780000	24700000	7470000	4160000	8450000	11500000	1730000	1820000	4970000	15500000	10100000	10900000	12000000	2330000	11300000	11900000	7830000	21500000	16900000	3600000	5590000	3160000	10300000	18800000	20900000	10000000	8980000	2850000	14300000
LADQAQFISYGPAR	15800000	23600000	10900000	1770000	14100000	25500000	23500000	17300000	15400000	13200000	15300000	12800000	24600000	16800000	773000	3880000	405000	15200000	10800000	14700000	1190000	1640000	5170000	20500000	21600000	853000	186000	3420000	2350000	4380000	17700000	18000000	10400000	3250000	3840000	6530000
TADAGYLTR	63000000	1370000	18900000	45600000	513000	30300000	20200000	683000	24700000	36200000	30900000	28500000	186000	18000000	19000000	26100000	32900000	45100000	55800000	24200000	27700000	29600000	23900000	34900000	2140000	29100000	3170000	985000	32900000	790000	31500000	30700000	26700000	23100000	52100000	635000
VPIGQGQGNGLTSR	584000	1380000	1720000	183000	994000	311000	2530000	1760000	581000	439000	502000	215000	1010000	0	0	264000	138000	42900	0	116000	109000	202000	46100	203000	464000	27700	0	239000	181000	106000	85600	61200	0	329000	41300	130000
TTISGSSVTAK	11000000	39000	14900000	6230000	7650000	6410000	28700000	18300000	7220000	4750000	5810000	7230000	0	357000	723000	3230000	4640000	3060000	471000	1460000	2700000	1550000	26200	2240000	1130000	1980000	2060000	1900000	628000	675000	1780000	847000	228000	2970000	87300	475000
GESDPTPEEK	58100000	33300000	12800000	37500000	16800000	32400000	17600000	24600000	20500000	23100000	23500000	21800000	19800000	5020000	8960000	18700000	1090000	39100000	33200000	24300000	23100000	21000000	14900000	23400000	23500000	11100000	19400000	18100000	27000000	21500000	31700000	21900000	15400000	22700000	38500000	28100000
DLSFETPQGAAAFQK	6660000	750000	1740000	702000	1080000	861000	349000	704000	1930000	3620000	103000	523000	259000	102000	186000	1360000	5990000	1060000	115000	2220000	1510000	316000	1270000	3350000	993000	259000	766000	849000	1260000	340000	2970000	2720000	2060000	1070000	2070000	307000
VEGLSYSR	1590000	9720000	13100000	4410000	282000	9030000	9400000	1110000	12800000	2530000	1090000	3000000	1260000	862000	2470000	1040000	824000	8740000	3270000	9760000	1680000	6140000	9570000	7870000	2870000	2750000	6030000	1400000	17500000	2530000	8460000	3090000	6070000	9100000	17300000	11600000
VEVLSGPQSTLFGK	880000	4950000	276000	88500	744000	1140000	910000	359000	965000	2670000	1890000	2160000	985000	40800	1200000	1160000	283000	3960000	1140000	NA	1150000	4980000	2050000	641000	1150000	NA	1060000	1620000	2060000	641000	1060000	13800000	8010000	393000	899000	669000
VLSGNAPTAAQIK	96400000	125000000	122000000	72700000	95700000	64000000	96300000	89000000	106000000	51100000	41700000	34600000	23300	66500000	70300000	44500000	48300000	43100000	15200000	55100000	34500000	27000000	37600000	67100000	60700000	64100000	20700000	25200000	50800000	46300000	62100000	36200000	41200000	25700000	35700000	38700000
GYVDPNFSGR	57500000	103000000	80600000	78800000	64900000	13700000	61000000	57500000	46200000	28400000	26700000	27000000	48700000	51300000	61000000	48900000	153000	336000	13800000	26200000	12500000	9220000	24500000	42300000	18600000	NA	28900000	25100000	32700000	35800000	30200000	20800000	25500000	16400000	20800000	26800000
GIYPAVDPLDSTSR	80300000	3500	46300000	27400000	51800	110000000	74100000	53200000	84700000	51400000	72100	48500000	73700000	0	46400000	32800	92600000	73500000	230000	54900000	59200000	22400000	16800000	39100000	54500000	73700000	4580000	156000	15500000	27800000	58500	90600000	19300000	9160000	36500000	39400000
VLEVPVGPELEGR	119000000	943000	85600000	84300000	66000000	152000000	328000	1650000	92000000	101000000	415000	327000	1230000	232000	1370000	1920000	150000000	126000000	142000000	91100000	91000000	569000	52700000	1690000	104000000	129000000	36700000	34200000	75600000	40500000	107000000	87300000	65000000	42200000	85800000	82300000
VAPGVIER	158000000	84500000	43900000	67000000	36400000	66200000	44200000	61300000	46800000	2600000	63000000	13800000	52900000	36200000	26000000	26600000	48800000	73700000	99100000	42700000	37500000	30200000	40600000	53800000	25300000	45800000	31400000	15600000	41700000	19900000	44100000	50300000	32000000	21300000	60100000	88700000
FNDQLATR	30500000	32300000	13300000	29600000	10300000	12200000	9390000	12100000	7770000	7730000	7890000	4820000	8140000	5500000	7200000	11800000	12900000	13600000	22800000	5460000	9690000	13500000	12300000	13400000	10900000	7920000	8680000	441000	13500000	6280000	14500000	5630000	8440000	10200000	20300000	277000
WLENGAQPTDTAR	1420000	2410000	0	1190000	323000	767000	1210000	978000	0	136000	1210000	1840000	1350000	557000	1570000	6000000	10200000	0	6490000	4800000	0	4670000	2280000	1820000	1840000	49300	2710000	2350000	6710000	2700000	7100000	2550000	2460000	3100000	11000000	6450000
VQIENTSSDYDR	2390000	441000	1450000	609000	125000	1270000	179000	887000	1080000	219000	1740000	683000	1010000	330000	96200	2340000	13700000	747000	1040000	3460000	418000	1200000	108000	1060000	2120000	3850000	884000	1730000	3490000	12100000	14500000	2340000	1410000	1490000	3790000	4950000
VNALSAGPIK	12300000	656000	2840000	8780000	8170000	6260000	1010000	1600000	7810000	5400000	6090000	2060000	8670000	7050000	1480000	6510000	NA	7410000	8960000	11000000	5000000	8600000	5810000	9480000	745000	5960000	2750000	5020000	5970000	6410000	7560000	10700000	9130000	6000000	12600000	11100000
TLAASGIGDFR	14700000	24400000	3540000	14000000	14200000	4970000	30900000	26900000	13500000	15600000	16700000	18100000	17100000	14700000	1380000	21300000	3500000	2090000	20600000	17000000	1140000	15400000	13600000	26500000	26000000	1940000	NA	18500000	16200000	18400000	22200000	NA	20100000	9280000	12500000	23700000
EIVDLALDR	3060000	16700000	9910000	7950000	19000000	NA	13600000	15500000	12400000	9270000	483000	4970000	229000	71500	45700	13600000	51400	1590000	5660000	NA	3840000	5290000	1470000	6720000	3760000	1270000	125000	7140000	3970000	9640000	2970000	1430000	2100000	10300000	1140000	3080000
FGEYSPTR	151000000	120000000	48700000	120000000	73900000	108000000	88400000	73300000	84000000	102000000	108000000	86800000	93400000	75500000	62900000	1770000	120000000	113000000	181000000	77500000	90600000	90700000	81400000	117000000	85300000	90800000	55400000	8930000	57400000	72600000	108000000	119000000	961000	7240000	171000000	126000000
TLAGAAIGGAR	17500000	12100000	11500000	13600000	12100000	15500000	15100000	11100000	1770000	7150000	14700000	9070000	1660000	12800000	3370000	9300000	2840000	9400000	31300000	13000000	5240000	11700000	8770000	15500000	9990000	18000000	6530000	7180000	12600000	8760000	18700000	22800000	13300000	10300000	19300000	18300000
FVLIPSGK	184000000	135000000	154000000	59300000	159000000	173000000	236000000	150000000	3750000	148000000	117000000	81100000	72700000	524000	49400000	37500000	3730000	446000	35700000	28500000	401000	17100000	7170000	18000000	9130000	140000	4810000	7810000	6560000	11800000	7550000	725000	1900000	9580000	4300000	7860000
FTGSAPQGTPTEVR	25600000	13100000	11100000	3140000	19300000	15900000	20300000	19900000	17800000	11000000	7150000	8400000	10800000	4340000	3180000	2340000	4210000	3420000	26100	790000	946000	530000	0	201000	703000	417000	53000	0	171000	523000	260000	281000	0	397000	299000	190000
DNNVDQALR	138000000	67900000	28700000	140000000	40200000	146000000	48300000	33800000	39700000	102000000	92700000	80100000	60500000	36800000	34100000	84300000	197000000	216000000	230000000	112000000	156000000	114000000	78000000	113000000	61000000	92200000	167000000	41000000	153000000	95400000	137000000	94500000	64300000	43700000	258000000	172000000
TPGNYTIFQDINGR	15700000	0	75300000	18900000	44900000	0	83100000	70900000	32100	0	41900000	0	54500000	25200000	25000000	19900000	0	31700000	18600000	18100000	32700	28000	3720000	26800000	43900	0	95200	25500000	35300	0	27100000	0	5190000	33200000	2090000	7660000
SLATPTESGSFPR	209000000	268000000	216000000	113000000	109000000	168000000	198000000	196000000	156000000	171000000	213000000	142000000	153000000	88000000	12000000	63100000	145000000	102000000	84500000	77500000	117000000	77200000	39000000	114000000	79500000	154000000	87600000	102000000	58100000	118000000	113000000	52700000	40200000	125000000	31900000	40300000
TILYPSGEVATNPNILQR	33000000	398000	88000000	35500000	53300000	92400000	109000000	110000000	71200000	83800000	89900000	86500000	78600000	34600	0	23500000	96600000	43500000	444000	535000	70800000	37100000	6450000	63400000	56400000	393000	13600000	41500000	17900000	28700000	55000000	30000000	7580000	63500000	5210000	16500000
DLSPDNGFTDLTK	14300000	925000	12600000	9130000	6970000	12000000	17500000	20900000	10500000	14700000	11000000	1110000	8550000	7410000	5710000	943000	9500000	7190000	7240000	529000	8950000	7790000	624000	9320000	9620000	10800000	833000	1210000	5550000	9260000	10300000	5920000	308000	960000	4690000	6880000
SVFIIGPDK	1560000	3520000	850000	885000	3380000	356000	5260000	3550000	0	1910000	3440000	2050000	75200	2340000	0	1210000	0	0	5450000	501000	0	1180000	0	1520000	2860000	0	138000	1360000	187000	390000	1450000	2900000	1820000	970000	2270000	1140000
VLDALLPPAR	263000	296000	0	0	34900	0	0	131000	0	346000	385000	265000	29500	0	0	36700	0	0	1230000	0	0	15000	63600	0	251000	0	0	17800	0	0	216000	49000	65000	0	52400	0
VLDYVNFATDTQR	60200	548000	4110000	107000	48200	20400	7530000	7430000	429000	5500000	691000	4200000	0	0	0	0	0	66700	2740000	283000	130000	2050000	0	3300000	11800	5320	20700	85300	401000	281000	16800	2050000	22800	1740000	0	0
LADQAKYISYGPAR	19800000	NA	11600000	7920000	12900000	23900000	19600000	13600000	22100000	9420000	4810000	8040000	15700000	1920000	1930000	7110000	15400000	23900000	12700000	14300000	2260000	14900000	12300000	8810000	19400000	17000000	3600000	6440000	25900000	3720000	15900000	30200000	9210000	9010000	3040000	15100000
YISYGPAR	51500000	687000	29300000	22100000	33700000	835000	45000000	38100000	NA	51600000	46300000	1810000	476000	928000	891000	2470000	239000	183000	4110000	35800000	418000	24100000	21000000	47200000	37700000	20100000	11600000	NA	27100000	35700000	45200000	53100000	41100000	22600000	27500000	28700000
LEVGEGIEK	10200000	6990000	1870000	10200000	1620000	11600000	6160000	4860000	NA	11100000	9090000	4530000	2440000	3680000	4350000	8490000	NA	11900000	28400000	11500000	3260000	12600000	11000000	13900000	15900000	2150000	10400000	6880000	10600000	3140000	15100000	21600000	21100000	6060000	23300000	20900000
QAVTNPENTIFGVK	508000	NA	703000	4890000	5340000	371000	4880000	6100000	1220000	757000	8350000	859000	7220000	627000	153000	2350000	0	1090000	12100000	1970000	928000	998000	1230000	8380000	5340000	176000	726000	2880000	826000	584000	695000	667000	4920000	4570000	NA	564000
IEVFPASQLGK	5910000	19000000	16700000	5360000	14200000	4170000	14700000	14400000	NA	1140000	2900000	8890000	952000	1270000	11200000	6770000	775000	6780000	2800000	6060000	1860000	5650000	2890000	9760000	9530000	10500000	2280000	5970000	7810000	8150000	4750000	1640000	4770000	2120000	2630000	4680000
DGLFCER	11700000	79000	477000	15200000	361000	16600	8130000	351000	10100000	7120000	731000	7480000	523000	1940000	84100	564000	820000	20400000	4820000	9490000	NA	14100000	2230000	10500000	959000	400000	419000	913000	24300000	276000	3650000	8650000	801000	385000	1840000	19100000
LQVVEALR	5370000	11900000	4780000	9200000	6950000	10100000	5600000	6090000	NA	6520000	9510000	6390000	3630000	2550000	551000	1740000	325000	774000	5150000	715000	906000	4620000	1290000	1290000	1700000	NA	286000	2570000	1360000	1230000	1470000	901000	1420000	3100000	1700000	881000
FQQATGQLENPSR	1860000	602000	0	111000	141000	2860000	77300	156000	55700	1180000	3730000	1270000	346000	79700	48400	1040000	3800000	2330000	2440000	1550000	1570000	1040000	292000	1670000	3290000	2040000	0	1850000	96000	306000	4520000	3900000	632000	1090000	2910000	2240000
NAAVILNNNNEPIGTR	656000	185000	1770000	0	1720	1290000	1880000	1700000	1970000	852000	1210000	140000	247000	0	0	32000	168000	1310000	1000000	1480000	467000	1230000	513000	526000	1200000	197000	0	704000	954000	318000	55600	1420000	17800	56100	1190000	1090000
NQVFTTYQDNQK	4550000	4410000	2610000	135000	4180000	1070000	4090000	4290000	4150000	3140000	2760000	3220000	190000	40300	0	2230000	431000	470000	2910000	2530000	848000	2890000	1500000	1610000	2750000	494000	640000	2490000	2230000	2160000	2390000	3740000	2910000	1510000	2780000	2350000
LAELVSEK	29400000	4190000	16000000	24900000	13700000	25700000	20400000	23000000	20100000	21000000	14500000	1810000	2320000	2170000	2610000	13800000	20000000	28300000	166000	17500000	15900000	16800000	17500000	37700000	30900000	29300000	14900000	21900000	38700000	20300000	31600000	34100000	26500000	23400000	18900000	26400000
TIAAIEQNPK	2860000	6200000	3450000	3380000	8360000	7290000	6930000	9160000	6820000	6320000	9250000	11100000	8330000	3440000	2660000	16500000	3940000	NA	15600000	9810000	12500000	18400000	9190000	10200000	11300000	12400000	1310000	9810000	15200000	4970000	12700000	7810000	6330000	7130000	5290000	9440000
GGGVPCLVAVDK	200000	1520000	732000	1290000	1060000	167000	1900000	1330000	343000	1330000	861000	816000	740000	647000	0	1080000	585000	35600	3620000	1040000	34300	NA	4210000	2560000	6620000	210000	173000	577000	5680000	1200000	4750000	3390000	2190000	8180000	8020000	5420000
VFLENVIR	11800000	3220000	782000000	9530000	1680000000	830000000	1720000000	2140000000	15400000	534000	1190000000	4780000	25900000	1020000000	790000	668000	6880000	1100000000	13400000	16300000	4430000	1230000000	565000000	850000000	1070000000	9870000	5390000	855000000	15500000	7570000	19600000	13500000	11000000	1330000000	102000000	70500000
ELTITGITGSDK	1400000	3210000	2980000	113000	2810000	0	18900000	15100000	46000	2130000	481000	998000	29300	19900	12200000	3000000	0	NA	1890000	2340000	1280000	2020000	44600	618000	5440000	174000	0	1380000	347000	569000	1330000	1020000	2480000	453000	1280000	780000
VNDLQGVLR	0	0	736000	76900	1470000	103000	732000	1170000	48500	37400	273000	0	0	70500	204000	0	NA	59100	0	34400	0	59500	0	55000	43500	4250	0	913000	0	0	105000	195000	0	307000	0	16100
DLTFLADSAK	8410000	3410000	7950000	10200000	12200000	13500000	8600000	25900000	25100000	21500000	6060000	2630000	3630000	2660000	533000	2350000	25300000	8610000	1400000	10800000	1230000	9640000	4310000	16300000	4260000	916000	320000	NA	3960000	2900000	1200000	4030000	1600000	8870000	2570000	4670000
VDLSDDLVGR	18500000	2960000	4360000	16700000	23200000	14300000	14800000	21900000	NA	10200000	9090000	373000	6810000	1290000	1000000	12500000	1510000	5400000	5530000	2900000	2380000	10100000	3890000	9200000	1600000	NA	2250000	3940000	7670000	NA	10300000	9850000	6540000	5490000	13500000	8300000
NGLAVVPIER	NA	43900000	27200000	25600000	22600000	542000	649000	16200000	2430000	NA	34900000	23400000	1420000	12500000	3340000	19700000	1240000	339000	26500000	1740000	696000	15400000	7840000	7160000	NA	857000	1130000	1210000	1170000	298000	4810000	3080000	659000	6980000	1310000	4550000
VIVPSNPYDAK	33100000	589000	22500000	16100000	26000000	26600000	31000000	24800000	24100000	16700000	23600000	212000	31000000	412000	1800000	17500000	22900000	21800000	38600000	20700000	23800000	16100000	20300000	25100000	24200000	15600000	15600000	19200000	16800000	15300000	29900000	26900000	34800000	13300000	36100000	24800000
LAFFTGR	11600000	423000	2000000	11500000	3520000	1000000	8780000	7350000	708000	908000	380000	2890000	494000	455000	2370000	205000	231000	52600	1890000	542000	539000	4160000	9510000	1660000	4930000	329000	141000	11300000	687000	2670000	85800	372000	19300000	12500000	15400000	3270000
TAIVEGLAQR	6550000	1550000	854000	4740000	1130000	5900000	3890000	4010000	889000	1150000	5850000	3110000	7330000	1050000	1870000	3130000	812000	1720000	8200000	1350000	593000	5800000	3360000	5210000	5680000	3210000	1090000	5430000	2600000	2510000	7890000	16700000	5070000	375000	5910000	9110000
DAEVNQILNR	1660000	929000	2040000	2340000	3980000	7350000	5130000	5820000	6940000	2050000	2720000	328000	8230000	427000	1600000	5070000	5130000	6470000	12700000	NA	3710000	3240000	4730000	6900000	9620000	901000	1210000	5690000	673000	NA	971000	13000000	11900000	5070000	1200000	5480000
VQEGEDTPR	3750000	3020000	142000	508000	1230000	1380000	457000	2140000	248000	780000	1100000	4360000	420000	142000	6480000	288000	1090000	549000	809000	651000	2020000	5590000	1020000	497000	1560000	3670000	873000	80100	898000	1910000	6730000	NA	556000	NA	982000	622000
TLAETNANNGAYLTK	16800000	22800000	9540000	4860000	2930000	9100000	3850000	3470000	7750000	12400000	10700000	19000000	10500000	13000000	9910000	1960000	8420000	7220000	16200000	13900000	6600000	2070000	8940000	5480000	4140000	20500000	5410000	4500000	36900000	22700000	32000000	34100000	3680000	24100000	13100000	14000000
AYGTNYIETLR	0	2310000	141000	0	12600000	0	5450000	6960000	64000	2120000	27600	46600	9590000	8030000	0	2320000	0	0	0	0	36300	1170000	150000	982000	1920000	0	0	1200000	410000	0	1730000	192000	336000	2000000	0	65700
ELNISLDR	14600000	24300000	6190000	17900000	4530000	18200000	7890000	5290000	8180000	12600000	11000000	4200000	7240000	1620000	2610000	12200000	4080000	19100000	20700000	1930000	1120000	15200000	5140000	11700000	8180000	13400000	6800000	4960000	8090000	9900000	11600000	9460000	10100000	5600000	10500000	7480000
ADLGAIQNR	31000000	24300000	12500000	18800000	10700000	4270000	32400000	12400000	6830000	23600000	20300000	38300000	1760000	8310000	1680000	25600000	1990000	23500000	36200000	18400000	NA	23300000	7590000	8750000	10200000	NA	20400000	5620000	9350000	7370000	5710000	4790000	3990000	5980000	17200000	23900000
VVLETPVNLSSEQR	1020	NA	1000000	1060000	353000	1180000	270000	498000	613000	218000	182000	78900	191000	109000	115000	75500	1130000	1250000	165000	296000	73600	255000	75500	106000	266000	6730	55200	466000	445000	64800	571000	637000	43600	683000	52000	180000
IINEPTAAALAYGIDK	23700000	99200000	657000	34000000	58800000	111000000	133000000	123000000	23900000	88600000	85400000	90600000	4670000	55100000	33200000	55100000	558000	40100000	90800000	374000	101000000	83300000	23900000	61700000	96800000	9950000	210000	63000000	55000000	67700000	531000	74200000	39500000	66100000	19600000	50400000
FADLVQAR	10500000	7690000	1160000	5550000	1580000	702000	2970000	2340000	2470000	5080000	4820000	5390000	865000	1290000	387000	1060000	3080000	5960000	7640000	1600000	548000	636000	1360000	2450000	3370000	811000	1330000	2390000	837000	1710000	2190000	2340000	2530000	839000	4820000	3540000
VTDYLSEGQTVR	8380000	49900	10100000	8040000	7230000	6630000	5030000	6460000	9610000	2430000	1520000	32600	7630000	3040000	0	4750000	4120000	5400000	13000	1230000	3010000	2950000	2040000	NA	2180000	586000	167000	1590000	4280000	1070000	1490000	801000	724000	1480000	3170000	2730000
VLEIDNR	40700000	44000000	18100000	44600000	18900000	31900000	29300000	17300000	22000000	17700000	8060000	15100000	5120000	1030000	2220000	21300000	13700000	14100000	26800000	NA	12300000	15100000	23500000	15000000	21300000	21100000	11600000	18900000	10200000	8050000	24400000	13600000	19300000	9510000	39300000	25000000
GYLSPYFVTNADK	2800000	27100000	967000	71500	34400000	392000	48900000	207000	663000	124000	948000	122000	40700000	34900000	22800000	30100000	218000	875000	230000	26400000	184000	831000	12800000	23500000	44000000	288000	1660000	16300000	13400000	7230000	234000	81400	32600000	62800	19700000	235000
NQIEETSSDYDR	2050000	7450000	2170000	3460000	2790000	1840000	5450000	3250000	2850000	4530000	2760000	7430000	4670000	3090000	856000	13500000	106000000	5610000	11300000	5520000	8750000	6200000	1710000	3010000	10300000	16500000	7200000	6170000	3790000	43100000	64700000	24700000	1390000	4630000	15700000	6200000
LAGGVAVIR	357000000	369000000	190000000	496000000	251000000	224000000	273000000	240000000	334000000	273000000	27200000	266000000	382000000	312000000	307000000	243000000	4450000	353000000	452000000	119000000	36800000	377000000	244000000	399000000	356000000	42400000	351000000	295000000	335000000	300000000	276000000	557000000	10500000	248000000	458000000	333000000
VALTPDSVVQLQK	1290000	5530000	2160000	706000	1770000	2740000	NA	1700000	1170000	3070000	2300000	2340000	940000	2760000	2060000	1280000	3500000	NA	2610000	3960000	2700000	4280000	2080000	2710000	1130000	9940000	2130000	5550000	2660000	1570000	7700000	12000000	NA	2610000	7910000	5300000
EAVESLFDVK	94100	10100000	2180000	239000	4810000	0	7080000	6100000	0	14100000	13300000	14700000	797000	5900000	396000	12800000	34400	0	27400000	363000	0	19300000	10700000	NA	14600000	0	0	11800000	130000	334000	434000	169000	21500000	14900000	NA	12800000
AVNTTITK	504000	12500000	862000	2400000	1930000	11100000	1820000	270000	12400000	NA	535000	1530000	15500000	10800000	2240000	13700000	17400000	18100000	3280000	11300000	13500000	8420000	907000	6020000	14000000	7910000	972000	11000000	2400000	10700000	735000	10700000	1880000	1130000	33900000	1090000
VQFLNAYR	4270000	606000	774000	11000000	610000	1260000	6740000	1960000	259000	2580000	1860000	3210000	168000	1160000	879000	589000	0	1300000	3180000	1830000	1280000	15300000	4430000	8010000	2500000	26100	1830000	328000	1370000	1560000	8430000	3390000	748000	38100000	7890000	886000
GETQLTPEEK	25300000	19100000	5360000	20000000	10500000	9250000	11400000	12700000	12000000	10300000	11500000	18100000	12500000	8290000	8500000	13600000	18600000	14700000	19300000	12400000	8420000	14400000	8470000	16300000	15700000	11500000	14900000	9810000	18700000	16600000	20300000	16300000	9370000	10100000	24700000	26200000
TIAMDSTEGLVR	101000000	113000000	47700000	86100000	56300000	129000000	117000000	86500000	88400000	147000000	151000000	139000000	10500000	2980000	43600000	81900000	185000000	165000000	140000000	110000000	123000000	120000000	53800000	115000000	148000000	173000000	58300000	104000000	66200000	104000000	140000000	154000000	88800000	81900000	94900000	80800000
ATGYPLAFVAAK	1590000	786000	784000	1890000	1870000	410000	1030000	NA	0	965000	697000	1570000	968000	1370000	202000	1780000	0	0	247000	1430000	0	1890000	1970000	1050000	560000	0	0	2650000	450000	323000	628000	419000	31900	1670000	2700000	1230000
YLNDFGTR	5270000	641000	1490000	1920000	4770000	194000	11500000	251000	0	9140000	NA	7430000	476000	189000	322000	2050000	678000	NA	3410000	13300000	NA	18600000	7340000	18200000	795000	375000	10100000	1350000	17400000	28800000	39100000	40300000	1780000	388000	2890000	24800000
VNFLSER	1180000	1070000	188000	640000	943000	120000	680000	1020000	NA	996000	753000	884000	1030000	1180000	109000	315000	0	768000	328000	1930000	122000	3590000	5710000	7170000	461000	2440000	504000	287000	7740000	8700000	NA	294000	223000	733000	10700000	10400000
VSYDVQPTR	28200000	13300000	2700000	3740000	9110000	3220000	16600000	12200000	9190000	14300000	21200000	10200000	16400000	6990000	5590000	9060000	26900000	27500000	40400000	23300000	14300000	6680000	15300000	22200000	23700000	18600000	3940000	11200000	7310000	9230000	29300000	44800000	26700000	5400000	45800000	21300000
VETDGSLTPDDAVAYAAR	722000	117000	197000	158000	601000	1540000	83400	175000	294000	1300000	257000	242000	57100	0	64200	45900	718000	132000	78100	937000	511000	2020000	624000	3610000	143000	422000	50800	590000	1390000	846000	6500000	5640000	2800	1390000	3840000	3740000
IPSAVGYQPTLATDLGALQER	39200	0	0	1050000	43400	80300	43400000	29500000	160000	0	0	0	31100000	0	0	22000000	67600	54900	73000	0	126000	19100000	0	20600000	136000	68800	367000	56900	117000	5490000	169000	121000	6720000	7270000	36200	4880000
IDPTDSTCSK	38800000	25600000	22000000	20200000	24700000	30800000	30600000	24100000	32400000	20000000	34100000	52300000	29000000	15200000	10600000	25200000	24500000	20800000	22600000	25700000	33600000	38300000	7510000	13000000	8460000	3740000	27900000	5600000	32700000	3300000	6980000	16200000	7540000	3930000	12100000	18900000
SVQAVQPEGNYAIIK	1700000	6490000	5470000	2850000	3350000	4980000	14300000	10800000	5090000	3560000	4150000	4530000	3700000	4240000	617000	678000	2420000	1940000	3000000	2130000	2520000	1610000	1060000	2410000	1790000	1010000	387000	692000	750000	797000	1640000	414000	326000	1730000	930000	1030000
GTQTVSVWK	114000000	153000000	57700000	96400000	429000	74700000	135000000	57400000	101000000	1520000	125000000	7880000	74800000	61800000	3370000	6140000	2670000	85300000	11600000	67100000	96200000	76100000	82700000	5670000	96800000	191000000	78500000	164000	165000000	107000000	3850000	154000000	80300000	2870000	86100000	84700000
DEANAAAEQAR	2960000	5220000	194000	5950000	419000	2320000	2150000	1150000	1450000	1620000	1230000	1530000	19300	0	638000	1860000	11300000	2730000	1560000	847000	2460000	1620000	0	2500000	2570000	1550000	1170000	213000	445000	6240000	4740000	2420000	1640000	435000	4670000	3320000
INPGQLSQGTPEGTQK	1260000	1440000	660000	61400	1270000	1500000	1380000	2340000	2850000	1460000	887000	1750000	1390000	0	51000	139000	1130000	804000	109000	1190000	618000	556000	54200	308000	899000	114000	686000	199000	781000	431000	904000	1130000	71400	639000	303000	43300
ADLGALTNR	9910000	11700000	6840000	218000	8530000	13900000	16800000	7750000	2770000	13700000	10900000	20800000	12300000	10400000	574000	13700000	3260000	2140000	17100000	15200000	NA	15700000	4240000	8040000	11700000	12100000	11000000	4310000	6570000	4970000	8100000	9970000	8290000	3870000	12800000	13700000
SQILDTDFAK	2660000	5580000	2720000	349000	2190000	3430000	4300000	4500000	1160000	1910000	NA	3440000	2940000	2790000	2270000	6070000	1380000	794000	2800000	4970000	1050000	3250000	3610000	8930000	4000000	1420000	1990000	2120000	2270000	3870000	6150000	2430000	3260000	2070000	2670000	9780000
DTITPATTGETR	1300000	1610000	274000	448000	286000	41200	741000	1060000	28100	357000	12.9	18400	0	0	0	366000	0	79700	1030000	245000	31700	1050000	1120000	1790000	2930000	0	179000	0	1710000	0	2730000	4790000	1300000	573000	4800000	2260000
DYGGLLDNR	15700000	17300000	7090000	12500000	14000000	7970000	12700000	12700000	12200000	5000000	9230000	9790000	489000	2890000	496000	14500000	35600	12300000	17800000	11100000	859000	15700000	11100000	8790000	11100000	6990000	3400000	9160000	12100000	5800000	NA	10600000	8020000	10600000	NA	13400000
INVYFNEATGGR	1290000	88000000	36500000	3840000	55600000	83000000	79500000	57100000	41700000	57200000	88100000	128000000	68700000	43700000	1920000	21700000	2570000	22100000	56300000	22200000	70700000	42700000	285000	30500000	37200000	47600000	889000	3840000	8240000	14300000	34700000	28100000	10400000	39100000	1020000	3750000
LQASLGGIR	4640000	49200000	4120000	88300000	1610000	57900000	99300000	82900000	23500000	66400000	886000	55600000	58200000	39800000	44200000	85000000	732000	107000000	120000000	60400000	37900000	74000000	76300000	2110000	95400000	86300000	51800000	67900000	72900000	1000000	91100000	98500000	95500000	1760000	121000000	89100000
INSAADDAAGLAISQR	6830000	9370000	2220000	0	211000	21900000	1800000	408000	2620000	5470000	NA	23600000	19900000	0	0	8020000	NA	1370000	51500	12500000	10700000	9610000	457000	15800	548000	1280000	311000	172000	944000	0	1730000	4360000	3940	31700	3950000	1400000
ALAEEIDR	61200000	94100000	23000000	50900000	67800000	88200000	140000000	86000000	88100000	40700000	38800000	24500000	11100000	67200000	40000000	12500000	121000000	123000000	76800000	86900000	78900000	109000000	50900000	37600000	53600000	47100000	29900000	22400000	31500000	22100000	44600000	28400000	50700000	24600000	85600000	82200000
QFYTGDAGYGLAK	426000	1960000	3040000	412000	3190000	340000	3620000	3400000	501000	987000	798000	2240000	3040000	7390000	2780000	7870000	2300000	1580000	1410000	NA	3980000	4030000	2090000	3970000	2330000	841000	457000	1730000	2590000	779000	1670000	1660000	900000	497000	3770000	5670000
TFVVPPSLR	4720000	5050000	NA	298000	6330000	1060000	8110000	5740000	1520000	5640000	NA	313000	5680000	7970000	1510000	18200000	0	2650000	15000000	2170000	171000	NA	2590000	NA	1940000	197000	834000	2810000	154000	3270000	NA	1530000	3590000	4460000	2380000	163000
DTNVLAEQQGVR	233000	1110000	218000	0	3560000	305000	1500000	1970000	244000	142000	164000	459000	0	259000	0	2850000	262000	2610000	14900	3340000	478000	1770000	387000	980000	826000	50100	434000	129000	2400000	0	1200000	502000	670000	121000	7750000	5800000
AIQTGQVPIGER	20200000	16300000	20000000	10000000	7250000	11600000	34600000	23200000	14300000	22500000	21800000	20500000	18400000	11500000	11100000	10400000	8520000	9330000	12500000	5250000	948000	8390000	4670000	13600000	11600000	4060000	5670000	6740000	4820000	6530000	14100000	9710000	4030000	6670000	4630000	8550000
VNAWLPR	3440000	879000	NA	4310000	681000	175000	2200000	403000	0	4300000	3430000	1030000	634000	353000	353000	477000	0	0	1910000	3340000	0	1120000	1840000	NA	265000	0	449000	291000	NA	9150000	403000	401000	133000	NA	2910000	5370000
NVSDLYLYPNTVR	158000	721000	396000	788000	1400000	368000	2850000	2290000	500000	145000	2530000	1370000	624000	1060000	1820000	156000	282000	751000	1720000	1330000	484000	511000	306000	574000	2120000	331000	304000	738000	691000	355000	339000	285000	227000	675000	282000	742000
EIGPTYYFAPPR	0	3740000	1550000	62300	751000	26000	1290000	4700000	0	657000	845000	1090000	630000	3160000	2280000	0	0	0	4410000	50200	0	143000	142000	2640000	780000	0	0	0	102000	43100	41600	432000	128000	430000	240000	0
ILEIYGPESSGK	12700000	10200000	6540000	6550000	9840000	11200000	13200000	11800000	11800000	11700000	18700000	9170000	14900000	10000000	353000	10200000	6160000	1160000	24800000	NA	11700000	5800000	5080000	12900000	15000000	NA	3230000	6760000	4630000	1820000	12700000	27400000	13400000	5640000	15100000	9430000
GFQEVLSGR	11600000	105000	9550000	404000	523000	NA	1090000	289000	394000	8510000	516000	183000	857000	1690000	5580000	1100000	0	523000	203000	6470000	297000	4750000	635000	302000	1260000	60600	1460000	1550000	2720000	5140000	8130000	8950000	16000	2290000	NA	NA
LNNPTNDVLEQR	2000000	2820000	NA	287000	1470000	1340000	2360000	2810000	1500000	355000	454000	NA	4950000	1830000	1700000	3470000	NA	4600000	1820000	4700000	794000	2700000	222000	2490000	4050000	3280000	719000	30300	NA	1980000	5990000	NA	2700000	2030000	5730000	NA
VVDGLGQPIDGK	30700000	1050000	28300000	26700000	765000	28500000	1080000	1640000	25800000	29300000	NA	649000	21400000	1590000	540000	16500000	27400000	28100000	22500000	23600000	18100000	20200000	16200000	7580000	24200000	26100000	14000000	3780000	18900000	23800000	24400000	20900000	14500000	1910000	33300000	30700000
VVDSLIPIGR	17200000	14300000	23300000	8030000	22300000	343000	37500000	28100000	485000	32100000	31100000	410000	18700000	14600000	11800000	3100000	1540000	911000	7060000	6720000	2170000	6910000	475000	3050000	3660000	178000	134000	1470000	1390000	2040000	5490000	1620000	1460000	2220000	722000	3420000
SIQNLEASAR	3280000	66700	567000	792000	312000	1010000	1090000	1500000	131000	909000	5420000	4000000	52600	349000	397000	9290000	1200000	1730000	15900000	7890000	2110000	8360000	3210000	4280000	7170000	NA	NA	6260000	11600000	5730000	1610000	14800000	10100000	5910000	21800000	19800000
GYLSPYFVTDSEK	225000	3380000	NA	566000	3460000	412000	9270000	5640000	715000	396000	3320000	1850000	1630000	2660000	2530000	140000	14900	107000	10200000	NA	301000	3260000	313000	2810000	8120000	0	148000	519000	2670000	36700	1330000	7090000	5630000	375000	2300000	152000
NLASLGIYPAVDPLDSTSR	32300	0	19900000	1120000	20200000	5160000	34700000	23100000	313000	41200000	35100000	0	26400000	0	4060000	9130000	0	0	11100	9130000	1140000	13600000	38600	17500000	34500000	0	0	15700000	961000	4150000	24200000	4540000	4120000	23100000	0	3190000
IFVSTVEQAIR	2310000	NA	611000	567000	4260000	4560000	NA	1140000	0	16700000	23100000	NA	2730000	805000	2860000	9050000	0	1590000	46100000	1920000	851000	22800000	4370000	NA	NA	0	2300000	NA	17000000	617000	46200000	NA	NA	NA	708000	1580000
VLNSGGLDSDGR	198000	301000	244000	624000	112000	441000	226000	323000	303000	697000	541000	379000	347000	12700	921000	431000	189000	59200	386000	7320	393000	526000	311000	615000	1020000	230	793000	1900000	397000	1930000	653000	549000	1530000	1550000	1370000	1000000
LQSGDDLAPGVLK	6680000	4920000	3390000	7420000	1460000	NA	2550000	880000	2670000	4380000	8280000	3010000	7020000	577000	1140000	NA	799000	4100000	NA	1740000	1880000	2360000	7080000	1590000	7730000	1340000	2920000	831000	8580000	965000	6400000	5140000	3600000	2290000	919000	6180000
INAENTGQFER	5810000	1450000	1830000	5020000	6130000	1250000	4550000	5980000	1040000	3600000	3000000	7840000	2000000	263000	5660000	5200000	2220000	168000	7750000	4820000	2040000	4760000	NA	6580000	4940000	931000	1660000	3050000	3090000	1950000	4590000	6910000	5160000	3660000	8540000	7280000
IGDWTAVR	68200000	30300000	21500000	21700000	8830000	NA	34700000	1030000	28700	32500000	1320000	1280000	140000	88000	305000	309000	659000	5660000	245000	17300000	83300	19900000	12900000	29200000	1760000	840000	3360000	409000	9950000	2580000	17800000	18100000	10800000	NA	9890000	16600000
LDAAGVGPTAGSR	431000000	244000000	272000000	151000000	265000000	268000000	293000000	287000000	226000000	121000000	131000000	117000000	222000000	9340000	10300000	115000000	225000000	224000000	188000000	130000000	153000000	86200000	73800000	115000000	139000000	143000000	82000000	33500000	93900000	42500000	74400000	82200000	71100000	42900000	126000000	105000000
DQPSALAGTWR	19900000	31500000	59100000	7300000	36200000	1200000	48600000	39400000	901000	12400000	8820000	9510000	794000	25600000	21400000	41700000	1470000	3100000	16900000	15100000	2000000	8000000	7050000	10500000	10400000	6260000	2230000	4070000	13800000	3290000	7080000	5960000	6920000	3900000	10100000	8620000
LDAAGVGPSAGSR	149000000	103000000	106000000	57200000	121000000	87100000	113000000	116000000	87600000	52900000	43400000	48900000	88400000	56700000	59500000	52000000	67400000	77100000	77600000	48100000	54700000	39000000	27100000	41900000	44300000	49900000	33900000	13800000	42100000	17000000	31200000	33800000	29300000	17200000	52500000	42400000
AGENVGVLLR	234000	113000000	56800000	106000000	773000	111000000	51500000	44700000	29300000	57000000	98400000	79400000	51500000	34100000	0	67800000	206000	45000	222000	47500000	32500000	485000	50200000	298000	80400000	130000	133000	62300000	98900000	50400000	122000000	174000	51000000	106000000	40800000	546000
VDNIGTVLQVGDGIAR	0	0	1170000	55900	1360000	2130000	6910000	3750000	0	168000	2790000	1730000	20400	233000	0	64600	0	4630000	5070000	598000	0	4590000	0	1710000	4420000	0	0	10700000	74700	8780000	858000	193000	27400	320000	0	46000
AGLDGLNDNQK	7300000	388000	546000	1600000	2300000	280000	5350000	4100000	249000	2230000	3050000	3530000	382000	468000	58100	685000	190000	9180000	15800000	2180000	2910000	2060000	6740000	6670000	7030000	271000	1570000	4660000	1330000	3440000	7480000	11100000	10600000	1310000	10400000	6960000
IVVPFTDGVK	1750000	4440000	3200000	2660000	2890000	NA	2750000	5440000	1430000	1150000	870000	4180000	2090000	889000	3450000	NA	0	1270000	NA	795000	605000	4350000	2320000	4600000	5430000	8230	1290000	1160000	3920000	732000	4420000	1560000	4880000	3480000	4690000	5490000
AQQGLYEYDAVSR	6260000	0	3290000	769000	5890000	0	5800000	5210000	0	568000	4200000	3180000	1310000	0	0	3340000	24900	2940	7410000	1040000	0	4580000	1590000	4630000	4230000	0	78200	3810000	2900000	790000	178000	5410000	4240000	3450000	3310000	3610000
ELPDAFLR	98600	5900000	2440000	1160000	1370000	0	5260000	4320000	0	875000	1080000	2790000	612000	1890000	39300	10200000	0	0	3670000	776000	0	3930000	1240000	1500000	2200000	0	0	3110000	1170000	1060000	1440000	371000	896000	2550000	1150000	3180000
DIAAKGIYPAVDPLDSTSR	0	43100	6010000	0	1020000	0	1700000	315000	0	11700000	228000	31600	75200	0	97500	0	0	0	203000	2300000	0	3330000	0	279000	581000	0	0	308000	0	797000	NA	867000	53700	602000	63200	736000
VTSQFGINGR	31700000	306000	10900000	16900000	17000000	NA	21200000	23700000	240000	14800000	22200000	1530000	657000	50300	123000	16300000	621000	199000	20300000	11100000	NA	17300000	6130000	19400000	18700000	60000	0	17200000	NA	11800000	301000	1880000	15800000	20000000	20100000	9330000
VLGSAVNPVLR	61900000	858000	14300000	19000000	22700000	53900000	27800000	22500000	31500000	51600000	48700000	144000	20000000	1370000	347000	25500000	30500000	29500000	35100000	28400000	32100000	17400000	11000000	22800000	17100000	27400000	12500000	17300000	13400000	20900000	37000000	41100000	6130000	22900000	7100000	20400000
EIVDLVLDR	861000	72800	9460000	14300000	50900000	267000	205000	37800000	1970000	83400	46200	65800	38600000	41600	139000	88100000	527000	49200000	4240000	17100000	248000	82900	3710000	16500000	27000000	171000	2220000	25300000	126000	33800000	26400000	316000	15100000	26500000	458000	7880000
LPIQDVYK	8570000	18800000	21200000	6870000	35900000	NA	24900000	26100000	NA	15900000	8210000	14400000	36500000	37000000	5050000	21000000	1260000	NA	10800000	NA	1540000	14400000	8430000	7320000	5680000	508000	6070000	13900000	10100000	4960000	7060000	7460000	9360000	13000000	12100000	8080000
ISGIGTVPVGK	22900000	1130000	18900000	18100000	359000	19500000	1650000	3710000	1500000	NA	536000	205000	22500000	1880000	1760000	1600000	NA	39900000	2490000	NA	19200000	20000000	26500000	NA	NA	50400000	23700000	591000	46900000	62400000	23500000	30300000	NA	3470000	31600000	33300000
FQELLEK	5320000	12000000	8450000	11800000	5000000	NA	4610000	7110000	12800000	6020000	5790000	5480000	572000	4410000	70700	3030000	1310000	491000	7780000	9470000	517000	NA	874000	15000000	11100000	NA	7470000	16700000	7770000	25600000	19700000	11300000	7070000	17800000	9600000	11800000
EANPSFLK	3800000	1720000	910000	8420000	5770000	1610000	6090000	6020000	1880000	4970000	1710000	4100000	1410000	726000	247000	3140000	6660000	46100	3110000	8820000	221000	NA	1820000	11500000	14400000	32700	6980000	2050000	9330000	22200000	15500000	6650000	8760000	13900000	7880000	8390000
TGDACLIR	130000	7270000	4360000	9670000	3130000	2060000	4660000	2810000	5310000	0	447000	112000	338000	186000	5570000	232000	111000	12400000	4790000	7710000	5100000	36200	13800000	20700000	15100000	18000000	628000	44500	21000000	124000	350000	12200000	8640000	36100	438000	431000
AGSSFGEFEAR	932000	549000	3240000	4680000	1190000	1040000	2700000	1960000	2110000	1270000	905000	101000	123000	964000	1780000	2510000	5240000	583000	3330000	1700000	661000	2690000	2400000	6490000	1170000	733000	729000	1320000	4340000	17500000	213000	2340000	3250000	15400000	2880000	4390000
GSELTQSQIDR	6980000	147000	5300000	2980000	3670000	1930000	5950000	13100000	12200000	6900000	3100000	5600000	5310000	64600	344000	4170000	279000	8290000	1140000	8160000	2300000	3490000	9630000	9620000	12200000	8640000	6060000	9550000	27300000	19200000	13800000	11800000	20500000	12700000	8710000	7300000
AALDAASAK	20700000	14300000	6570000	9410000	5220000	8800000	10300000	9130000	10900000	12000000	8860000	442000	472000	12000000	12500000	802000	4060000	11600000	2600000	14900000	8010000	7860000	8480000	31800000	27900000	17000000	7840000	79300	27200000	35900000	33000000	29000000	24400000	17900000	16300000	13500000
IILLSEGR	767000	860000	1640000	4480000	316000	844000	259000	1250000	8020000	619000	1300000	5900000	1370000	1080000	308000	1210000	1440000	19100000	642000	274000	23200000	2380000	1050000	27700000	552000	8290000	1280000	28500000	1020000	1560000	27800000	31700000	30100000	1990000	33500000	26400000
DNGGIEGVTYPLLADSNR	43100	0	3190000	174000	1820000	3070000	4560000	4850000	2970000	778000	0	0	79300	0	0	0	5230000	2850000	0	1460000	1630000	1300000	166000	2710000	5960000	0	0	178000	1110000	0	3700000	4560000	1260000	494000	5200	539000
VAWSPTGINVPDYPK	2610000	17600000	15100000	7590000	11200000	13000000	28600000	16400000	8970000	12900000	15500000	740000	205000	47600	858000	7580000	1090000	7130000	7180000	12000000	10400000	8360000	4440000	20100000	17700000	16900000	1200000	6540000	16900000	7880000	25000000	14500000	4780000	10300000	940000	5570000
GPQGILFGK	14000000	4710000	2830000	15900000	67000000	9490000	99300000	85700000	158000	1320000	53200000	1100000	2210000	46300000	47100000	65900000	5620000	14100000	77200000	6490000	17600000	74700000	34500000	822000	56200000	2090000	26800000	31700000	1010000	10100000	1390000	698000	41700000	33100000	73900000	1430000
TTTTVGLGDGLNR	9110000	218000	5050000	6620000	7240000	1030000	1920000	388000	1790000	10800000	11600000	1320000	13600000	24800	21500	751000	444000	14700000	NA	14800000	13500000	11800000	12300000	457000	13700000	16000000	5960000	6910000	10800000	4680000	17700000	16600000	2280000	7700000	16900000	12400000
GESPEGLLSK	1770000	1290000	3450000	1290000	4820000	3430000	5840000	4640000	843000	3560000	7760000	5430000	976000	1450000	621000	23900000	552000	2380000	10100000	931000	1250000	3940000	4100000	2640000	10300000	1320000	1260000	11900000	4820000	3900000	3090000	2530000	6150000	2420000	7490000	4300000
LTGTSPGVLNGGSLR	23200000	59500000	35600000	30400000	26200000	18200000	31600000	35300000	26500000	10700000	17300000	14300000	17000000	21100000	21600000	17200000	20900000	17700000	12100000	17400000	12500000	17500000	18600000	20900000	23700000	0	3970000	17400000	21300000	15000000	16100000	5030000	22600000	19100000	29200000	16400000
ILVLGGGPNR	11800000	8650000	1550000	2420000	79700	4000000	1770000	3900000	138000	1910000	4790000	4210000	4160000	2680000	55000	3490000	29700	1560000	8600000	782000	1000000	516000	1730000	5220000	3150000	875000	642000	502000	2240000	118000	3960000	3970000	556000	1020000	3550000	4950000
STDLLIR	117000000	145000000	133000000	4230000	222000000	58700000	209000000	258000000	133000000	101000000	193000000	129000000	195000000	236000000	230000000	159000000	2620000	86000000	4050000	4480000	1300000	71600000	3740000	1180000	54600000	1510000	86200000	147000000	5470000	126000000	133000	724000	23500000	162000000	70900000	6280000
TVFVDLEPTVVDEVR	285000	583000	990000	1810000	2050000	1210000	11100000	14100000	152000	11100000	8790000	10900000	7440000	1580000	1200000	722000	581000	846000	8480000	45700	1860000	1840000	344000	5230000	12000000	0	333000	1500000	343000	523000	11700000	1820000	413000	32600000	188000	47100
GPGQNEIYIR	2190000	24600000	18500000	15700000	32700000	46000000	45200000	47500000	40400000	1340000	35100000	40800000	61600000	21500000	19800000	41700000	43800000	45000000	59300000	33900000	17800000	44800000	580000	37700000	38900000	28500000	1670000	1760000	44800000	8410000	26300000	36000000	19200000	25900000	34900000	32400000
ADVYDVLATDEGQAR	5080000	11000000	2860000	975000	2630000	6690000	12700000	7780000	7550000	1420000	4920000	9200000	8680000	6950000	154000	971000	5220000	4450000	1750000	11800000	5150000	1380000	2280000	18200000	17000000	17600000	200000	8010000	8230000	13100000	21400000	NA	20300000	2910000	5730000	9500000
QIAENAGVDGSVVAGK	1350000	458000	121000	293000	703000	307000	2660000	1090000	370000	3200000	312000	564000	381000	93000	4700000	155000	816000	687000	4440000	1510000	2350000	2070000	93500	1520000	222000	701000	402000	1470000	95400	341000	1010000	128000	542000	1710000	1210000	1850000
VVDTLGNPIDGK	30900000	25900000	11500000	16100000	11500000	27600000	23200000	22200000	18800000	18700000	18700000	13300000	16500000	7040000	535000	9880000	20200000	19900000	20400000	12100000	11000000	10800000	8610000	9260000	14200000	11400000	4650000	7850000	9340000	7500000	12300000	7960000	12000000	8740000	17100000	14900000
STVALDTILNQK	0	2540000	1910000	0	NA	0	531000	5480000	0	20600000	29100000	NA	1720000	744000	125000	8250000	0	0	NA	468000	0	NA	0	858000	1210000	0	0	1230000	139000	0	3000000	206000	695000	NA	0	52700
AVLGSQGVTSNTILSPER	38100	483000	1100000	299000	1430000	721000	1960000	3390000	791000	111000	458000	52300	17400	32100	0	34200	1090000	947000	234000	1060000	75300	676000	120000	754000	2350000	882000	2580000	1020000	1190000	279000	1460000	939000	493000	369000	1590000	0
NEGGANFR	NA	793000	777000	NA	NA	3180000	913000	NA	4740000	14700000	783000	435000	16100000	4950000	1050000	NA	285000	1800000	82800	31700000	765000	NA	45400000	18600000	865000	1710000	24300000	2620000	27200000	24400000	38400000	12900000	971000	26200000	57300000	NA
LIVADEISPDSCR	873000	180000	1710000	4110000	797000	1380000	1810000	649000	1520000	40300	310000	682000	866000	618000	0	2120000	244000	2360000	714000	669000	848000	2530000	165000	526000	444000	760000	845000	244000	524000	330000	1000000	501000	73400	462000	989000	359000
DLGSLADAYTEVANR	721000	1630000	2710000	2140000	456000	3900000	1590000	1120000	1960000	6750000	428000	1890000	724000	1260000	328000	820000	1250000	533000	1860000	497000	3110000	2060000	917000	2870000	1840000	NA	327000	985000	NA	1270000	2050000	3940000	443000	1600000	583000	2320000
VISSANLQQVDR	923000	35300	4830000	0	1950000	1350000	27100	129000	1010000	734000	17600	136000	121000	0	0	23700	978000	941000	83000	1030000	920000	848000	479000	734000	0	199000	139000	877000	638000	12500	1170000	76000	14800	494000	135000	639000
YESGVIPYAK	77900000	202000	23000000	20500000	58800000	90000000	96600000	47700000	81700000	63000000	72100000	90900000	96600000	46000000	651000	37400000	156000000	86500000	52400000	46900000	53800000	44300000	23200000	32800000	31400000	19500000	32100000	59000000	33300000	77300000	29200000	31300000	30600000	22100000	32300000	22800000
GIAATLLEQR	1020000	1170000	42200000	211000	67700000	37100000	67300000	61100000	46900	81600000	103000000	4320000	75500000	366000	3080000	59500000	1320000	86000000	1700000	66200000	759000	71800000	30700000	115000000	431000	405000	31000000	51400000	1490000	99700000	105000000	125000000	103000000	56800000	37900000	39200000
INSASDDAAGVAIASR	0	0	0	0	397000	233000	129000	29900	0	103000	216000	0	1110000	0	165000	228000	5580	0	1230000	73300	96100	141000	0	64500	26800	0	0	40700	0	0	18300	111000	191000	0	182000	50200
LVITPDDGQPLPNGK	15400000	3580000	7970000	6490000	622000	14400000	10700000	1430000	8010000	8200000	6760000	275000	1280000	5890000	5350000	5930000	10100000	10600000	815000	7590000	6720000	5380000	4620000	6860000	7930000	8740000	3120000	4120000	6240000	2870000	8490000	4800000	4730000	5250000	7760000	761000
VLTEAAVTGK	NA	4300000	14600000	9470000	19100000	NA	12800000	16400000	19400000	7110000	10100000	11100000	19500000	NA	18300000	22700000	2970000	24900000	20500000	3280000	NA	12900000	7510000	12700000	13200000	NA	9490000	6980000	12100000	NA	12600000	16300000	13900000	11100000	32400000	23600000
SDVPALQACPQR	7340000	2430	824000	2680000	46300	7960000	26200	2560000	1330000	135000	3440000	160000	228000	0	96600	1820000	1030000	10100000	6920000	3740000	3720000	4130000	6010000	35100	2930000	2470000	2930000	90100	10800000	24400	3600000	1820000	140000	980000	0	9990000
GTLDTAGVNGR	60200000	30400000	12500000	20400000	17900000	48900000	18900000	25600000	9170000	24800000	21100000	16400000	19500000	13500000	13200000	19800000	37200000	41700000	42900000	22700000	22000000	17300000	15100000	13100000	13600000	19500000	13900000	5550000	22600000	11000000	29300000	11300000	16100000	4550000	44400000	27000000
FGNITLAK	25200000	19500000	6900000	21500000	11100000	15200000	8910000	7830000	5490000	NA	2350000	2820000	4410000	5850000	3240000	10000000	1080000	6110000	12300000	6310000	1040000	NA	7660000	8120000	9090000	2170000	6270000	4690000	8080000	4360000	NA	6370000	5370000	7020000	13700000	13900000
LAGELIDAAASK	46600000	NA	18200000	38500000	16800000	NA	1750000	3620000	19600000	29200000	963000	3570000	2120000	2240000	11200000	18700000	39100000	34900000	35200000	17400000	29900000	27500000	13500000	22700000	20400000	NA	18300000	5570000	19700000	7680000	26800000	22400000	21700000	4120000	26300000	20700000
LAQEDPSFR	50900000	3810000	NA	3840000	10900000	10300000	8290000	5190000	3490000	37800000	9290000	8430000	892000	1420000	1020000	2750000	4060000	2150000	14000000	22200000	NA	1360000	5170000	19200000	7100000	NA	21500000	4040000	25900000	20200000	35300000	26700000	3290000	21900000	40900000	19900000
SVIVIGPELK	0	0	0	0	0	0	0	55400	0	0	9140	0	0	50300	649000	290000	0	0	130000	0	27300	2070000	1400000	588000	2360000	0	0	1920000	5370000	0	3020000	1710000	1270000	2680000	2060000	1460000
LATSVESTPDAK	7990000	733000	6710000	7390000	4380000	1480000	7860000	8670000	2360000	8690000	8660000	2110000	2150000	20400	638000	4220000	540000	1240000	1260000	5950000	904000	5880000	1880000	5750000	8870000	1100000	9680000	2540000	7500000	12500000	16600000	5810000	2010000	11200000	8170000	5090000
LENASGVNTER	2820000	4250000	7270000	2170000	171000	223000	4040000	8020000	23800	58100	1080000	1480000	4660000	25600	103000	5100000	1480000	777000	1140000	3250000	1140000	1660000	86900	2520000	3580000	200000	35800	4420000	5500	1170000	1600000	2230000	181000	858000	4360000	2160000
IAINGFGR	31500000	38900000	543000	35300000	21900000	21300000	15800000	18300000	385000	19600000	19300000	14800000	20000000	19700000	475000	26500000	230000	504000	29600000	18200000	635000	24000000	12200000	21000000	17900000	1180000	831000	14100000	31400000	12700000	19900000	24500000	21800000	14200000	31700000	24000000
VPTVDVSVVDLTVR	0	124000	3480000	6200	81400	NA	2930000	0	0	2260000	626000	1090000	264000	0	0	0	0	0	642000	405000	1140000	6370000	0	1150000	0	0	0	0	0	354000	2000000	1740000	0	3380000	0	0
ALETLTPR	39700000	43100000	28600000	40900000	20700000	33900000	25200000	27200000	NA	32500000	29300000	25300000	25100000	19000000	5000000	23900000	5130000	NA	29400000	19700000	23000000	NA	14300000	1730000	22000000	29700000	23400000	18700000	28200000	22000000	23800000	18900000	19700000	20300000	5940000	30800000
QAYLTGDATSPLR	3960000	2230000	3030000	352000	5710000	4730000	3340000	633000	8010000	5030000	417000	1270000	333000	179000	167000	6610000	1190000	8310000	4870000	5140000	7340000	4940000	2440000	5860000	524000	5300000	606000	2390000	4880000	170000	4470000	5620000	821000	2500000	2990000	6250000
VDGAIFGR	22300000	24300000	43200	32600000	216000	24500000	26400000	21100000	735000	25500000	30600000	21400000	18800000	17400000	385000	41600000	281000	45600000	51700000	31000000	27900000	2780000	2280000	44900000	41500000	19900000	3110000	35600000	5240000	35000000	58400000	85700	44300000	27900000	81700000	64600000
AILEESR	39500000	55300000	32600000	6590000	30700000	27700000	12900000	38300000	46000000	44700000	35400000	33900000	14800000	24800000	2100000	57900000	3670000	52200000	61300000	28600000	36900000	39300000	42500000	44600000	48700000	44100000	39800000	35600000	51200000	40600000	55900000	53400000	39100000	35700000	86900000	59000000
IADQTGNVEAR	7510000	5800000	1670000	969000	962000	1390000	1520000	880000	1170000	NA	NA	3940000	2800000	524000	720000	2720000	6630000	1090000	4540000	467000	1460000	1680000	278000	1960000	1060000	912000	2080000	954000	1480000	1990000	2640000	NA	659000	708000	1740000	NA
ADSACDPVAAVDAVTK	2360000	783000	3310000	780000	1200000	1640000	518000	2120000	6180000	1200000	1060000	456000	552000	234000	546000	1300000	972000	5890000	873000	4450000	566000	2550000	477000	1100000	478000	NA	226000	264000	9930000	1130000	4960000	13500000	739000	460000	1220000	2060000
NGVILITTK	2790000	26700000	16700000	7650000	15900000	291000	27100000	25200000	17900000	127000	12100000	630000	21000000	22900000	91000	16900000	53100	7160000	15400000	4240000	1630000	336000	6900000	17800000	527000	5890000	231000	16900000	17100000	155000	16700000	12700000	19100000	27800000	14400000	10400000
ADGGSLYYR	19500000	493000	14800000	1210000	7080000	NA	24000000	18900000	52100000	23900000	820000	2390000	424000	480000	1190000	2080000	258000	1180000	347000	27600000	869000	36300000	22300000	24800000	17000000	1550000	25800000	5820000	1880000	1360000	30700000	10800000	30500000	16300000	29200000	43800000
TSNSIQNPR	23000000	7890000	13400000	8170000	10200000	24900000	24000000	17900000	17100000	7850000	21200000	25000000	550000	17400000	17400000	20200000	37500000	26700000	46400000	24100000	35700000	33000000	22400000	30300000	32600000	44000000	33800000	13300000	30600000	10400000	29200000	46300000	19900000	15000000	38000000	38700000
AEYTTELAQDLK	2160000	2740000	2540000	1180000	5440000	2890000	2240000	3990000	8090000	5990000	4580000	8010000	NA	1810000	993000	4020000	7320000	8950000	NA	14600000	2960000	NA	2000000	4660000	8620000	5890000	737000	5020000	5390000	4210000	4800000	7590000	6320000	6450000	6470000	5680000
VSITSEPLVR	5930000	5890000	3570000	1800000	828000	4980000	2010000	7400000	2140000	9980000	NA	7180000	11400000	7890000	2740000	11000000	NA	1710000	21300000	10800000	10400000	4160000	12000000	NA	4950000	18400000	6530000	11700000	15300000	4680000	23500000	37600000	14200000	13300000	15100000	NA
VAEQYLR	8020000	4250000	10200000	11700000	7640000	3270000	12000000	10900000	3270000	10600000	11800000	6400000	3490000	2610000	1630000	13000000	727000	5210000	7320000	12200000	2430000	11500000	2310000	NA	9120000	2910000	7410000	3670000	21400000	15300000	25500000	18200000	20100000	14500000	16000000	23200000
VAEPQFEGQTK	28900000	23900000	20300000	12400000	23500000	19700000	14300000	17500000	14100000	13700000	14300000	11300000	15200000	13800000	11100000	11400000	19700000	16800000	25500000	13100000	8410000	12100000	10200000	12500000	14400000	12100000	5090000	11100000	14500000	7340000	14100000	16200000	7980000	9360000	24100000	16900000
EYGEDDSLDVR	6630000	3710000	776000	448000	1170000	3530000	230000	1080000	936000	372000	5920000	2390000	501000	2320000	153000	2530000	1530000	3350000	5150000	3010000	523000	585000	1060000	2510000	3420000	385000	688000	2810000	814000	1880000	551000	1600000	1690000	934000	3410000	1670000
SPVSPVVAAAK	18800000	10700000	4370000	8600000	7860000	12400000	6580000	1500000	2610000	10200000	5130000	5030000	7390000	4660000	1790000	9490000	NA	1950000	9600000	4010000	11800000	6160000	4900000	NA	2630000	14400000	9550000	1800000	3640000	1790000	8360000	8180000	1310000	4470000	6170000	7150000
VGAFGGAGVGK	NA	916000	888000	1760000	1350000	690000	1410000	2340000	1980000	148000	NA	1460000	1750000	917000	24000000	2360000	NA	1650000	3930000	877000	2180000	4110000	5250000	7430000	9410000	1430000	3020000	7800000	15200000	6240000	NA	19200000	16600000	7490000	3220000	7180000
GVQNVLQR	86700	5180000	66800	262000	3380000	82100	3520000	4750000	3160000	679000	4160000	3760000	5170000	1920000	5570000	304000	1650000	10400000	17700000	74000	2200000	489000	17000000	745000	43600000	38300000	25000000	429000	229000	111000	68000000	52100	186000	91400	145000	367000
VVDAIGNPIDGK	33300000	28400000	31200000	27300000	16600000	29200000	31800000	30000000	27700000	29100000	31500000	19600000	24300000	13000000	19100000	16500000	25800000	26700000	25800000	22000000	23300000	23700000	17400000	23000000	25900000	205000	13200000	20900000	18800000	26200000	27300000	24600000	29400000	18800000	32200000	29600000
GPAQTIPAVR	7610000	15400000	604000	6190000	7810000	3050000	8330000	11000000	9100000	6960000	NA	9560000	828000	1670000	1630000	1690000	2000000	1520000	9130000	NA	2180000	10200000	6370000	1690000	17000000	25100000	10400000	16100000	16100000	4390000	21900000	13100000	10600000	36000000	9470000	10700000
SAALDSCPQR	22200000	13900000	2900000	12300000	2300000	15700000	3640000	2550000	4090000	10200000	17400000	14900000	5190000	2790000	4050000	6630000	6770000	21200000	26800000	11800000	16400000	16100000	14200000	15700000	11100000	13200000	23100000	6320000	28500000	5870000	10400000	14200000	13000000	7840000	38200000	21000000
EIIAQSELAPILNR	520000	19900000	192000	830000	533000	1130000	1480000	1380000	NA	1440000	1390000	305000	2110000	2870000	2790000	272000	25500	36700	2510000	NA	1590000	390000	841000	123000	799000	0	427000	194000	2400000	878000	554000	11000000	577000	487000	607000	258000
DVQAAEQER	842000	1770000	54600	59600	NA	336000	27700	375000	486000	1480000	144000	2470000	520000	326000	42900	1260000	135000	221000	5270000	250000	3190	1150000	80700	76000	117000	89700	66200	748000	19300	209000	7790000	977000	0	87200	5910000	161000
VVNDAVGEASR	18200000	9660000	121000	8390000	3230000	2510000	4550000	4230000	NA	7160000	5010000	5340000	4720000	2810000	1460000	2010000	8770000	8020000	9840000	3390000	6920000	3500000	2960000	8210000	NA	5860000	2160000	2590000	1850000	5620000	9050000	9690000	4740000	3200000	11500000	6530000
SNYLQDPSAALYEK	1580000	2130000	1510000	1230000	2130000	3320000	4680000	3650000	4740000	2540000	2090000	1250000	4860000	3290000	40700	2860000	871000	3940000	4350000	3110000	NA	3040000	1590000	3090000	3630000	2800000	1510000	2110000	1980000	1830000	4300000	5760000	1890000	1440000	2830000	2460000
SPLGENTLLLR	1120000	408000	825000	1420000	4210000	474000	17300000	13700000	0	10100000	1040000	595000	8380000	1280000	322000	15700000	13300	33100	547000	1530000	0	17500000	4660000	8690000	10900000	0	78100	7920000	6230000	866000	7590000	766000	5530000	4120000	5350000	NA
QAAQPIADAAEK	29300000	23800000	20400000	43000000	17400000	13600000	19600000	23900000	23900000	19100000	12900000	11600000	19700000	15600000	16100000	14800000	21500000	16300000	21600000	15300000	13400000	16200000	14700000	18000000	20600000	11900000	12200000	11300000	16900000	13000000	11200000	10300000	14600000	13600000	30700000	18700000
EALAIAEANK	4370000	5950000	NA	9020000	6010000	7560000	14000000	11400000	2280000	7610000	7460000	4840000	3820000	9670000	6240000	9570000	2290000	3950000	15500000	NA	2660000	4420000	9570000	NA	13000000	4720000	7780000	10900000	9250000	10200000	14300000	10100000	17600000	NA	23900000	15600000
ITGGTCLACR	3080000	160000	2290000	3350000	2580000	507000	915000	994000	408000	1040000	1510000	NA	96900	0	73000	176000	274000	5910000	3450000	3990000	1260000	4740000	4060000	7440000	4670000	2310000	1380000	11400000	9770000	1080000	1500000	9280000	424000	8720000	5180000	9110000
QYLQPVPAK	43800000	52100000	40800000	19200000	35000000	23500000	35600000	31500000	41500000	32500000	21600000	33200000	36500000	36400000	27800000	21600000	20700000	26100000	16600000	47400000	31900000	15800000	20700000	54300000	53200000	68700000	21700000	65500000	40900000	74000000	77800000	59400000	53200000	46200000	32800000	26800000
EFIPSIEK	16700000	1430000	7630000	14500000	6920000	12100000	11400000	9750000	617000	11600000	12400000	3470000	725000	642000	1270000	6270000	96900	12700000	13400000	8700000	4620000	11500000	8870000	15800000	10000000	10400000	980000	7400000	10700000	721000	12200000	10900000	8480000	9860000	11100000	9200000
TLILINGK	1530000	4260000	2490000	1460000	5510000	379000	3210000	5660000	255000	918000	5650000	3690000	5940000	71500	0	4890000	76900	89400	6940000	1420000	NA	4330000	1320000	1850000	3770000	0	798000	3740000	4050000	2100000	2130000	2680000	3090000	2850000	4770000	1910000
GETGADISAIPTDAIK	1770000	601000	509000	1300000	1080000	2040000	634000	173000	2590000	490000	728000	566000	844000	628000	447000	434000	4580000	2160000	1200000	2650000	1510000	350000	806000	1790000	152000	2640000	59700	296000	1060000	2420000	4320000	4160000	532000	467000	511000	467000
GDTFLNSTK	0	8080000	1930000	43600	0	0	2050000	2100000	2460000	2090000	1900000	1560000	285000	23800	308000	2830000	57400	85300	3790000	NA	114000	4200000	3110000	3390000	3840000	62500	568000	41300	2710000	2290000	335000	1550000	1370000	2990000	8040000	4720000
LLISPTVPGEGYSFESK	1460000	136000	3400000	9300000	2640000	7310000	2110000	2120000	267000	4800000	240000	983000	363000	0	0	547000	260000	5960000	831000	3450000	5220000	3250000	1390000	5720000	4730000	5710000	1610000	85800	3070000	916000	4380000	3980000	902000	1520000	1470000	2430000
TDTNPFFVK	102000000	68100000	26300000	2820000	42200000	6860000	88100000	2120000	18400000	120000000	1130000	126000000	57800000	40400000	89200	88100000	0	6750000	573000	594000	0	89100000	60000000	170000000	99600	0	92500000	74000000	224000	122000000	176000000	163000000	85300000	79600000	65800000	124000000
IICNEVTAGNEEGGR	2790000	8080000	3890000	219000	6780000	3610000	19600000	13600000	11600000	6590000	7830000	19600000	9980000	7990000	7610000	1650000	1810000	5250000	787000	4330000	2320000	2430000	398000	5990000	6390000	458000	64400	1330000	32800	512000	1230000	1410000	0	55300	55000	3020000
DGTLPENSPGK	24100000	22700000	6980000	8690000	6730000	20500000	39200000	38900000	30100000	29800000	29300000	230000	20900000	11600000	13300000	6850000	33100000	29000000	8690000	15000000	24300000	6580000	2090000	26300000	21000000	17900000	6410000	5430000	1600000	12500000	11800000	9600000	1720000	1400000	2300000	8940000
LQIPAGAANPSPPVGPALGQR	850000	171000	3970000	4880000	755000	28800000	348000	177000	12400000	207000	1350000	1820000	600000	378000	126000	384000	1120000	45800000	2180000	19300000	13800000	18700000	19100000	43600000	934000	369000	8570000	16600000	24500000	332000	36500000	60400000	861000	14500000	112000	89100
TSPASYFLK	0	59500	0	273000	4140000	0	4280000	171000	0	1730000	0	0	399000	0	0	1060000	0	0	0	29200	0	5960000	5090000	4390000	NA	0	62200	8220000	0	53600	0	0	4240000	7440000	7130000	175000
QLQEIAEAK	16400000	7280000	790000	8030000	3320000	7260000	3420000	6450000	1380000	9150000	7270000	4180000	444000	683000	2050000	6320000	10900000	NA	11700000	7720000	5340000	12100000	5190000	19600000	8010000	6600000	15100000	7750000	7990000	9700000	12700000	16100000	7770000	3860000	17700000	15900000
GGIIDQVDATR	6530000	6610000	8700000	4300000	8420000	11700000	6380000	4530000	5120000	1670000	10300000	9800000	11100000	6860000	8300000	2070000	8610000	7890000	15600000	5870000	9030000	6880000	10100000	10200000	8890000	11600000	9340000	9430000	6750000	5630000	17500000	12900000	8590000	7480000	15000000	2860000
GVPIATPVFDGAK	5430000	374000	108000	3430000	909000	378000	73600	797000	743000	4140000	522000	913000	101000	0	153000	91500	NA	1090000	497000	497000	NA	144000	1390000	425000	384000	5360000	2630000	127000	3190000	126000	4990000	4170000	17100	90000	247000	374000
AGLDTSGQSILFDGR	277000	2620000	291000	1390000	987000	253000	1280000	1700000	2040000	1010000	713000	1780000	1690000	108000	52400	208000	110000	18500	6790000	177000	263000	4420000	379000	6020000	223000	209000	742000	3280000	NA	1940000	325000	199000	1810000	3120000	2890000	612000
SVIVTGPELK	20500000	29000000	26200000	39100000	32000000	27600000	22700000	19000000	26200000	21100000	28500000	18300000	23000000	15600000	19900000	41200000	30900000	54200000	44600000	20900000	25600000	36300000	43600000	28300000	33200000	31900000	21600000	29100000	37200000	12800000	33000000	36000000	27000000	37600000	56800000	54300000
APYSLINR	1780000	1090000	562000	2350000	4730000	1030000	4010000	4310000	1390000	631000	624000	1490000	373000	1390000	1480000	2110000	337000	1050000	2370000	898000	40600	3430000	3560000	2690000	998000	498000	697000	1340000	4870000	2780000	982000	576000	2210000	4330000	2450000	321000
DVTDDATGISQK	9660000	6890000	1910000	6650000	2600000	7530000	3870000	3920000	4520000	6640000	5180000	4130000	4020000	2510000	3190000	5510000	12400000	12600000	9940000	6060000	8710000	6910000	6070000	13000000	9660000	12900000	10700000	8140000	10400000	9080000	12700000	16200000	8210000	7760000	16700000	10600000
AIDSLIPVGR	6690000	2960000	1910000	2600000	3690000	502000	3160000	2010000	14500	1410000	5620000	536000	1770000	345000	101000	1040000	0	33400	2470000	313000	55300	892000	499000	676000	3380000	0	134000	3110000	639000	1990000	5980000	4480000	1980000	4950000	796000	128000
LDLAQYR	20300000	31600000	20700000	19600000	30900000	2820000	35800000	926000	37400000	21500000	23700000	20200000	568000	2860000	286000	19800000	1120000	5690000	NA	5370000	164000	11800000	12600000	15300000	541000	1090000	7000000	22500000	22700000	24100000	14500000	23300000	19600000	19400000	NA	NA
NVISALQSSGGK	7540000	4820000	420000	8640000	5080000	661000	10900000	9510000	745000	9550000	7960000	4010000	615000	961000	353000	6230000	1980000	592000	9920000	4510000	406000	3790000	4280000	6260000	8670000	191000	3140000	9840000	5550000	7160000	9640000	5610000	1730000	12600000	5680000	3980000
AFTGNEFNINAFGGR	124000	120000	484000	726000	803000	2370000	548000	1140000	37100	75200	424000	1170000	3950000	1110000	1050000	458000	16300	251000	4190000	211000	42200	10700000	211000	15100000	20600000	30200	44400	4560000	2510000	191000	20500000	2320000	8820000	7380000	495000	5860000
AVILFNDGACK	58900	416000	713000	340000	281000	NA	1040000	1730000	769000	262000	306000	1110000	146000	105000	332000	2260000	940000	765000	266000	1460000	236000	4240000	5080000	7930000	9670000	387000	2960000	4150000	10100000	155000	6640000	236000	9870000	3780000	18000000	NA
VAGQYAESTR	6260000	33900	2740000	4680000	3050000	4360000	398000	463000	2250000	3410000	1100000	23400	136000	0	108000	88500	214000	2910000	6620	2130000	1350000	3070000	1780000	4880000	183000	3910000	1060000	190000	3520000	351000	3590000	3890000	28800	281000	1430000	97200
GNGLSVETPSVRN	11600000	6450000	582000	3740000	3590000	368000	303000	490000	216000	10900000	9250000	537000	5740000	6560000	350000	99900	1060000	1450000	NA	5520000	11900000	5770000	7520000	664000	453000	31100000	9730000	5180000	19500000	721000	18600000	18100000	255000	1070000	4340000	9090000
DGDGNVIPR	11300000	7940000	1300000	1850000	1170000	3450000	2260000	2140000	8460000	6160000	4680000	5850000	4570000	1540000	1150000	2080000	NA	NA	5380000	1260000	786000	4200000	7820000	16500000	11300000	3640000	5290000	4230000	6470000	1320000	1950000	3960000	6070000	867000	2560000	1630000
NAEPPDEETAR	75200000	44500000	30900000	77700000	38500000	50300000	27500000	35700000	30500000	39700000	40100000	33700000	31900000	8290000	20200000	35100000	60400000	54400000	59400000	34600000	45400000	52700000	21200000	36100000	34600000	39000000	50200000	23400000	56500000	26900000	39800000	37500000	12100000	45500000	45500000	44700000
ASVAGLALAGAEK	4580000	9000000	2250000	1380000	545000	921000	8450000	4230000	815000	NA	1130000	4520000	4140000	2850000	738000	2590000	847000	256000	10300000	1270000	313000	3850000	726000	NA	5670000	1350000	814000	4540000	2960000	924000	3660000	3710000	3910000	4310000	2300000	6730000
LGTYNPLLAK	89400000	4810000	27900000	96800000	25500000	89200000	1070000	47500000	36700000	74900000	101000000	55900000	3290000	2250000	5060000	3110000	47100000	116000000	123000000	68900000	112000000	82300000	81300000	106000000	81800000	104000000	67200000	77700000	62300000	65700000	114000000	112000000	73200000	75000000	138000000	133000000
LPGISETAK	16200000	12500000	10700000	6890000	12300000	16900000	17600000	19300000	17400000	10600000	14500000	10400000	12900000	8470000	378000	16000000	3350000	10400000	12500000	18200000	8120000	7460000	8900000	13700000	16100000	4510000	10500000	15100000	9740000	15800000	16500000	8180000	4490000	19600000	11000000	17400000
YLGVVLGPR	228000	26200	7300000	3650000	0	0	3940000	3850000	0	2560000	98800	115000	5360000	413000	0	390000	0	0	208000	730000	0	2240000	4590000	1510000	10300000	0	0	16200000	12400000	15700000	17800000	234000	617000	27500000	4220000	5430000
IGINPIVTGLR	0	2740000	7710000	0	2930000	0	3100000	4650000	0	638000	62900	192000	0	4180	0	4310000	0	0	1090000	0	0	4620000	1600000	1650000	6130000	0	0	0	0	0	1590000	0	1690000	7670000	852000	5040
QGFNVDPLLNR	3150000	29600000	1510000	7240000	17600000	109000	30900000	28100000	0	18500000	2550000	1300000	1290000	19400000	520000	8730000	0	0	555000	518000	0	23000000	13400000	42500000	41000000	0	0	20700000	116000	1040000	24200000	799000	36200000	23200000	7750000	12700000
INGLNPNIVR	12400000	447000	1490000	6550000	5040000	532000	383000	7970000	222000	7750000	9680000	7930000	5070000	1430000	96200	3610000	214000	868000	10200000	531000	586000	7440000	1540000	11200000	7370000	543000	180000	4880000	465000	925000	7840000	535000	3580000	948000	6460000	3680000
LVDLSASAPGQR	89700	62800	5830	0	0	5200	26900	0	33900	54400	18900	34000	622000	0	0	11200	0	56500	0	66500	52300	635000	1980	42700	90000	124000	174000	20400	223000	0	130000	99900	0	37500	184000	712000
AVQPTGNYAIIK	91000000	196000000	106000000	98100000	99500000	105000000	212000000	168000000	137000000	94300000	67300000	91400000	138000000	124000000	102000000	94600000	109000000	85500000	34000000	109000000	85500000	66300000	79800000	175000000	155000000	160000000	63500000	109000000	205000000	140000000	147000000	127000000	130000000	97900000	73100000	110000000
GSQTVSVWK	NA	733000	323000	21100000	473000	4880000	3700000	456000	377000	24100000	1520000	1430000	500000	484000	277000	184000	1340000	1020000	1650000	10500000	3500000	8280000	11000000	37200000	91400	596000	2540000	205000	26300000	36600000	34800000	26200000	2800000	12000000	NA	23200000
VTAADGATDR	42700	3080000	435000	0	96100	312000	521000	693000	251000	104000	11600	505000	1280000	569000	0	0	56700	360000	122000	155000	73700	238000	80800	257000	208000	39400	91500	86500	42000	111000	21200	45800	0	0	4290	144000
DAAAVDPVSLINFDK	1220000	326000	13600000	4200000	12400000	473000	23300000	22100000	568000	15400000	12600000	758000	21800000	595000	46600	13700000	946000	796000	19600000	1570000	1040000	12300000	4610000	13800000	16900000	0	43300	5380000	73300	232000	4380000	979000	11400000	5980000	6240000	6880000
LIDIVEPTEK	79900000	55100000	21000000	38400000	480000	75800000	1130000	2460000	35600000	46600000	36900000	25000000	28200000	19400000	23300000	659000	70200000	57600000	63200000	37500000	38500000	40200000	25800000	30800000	1000000	42700000	30000000	18100000	42700000	25500000	44500000	29300000	32800000	16600000	61200000	53100000
LVEALDSYIPEPVR	199000	590000	216000	8050000	14300000	211000	18400000	14400000	3280000	11900000	696000	1400000	11100000	304000	553000	1390000	916000	331000	119000	11300000	68700	19300000	138000	18200000	21100000	681000	346000	8040000	19500000	1090000	24300000	578000	5770000	13400000	758000	5620000
AGENCGILLR	14500000	775000	6790000	20600000	17100000	745000	12400000	7490000	2350000	11100000	16900000	8200000	1310000	902000	11100000	2640000	2120000	2060000	NA	7940000	1960000	19300000	23700000	NA	NA	249000	227000	NA	1870000	2570000	2370000	7380000	NA	17600000	25400000	36700000
GAPYGPLLAPK	18000000	978000	77900	13600000	13600000	400000	10300000	8970000	102000	10600000	10700000	1300000	410000	3220000	11600	9010000	90100	199000	15200000	13400	53100	7570000	6150000	5220000	4650000	286000	1330000	2560000	4850000	455000	5830000	5950000	1760000	2690000	9260000	10100000
LEYDPNR	101000000	94300000	66100000	91300000	90300000	61700000	58800000	56900000	96900000	47000000	49300000	65200000	81700000	51800000	52700000	64000000	74200000	76800000	84700000	69900000	48800000	42900000	49200000	68200000	48900000	52100000	68800000	38000000	74000000	58900000	55500000	74100000	33700000	50700000	144000000	107000000
GVSAGDTVQSGEDSPIK	6340000	78200	2740000	2910000	3720000	389000	3120000	4130000	932000	1920000	161000	4080000	215000	81200	36500	1510000	609000	255000	362000	1910000	667000	1330000	904000	1020000	1950000	867000	0	769000	2580000	49200	1050000	776000	258000	301000	3000000	1520000
SGLYSVVAGDGAGR	840000	375000	1760000	458000	2700000	95900	4730000	4030000	498000	2250000	3090000	1470000	3080000	2480000	0	4100000	50500	214000	4610000	67600	77500	4110000	2630000	6470000	8960000	185000	475000	6520000	5850000	0	8330000	3650000	8370000	6470000	4960000	4980000
TNVYGQFADR	NA	3810000	22600000	19700000	44600000	1050000	86100000	68000000	4160000	78000000	63700000	1320000	2110000	4240000	3190000	3690000	670000	3770000	78800000	52700000	4370000	41500000	22900000	32600000	38100000	1060000	NA	11600000	29300000	11900000	NA	62400000	25900000	12100000	23900000	40800000
AISDAAFAEK	154000000	64800000	36000000	37700000	61300000	119000000	92100000	73700000	77200000	144000000	90400000	114000000	75400000	57100000	44400000	58000000	75000000	123000000	126000000	74400000	72500000	54300000	37500000	66500000	41800000	79000000	50500000	18600000	45100000	17400000	35700000	88700000	31500000	19200000	39600000	69700000
NTQLVTGSTK	85200000	58400000	42500000	31100000	80300000	94600000	117000000	113000000	96200000	76300000	58900000	78800000	95600000	59400000	43800000	51200000	69400000	58100000	78500000	68300000	44700000	36000000	27200000	45100000	44500000	54400000	27800000	12400000	31700000	11600000	26800000	65500000	24800000	11300000	34000000	35200000
IDTNTVAK	69900000	36800000	35200000	35600000	60400000	99000000	64000000	76400000	68100000	69200000	52300000	71800000	60800000	33600000	30300000	29000000	68600000	72200000	55400000	45600000	48900000	42200000	20200000	36800000	40000000	40600000	35700000	19700000	25700000	18000000	39800000	46700000	24500000	7710000	30800000	31200000
GDLETLTR	NA	731000	31900000	2020000	51800000	63500000	NA	NA	64100000	NA	11800000	NA	133000	366000	2380000	594000	1200000	50700000	NA	10000000	NA	NA	21300000	NA	NA	21200000	535000	169000	1510000	611000	10100000	NA	554000	1870000	1480000	8460000
ANFPNPDDYVVLPDVVSK	0	522000	4970000	9500	7050000	36500000	55900000	31800000	530000	18400000	131000	157000	20900000	4960000	42700	13000000	92900	8630000	263000	132000	470000	31400000	35200	47800000	88300000	233000	0	28600000	56100	0	21100000	35400000	40600000	32200000	0	3350000
EPLGPLVR	396000000	616000000	7700000	474000000	228000000	485000000	895000000	3040000	352000000	430000000	342000000	448000000	244000000	859000	9880000	442000000	23100000	486000000	4580000	520000000	308000000	168000	2760000	761000000	717000000	405000000	621000	566000000	816000000	874000000	828000000	899000000	657000000	566000000	552000000	497000000
DGGLIYSPPFR	243000000	378000	220000000	181000000	210000000	0	591000000	405000000	17100000	440000000	404000000	433000000	0	321000000	0	241000000	0	163000000	326000000	395000000	481000000	441000000	298000000	1010000000	850000000	736000000	0	461000000	736000000	501000000	1140000000	1330000000	679000	0	0	296000000
VITEISPVR	5640000	4040000	699000	425000	1810000	6180000	7210000	6560000	7950000	1470000	2820000	9750000	7160000	1670000	3170000	9470000	17700000	NA	19900000	8170000	NA	19400000	6760000	12700000	3190000	1580000	2620000	789000	7310000	7050000	13800000	11400000	641000	8180000	13900000	18900000
AQNFDGNVSPR	23400000	6440000	246000	8630000	10600000	NA	18300000	20300000	3280000	7050000	10300000	805000	2900000	1480000	2840000	12100000	4340000	1470000	NA	12500000	654000	11700000	7460000	9200000	13000000	431000	1410000	8310000	NA	4650000	1210000	8220000	9590000	NA	11100000	10300000
LETAYAGEAR	3330000	12400000	3570000	17600000	3320000	1990000	6420000	5190000	6010000	2890000	5520000	4330000	1740000	3690000	4100000	14900000	19100000	8640000	7810000	4530000	4540000	5830000	3580000	3290000	6770000	5520000	3340000	4550000	2140000	14400000	12800000	3000000	4830000	2500000	11400000	4260000
VEGAIFGR	38500000	59000000	43900000	63900000	27800000	40000000	38600000	36900000	26100000	26900000	30800000	19200000	24100000	25000000	30500000	38400000	1860000	41000000	847000	15300000	26100000	23400000	25000000	32700000	25300000	14800000	272000	20500000	26600000	19100000	20700000	21700000	12800000	17300000	36100000	36500000
FAEAVGGVK	4700000	6070000	4810000	11000000	3100000	1280000	1410000	2260000	788000	885000	1660000	2620000	1050000	1780000	570000	7050000	981000	557000	3120000	2830000	534000	1400000	2280000	3450000	2200000	1070000	743000	2830000	2570000	7180000	3200000	1020000	2440000	6280000	8630000	4090000
LLGAEVVPVTSGR	6750000	0	5730000	4800000	138000	188000	51300	0	25400	8040000	7870000	0	0	61900	32100	30600	14000000	157000	1600000	5500000	6790000	10300000	9320000	293000	343000	12700000	1070000	64200	11100000	99500	14500000	613000	12300000	6660000	1410	2230000
VLNGNSGTVLGLNSR	2150000	14500000	123000	921000	2620000	2080000	314000	5360000	1040000	0	389000	303000	3050000	1030000	0	245000	46400	337000	3580000	121000	0	109000	0	46200	1160000	0	0	33700	0	0	0	0	9110	2270	0	0
FPDTNLAESLQR	1400000	96300	3370000	2530000	236000	713000	1550000	78700	18600	1400000	46500	882000	50000	45400	42800	609000	838000	492000	200000	2760000	540000	389000	799000	1820000	448000	1760000	116000	81600	3860000	117000	2200000	2210000	1470000	398000	2580000	3200000
ANGEGSQITVR	100000000	2690000	36000000	38000000	36500000	NA	33100000	25500000	1070000	13100000	21400000	NA	2320000	2940000	6240000	NA	1890000	1330000	NA	14000000	2300000	10300000	7070000	15000000	14800000	2750000	2560000	4710000	8100000	2040000	12000000	11900000	7090000	8200000	17700000	11800000
NVVGQILSR	3250000	2150000	12400000	783000	300000	22200	15300000	1080000	24800	NA	NA	1360000	12000000	614000	0	4330000	0	0	8320000	1200000	0	5910000	7070000	405000	844000	0	0	466000	2740000	6940	2910000	14600	102000	676000	1570000	2550000
WTTPGQITDVPR	4760000	3080000	25100000	8620000	4710000	6790000	22800000	13700000	6850000	3280000	4040000	5230000	10100000	209000	1230000	18700000	671000	1460000	21100000	12200000	48400	18800000	7190000	18900000	16700000	7560000	5130000	9330000	22200000	15000000	26900000	13500000	15700000	17600000	17600000	10900000
ILSEIDNENR	6900000	12300000	722000	3680000	4950000	6610000	10000000	7430000	8450000	9970000	12600000	12100000	11400000	8850000	7710000	10700000	23300000	24000000	39300000	7600000	18700000	13900000	12300000	28300000	23400000	18400000	13400000	11400000	19600000	8890000	23700000	27100000	29100000	12100000	34000000	14300000
VVDLLAPYAR	14000000	19900000	17100000	56800	474000	16400000	52600000	45400000	100000	770000	70500000	54700000	51100000	60300	35100000	553000	146000	55900000	51600000	265000	250000	45000000	196000	40800000	367000	67300	473000	46600000	20300000	150000	30700000	271000	112000	30500000	6720000	8140000
LVEALDAYIPEPVR	144000	25400000	7390000	139000	12800000	717000	13100000	10600000	909000	4950000	8970000	14200000	12800000	2210000	62800	8210000	179000	1070000	16500000	264000	543000	14300000	289000	9990000	25100000	0	59500	1720000	45200	23400	4290000	604000	2450000	5660000	103000	356000
VGGATYQVPVEVR	4220000	781000	6710000	4730000	20600	9470000	10800000	981000	9320000	7160000	785000	295000	84100	200000	952000	1260000	12400000	11500000	333000	594000	6210000	8660000	10400000	775000	1940000	14400000	433000	1170000	8730000	13700000	17500000	15300000	1770000	616000	23000000	10700000
LIEQTGVIGEK	10500000	33500000	29100000	15900000	15900000	4830000	1320000	3940000	27400000	3930000	3320000	1050000	17000000	1290000	890000	26800000	13300000	6060000	12100000	7990000	6130000	11500000	9600000	3070000	1540000	901000	4430000	1240000	11400000	12100000	7170000	5240000	3540000	10800000	18200000	12000000
FISDNTSLDQEK	955000	20800	104000	65800	145000	718000	213000	332000	0	97900	285000	0	515000	6650	0	261000	250000	926000	60000	69000	6520	477000	291000	714000	1540000	76700	0	561000	210000	82100	2000000	632000	214000	828000	811000	760000
VLPVAITVYK	677000	253000	3440000	4070000	3030000	533000	2440000	4890000	0	646000	755000	2030000	616000	944000	4100000	592000	0	0	6370000	1020000	NA	3600000	2080000	3170000	978000	0	204000	539000	820000	370000	5740000	1880000	2290000	1650000	692000	408000
TPPAAVQILEAAK	212000	16400000	9760000	65900	20300000	0	27500000	950000	NA	22500000	18100000	18200000	1220000	16300000	321000	4650000	NA	0	NA	0	NA	2400000	19100000	2560000	29100000	0	NA	NA	0	NA	NA	154000	1200000	NA	3150000	2230000
VGINYQPPTVVPGGDLAK	21600000	49400000	60500000	30600000	53100000	34300000	81400000	34900000	93500000	36900000	36400000	27200	50200000	0	0	35800000	35700000	16100000	0	17700000	34200000	33100000	14400000	19700000	25600000	20100000	3390000	25100000	46500000	39500000	31900000	17000000	13400000	93200	0	114000
ASLNNIVPASTGAAK	324000	0	0	182000	0	844000	331000	12300	0	219000	1810000	442000	33400	0	186000	425000	86900	1560000	459000	77600	1260000	0	185000	36300	87300	725000	259000	244000	1140000	0	128000	1870000	211000	0	77500	350000
VIPELNGK	116000000	67100000	78200000	91100000	2720000	91900000	1130000	3720000	85000000	86500000	70300000	78400000	71000000	56500000	1640000	53200000	115000000	110000000	69000000	101000000	113000000	79800000	1880000	2820000	3600000	88300000	4210000	88800000	80800000	1710000	70000000	54700000	82700000	1630000	55400000	67000000
VPTVDVSVVDLTCR	72500	32800	382000	154000	0	2930000	1990000	22900	5190000	83300	31200	272000	303000	25700	0	124000	743000	1860000	670000	1760000	706000	2710000	0	42200	429000	344000	89400	66900	562000	0	50500	2370000	1920000	96400	36800	187000
AYNTVQPASGK	10200000	5640000	4140000	3570000	1150000	NA	1230000	6040000	643000	5110000	3420000	3900000	6750000	3140000	3300000	5150000	5950000	1380000	4730000	NA	900000	4260000	2240000	2560000	3400000	5070000	2600000	2810000	5090000	3130000	NA	2970000	5020000	1330000	6860000	5290000
GYLSPYFVTNAEK	0	965000	310000	461000	1770000	3810000	1880000	3540000	58200	NA	1740000	413000	592000	1490000	405000	NA	0	93000	2510000	2130000	82300	NA	0	NA	NA	0	397000	25000	247000	77200	5620000	NA	2040000	2600000	1300000	139000
TLPDAAGDVQR	26900000	22800000	8810000	19500000	11200000	10800000	8820000	11600000	8590000	13800000	15000000	12300000	525000	9420000	347000	506000	8730000	11800000	19000000	12200000	11300000	11900000	9660000	24400000	17500000	14700000	10700000	157000	9450000	12800000	18900000	17700000	10900000	12500000	24300000	11300000
VLADAGFSEAR	232000000	165000000	29900000	103000000	44400000	94400000	34900000	34300000	35700000	70300000	105000000	92600000	50200000	18500000	27900000	81200000	76300000	89700000	114000000	36800000	40200000	35400000	27600000	49700000	51500000	36800000	33200000	30300000	33100000	36000000	29600000	28400000	29200000	29300000	55200000	20700000
SFDQIDNAPEEK	26100000	34400000	3120000	16700000	5380000	20700000	7790000	6100000	4610000	24400000	1020000	13000000	3080000	1500000	1140000	15600000	89300000	20900000	1690000	16100000	28100000	11600000	5140000	6220000	3600000	39000000	4660000	1700000	3520000	39000000	76200000	26300000	1940000	3730000	26200000	482000
AYNTVAPASGK	11900000	12300000	10500000	10300000	8960000	NA	593000	13600000	6480000	4030000	5380000	4590000	5460000	4470000	3760000	4700000	5420000	6090000	5410000	3540000	5090000	4640000	3890000	4990000	4940000	419000	4640000	3490000	2410000	NA	3390000	2980000	3160000	8220000	6750000	961000
ELTGLGLK	456000000	5070000	80400000	389000000	7700000	317000000	4500000	44400000	64900000	245000000	10800000	13400000	1830000	1370000	4310000	179000000	94300000	364000000	20000000	193000000	180000000	260000000	2300000	234000000	215000000	281000000	266000000	4600000	300000000	228000000	278000000	237000000	178000000	218000000	428000000	376000000
GIVDSAPAPIK	25800000	424000	3820000	10900000	1230000	13000000	6600	205000	354000	110000	247000	62600	92000	88000	30200	85400	5710000	10300000	191000	5490000	1060000	3710000	1590000	73000	178000	37800	2370000	3650000	1190000	9390000	8960000	3310000	204	304000	6170000	4630000
WLQDGAQPTDTAK	273000	3010000	376000	237000	0	108000	472000	403000	95700	0	630000	1300000	21300	1580000	205000	876000	1240000	7570	2450000	38100	0	87400	0	124000	3260000	81800	0	201000	175000	374000	806000	130000	2070000	1150000	52200	39800
QSQPNSGAGAATGIK	300000	342000	711000	0	380000	179000	1310000	1400000	380000	42900	0	249000	623000	84800	0	216000	411000	31000	0	223000	32600	91600	0	32000	50400	0	0	146000	69000	46400	28000	112000	0	110000	196000	197000
TYDWSQIANFSR	0	796000	31500	0	3380000	0	3420000	2200000	0	526000	1960000	2200000	23100	67200	2690000	795000	0	0	748000	0	0	2550000	0	4340000	3440000	0	0	306000	0	0	0	0	198000	2820000	0	0
DTTDAVAAQLR	58100000	82700000	59000000	56800000	40300000	50600000	76000000	67100000	54000000	55200000	51200000	51700000	43700000	854000	588000	41300000	63000000	44400000	37400000	48900000	45100000	42400000	42700000	76400000	59500000	67400000	27900000	53400000	61700000	62000000	79800000	56900000	50900000	59300000	35600000	44700000
GPLVFLNK	128000	434000	177000	597000	1780000	0	5090000	3160000	0	1830000	507000	697000	2480000	658000	0	5410000	408000	21700	1110000	89400	0	1960000	469000	2950000	NA	0	0	6660000	0	0	18200	102000	700000	3240000	1080000	786000
ITGVSINR	169000000	78800000	73200000	74400000	59800000	89500000	81500000	68900000	NA	65000000	61600000	56200000	60000000	40700000	245000	47700000	3630000	NA	83000000	56000000	NA	50300000	42500000	67500000	33800000	56600000	23600000	18900000	46500000	17800000	55000000	43300000	24600000	22800000	67300000	60500000
VNGEGSEVTVR	262000000	254000000	131000000	115000000	109000000	184000000	167000000	168000000	104000000	137000000	171000000	143000000	134000000	80800000	70400000	89900000	164000000	143000000	123000000	105000000	93100000	92500000	55400000	93000000	72600000	109000000	69400000	78000	102000000	22600000	64800000	40800000	50000000	3410000	133000000	86300000
IVEIYGPESSGK	17600000	18500000	12900000	10300000	9640000	11500000	12000000	3260000	12800000	8720000	9570000	13700000	20400000	9510000	1780000	12000000	2780000	12100000	15300000	6540000	10200000	9600000	164000	11300000	11400000	7720000	4500000	10900000	10000000	9230000	15100000	12500000	16400000	6920000	17700000	11500000
GGYFPVNPTDDGQDIR	5040000	254000	3410000	1850000	2640000	4940000	6570000	6230000	5040000	5070000	2270000	1510000	830000	118000	275000	4590000	12100000	7190000	1730000	7230000	6260000	4220000	937000	2430000	7310000	3870000	1700000	3700000	1370000	700000	4640000	6390000	617000	5110000	765000	1630000
ISGVSINR	339000000	26700000	186000000	208000000	123000000	209000000	247000000	181000000	147000000	248000000	2140000	158000000	125000000	39700000	41300000	937000	223000000	189000000	7050000	167000000	111000000	4750000	93400000	160000000	90800000	108000000	133000000	37800000	127000000	36100000	75900000	56200000	71100000	48300000	171000000	139000000
SFDFSNLASEGVR	70300000	0	191000000	68600000	162000000	11400000	286000000	208000000	49700000	182000000	0	0	179000000	311000	170000	281000	894000	126000000	193000000	142000000	0	0	35100000	133000000	104000000	0	33500000	16700000	101000000	14300000	85500000	64000000	48200000	137000	39700000	74700000
FDLASSEAK	17600000	12500000	9910000	8410000	8860000	11500000	17400000	13000000	12700000	5900000	9670000	8350000	1250000	9000000	1990000	9710000	NA	12300000	6700000	4630000	1830000	5520000	5900000	7450000	4090000	3930000	7190000	NA	6970000	7230000	7650000	6680000	6660000	6980000	7130000	6810000
DAGGNPTADYGR	12700000	853000	7580000	3580000	8380000	6250000	9480000	8830000	1990000	7630000	10700000	5190000	3640000	0	0	6780000	162000	1520000	4790000	5260000	20600	3150000	1680000	4830000	9640000	26800	1230000	5280000	2130000	4470000	1940000	699000	5820000	4380000	3770000	3070000
NPEYVDSVK	10200000	10500000	16500000	3020000	13800000	8310000	17300000	19300000	13800000	2420000	3210000	4950000	502000	608000	2720000	10000000	NA	3190000	1730000	3740000	4250000	3590000	3320000	3920000	2640000	2800000	361000	805000	7100000	3410000	3290000	841000	1410000	1950000	4470000	2530000
GTVGIVSKSGTLTYEAADQVVK	0	0	366000	0	292000	389000	474000	5490	661000	4860	0	0	0	0	87900	0	65800	116000	12700	266000	123000	0	0	376000	0	191000	0	0	42700	0	0	205000	8270	131000	235000	0
DLLQAEGIGTR	955000	6370000	128000	1640000	5440000	4800000	3350000	7460000	2690000	5210000	957000	2320000	7720000	1690000	228000	5460000	5300000	7420000	3550000	2370000	1510000	5880000	5030000	10300000	8470000	9930000	1170000	6790000	5560000	4150000	8730000	16800000	9330000	2040000	849000	8020000
GTITGPISDTVSYR	6760	0	2870000	592000	94800	1090000	89800	39000	1180000	82300	0	49300	44500	0	405000	619000	1460000	746000	34100	155000	1310000	81200	204000	1330000	501000	3740000	679000	3940000	83400	6050000	48600	2230000	125000	4400000	1500	242000
VQNSDVLK	68800000	30000000	28500000	34700000	31900000	30600000	7900000	25600000	59000000	31700000	19500000	26700000	44000000	37300000	25000000	20800000	9010000	37900000	15600000	58700000	25500000	13600000	25800000	44700000	48000000	48800000	28200000	29000000	48000000	30600000	60500000	100000000	53100000	17600000	959000	19700000
IATPPWDR	5880000	30600	5810000	1520000	289000	308	5290000	626000	0	2620000	40700	0	36300	0	0	0	0	37100	36000	75000	0	2540000	1630000	4040000	0	0	122000	50600	311000	617000	NA	19900	0	0	3720000	2880000
GSPLALAQAYETR	188000	1390000	292000	472000	1450000	145000	3650000	4160000	51200	1610000	2390000	1810000	645000	174000	90800	448000	0	394000	153000	362000	189000	2300000	135000	2570000	4210000	0	248000	2000000	156000	14100	4060000	946000	1370000	1820000	533000	448000
DGFIDNIQEGR	37200000	413000	17700000	8710000	13800000	24500000	2330000	4350000	13300000	21700000	22800000	346000	2970000	182000	186000	10500000	30800000	16300000	1170000	10000000	9830000	19700000	3640000	12400000	10300000	11100000	273000	2620000	7430000	5620000	7970000	8580000	4950000	7260000	2210000	9400000
VLNEAAVNGK	3910000	5140000	1440000	2770000	2330000	2180000	2640000	3480000	4320000	1690000	4040000	3580000	2850000	2370000	922000	3990000	NA	3900000	7310000	4520000	2210000	2090000	1800000	3030000	3640000	4820000	2700000	1810000	5080000	2860000	3870000	2770000	5060000	3420000	10800000	4840000
YIQTGEGPYVWER	50600	1530000	2700000	151000	3140000	285000	4500000	3290000	23300	670000	479000	1340000	1030000	26900	310000	551000	614000	109000	875000	137000	87800	265000	0	1050000	787000	0	0	401000	0	0	851000	205000	82300	111000	0	0
GGGLSGQAGAVK	574000	76900000	58400000	98100000	1650000	65600000	52300000	59000000	74700000	42600000	1760000	23400000	65300000	57500000	51000000	69700000	81300000	81100000	63300000	40100000	64200000	67800000	61400000	48900000	46200000	66200000	67100000	53900000	63300000	273000	76700000	64000000	63700000	56900000	120000000	69900000
ALQLYEPSLR	16200000	1480000	24300000	34600000	38800000	52200000	1450000	48700000	35500000	56300000	66300000	918000	51100000	1470000	775000	58300000	2530000	84400000	2020000	892000	66400000	78700000	48900000	86500000	77000000	43500000	28300000	49800000	67300000	903000	90400000	87400000	1130000	1080000	56900000	324000
YLTCSALFR	147000	0	10900000	1710000	2960000	0	5160000	488000	0	2210000	1360000	9450	5990000	29900	0	71800	0	0	NA	29600	0	6410000	2380000	2060000	1930000	0	0	1470000	29900	0	183000	0	509000	4860000	322000	825000
DNGGIEGVTYPILADSNR	43100	0	3190000	174000	1820000	3070000	4560000	4850000	2970000	778000	0	0	79300	0	0	0	5230000	2850000	0	1460000	1630000	1300000	166000	2710000	5960000	0	0	178000	1110000	0	3700000	4560000	1260000	494000	5200	539000
AGENCGVLLR	NA	200000	3960000	51000000	18400000	653000	9470000	6870000	564000	15500000	826000	134000	140000	61600	0	30900	641000	706000	457000	NA	890000	18200000	18400000	14600000	762000	NA	4970000	870000	11000000	787000	5730000	7220000	1150000	8810000	11600000	23800000
GAPYAPLLAPK	10400000	5270000	481000	2040000	7230000	93500	8430000	8190000	114000	6940000	9790000	3870000	5770000	1950000	353000	5850000	0	41400	15300000	165000	0	9170000	6350000	5870000	6830000	42200	0	3010000	NA	0	12500000	7650000	3050000	336000	13800000	13000000
YIPYDAGGK	17600000	19100000	8070000	6880000	11600000	10300000	14900000	14100000	18400000	16400000	11800000	16800000	546000	14300000	308000	7480000	1440000	10900000	5470000	NA	10300000	5980000	4930000	16700000	12000000	9960000	3690000	5960000	6440000	18300000	13100000	11900000	11100000	4730000	11200000	6140000
GFFGAPGLPADK	2130000	21100000	8070000	1570000	10200000	706000	21300000	13900000	0	12300000	11500000	15100000	469000	9670000	32000	5500000	0	0	2530000	2220000	22100	6960000	5250000	24000000	26600000	0	1220000	11500000	NA	NA	40100000	13800000	17900000	11100000	8380000	11900000
SSYDLFLR	654000	920000	129000	284000	897000	246000	286000	318000	4220000	118000	384000	1750000	1840000	1160000	4030000	771000	187000	321000	88500	356000	233000	108000	169000	339000	96000	0	4940	319000	162000	161000	109000	211000	35200	941000	339000	363000
VDVDSNPSAAAALGVR	222000	4240	447000	76400	885000	2600000	2030000	1640000	888000	2470000	37500	1770000	77600	29800	0	28800	2950000	2420000	9160000	2040000	1140000	2060000	1090000	5730000	7130000	5870000	0	2370000	1100000	642000	6640000	12900000	9750000	1450000	2280000	1460000
GYLSPYFVTNPDK	807000	8830000	5970000	1260000	9410000	1860000	22600000	13700000	325000	4000000	2520000	5360000	13100000	11600000	8820000	8080000	51900	285000	9250000	4290000	380000	4460000	3760000	5790000	14100000	33900	610000	6100000	2280000	1250000	9700000	12800000	12400000	1870000	4920000	4060000
AVEWLQNGAQPTDTAK	2010000	7340000	1370000	2350000	519000	1300000	408000	872000	198000	1180000	511000	946000	1220000	182000	0	2170000	NA	1520000	730000	604000	898000	1180000	1050000	1340000	1870000	866000	111000	1760000	776000	168000	1920000	433000	699000	669000	903000	1670000
GALTQEQADAK	24200000	23700000	7140000	20200000	5690000	14600000	8170000	7290000	9160000	9060000	12400000	8510000	7770000	3860000	5480000	8650000	21700000	16800000	7680000	8290000	10100000	8860000	7260000	9260000	10800000	10800000	7220000	5810000	8990000	7630000	11900000	8720000	7830000	8500000	17400000	11300000
SIGPYSLVTQQPLGGK	1110000	131000	1990000	909000	1930000	5060000	1810000	867000	1090000	1480000	1730000	2740000	893000	2230000	67000	1410000	206000	2580000	3240000	3300000	NA	2990000	454000	2420000	2540000	796000	594000	612000	1540000	747000	4630000	3720000	1070000	1150000	1240000	1170000
IVIAGPSGSGK	17700000	4040000	13000000	10200000	15800000	7210000	16000000	14300000	16300000	8920000	12200000	7510000	1470000	1540000	10500000	10500000	9210000	12500000	18400000	10900000	3410000	16700000	12500000	20900000	16900000	18400000	14100000	9490000	12900000	10500000	17600000	16500000	10400000	13900000	29500000	19100000
SFVDAVAK	21300000	4520000	11300000	53600000	15500000	45500000	15600000	13500000	NA	16500000	12900000	8980000	24000000	4510000	2160000	NA	3250000	31300000	NA	3980000	1830000	9600000	4310000	9940000	8240000	16600000	5860000	15100000	7720000	6200000	14800000	16800000	15700000	15000000	41700000	17700000
ANPSPPVGPALGQR	135000000	104000000	63600000	97600000	689000	107000000	84900000	73100000	79500000	114000000	98200000	818000	75800000	614000	60000000	66200000	127000000	133000000	172000000	81600000	110000000	83100000	105000000	127000000	103000000	157000000	72900000	72800000	113000000	66500000	140000000	134000000	93100000	70200000	149000000	118000000
TPPASYFLK	14000000	1170000	191000	19900000	11600000	775000	3370000	2520000	0	10300000	NA	653000	1390000	784000	765000	1980000	0	0	2370000	1920000	495000	NA	8210000	NA	5440000	0	948000	8320000	482000	540000	NA	502000	11900000	9330000	15200000	NA
INNPTNDVLEQR	2000000	2820000	NA	287000	1470000	1340000	2360000	2810000	1500000	355000	454000	NA	4950000	1830000	1700000	3470000	NA	4600000	1820000	4700000	794000	2700000	222000	2490000	4050000	3280000	719000	30300	NA	1980000	5990000	NA	2700000	2030000	5730000	NA
TVASLQTSSK	17000000	6250000	551000	1920000	2360000	14300000	1980000	1830000	1710000	6970000	6080000	5760000	1810000	411000	349000	1320000	275000	4700000	2000000	1540000	1570000	860000	1940000	1800000	2040000	1220000	159000	1080000	2220000	1340000	3160000	2900000	2850000	1690000	5470000	1350000
TITSSYYR	8230000	3300000	37300000	18000000	35600000	2960000	34700000	36300000	38100000	3990000	2710000	2530000	4780000	3610000	4540000	26700000	2670000	5270000	9830000	15000000	4380000	13500000	12600000	11100000	9130000	10200000	29000000	17300000	18300000	22600000	12600000	9350000	8230000	18400000	13500000	6010000
GFGFITPEDGSK	25100000	20600000	2290000	447000	3220000	732000	5030000	1580000	1330000	6920000	6700000	323000	2530000	1870000	2630000	3520000	188000	815000	1590000	463000	350000	4500000	211000	3670000	4820000	691000	568000	4890000	2330000	1500000	11900000	NA	5860000	1310000	1350000	2410000
GALLVGSPGTGK	16700000	1950000	10100000	3050000	2560000	7420000	3960000	5970000	NA	2680000	3430000	4220000	2230000	3100000	3780000	6050000	NA	517000	10900000	7120000	6890000	7680000	6430000	3740000	4740000	NA	2280000	204000	2740000	2050000	10400000	3740000	1320000	7100000	565000	1720000
IAMNSLNVGR	4320000	7970000	541000	3420000	7710000	552000	7070000	7950000	485000	790000	1920000	3360000	750000	1460000	808000	3970000	NA	942000	279000	1390000	424000	4850000	221000	3480000	3260000	1350000	1340000	4070000	2930000	372000	4780000	1030000	2040000	4240000	7220000	5360000
LVGPNCPGVITPDEAK	4150000	25300	4410000	3110000	38000	2250000	0	70000	2840000	640000	35500	45800	38900	0	0	85900	89900	2220000	113000	760000	8590	817000	15100	700000	895000	34700	0	75100	30400	43100	527000	630000	0	64600	0	892000
IPFATSAPGK	1990000	4600000	6270000	2400000	6550000	11300000	3810000	2280000	3980000	2860000	13200000	3330000	2350000	1100000	5030000	12900000	1510000	206000	19600000	14400000	16200000	13800000	10400000	5970000	NA	14700000	7230000	NA	3930000	8210000	9890000	14000000	NA	5580000	19000000	13900000
LGSPTGGGNFYLFQDTTDEER	NA	114000	1340000	262000	1110000	910000	4600000	1200000	0	62700	141000	21400	198000	41000	0	227000	0	248000	37200	763000	22000	158000	0	2010000	96600	0	114000	66500	47200	221000	1190000	383000	0	301000	35200	28200
EPAEALGEAQAAAVR	12000000	1050	1940000	0	0	5220000	0	928000	4790000	5110000	25900	0	0	0	0	0	13600000	13600000	86900	2350000	5430000	819000	1040000	4290000	184000	10900000	72400	199000	67100	12800000	7980000	1980000	1960000	1100000	1080000	243000
LYDLDIENR	2020000	5250000	801000	619000	2570000	7040000	4560000	2550000	1830000	3220000	3290000	151000	3830000	92600	1200000	3040000	8290000	3530000	NA	2050000	2910000	896000	2300000	3610000	5640000	4870000	76100	2240000	3760000	1770000	4990000	2940000	4720000	2860000	85200	4770000
VIDYNVK	21000000	14100000	12000000	24400000	12100000	15500000	17800000	16400000	NA	22400000	18300000	15200000	5700000	2890000	1330000	17800000	NA	21600000	30700000	17700000	NA	18000000	16000000	23600000	16700000	27000000	13300000	15100000	21900000	15800000	20300000	27700000	18900000	17900000	29100000	22800000
SGLTGLADNQK	47200000	28700000	10100000	23900000	26100000	22100000	34200000	26300000	33500000	28500000	30800000	2140000	34500000	25800000	31500000	18600000	36500000	43900000	48500000	34400000	23500000	24400000	28800000	49100000	34900000	23400000	33900000	27900000	26700000	38000000	39900000	55800000	75400000	22800000	65100000	42500000
FAEPFITLAK	0	20300000	1700000	101000	6600000	1260000	10200000	6430000	2710000	7390000	6540000	8030000	7260000	810000	5600000	4680000	0	896000	10100000	844000	0	6660000	2870000	1660000	0	0	681000	1990000	0	226000	211000	0	1740000	3100000	0	961000
LFSDLGPR	13800000	15100000	12000000	10300000	11700000	71800	14800000	13000000	168000	9800000	12500000	11400000	7560000	4220000	65100	7930000	107000	1310000	18400000	9680000	14300	8890000	8400000	13100000	7450000	137000	3230000	6290000	19600000	5110000	13800000	9400000	4940000	13300000	15100000	13500000
VVILGGGPNR	14700000	785000	4720000	10000000	9620000	7070000	5030000	7500000	NA	6680000	2460000	8280000	368000	202000	2950000	11000000	432000	15000000	NA	700000	8970000	2840000	11400000	9740000	9190000	2020000	5060000	6890000	5590000	2930000	15900000	NA	3750000	4840000	9780000	4600000
VDEGIESAEK	3500000	7680000	9800000	2320000	6390000	1870000	11800000	17300000	7700000	1200000	670000	2870000	5810000	6020000	1680000	7060000	6380000	1720000	230000	1050000	613000	789000	78100	1110000	3140000	694000	560000	2840000	571000	5310000	3610000	116000	1510000	2020000	2680000	349000
NTTWTLSR	102000000	245000000	244000000	159000000	94700000	81000000	196000000	109000000	189000000	80500000	96800000	78400000	102000000	140000000	665000	144000000	987000	102000000	78400000	101000000	52800000	102000000	109000000	110000000	121000000	122000000	103000000	71100000	189000000	133000000	101000000	128000000	106000000	4160000	91900000	63100000
ADGSSAFPEANR	36800000	41700000	41900000	14200000	30700000	21900000	41700000	52300000	34300000	23600000	23800000	25800000	38700000	32300000	25200000	25600000	20100000	18500000	18900000	30700000	20400000	21000000	12800000	26100000	24200000	20700000	15100000	28400000	17900000	33700000	19000000	15100000	11900000	22600000	20300000	18100000
AIIESER	256000	40400000	23800000	1280000	272000	20600000	24600000	27700000	31600000	25400000	224000	24600000	1850000	769000	22300000	40800000	38300000	40800000	3440000	25900000	21200000	28400000	5830000	762000	36000000	33700000	1430000	25800000	45000000	31800000	39000000	40100000	27900000	3150000	1410000	348000
AVIADDLSNFR	1810000	825000	6640000	1100000	3110000	714000	8550000	5450000	190000	5160000	4510000	4660000	247000	71900	2670000	2180000	4200	77500	1420000	192000	22100	475000	965000	2680000	1210000	205000	160000	785000	488000	118000	1630000	27400	45800	2380000	267000	306000
GALEQGENVYLR	718000	205000	1960000	1390000	57000	25900	2510000	1730000	47700	2320000	481000	2570000	78900	0	0	66400	0	529000	153000	150000	36200	443000	165000	1010000	1240000	493000	201000	303000	398000	1370000	636000	39900	27900	4780000	37800	214000
LGNDVSEVAASDR	44300	97400	0	0	247000	113000	365000	150000	349000	135000	69800	72200	742000	0	132000	193000	171000	369000	670000	1860000	35400	248000	108000	1750000	2640000	66000	105000	861000	418000	228000	3690000	5770000	1990000	157000	2790000	938000
VIYPVETPITK	8080000	948000	2850000	4380000	888000	1300000	1210000	2520000	1670000	8930000	1450000	1360000	2160000	720000	1740000	1540000	14600000	3330000	3510000	9600000	9560000	12100000	10000000	1410000	2020000	17700000	4160000	721000	15200000	3150000	19600000	39000000	14400000	4720000	804000	NA
VSDALDGLVVR	306000	0	29000	63500	766000	14900	598000	735000	0	315000	1410000	108000	984000	510000	0	198000	0	37700	5240000	NA	0	1560000	561000	3220000	2430000	0	0	1210000	68200	0	3890000	3660000	2630000	683000	1130000	643000
AVLGADGVTSNAILSPER	435000	617000	1140000	1310000	401000	817000	548000	5150000	2220000	1750000	340000	409000	302000	1250000	274000	782000	5750000	4690000	1040000	1210000	1360000	3150000	2230000	9210000	205000	1080000	164000	407000	1810000	1370000	9670000	19200000	6810000	2920000	3040000	4010000
DLGLDVVDVR	269000	788000	335000	4740000	1730000	449000	1490000	2410000	460000	3250000	1010000	581000	1380000	601000	131000	1050000	0	3940000	212000	965000	275000	4070000	1660000	NA	320000	288000	1360000	900000	200000	1500000	NA	9940000	2230000	1840000	1490000	2220000
EVIAQSELAPILNR	821000	1560000	2140000	508000	786000	3490000	2320000	5330000	643000	4750000	1530000	1110000	1240000	185000	968000	1480000	0	4950000	693000	2860000	1230000	6190000	2280000	356000	148000	2990000	592000	329000	2810000	3850000	11100000	19000000	12400000	NA	2550000	NA
VSVIDAFR	0	46600	55900	0	26000	0	33200	42400	0	831000	0	39800	55800	77000	0	193000	0	0	28800	0	0	917000	61100	34200	27200	0	0	281000	0	0	0	0	40800	131000	3290000	1160000
LYIETLEK	230000	1920000	1460000	869000	254000	387000	2810000	2400000	565000	498000	86900	1060000	984000	259000	587000	1280000	688000	824000	3660000	147000	137000	3210000	441000	2530000	1180000	258000	489000	1600000	1650000	886000	3650000	7440000	1500000	2270000	650000	3430000
ELGDELCTR	932000	5310000	2380000	644000	1370000	5100000	7990000	5450000	56300	824000	2860000	8010000	53000	5490000	6350000	3860000	197000	2420000	1630000	6360000	6190000	2150000	1250000	12900000	7420000	9670000	3280000	4920000	5060000	3400000	7130000	17900000	492000	3320000	4400000	7750000
NGEADAVLADK	9770000	14400000	10700000	9330000	9440000	11600000	33700000	19200000	20200000	12900000	13800000	11800000	10100000	14800000	13400000	10500000	14900000	9290000	4800000	10900000	7590000	10800000	6620000	15600000	17100000	14900000	6930000	10300000	20500000	18100000	22300000	24100000	16600000	13400000	9410000	9450000
SDGSLNALIAK	3950000	519000	1160000	18400000	1430000	5470000	11300000	3740000	192000	7290000	3870000	3410000	3090000	7230000	472000	978000	995000	1470000	651000	12500000	452000	2180000	3310000	13800000	7830000	4810000	6000000	12300000	7810000	3420000	15100000	23100000	5680000	5300000	3570000	5000000
SAEISSAWTK	4280000	1960000	1190000	15300000	1370000	5610000	1870000	1500000	1250000	6560000	10700000	5340000	1880000	1150000	2590000	4230000	NA	3990000	2770000	1890000	957000	4820000	11300000	9240000	8300000	1370000	8740000	3020000	3320000	7140000	6680000	14500000	16300000	5830000	32200000	4640000
ILFDGIPLDK	0	2510000	0	0	1210000	0	1350000	2580000	0	1080000	2580	71000	45800	59100	1630000	429000	178000	0	719000	0	0	1310000	619000	1490000	2070000	0	0	0	0	0	0	0	0	748000	0	0
ILGVADLER	18400000	30800000	0	7400000	19600000	23500	19300000	19700000	22200	21500000	28600000	164000	24000000	21500000	25300000	13000000	0	12700000	27700000	27400000	22900000	20000000	19200000	106000000	52000000	0	7260000	23800000	46300000	19900000	65200000	80300000	58000000	12100000	25100000	18100000
IAYVVPNTADTGDGATTAK	184000	0	395000	14200	15300	196000	24000	32200	23800	101000	130000	171000	981000	0	0	119000	287000	1530	1200000	371000	238000	8190	0	637000	2190000	147000	0	1240000	218000	158000	2000000	2420000	1770000	1710	1430000	64000
VTDALNATR	31700000	17500000	15500000	20400000	17600000	31200000	24700000	17600000	21900000	22300000	944000	16000000	15200000	10700000	7790000	7550000	1870000	17100000	9690000	13400000	12100000	9890000	7350000	20400000	13100000	24300000	11600000	9520000	12400000	14300000	29400000	28200000	9490000	16800000	10200000	10800000
TVVVTNNDDAYR	0	301000	0	0	737000	0	430000	753000	0	0	76500	141000	1070000	599000	0	147000	0	0	302000	183000	34600	30600	91500	177000	288000	0	0	353000	31500	0	39000	141000	197000	35700	323000	206000
NADGSLAVTK	2930000	419000	4820000	1200000	6190000	3890000	447000	8530000	7750000	1240000	926000	802000	598000	871000	3510000	3300000	3380000	4770000	1110000	1230000	1840000	4190000	4290000	6470000	5020000	921000	1100000	4360000	1780000	6960000	4590000	5080000	1330000	3140000	2200000	2010000
SNYLQDPSAAIYEK	1580000	2130000	1510000	1230000	2130000	3320000	4680000	3650000	4740000	2540000	2090000	1250000	4860000	3290000	40700	2860000	871000	3940000	4350000	3110000	NA	3040000	1590000	3090000	3630000	2800000	1510000	2110000	1980000	1830000	4300000	5760000	1890000	1440000	2830000	2460000
EFFPAIEK	37800000	0	0	33300000	17500000	0	24500000	18000000	0	29100000	28700000	0	14800000	11900000	0	16800000	213000	23800000	28800000	0	0	16200000	16400000	28800000	26600	0	0	8970000	16700000	11200000	27600000	14500000	14800000	10300000	17700000	17300000
GIVASTPEEAVAAAK	6760000	721000	6410000	4520000	890000	5010000	2520000	1410000	5270000	1360000	807000	841000	1250000	2010000	775000	1770000	5510000	6590000	1270000	3790000	5730000	5940000	453000	1170000	928000	2980000	1770000	1260000	2890000	3470000	5410000	7370000	2790000	1020000	5620000	2930000
ELVAIQGGQCGNQIGAK	2380000	4070000	1670000	1230000	3150000	3590000	2170000	2220000	4410000	3610000	4850000	6820000	2490000	669000	50500	155000	537000	3860000	104000	2090000	1110000	2130000	243000	2990000	3130000	416000	455000	1960000	463000	29900	2190000	6470000	1450000	1820000	527000	2770000
APFSLVNR	2520000	374000	286000	4310000	9470000	119000	528000	1560000	0	1090000	0	NA	NA	0	0	54000	0	0	33000	1150000	0	5510000	3530000	4130000	451000	0	977000	2680000	5260000	2900000	904000	749000	3290000	3650000	9520000	1980000
LSDPEIFGTK	4790000	6250000	1430000	3130000	NA	192000	7600000	6950000	146000	3090000	4790000	5600000	4890000	2210000	0	2600000	843000	32900	3210000	1080000	33700	2310000	288000	4990000	3520000	55600	161000	4660000	2400000	2100000	2550000	2900000	872000	5160000	2010000	2230000
GAAATALYGSR	11400000	10200000	9980000	464000	16100000	12400000	882000	750000	17100000	9650000	357000	491000	18700000	365000	794000	671000	394000	11300000	19000000	310000	1500000	101000	402000	31100000	2040000	22100000	14500000	614000	325000	10100000	25300000	49300000	1400000	1380000	318000	179000
ASNGVVLITTK	1520000	9010	10300000	134000	8240000	515000	8150000	7860000	147000	7980000	1030000	4470000	301000	431000	734000	6000000	52200	122000	14700000	4230000	12800	17600000	1720000	4840000	9810000	924000	17100	11300000	758000	107000	NA	NA	7840000	7390000	14800000	9020000
NNNFAIDGGGENTSFR	1380000	2660000	2210000	405000	4500000	848000	10800000	9100000	3630000	2030000	4520000	3960000	6290000	4200000	4540000	4760000	2340000	2560000	6090000	2160000	1590000	7160000	1940000	13100000	17700000	1390000	1130000	8110000	5540000	2260000	8830000	27700000	11600000	4460000	3350000	3580000
LSATSFDQK	3770000	2760000	3640000	1940000	4030000	3320000	8770000	6610000	4740000	4400000	2540000	5340000	2220000	4450000	229000	4360000	2950000	4390000	3340000	5490000	7770000	6760000	4270000	12300000	6510000	10100000	4710000	5230000	7340000	2590000	8710000	20600000	13100000	5230000	7920000	7060000
ANYINQNGK	3030000	2150000	2350000	1900000	6120000	1130000	5550000	5190000	1600000	2520000	466000	5180000	2950000	785000	1070000	121000	4800000	441000	2750000	1860000	619000	7510000	3640000	11500000	NA	NA	4320000	1110000	7650000	5340000	9460000	18700000	9470000	5180000	8700000	5280000
IFPVNLPSIQK	190000	54900	9450000	1340000	6250000	0	7460000	947000	0	1430000	6760000	0	0	0	49100	0	0	0	8100000	26200	0	7670000	1290000	2230000	133000	0	0	0	541000	0	3330000	156000	NA	3980000	1500000	419000
VQAVVNELQGEK	9660000	3920000	4820000	8190000	5720000	5890000	2480000	6180000	7590000	5900000	1340000	3250000	4570000	1300000	2450000	3200000	NA	10700000	NA	6430000	4020000	6970000	7890000	5370000	758000	9360000	5420000	7310000	6110000	9590000	13100000	10400000	6220000	5590000	3570000	8140000
GGVIESVDAGR	12800000	13800000	11500000	15300000	10700000	13600000	11800000	8580000	11300000	5130000	8470000	4170000	4180000	988000	11300000	7950000	669000	4000000	7980000	7620000	1550000	3680000	6120000	9940000	5060000	5910000	4250000	3350000	7990000	3610000	4330000	3260000	2820000	5610000	7640000	7510000
IVENATLGR	23800000	13100000	10300000	16500000	11300000	4080000	9750000	8710000	7600000	2100000	1250000	9480000	7430000	6100000	860000	15000000	4720000	14000000	12700000	6120000	1920000	1470000	918000	15300000	9650000	2540000	683000	5940000	12100000	7660000	10200000	6800000	6730000	762000	4850000	16700000
AALESVTSNVTSTLK	9450000	429000	45300000	15100000	33100000	70200000	74200000	66800000	43300000	403000	83200000	85200000	52500000	51100	34200000	47500000	40400000	33400000	50600000	35000000	66100000	48600000	5110000	62700000	61700000	56900000	7290000	46200000	28200000	34200000	54400000	24400000	14700000	84100000	859000	12000000
YGSGTGTNFSSLR	4140000	64700	2350000	3050000	5210000	210000	4050000	3000000	341000	1720000	282000	116000	120000	50400	1110000	5340000	212000	1980000	182000	NA	156000	1740000	6530000	9100000	1650000	114000	353000	7680000	4250000	2010000	8570000	NA	11800000	7140000	11900000	4060000
SDFVPELYVER	16000000	0	0	0	0	381000	30500000	259000	0	27100000	29500000	0	127000	21300000	0	148000	151000	31700000	22900000	27000000	23200	0	0	93900	63000000	0	0	0	0	120000	0	72700000	26200000	69900	6400000	0
QGWDPEIAK	151000	23800000	1290000	7820000	205000	11800000	14300000	939000	15000000	878000	852000	19400000	14800000	12700000	16600000	11100000	24100000	15800000	11400000	18500000	20900000	1350000	12400000	37200000	29700000	52800000	11500000	28600000	31800000	303000	57200000	44000000	93200	23200000	14000000	1910000
SQPTGSCVTR	5500000	636000	6950000	61300	642000	8550000	547000	522000	9150000	1930000	1050000	1430000	6990000	1040000	347000	3450000	762000	NA	653000	9360000	4150000	12100000	8110000	NA	570000	6350000	165000	6390000	694000	2150000	7860000	14300000	384000	9150000	23800000	1900000
GGATNSPAAVYAVSK	3120000	3060000	161000	4690000	5700000	3420000	8810000	7420000	498000	3250000	3210000	3540000	5640000	3970000	5070000	3600000	823000	2280000	3260000	4190000	2380000	2770000	2400000	5060000	3790000	3420000	2710000	6210000	3230000	3980000	6120000	4940000	406000	173000	528000	5050000
SDVGLTFIR	295000	59800	0	3680000	11700000	0	NA	11400000	0	1130000	7020000	415000	7130000	103000	0	331000	0	0	49600	171000	8650	7160000	2080000	5540000	5040000	0	49900	2840000	78100	374000	232000	20100	5770000	6030000	1790000	274000
LGGLVEFYR	864000	3750000	104000000	46800000	134000000	3600000	228000000	179000000	34500000	139000000	1820000	111000000	113000000	89100000	75100000	1440000	1450000	84400000	93700000	498000	1240000	132000000	1270000	108000000	3170000	6960000	3880000	211000	4110000	789000	1500000	5560000	958000	103000000	1810000	943000
VQWSPTGTNVPDYPK	19000000	1400000	34200000	19100000	19500000	27700000	65500000	5130000	32100000	32200000	36000000	2890000	1560000	832000	530000	27200000	37900000	25700000	4160000	32500000	23100000	31800000	17900000	38000000	27100000	44900000	13300000	2720000	23500000	26400000	39000000	30800000	18500000	28100000	16000000	25700000
NSESTSVNATNK	1320000	1510000	249000	175000	598000	768000	842000	723000	540000	141000	803000	516000	1620000	386000	897000	78300	449000	784000	1660000	126000	414000	228000	111000	347000	1060000	114000	0	337000	52400	178000	265000	111000	514000	118000	529000	96700
QAILDAGGVIR	NA	10300000	6660000	1560000	9620000	766000	17700000	18000000	1520000	19600000	21900000	21500000	16200000	18600000	587000	7010000	NA	571000	20700000	1300000	152000	6740000	3910000	NA	24400000	1050000	267000	4410000	1270000	350000	NA	NA	23800000	7710000	2670000	610000
AGTIINGLVK	3680000	5460000	671000	958000	3740000	595000	NA	3470000	329000	5470000	8220000	6180000	4330000	3820000	4780	3150000	0	365000	10100000	3060000	827000	8400000	2890000	9990000	6960000	47000	3610000	5740000	8110000	2170000	9070000	8870000	7590000	8620000	8780000	6080000
FGDEVLSK	15200000	10100000	5940000	3900000	2090000	11200000	4980000	3670000	7360000	6160000	3930000	7310000	2220000	2100000	792000	8180000	NA	15800000	12400000	4800000	13300000	11100000	4690000	4680000	6600000	7560000	NA	3440000	8770000	6520000	8630000	6920000	4830000	6310000	10200000	11500000
GTTALCAADAK	14300000	16400000	6990000	29600000	6670000	7520000	3860000	2800000	4630000	4720000	7770000	8080000	5280000	4740000	1020000	6080000	3190000	14900000	8550000	5160000	3660000	9320000	NA	9840000	9740000	3120000	14400000	7120000	7260000	5030000	6280000	7610000	2720000	3740000	15800000	10600000
GQVLEGIVK	7040000	18300000	21500000	15500000	18300000	868000	11600000	4330000	3200000	5660000	5990000	4820000	1060000	4010000	311000	17800000	801000	633000	8490000	4810000	1100000	8030000	4860000	5920000	6350000	416000	2400000	6640000	9070000	2200000	6610000	5110000	3490000	7870000	6850000	5700000
SGDITGGLPR	103000000	1180000	46300000	1460000	37900000	84800000	58400000	51600000	56300000	65500000	57200000	8220000	3240000	727000	1350000	756000	77600000	80600000	1090000	47100000	60800000	44800000	32600000	37600000	34000000	61400000	50600000	31600000	44500000	37100000	52500000	45200000	1990000	35500000	63400000	52900000
IVVFLNK	23800000	6640000	20200000	41800000	56900000	33000000	39100000	29700000	2070000	20400000	30000000	5310000	19400000	14400000	18500000	36100000	8130000	2390000	30300000	15700000	1300000	20400000	19600000	9700000	24100000	1090000	1590000	15700000	22200000	10000000	18500000	8880000	12300000	14000000	23100000	16500000
GEAGDNVGILLR	863000	8350000	466000	15300000	19800000	1660000	20400000	16900000	153000	11200000	2040000	696000	1060000	1030000	567000	24500000	30000	973000	3980000	1240000	1480000	NA	4390000	NA	21700000	0	2300000	13000000	12500000	823000	484000	1120000	14400000	27200000	NA	334000
SINEGFSGGEK	30100000	0	10500000	15600000	9880000	13100000	108000	11900000	12700000	9970000	11900000	197000	12000000	7960000	7680000	204000	48000	13500000	287000	4270000	585000	10700000	9180000	13900000	13600000	17800000	12200000	8270000	17800000	12300000	22900000	21200000	13400000	12200000	16300000	14500000
VVSPDIGGGFGNK	1300000	1120000	3830000	NA	3660000	588000	553000	1580000	242000	591000	1100000	786000	463000	243000	735000	466000	247000	826000	4560000	2690000	NA	4120000	3030000	3040000	848000	1180000	157000	5560000	1000000	1850000	2810000	5580000	4860000	97000	3570000	2030000
LLEENSNPTEEDVR	8930000	5670000	2080000	999000	2230000	3360000	3270000	3120000	2730000	39200	128000	2670000	3690000	2240000	2550000	1690000	6120000	7760000	12200000	12900000	10500000	8810000	3700000	7060000	9720000	7900000	7710	7580000	3400000	6970000	13200000	17700000	7690000	7990000	6130000	5830000
AGATYVSPFLGR	1350000	27000000	495000	3890000	42200000	978000	32800000	45300000	1470000	2110000	220000	951000	23700000	943000	318000	23500000	0	447000	1090000	140000	246000	6540000	5160000	9700000	14500000	650000	1430000	18500000	15400000	18400	12300000	1050000	16900000	11700000	9340000	4570000
LAVGDQVVSADR	3180000	209000	5510000	1260000	2350000	3970000	2670000	3250000	5240000	4880000	3860000	1500000	5430000	1930000	1160000	13700000	2110000	1390000	3480000	2950000	1750000	2970000	1800000	1770000	18100000	3060000	1730000	11200000	3920000	3060000	2140000	3160000	3140000	4310000	2790000	1830000
GPFVDSYVLK	9400000	357000	2000000	2990000	20200000	35000000	32100000	33400000	733000	33300000	35800000	671000	33000000	390000	521000	17700000	2560000	6830000	33300000	27000000	476000	26300000	16500000	23100000	25500000	170000	4640000	15400000	19900000	21100000	31600000	27800000	20900000	21700000	27000000	6990000
VVDLLAPYR	1140000	104000	9130000	217000	26600000	276000	34800000	789000	158000	301000	200000	65200	643000	0	93600	83000000	705000	61300000	477000	5080000	354000	140000	138000	294000	439000	491000	130000	770000	616000	141000	412000	2390000	57500	83800000	276000	155000
VIAPDVGGGFGSK	8580000	9540000	8880000	6340000	13600000	10800000	15300000	15500000	16600000	13600000	14400000	13300000	18100000	15900000	11500000	16300000	15800000	17800000	22900000	22700000	22500000	25800000	19600000	39600000	36500000	32300000	14000000	32000000	39500000	21700000	35700000	39900000	35200000	25800000	28800000	32200000
LAANIGDPAVR	14000000	11800000	12800000	NA	18600000	21600000	10600000	5730000	NA	24700000	NA	18300000	6190000	3770000	2100000	13000000	13300000	8110000	2830000	30100000	33800000	34200000	28600000	NA	41800000	61600000	4360000	28200000	46900000	26800000	62100000	48800000	44700000	36100000	35900000	46400000
LENATTGVNAER	13300000	13300000	23600000	6600000	19400000	8380000	20500000	23800000	16500000	4840000	3760000	5920000	12600000	9860000	8950000	15200000	8710000	8090000	3850000	9110000	9030000	9550000	4940000	6800000	10900000	4840000	3310000	9390000	10700000	6840000	7040000	8030000	5340000	6360000	13300000	7870000
VNDLGFIETPYR	214000	NA	500000	NA	7600000	388000	18000000	13400000	0	NA	8600000	980000	11700000	5070000	176000	10200000	0	0	NA	1740000	47400	1070000	NA	210000	NA	0	35400	9210000	214000	70800	764000	NA	1920000	7110000	2120000	490000
DAVNATATPILQGITR	5750000	310000	230000	1680000	541000	13900000	12500000	760000	9060000	8520000	45700	6050000	524000	901000	96600	260000	4630000	2990000	14700	444000	1760000	1010000	458000	160000	234000	1250000	197000	1030000	573000	754000	3090000	2520000	969000	84100	406000	261000
ENIQNATNGK	1070000	6830000	7140000	12300000	828000	5150000	1140000	1410000	11400000	2050000	NA	NA	2240000	2900000	760000	11900000	18800000	2270000	4900000	NA	3470000	7430000	4330000	313000	990000	NA	2240000	1930000	1480000	NA	13500000	1460000	789000	2410000	1930000	2760000
ASNGVIIITTK	1660000	27000	3930000	0	7280000	354000	11300000	10100000	78800	2620000	1520000	29100	56300	45900	0	243000	0	0	153000	0	0	4570000	132000	355000	2220000	0	0	582000	160000	0	449000	200000	1930000	3160000	329000	202000
GSEYTVDFLPK	1340000	2050000	495000	1670000	1260000	330000	1600000	547000	1910	2820000	NA	291000	968000	1380000	986000	NA	0	10300	NA	2000000	0	NA	3340000	10700000	28100000	0	701000	8990000	1820000	1890000	32400000	1930000	38200000	15900000	12300000	NA
VIDYIIPSNDDASK	6130000	10600000	3380000	8090000	2670000	5020000	4110000	4210000	3670000	55900	3660000	4270000	3960000	2270000	0	5530000	8300000	7310000	0	3430000	6800000	6360000	45500	10800000	8100000	8660000	3910000	5250000	6050000	4830000	9940000	5700000	3760000	7770000	0	7480000
SGESGLLQGLSGK	516000	1080000	1120000	NA	713000	1810000	4370000	2460000	1360000	4160000	1340000	716000	NA	2000000	852000	5280000	0	1470000	1780000	969000	675000	1030000	5400000	3940000	7970000	653000	5570000	1120000	10900000	2480000	12000000	NA	5540000	5340000	5820000	6760000
TSGVNITR	74800000	59500000	47900000	66300000	446000	35900000	35600000	1910000	44900000	34000000	51200000	53300000	3290000	39600000	36700000	66100000	544000	103000000	86800000	85500000	64900000	103000000	54700000	88700000	68600000	78400000	125000000	617000	137000000	90200000	105000000	109000000	67000000	89400000	132000000	114000000
LNDINPEDIASVTVIK	285000	35400000	41800000	12300000	20500000	25300000	49400000	40300000	1300000	18400000	17800000	31000000	47500000	19600000	1300000	35100000	725000	811000	50400000	58700000	56800000	83100000	6640000	45500000	69600000	1200000	13200000	58000000	63900000	562000	72600000	47600000	37600000	54100000	8460000	23000000
NNQTTFNQSNR	70700	24300	1240000	107000	89200	28200	0	0	124000	62400	0	0	0	0	0	0	37000	35200	0	1590000	0	862000	376000	0	1750000	0	56000	36500	1150000	386000	721000	886000	1220000	65900	3270000	1350000
ISSSYSSIDSNR	16800000	27500000	51600000	14900000	35800000	16900000	43300000	52000000	46900000	10100000	12400000	17600000	44500000	41100000	36400000	65400000	31500000	33600000	29800000	47100000	29500000	42100000	44400000	29000000	37100000	33200000	26400000	60300000	84700000	48700000	34300000	30800000	51400000	38900000	62700000	50000000
TSPDFDLR	15800000	1630000	20900000	20500000	15700000	17500000	32900000	23100000	23900000	14300000	20500000	28000000	22100000	16100000	1360000	78700000	73000000	29400000	49500000	37900000	209000	49000000	39600000	28500000	36100000	40100000	23700000	55200000	56000000	72800000	53600000	36400000	62100000	32200000	48900000	47700000
VNIDDEGVIK	907000	3850000	551000	2850000	251000	2850000	2520000	696000	750000	1630000	1030000	3100000	1410000	2010000	1920000	2920000	3170000	1920000	5840000	1750000	161000	3330000	NA	6780000	1950000	1150000	3700000	2020000	1820000	448000	2510000	1020000	3450000	1500000	2630000	6440000
IASSNGEQIEK	3170000	2150000	2570000	3940000	370000	773000	602000	1860000	990000	2620000	715000	1090000	1500000	649000	1280000	270000	4600000	600000	2030000	966000	1140000	311000	1540000	314000	3160000	583000	4030000	2260000	1170000	2680000	3610000	4890000	629000	1760000	4420000	3690000
SGLIDAAEFNNPTSDR	750000	216000	1620000	589000	2550000	492000	7450000	7550000	180000	402000	425000	995000	1720000	173000	120000	1670000	396000	1080000	278000	709000	442000	1060000	777000	1390000	3970000	1400000	22600	2040000	387000	2620000	5450000	5100000	2470000	482000	523000	420000
ISAEDAFFAK	2470000	14600000	10100000	3350000	13200000	1700000	29000000	17400000	1170000	15300000	14400000	18200000	31100000	23100000	3330000	3500000	96200	1820000	18900000	25800000	571000	17800000	12300000	26100000	27400000	881000	0	30100000	35100000	32100000	40500000	42900000	43400000	18400000	5150000	8840000
EGEIGNPTELSILR	0	32700	79600	0	10300	0	50100	17300	0	38600	126000	124000	29700	0	0	130000	0	45000	48000	37600	39300	88300	0	46900	45900	0	0	0	0	61500	0	0	0	83300	0	0
GPLADVNVR	16700000	39300000	15000000	72900000	11000000	9400000	37400000	15900000	4920000	14500000	8850000	11800000	27500000	15200000	12300000	8060000	16900000	13900000	24600000	23000000	26600000	26400000	9740000	27100000	NA	16800000	23300000	27400000	14000000	8820000	30000000	40900000	51600000	24500000	1160000	25700000
CPPGPYER	14500000	71400	2860000	580000	3490000	2040000	0	5180000	68000	511000	1180000	533000	193000	15200	326000	173000	236000	NA	75700	873000	NA	4170000	9330000	28400000	186000	502000	6990000	582000	20500000	1260000	5830000	5110000	251000	1520000	2900000	2590000
QGLFQEGWGK	1200000	1150000	1860000	1390000	621000	0	435000	374000	0	1350000	1390000	985000	826000	605000	14700	1780000	0	0	2260000	2130000	0	655000	2230000	10200000	1970000	0	0	543000	549000	338000	836000	0	481000	1180000	1360000	1300000
IAELAGVTDGK	21700000	15700000	5260000	10200000	3960000	6540000	9220000	10700000	10100000	17800000	19700000	17400000	10700000	10500000	13500000	7580000	23100000	29500000	32700000	12100000	38400000	13000000	21800000	68400000	51100000	74400000	15800000	4110000	38400000	4720000	32400000	26900000	19600000	7380000	16300000	15300000
SGFSANSQAK	11400000	33000	1790000	2820000	61500	2640000	141000	687000	774000	421000	162000	330000	20100	42600	77300	180000	1050000	7490000	119000	1670000	734000	3660000	4310000	2560000	3330000	1770000	2880000	190000	8450000	151000	4870000	6470000	111000	205000	12300000	6880000
VGATYEATDEK	6150000	6440000	147000	2080000	2090000	475000	3500000	3460000	422000	NA	1710000	6010000	2370000	1380000	397000	1510000	6360000	523000	6130000	1810000	447000	1090000	101000	NA	10400000	NA	1350000	1110000	2610000	1120000	3550000	791000	4610000	409000	302000	3310000
ADGSGVDLANVK	2600000	6850000	3570000	2390000	4410000	3830000	3600000	7030000	8090000	2800000	3730000	881000	278000	3900000	1760000	3190000	7370000	5600000	6520000	3030000	7870000	3240000	1350000	8460000	5930000	4920000	1340000	3990000	4150000	3720000	8870000	13000000	6010000	2750000	7290000	6150000
AVVESFSK	9260000	7560000	4090000	6670000	2890000	10900000	5670000	6640000	12300000	9520000	3940000	5340000	468000	942000	2880000	7820000	5520000	NA	13500000	7420000	6630000	8160000	9060000	20100000	11200000	8160000	9570000	9830000	8230000	10000000	15900000	6250000	11100000	10400000	16600000	20500000
VVSGENISNK	3280000	1230000	NA	1210000	4890000	1690000	NA	2750000	NA	3330000	2100000	3640000	4860000	5230000	2810000	6730000	3140000	977000	5330000	4080000	3130000	6330000	543000	208000	8080000	6310000	657000	5140000	NA	1490000	10500000	16600000	NA	763000	NA	NA
DASATSLYGAR	556000	667000	369000	82200	2980000	184000	3100000	3510000	NA	1550000	914000	2270000	1550000	698000	7760000	1020000	214000	3550000	9380000	2860000	378000	6050000	3150000	6070000	4190000	4160000	4070000	6780000	12500000	614000	9530000	15200000	12900000	7120000	475000	6180000
VFIIPVENAIR	804000	626000	33200000	1140000	1760000	59700000	1380000	168000	1790000	317000	2170000	303000	602000	1220000	1770000	4500000	4660000	30200000	2040000	1760000	280000	34800000	3960000	6000000	161000000	672000	732000	8610000	1420000	418000	872000	393000	190000000	40100000	4530000	35800000
VFVIPVESAVR	77300	494000	373000	187000	1140000	1170000	756000	396000	0	693000	76800	323000	1130000	178000	0	114000	0	164000	678000	459000	NA	843000	50500	243000	80700	24400	65200	280000	284000	356000	8970000	2070000	1040000	1670000	1930000	1240000
AVSQAQSVVER	1340000	1380000	1590000	615000	2170000	334000	1850000	3830000	739000	967000	1490000	3260000	2430000	2890000	2250000	2170000	2790000	64800	2350000	3730000	68500	3110000	1980000	3830000	4040000	1300000	0	2210000	3380000	1260000	3520000	6270000	4430000	2500000	336000	4560000
SNFSLATLPR	1030000	422000	79600	1250000	1200000	551000	1430000	2030000	0	341000	569000	440000	622000	338000	0	NA	0	0	3840000	454000	NA	2120000	155000	1850000	1310000	0	388000	1000000	310000	223000	583000	2000000	2680000	931000	1340000	424000
ALDSALAQIER	3930000	7430000	844000	207000	2400000	NA	5230000	1320000	73300	7110000	8800000	7180000	5760000	42800	199000	4830000	0	10500000	19000000	6830000	NA	8440000	1620000	10300000	8990000	0	1140000	3460000	3390000	2520000	6070000	8980000	5300000	4100000	5300000	5390000
AGVIDQVDATR	6530000	6610000	8700000	4300000	8420000	11700000	6380000	4530000	5120000	1670000	10300000	9800000	11100000	6860000	8300000	2070000	8610000	7890000	15600000	5870000	9030000	6880000	10100000	10200000	8890000	11600000	9340000	9430000	6750000	5630000	17500000	12900000	8590000	7480000	15000000	2860000
EIASAPGEVILPGEWEK	963000	2200000	3370000	1590000	707000	NA	7930000	4770000	509000	3680000	NA	3780000	21700000	NA	798000	2700000	28700	4100000	NA	5290000	NA	5080000	2800000	7600000	12200000	125000	525000	4220000	11600000	4630000	18600000	NA	2970000	7620000	893000	3090000
TYTLNVR	16600000	1230000	35900000	8930000	22900000	1020000	25700000	2710000	NA	5830000	1600000	8950000	2660000	290000	154000	2150000	452000	812000	8690000	14200000	NA	12000000	12300000	27300000	NA	NA	7770000	23900000	32000000	20600000	16400000	17700000	18700000	18900000	12700000	14300000
FGVADAAVER	204000	227000	349000	58900	1290000	2810000	65500	1760000	102000	3080000	NA	133000	5070000	13700	381000	2660000	NA	48200	22200	6120000	NA	2130000	1920000	106000	2840000	6320000	95400	382000	9290000	350000	23900000	39200000	13400000	2070000	230000	8140000
VNVNDARPASDG	2790000	1470000	599000	461000	1520000	1860000	601000	874000	1450000	1220000	1680000	1850000	2710000	2070000	2140000	832000	3130000	2310000	726000	2580000	2600000	1490000	919000	5760000	5640000	6880000	489000	2500000	3780000	1620000	11700000	23400000	8710000	804000	2790000	3690000
VSATDGLSVGTAAQNR	79900	876000	731000	0	1210000	638000	947000	1970000	1050000	458000	677000	2760000	3940000	0	0	34900	680000	490000	0	326000	674000	783000	89400	2930000	2990000	552000	0	2600000	1810000	411000	3830000	2510000	4790000	2050000	958000	93200
IFTFPTAGR	12400000	24700000	42400000	13300000	40500000	799000	73100000	65600000	566000	NA	21500000	642000	33700000	51000000	830000	36600000	0	979000	12200000	724000	5180000	20200000	21700000	40400000	30600000	NA	6910000	25500000	46300000	501000	33200000	27400000	40500000	21900000	19400000	NA
DYIDYLNAK	22800000	143000	108000	1100000	5560000	12900000	9560000	7150000	8280000	8390000	9920000	244000	746000	114000	33000	9200000	18000000	10000000	255000	7750000	728000	10300000	4020000	10300000	6760000	1280000	641000	6550000	7900000	8280000	14400000	241000	4000000	10700000	174000	9050000
AGEIQGQTR	55100000	35500000	23200000	17400000	57500000	31800000	29000000	40000000	47500000	39100000	44400000	34300000	43300000	187000	26000000	30900000	24800000	38100000	38800000	40200000	23300000	43200000	20400000	16800000	27300000	12100000	43200000	28900000	32300000	41600000	19800000	21500000	8540000	41100000	18800000	35000000
LITTDTTPVEQR	718000	149000	560000	105000	467000	123000	627000	419000	164000	192000	163000	46500	29100	0	0	51200	375000	41600	115000	2400	33500	57900	0	1700000	1740000	455000	0	646000	17800	603000	3730000	3850000	1610000	108000	1550000	668000
VETFTDAK	4960000	15900000	21800000	7200000	14800000	6420000	19000000	23500000	16900000	7410000	214000	6150000	12100000	13500000	8870000	15000000	9080000	3760000	2000000	4550000	1160000	984000	460000	3170000	3500000	704000	203000	6370000	5900000	8250000	4470000	4840000	1850000	4310000	1210000	326000
NQINGANSIDELR	12200000	17600000	22400000	5330000	13300000	10000000	23300000	25200000	14300000	8220000	6870000	9060000	789000	8780000	7220000	8500000	8430000	4540000	3830000	6220000	4300000	5210000	1680000	6120000	7450000	2330000	867000	9000000	4110000	8770000	4940000	2600000	2350000	7790000	3560000	4660000
GLLNFNTSEDELATR	584000	7580000	6550000	1110000	784000	3700000	9750000	1610000	0	234000	3670000	4650000	7270000	3680000	2860000	1680000	0	188000	697000	3870000	840000	1300000	703000	4310000	3590000	0	813000	3230000	650000	751000	1540000	3570000	2370	735000	862000	283000
VSDNVNIR	22300000	8690000	24400000	11500000	33600000	13700000	25400000	2240000	29500000	NA	4270000	17900000	3110000	1340000	77300	2790000	2300000	13800000	4970000	1770000	NA	2730000	3470000	9430000	1520000	4390000	6430000	862000	4700000	11500000	3510000	3060000	3680000	10500000	1650000	3730000
FFANAIDTETK	4210000	13300000	15700000	4910000	8780000	4750000	2550000	1390000	5730000	5790000	4860000	2030000	7760000	2160000	5450000	9950000	731000	1530000	1350000	3130000	4570000	3880000	575000	NA	4550000	5290000	2150000	7280000	1600000	7990000	3080000	940000	649000	6100000	2350000	4310000
ESYFLETATPR	11500000	26400000	21300000	7950000	1410000	512000	30500000	26000000	408000	12500000	11600000	15500000	17000000	11500000	30300	18500000	711000	740000	147000	547000	303000	5030000	887000	8270000	12700000	363000	1410000	1660000	1660000	12900000	7310000	2150000	1880000	12900000	651000	1240000
EGDVIEVR	22500000	27200000	641000	34900000	8750000	11600000	16600000	12200000	15000000	7780000	17300000	10700000	1230000	1170000	189000	16800000	NA	24400000	25200000	7980000	16600000	16300000	14400000	11400000	19100000	23500000	17300000	575000	15600000	16500000	22000000	17800000	16900000	16100000	29500000	20100000
TLEQDAFTFR	138000	13900	0	15600	4670	118000	1370000	1710000	0	101000	0	0	618000	63700	0	326000	0	0	0	38700	0	5280000	0	6800000	4830000	0	24700	831000	2700000	38800	4780000	6940	0	0	1370000	484000
GTLNVAAVK	982000	4140000	3380000	1900000	2720000	1130000	4450000	2880000	1240000	1710000	925000	2470000	4400000	953000	3580000	4340000	2030000	2580000	1610000	1140000	1150000	5810000	6460000	11900000	914000	10300000	9680000	7690000	1260000	6460000	16300000	27100000	4420000	7610000	1330000	4500000
AAVEEGVVPGGGVALVR	83400000	1990000	49100000	54000000	42900000	91200000	68300000	60500000	48200000	64500000	66000000	5140000	48500000	2810000	892000	1090000	92700000	65200000	638000	48900000	302000	48300000	30200000	77000000	77900000	185000000	55700000	36100000	59300000	35300000	86600000	91700000	32500000	55200000	38900000	42800000
SIDSMIPIGR	51400000	2380000	39200000	32300000	25800000	61000000	NA	44300000	7770000	NA	3940000	2680000	3810000	5950000	9270000	18900000	41500000	6080000	50100000	15600000	35500000	43700000	23300000	36900000	4650000	38500000	22600000	32300000	33200000	32900000	45900000	48800000	23300000	7990000	36500000	40800000
LLEQEGTEIR	2890000	5650000	4650000	5650000	6300000	6270000	7770000	5270000	2480000	4310000	6840000	6470000	8520000	499000	4460000	6240000	5760000	8530000	12500000	3030000	6320000	3110000	8780000	2560000	7530000	9210000	4580000	3800000	10100000	4300000	10800000	11600000	3700000	8230000	11500000	13400000
GTTNGTETNFDGK	2550000	442000	2680000	893000	1260000	189000	3150000	3900000	2430000	396000	1280000	2010000	1930000	983000	395000	1660000	684000	774000	248000	301000	676000	724000	545000	685000	652000	495000	525000	1920000	1580000	224000	736000	1120000	136000	1080000	1400000	555000
LGSQEFPELLNNTPSVYATK	41000	233000	4270000	428000	61800	3670000	156000	239000	451000	351000	247000	333000	674000	47200	44800	109000	0	1220000	101000	1530000	173000	1550000	149000	877000	181000	0	149000	131000	994000	347000	3000000	341000	0	3200000	489000	232000
SGGGFGDAR	NA	590000	3600000	14200000	24100000	7390000	1900000	2500000	7260000	NA	2370000	463000	870000	1500000	882000	3920000	1920000	11900000	3220000	5860000	6580000	1590000	1730000	NA	5440000	NA	4940000	1510000	2660000	2120000	607000	NA	2320000	10200000	4380000	3860000
ALDPNNDYATVVNK	152000	5040000	7920000	219000	2470000	810000	3720000	4460000	1770000	787000	654000	68800	1790000	1190000	1760000	2870000	1220000	1070000	427000	819000	151000	145000	269000	1320000	124000	134000	63400	2480000	1640000	2320000	583000	474000	149000	1670000	336000	45800
VEVLDTQLSSPDSEAVR	1630000	204000	566000	378000	1290000	788000	534000	2890000	1300000	2250000	599000	1210000	750000	0	160000	549000	NA	355000	483000	7070000	720000	3310000	1140000	NA	1160000	472000	363000	3880000	4600000	4030000	6080000	8560000	2460000	3600000	2090000	4380000
IPVIQGEVEK	502000	818000	479000	583000	316000	1220000	47100	521000	1400000	219000	556000	308000	309000	21600	0	262000	1190000	581000	233000	291000	1650000	223000	10400	145000	323000	645000	871000	193000	1540000	486000	952000	1870000	425000	1900000	2120000	1560000
GISYSTSEIQR	1690000	2770000	1760000	1690000	2800000	629000	1900000	1230000	2180000	347000	1950000	891000	4170000	1060000	3230000	1860000	2500000	1520000	3300000	3060000	1060000	4150000	1950000	3790000	5280000	NA	3110000	3990000	3650000	4040000	7130000	3830000	13700000	2660000	3970000	3680000
SAATDNVGDGK	1290000	5680000	1240000	1470000	355000	909000	4160000	5140000	469000	1130000	35200000	2110000	1540000	2220000	6030000	717000	1270000	2720000	26400000	150000	1120000	1030000	368000	15000000	371000	1190000	9520000	2840000	NA	310000	NA	NA	2950000	574000	1660000	NA
GFASFANTR	1500000	204000	1250000	629000	558000	16900000	26300000	26000000	18400000	6940000	17300000	19400000	25500000	23700000	17900000	29200000	101000	21100000	28800000	52900	5410	21600000	2430000	19400000	20300000	80900	4990000	7990000	12400000	10300000	14200000	312000	11600000	7980000	13600000	22600000
LVLPGELAK	410000000	375000000	213000000	210000000	274000000	623000000	296000000	294000000	197000000	436000000	416000	286000000	193000000	1670000	1900000	197000000	1230000	275000000	218000000	211000000	220000000	157000000	116000000	171000000	191000000	160000000	124000000	171000000	153000000	262000000	246000000	201000000	819000	207000000	135000000	199000000
HAVSEGTK	11600000	59900	309000	NA	422000	11200	4680	NA	370000	88800	4250000	208000	548000	346000	13500	94900	209000	1400000	57000	11800	197000	NA	13900	NA	2250000	138000	80400	131000	351000	514000	42000	NA	37900000	44700	4440000	27900
AVSVLQYDTNR	1540000	2300000	1660000	1690000	2450000	5330000	13000000	6090000	2180000	3210000	6540000	3910000	4080000	1610000	2950000	622000	8700000	1030000	2620000	2770000	1810000	1090000	3560000	1910000	2460000	7850000	1120000	1410000	2740000	1860000	2960000	3660000	2520000	388000	2000000	202000
TAAQYEGDAAR	8760000	6130000	7550000	606000	1480000	6500000	281000	4710000	NA	6490000	NA	4520000	6110000	2380000	331000	877000	2280000	707000	3210000	566000	2840000	3240000	2310000	1560000	1100000	2660000	2150000	727000	3010000	5480000	3640000	4890000	1370000	2980000	3510000	2040000
VSAFAGEYNPIAAQDSIR	0	527000	34100	0	0	0	148000	109000	0	30500	21300	130000	446000	0	0	0	0	47800	354000	0	0	38000	10500	817000	1510000	1060000	0	456000	0	60100	1210000	474000	42400	207000	7640	29000
INSADVGVDGPTSR	1070000	0	2290000	300000	2310000	1070000	3830000	2930000	1700000	531000	785000	92700	38200	0	0	3030000	3510000	1410000	1400000	2810000	2200000	2880000	907000	3330000	3020000	3330000	1190000	1600000	2360000	86300	1570000	1630000	1460000	1410000	2080000	3240000
ALEAALGQIER	2010000	4820000	1340000	277000	2090000	NA	4250000	2520000	763000	2680000	0	5010000	1960000	126000	54500	2990000	169000	46800	8670000	2400000	265000	2080000	657000	3870000	4440000	832000	62400	577000	678000	40300	1950000	1020000	1890000	1160000	2150000	2140000
TPGPGAQSALR	20300000	77700000	6760000	69200000	31100000	37800000	94800000	143000	33500000	28000000	139000000	120000000	99000000	26000000	22000000	51500000	625000	47500000	118000000	67900000	74100000	73000000	4160	42400	62500000	19200000	25100000	1170000	42300000	13800000	23500000	12500000	37700000	12700000	30700000	50700000
DNSAVWAISK	21500000	15000000	1680000	8260000	9600000	23400000	18500000	8600000	15100000	18600000	20800000	38700000	9620000	8280000	11500000	26500000	44000000	28000000	36600000	26100000	22000000	23200000	8100000	14800000	13200000	848000	15600000	3600000	20400000	2550000	15800000	18600000	1150000	533000	23600000	22200000
ALDSALEAVTGSLK	0	40100000	148000	0	10400000	576000	42900000	24800000	35700000	47300000	42700000	35800000	25300000	7440000	0	22800000	0	12900000	54700000	0	29600	0	683000	1790000	29500000	0	0	3980000	0	63700	33500	81200	41000	5350000	1790000	0
AANVPSFK	384000000	50300000	990000	992000	54000000	200000000	71400000	689000	36300000	289000	78700000	67900000	541000	28100000	26600000	43800000	322000	163000000	160000000	516000	50900000	32400000	912000	57800000	41600000	52600000	35600000	22300000	42200000	2620000	61900000	92500000	71800000	849000	72400000	63800000
VDVDSNPNSAAK	6120000	2790000	357000	2450000	24600	3860000	1480000	1850000	1160000	2350000	0	1580000	1280000	0	20000	124000	2650000	3850000	5080000	2180000	1120000	1680000	1500000	2980000	3730000	2000000	1800000	887000	1730000	3490000	3090000	4590000	1900000	1690000	5510000	93500
ALQAVLPAATDFPYTVR	28100	23900000	7990000	43300	15800000	14100000	12700000	15800000	296000	12100000	22500000	367000	20900000	5790000	41600	16900000	42600	405000	30000000	330000	157000	29500000	885000	23300000	34200000	0	29000	9720000	9620000	0	1440000	13800000	4960000	20300000	101000	3070000
QLAFTSPTSNSGFK	2310000	48400000	NA	NA	13500000	854000	29000000	1710000	3490000	4510000	2550000	469000	239000	7210000	4220000	11100000	2630000	5850000	1580000	11400000	5230000	NA	5940000	473000	5560000	NA	7170000	455000	NA	NA	3600000	NA	17100000	2790000	1180000	2790000
DATPLEADLPR	1550000	48100	620000	254000	1160000	3030000	1680000	3260000	652000	1830000	92400	93100	7880	0	72600	1160000	NA	5420000	124000	5180000	24400	1590000	1510000	4850000	97100	105000	74500	1890000	2310000	1240000	836000	7920000	1140000	1910000	2750000	5240000
DANVIAQDTR	15300000	15800000	14800000	12400000	30300000	19500000	24800000	36600000	25700000	23100000	13900000	24800000	29900000	22000000	24000000	40000000	33900000	35400000	31500000	41200000	38800000	41700000	20700000	19800000	21200000	19800000	14400000	13200000	65500000	26600000	24900000	26200000	23600000	16900000	47100000	39100000
LVEYEGGGDESR	18000000	16100000	11300000	12000000	10400000	13600000	12800000	12800000	10200000	11300000	16100000	11600000	10200000	6700000	8890000	10100000	15300000	14900000	19200000	11600000	15400000	10900000	6700000	15600000	15000000	17200000	7720000	9430000	7980000	12400000	15100000	10500000	8120000	9890000	15400000	15700000
VVTINDGSPGER	33800000	26600000	18300000	15800000	22100000	22600000	28900000	28400000	25300000	29100000	32400000	22800000	186000	12800000	12200000	11200000	26900000	23600000	19900000	15700000	22700000	14900000	11900000	25600000	21200000	27400000	11700000	9980000	13600000	11000000	20200000	20600000	12900000	14700000	24100000	20500000
ELAFLNSGVR	537000	1010000	2990000	311000	3830000	221000	3380000	2860000	0	1370000	1370000	223000	3180000	1130000	0	2060000	0	0	1590000	71800	5970	2400000	1150000	2510000	4870000	0	743000	3020000	412000	114000	2350000	4280000	1650000	1900000	602000	2110000
TAIPSYNVAR	9640000	5570000	3950000	5230000	2820000	7170000	740000	6070000	NA	5730000	6000000	4210000	10700000	1090000	1580000	10500000	17400000	1870000	2180000	23000000	21300000	29500000	35100000	NA	31500000	73500000	17800000	55500000	64300000	60300000	82000000	99700000	NA	59500000	73800000	64800000
TDAINLLTNGNAAQK	9190	396000	69200	0	0	35200	528000	577000	26700	534000	32700	459000	614000	27000	0	44600	51200	127000	1690000	1470000	0	1640000	0	4750	2820000	NA	214000	4760000	4520000	4000000	130000	8570000	2780000	5190	5080000	3500000
ALIQDIGAK	2530000	9760000	3290000	3410000	1310000	4080000	2770000	2080000	917000	6730000	12600000	10500000	5910000	1660000	2440000	6900000	NA	7590000	16400000	8730000	4810000	8230000	4420000	9430000	8840000	6670000	1350000	5050000	13500000	3840000	10600000	19900000	7870000	7200000	7720000	5150000
LILVTAINPTPAGEGK	226000	9230000	2290000	865000	6250000	14100000	10000000	9480000	5330000	12300000	14500000	934000	361000	651000	221000	4350000	387000	12600000	18700000	14900000	15500000	12100000	4920000	16400000	33200000	19300000	292000	7530000	8480000	4380000	25600000	22600000	12400000	9230000	2780000	6170000
TQYSFSTDPNLR	1070000	1930000	133000	0	1800000	121000	1100000	1810000	0	122000	3090000	2510000	4000000	1990000	2320000	538000	117000	95600	3550000	NA	33600	1300000	157000	1240000	5390000	4040	0	1560000	549000	1140000	61100	8160000	4580000	507000	0	2470000
NSESTSVNADNK	20000000	17600000	5020000	6690000	5130000	7640000	11300000	7470000	9630000	4870000	5230000	7500000	10100000	5000000	4760000	1980000	2140000	7110000	2840000	6320000	2970000	3110000	2740000	11000000	11500000	3470000	669000	5870000	4020000	9530000	11400000	14400000	8420000	3330000	7330000	3130000
AAVEEGIVPGGGVSIVR	5860000	4370000	6260000	2160000	3100000	7540000	4840000	7560000	8540000	1960000	9390000	12800000	14300000	8590000	9500000	12100000	52200000	35800000	37400000	35200000	63000000	74700000	39100000	144000000	110000000	182000000	38500000	57800000	98300000	51600000	162000000	237000000	79700000	103000000	70100000	112000000
VNLLPAAPGTGVIAGGAVR	95000	13200000	8210000	5200000	9340000	470000	6290000	5790000	9740000	8620000	9480000	10700000	12100000	8850000	5530000	7400000	10400000	9980000	14000000	5810000	12000000	11800000	3660000	13000000	14900000	12400000	0	8090000	5930000	193000	15000000	7480000	5340000	10200000	1840000	3800000
IGETGPTIDEDIQTK	1710000	1700000	741000	668000	382000	594000	584000	413000	125000	463000	9880000	454000	161000	489000	580000	1750000	602000	219000	4110000	230000	73500	1100000	901000	1600000	375000	235000	224000	725000	566000	588000	888000	1760000	1390000	1230000	1110000	764000
TGQVLEVQGSK	18200000	9240000	11500000	3590000	11600000	12900000	13000000	12500000	21900000	7190000	9060000	8890000	9360000	1890000	1170000	5580000	17400000	10400000	7540000	13100000	13300000	5480000	3430000	6110000	8490000	10200000	2070000	5400000	6890000	5320000	9310000	15200000	5500000	2450000	5170000	4980000
DFYGFAYK	6130000	25200000	18200000	13700000	1300000	860000	32100000	NA	0	NA	10900000	NA	13200000	19500000	93900	NA	0	0	NA	NA	0	NA	11900000	27200000	18500000	0	1990000	NA	26900000	15600000	24500000	21700000	19000000	1380000	476000	14700000
QASFIPAFFPK	237000	37900000	166000	1160000	674000	756000	5010000	650000	816000	1430000	31400000	1930000	8100000	646000	387000	46800000	501000	813000	26700000	1510000	725000	492000	102000	976000	7690000	0	810000	587000	681000	1640000	7750000	15200000	1070000	495000	405000	757000
GIAASLLEQR	515000	635000	431000	349000	1340000	448000	4070000	694000	0	1850000	1530000	209000	544000	82300	0	117000	0	25000	24000	873000	250000	1610000	118000	3770000	324000	0	78700	172000	761000	184000	2620000	NA	357000	1670000	71400	234000
QAIIDAGGVVR	6560000	9980000	5090000	1010000	13800000	72500	29600000	9630000	64000	17200000	25000000	20400000	26400000	20900000	100000	4190000	177000	134000	19900000	NA	92100	12700000	6420000	45500000	39100000	21700	756000	9490000	NA	46900	40600000	NA	37000000	11000000	8780000	7790000
SVGDSPVPVDVISADELGR	84600	236000	540000	245000	231000	679000	158000	216000	0	739000	123000	100000	52700	238000	0	149000	305000	925000	356000	358000	436000	1280000	166000	1940000	253000	165000	42400	149000	2380000	882000	2110000	882000	5120	4740000	479000	566000
INLDTSNPAPR	74100000	51900000	21800000	24200000	30900000	47700000	47900000	45300000	37800000	62000000	57100000	53100000	52900000	43200000	39100000	18200000	59000000	74400000	42300000	59000000	52500000	37200000	44600000	120000000	117000000	136000000	23900000	66100000	58600000	74000000	143000000	201000000	99400000	58300000	51000000	50200000
ETFDNWGK	1110000	1400000	3690000	865000	528000	11100000	6150000	572000	4950000	1730000	1850000	1740000	2010000	2400000	1890000	865000	1670000	1190000	2930000	5260000	323000	5320000	3550000	11300000	1200000	812000	5610000	762000	12800000	8120000	14300000	15400000	7590000	1180000	4710000	4510000
ALQLYEPGLR	3760000	7720000	NA	5730000	10100000	1840000	7100000	9270000	2300000	13700000	15600000	NA	11900000	11800000	167000	NA	16300	3850000	19300000	NA	176000	21800000	8530000	19500000	16100000	748000	8930000	15300000	18300000	11500000	22000000	23100000	16200000	14300000	18600000	13800000
NAVVVPDTDEGLDK	1750000	731000	313000	805000	2330000	195000	1440000	1930000	986000	2290000	1180000	539000	672000	123000	129000	866000	168000	4110000	1370000	3130000	187000	1200000	463000	1860000	1230000	390000	1050000	1140000	2520000	1110000	950000	2190000	677000	963000	2900000	4710000
GGNQIQAALR	44900000	81800000	80000000	2460000	38500000	37400000	76700000	65400000	66300000	34900000	34600000	43000000	53300000	48700000	45400000	114000000	2310000	69300000	577000	90700000	81500000	1150000	1970000	1390000	2030000	97700000	68000000	92200000	137000000	125000000	121000000	144000	95000000	337000	146000000	105000000
LLLQNQGDAK	11400000	11800000	572000	13300000	7080000	1040000	7380000	7000000	1070000	5760000	1790000	4820000	5650000	4030000	796000	5510000	1340000	1150000	3210000	5410000	NA	5340000	3360000	4640000	NA	1400000	3010000	7130000	740000	NA	8410000	8110000	3090000	5750000	5790000	6240000
WNDGSDFTAEDVAR	2040000	62300	3930000	1080000	1220000	85100	5050000	4520000	2700000	1220000	163000	1500000	2220000	0	1630000	13100000	3720000	418000	193000	639000	67100	4010000	235000	3240000	3110000	69200	1070000	2820000	7040000	4250000	4410000	4810000	2340000	4830000	4350000	3190000
VLVVGNPANTNSLIAQR	4660000	338000	2670000	250000	5030000	9260000	7110000	324000	4020000	2310000	370000	316000	225000	30500	199000	494000	5730000	4200000	489000	1290000	1770000	244000	111000	4960000	4750000	3140000	661000	542000	986000	468000	4400000	4380000	3050000	557000	365000	815000
EAEAAFGNGEGYLER	397000	251000	384000	441000	NA	159000	1070000	2090000	478000	1920000	245000	223000	415000	363000	94700	734000	853000	282000	1490000	1050000	625000	480000	787000	975000	2210000	871000	132000	3530000	1170000	699000	358000	2030000	1870000	217000	1110000	945000
AVQTGQVPIGER	24800000	25800000	12100000	9560000	12900000	19000000	18900000	17700000	11500000	13700000	17900000	11800000	15900000	15300000	13000000	9430000	16900000	15800000	15200000	9490000	13500000	9130000	8380000	27000000	24600000	25700000	8760000	13400000	11800000	18600000	26300000	28000000	14200000	14700000	12300000	14000000
AADETGAACAAK	4630000	1990000	759000	0	2140000	1570000	1670000	1960000	2190000	855000	81900	2770000	3880000	953000	1320000	86000	152000	3990000	1530000	2300000	1230000	1410000	936000	4140000	3940000	2140000	196000	1570000	1650000	1180000	2060000	7460000	2270000	944000	2300000	2280000
FESLPADLQK	9840000	6710000	9390000	6960000	5950000	6730000	10800000	15600000	12900000	4850000	7910000	214000	5360000	831000	170000	3440000	8540000	9050000	3070000	5230000	5200000	3500000	4220000	13000000	1590000	NA	1580000	3010000	254000	12600000	8040000	9470000	2210000	2260000	6170000	5560000
GIDGQALIDEAR	4820000	147000	3020000	3460000	2090000	78700	662000	4380000	NA	3530000	NA	3550000	112000	0	2520000	1760000	6670	61700	5340000	NA	340000	NA	805000	11800000	4580000	5580000	477000	1930000	173000	3410000	13100000	8210000	2030000	1740000	1690000	382000
SFASQADEAK	1450000	1870000	1470000	537000	1890000	2820000	2030000	1010000	2770000	2190000	NA	1610000	821000	463000	193000	1000000	473000	4760000	4030000	389000	3140000	3050000	378000	1360000	2260000	1520000	1000000	1700000	495000	491000	7030000	5520000	5270000	382000	2790000	1310000
LTLAPDWK	10100000	11800000	8860000	3460000	13800000	1820000	16300000	13300000	46300	13200000	26800000	19100000	1450000	16900000	1090000	17800000	64200	74500	29900000	5710000	NA	30300000	14900000	31800000	27300000	0	4470000	5060000	14500000	2960000	16000000	33200000	30100000	7800000	18900000	25000000
VTNGTPGTTPVVNTAGVAGGDVFAR	3970000	22000000	14000000	437000	134000	18900000	98100	35000	22300000	150000	28300000	79400	24400000	0	18400000	75300	10800000	11400000	19600000	9910000	13100000	15400000	3690000	10800000	6430000	5500000	2100000	26200	7250000	1760000	4490000	2060000	102000	90200	119000	8500000
DFGYSFPCDGPGR	5070000	365000	20500000	7110000	29900000	7870000	22700000	24500000	33400000	10300000	13700000	557000	248000	132000	13100000	1370000	256000	11400000	329000	10700000	6470000	16600000	7860000	5580000	654000	229000	73400	29100000	17400000	10100000	3210000	5180000	1200000	24400000	4820000	10400000
TPLANLIR	661000	119000	1040000	918000	1890000	102000	3880000	11300000	1570000	1410000	19600000	25200000	10300000	2270000	5340000	27800000	577000	703000	56900000	36500000	360000	41100000	1200000	18400000	27300000	95900	1960000	21500000	55100000	7170000	985000	1260000	27900000	28300000	67500	47000000
IIVDTYGGK	19800000	1890000	9710000	13300000	6390000	17200000	13100000	6410000	7370000	13300000	12100000	11900000	9060000	1660000	4950000	5490000	11100000	11100000	12100000	3470000	10500000	12800000	9340000	9480000	9920000	15600000	8300000	10100000	12500000	6020000	11000000	15200000	9910000	10700000	11500000	9390000
GPLTTPVGGGFR	18900000	42500000	42700000	30200000	48000000	1100000	35400000	38800000	1760000	13800000	12200000	14600000	27200000	27000000	217000	52500000	1750000	967000	13500000	16800000	2160000	19400000	16000000	NA	16200000	791000	1400000	14800000	NA	2130000	NA	14400000	24500000	14200000	21800000	8230000
TLQDYNIQK	7080000	3130000	4110000	2610000	7240000	4900000	8700000	9170000	9680000	3250000	5600000	7950000	675000	6520000	5870000	7290000	3620000	4740000	4910000	4930000	1770000	5270000	2250000	3860000	4730000	1110000	570000	2900000	3830000	2170000	3130000	1500000	1300000	2660000	1510000	3060000
GTPGDSALPVQILDR	71200000	107000000	92400000	29100000	63400000	83000000	136000000	121000000	145000	0	69900000	0	426000	130000	176000	1350000	974000	43100000	90400000	55700000	21800	63000000	29000000	3440000	3120000	0	0	13800	0	10600000	24900000	33600000	20100000	2720000	25400000	30700000
GYLSPYFITNADK	28600	1780000	246000	1430	2410000	0	3180000	2070000	0	121000	1390000	497000	294000	2040000	88500	319000	0	0	2670000	259000	0	209000	0	521000	2060000	0	0	59500	0	0	75300	26200	248000	292000	181000	108000
TVGSGVVSK	71500000	33300000	17000000	37700000	39200000	53700000	43600000	38900000	34500000	36300000	48100000	42100000	45200000	32600000	27600000	27000000	72500000	79100000	65400000	49600000	41600000	35800000	34500000	64200000	68200000	78100000	50300000	32300000	42800000	41500000	76900000	90900000	43600000	28500000	84300000	57500000
GPFVDGYLLK	0	1330000	20800	0	9500000	29400	13900000	10200000	18000	12300000	9200000	640000	1370000	607000	168000	NA	4500000	0	1680000	20200	0	14200000	5890000	4740000	12600000	0	0	7460000	0	0	NA	0	5830000	11800000	0	0
AINVNDSVTK	4730000	6870000	3750000	7560000	12100000	7370000	7630000	6580000	7910000	5540000	17800000	14900000	14800000	9220000	6960000	15200000	13500000	13500000	39200000	22000000	30500000	10400000	6850000	11200000	7370000	12200000	21600000	8280000	14300000	6700000	7990000	6530000	3770000	8460000	10700000	10500000
VIVLGSGPNR	7370000	21900000	4460000	14900000	12400000	1410000	1790000	3760000	989000	2360000	13000000	8900000	2530000	11100000	1520000	15700000	1580000	2090000	19800000	831000	1900000	17800000	13200000	1330000	2640000	182000	3000000	13400000	2590000	3700000	16200000	11700000	11700000	15200000	2150000	3930000
VIIVGNCGQDPETR	1400000	9100000	2790000	3090000	5140000	7610000	4020000	2620000	3150000	4210000	6060000	5190000	5690000	2660000	3130000	900000	794000	9140000	8400000	6820000	3680000	3970000	5470000	9400000	7150000	5540000	3130000	3310000	8240000	1240000	3600000	7260000	6230000	2870000	8540000	9960000
ATYENYEDGTNTILR	0	932000	0	0	258000	33300	735000	624000	133000	378000	21600	2060000	885000	945000	428000	1560000	289000	962000	693000	858000	1000000	196000	568000	4640000	1200000	3490000	356000	1270000	359000	1410000	6300000	6410000	789000	1020000	585000	1670000
ESVAGDLPDVTFQGLNR	149000	194000	344000	198000	289000	420000	1480000	1520000	500000	946000	1520000	182000	349000	31800	233000	807000	340000	881000	109000	6710000	14200000	5020000	118000	14700000	20400000	3620000	8700	3450000	2310000	57000	42800000	48900000	7410000	3160000	99100	5050000
LSSGQPGTASIIR	221000	4080000	85500	0	397000	622000	309000	356000	288000	66500	6810000	1420000	5810000	5130000	4420000	7070000	0	0	22700000	14400000	447000	635000	1260000	1500000	8810000	986000	262000	8570000	1980000	831000	20400000	439000	1720000	2950000	2050000	23500000
AFEEITGIK	12200000	18700000	10500000	11500000	13700000	1750000	30800000	22800000	865000	8780000	13400000	8970000	8940000	9820000	153000	13600000	NA	1450000	6490000	NA	2010000	10400000	NA	15800000	11000000	474000	3530000	NA	19600000	19500000	12500000	8630000	16500000	12300000	11700000	14600000
LVITPTDGSLLADGSDHYEVLIPK	0	272000	557000	0	377000	0	254000	6640000	0	43600	330000	242000	332000	265000	0	647000	0	0	498000	0	0	72400	28500	243000	180000	0	0	148000	0	0	0	0	0	57100	0	0
CETACPTDFISVR	0	1260000	35900	161000	118000	0	6260000	3030000	0	2850000	50200	6660000	5060000	4170000	0	758000	0	0	1620000	0	28400	41300	0	614000	653000	0	0	72200	116000	0	105000	569000	184000	1070000	100000	128000
AQLDETVSTAR	6550000	2760000	1850000	658000	1970000	712000	1380000	1310000	277000	1720000	1590000	2430000	2970000	740000	2120000	888000	794000	937000	2130000	393000	397000	473000	290000	2270000	2550000	364000	79700	985000	649000	341000	531000	684000	887000	289000	1150000	1210000
QAFLTFGDK	165000	592	111000	544000	66500	78800	3560000	NA	0	604000	553000	26400	84800	44100	0	154000	0	0	NA	62800	0	16000000	4250000	3990000	6040000	0	77300	9880000	NA	112000	7250000	2800000	4490000	20600000	9330000	8130000
VFVDNYAADGTK	8290000	57900	2380000	534000	5190000	5490000	5930000	3330000	5440000	3380000	3970000	245000	130000	1550000	2140000	359000	23100000	32000000	326000	31200000	22800000	21000000	3420000	7880000	113000	9170000	13800000	4550000	31200000	3720000	5630000	10400000	5260000	3920000	19900000	39700000
AINLNDLK	10500000	15000000	6020000	11900000	837000	1130000	6620000	6730000	369000	10600000	12900000	9510000	5270000	914000	1040000	9240000	2460000	870000	13700000	NA	373000	NA	7450000	12700000	1080000	908000	2770000	1590000	4930000	6090000	8760000	6930000	4130000	13900000	8680000	12100000
VNVYGGGVTGQAEAIR	846000	271000	11900000	194000	170000	1520000	NA	765000	NA	413000	NA	312000	11100000	0	665	59500	1100000	2240000	5110000	2990000	981000	4940000	1650000	3810000	NA	137000	815000	3860000	NA	1590000	656000	NA	213000	142000	NA	193000
EALAVAEANK	10700000	12400000	4410000	9190000	5980000	1970000	7150000	7570000	NA	5400000	8480000	7230000	8120000	1310000	653000	12200000	4090000	11300000	14600000	5110000	1320000	4890000	6300000	4660000	NA	3450000	1470000	4940000	3320000	8510000	2230000	5050000	8270000	5030000	13300000	5400000
FGAEDLAALK	2640000	11100000	3130000	8790000	6960000	412000	9780000	4620000	NA	11500000	11300000	4660000	2660000	991000	3480000	8500000	292000	1390000	18500000	NA	683000	10500000	NA	12700000	18400000	212000	6300000	7980000	9090000	6520000	NA	13200000	14600000	9760000	18300000	16800000
AGSSISDLPR	116000000	1760000	46400000	43700000	42700000	63100000	76400000	63500000	51700000	54200000	50200000	823000	45300000	458000	1690000	33500000	72500000	63300000	64500000	40200000	39700000	30000000	23800000	46100000	35600000	36200000	21800000	3420000	26200000	3790000	36200000	38800000	2240000	10000000	47200000	1560000
GQVSWTPTDNTEVR	34400000	29200000	22200000	7030000	14300000	21900000	21700000	17400000	14300000	15600000	18000000	12900000	21000000	247000	14000000	10700000	21200000	10200000	24200000	13000000	5400000	8020000	7050000	11500000	12200000	5100000	2090000	2370000	3430000	2730000	12400000	13000000	9210000	2710000	11000000	9310000
FADPEESEVYELGLK	755000	18800000	13700000	1230000	11100000	14400000	21100000	16700000	7820000	8770000	8560000	7710000	16400000	7970000	0	4630000	0	7120000	14900000	NA	8480000	5760000	162000	8630000	8180000	945000	61800	NA	1240000	571000	7630000	4580000	2160000	1360000	34300	2470000
LGNNDAYAR	23600000	1140000	14400000	852000	241000	12100000	160000	135000	16900000	2170000	1480000	213000	511000	287000	1890000	271000	842000	4930000	711000	7860000	966000	697000	45800	679000	NA	959000	74900	109000	547000	801000	3210000	3290000	86900	339000	148000	1290000
AGDAIQSGADAPIK	27700000	828000	7700000	15000000	9030000	12700000	8370000	7200000	5740000	6940000	5030000	546000	588000	2410000	77700	4080000	NA	3580000	9330000	2730000	1310000	5050000	4650000	2360000	2390000	1570000	1350000	528000	3030000	1610000	3420000	2590000	2050000	3480000	6870000	3860000
VLEQTGVIGEK	7370000	17800000	16900000	9720000	16000000	8740000	22100000	19100000	22200000	3010000	5310000	8020000	9430000	9630000	0	11200000	11400000	5040000	6640000	6820000	104000	4620000	4420000	3740000	6580000	19800	1400000	6210000	5100000	4150000	8230000	3210000	8600000	3490000	13800000	4800000
VLILDEPTSALGVR	991000	879000	901000	3000000	447000	1050000	793000	839000	0	938000	755000	767000	NA	666000	753000	1780000	0	NA	2130000	356000	591000	2850000	989000	1260000	1480000	0	29500	390000	1680000	234000	490000	480000	422000	NA	465000	843000
AAVDAGFVPNDYQVGQTGK	634000	1020000	430000	0	543000	2060000	460000	1390000	230000	180000	1200000	1750000	1830000	0	NA	125000	3950000	2160000	NA	1710000	1790000	734000	62600	2750000	4240000	3100000	50700	2130000	539000	520000	4760000	5100000	723000	704000	258000	622000
SVALTYTNNDYGK	10200000	20000000	15700000	8500000	18400000	13200000	27100000	22200000	27300000	16900000	15700000	22500000	1600000	27600000	25400000	16500000	16800000	18400000	15400000	20300000	15200000	20600000	19300000	39000000	25800000	27400000	7950000	28200000	36200000	18700000	27500000	38800000	28500000	19500000	16100000	22800000
QGANEFTTR	231000	192000	594000	95800	1720000	32900	NA	1400000	662000	274000	163000	29000	191000	46400	0	184000	106000	217000	91400	322000	590000	1380000	495000	2590000	3060000	74800	507000	160000	595000	477000	477000	5940000	1360000	1500000	1890000	1510000
DSDYIPVYVPQPQYPR	84600	0	337000	4790	0	6470000	3550000	4470000	2810000	1700000	125000	0	17000	0	0	32900	4790000	88600	0	2340000	0	1010000	47300	1530000	29800	0	0	6520	122000	229000	3160000	2230000	688000	224000	0	454000
VVDGVGQEVPGVLYK	54700	731000	1190000	216000	50300	170000	1490000	190000	995000	534000	737000	976000	342000	91200	0	201000	61500	299000	308000	3390000	3190000	292000	389000	6000000	315000	909000	257000	449000	1890000	468000	1910000	2060000	0	565000	65100	406000
GTLVVNNPSAEDR	201000	2480000	768000	865000	67000	109000	491000	540000	218000	429000	291000	637000	360000	0	0	184000	6550000	589000	1190000	1110000	272000	1660000	405000	1440000	2150000	5390000	1060000	1810000	2650000	10700000	8090000	3280000	2650000	4560000	3660000	2450000
GPVVAAILEK	2020000	9880000	2230000	4780000	2230000	1180000	3400000	2360000	54800	487000	8230000	2150000	1470000	3120000	3000000	2110000	0	1270000	760000	4070000	3450000	756000	3890000	2890000	7720000	76000	2240000	270000	1550000	7750000	4030000	504000	4460000	2720000	2300000	1230000
TLIGATNPADAAEGTIR	9110000	725000	7340000	5410000	3790000	11900000	703000	1720000	1390000	8790000	NA	1460000	1940000	1050000	329000	795000	15100000	7580000	1680000	6720000	330000	9430000	2660000	7590000	1740000	3840000	1520000	1300000	4820000	4980000	12300000	6930000	236000	4940000	4080000	6610000
VLSEASSGLAQK	4260000	0	0	926000	169000	75700	214000	241000	0	901000	775000	197000	48800	0	0	536000	336000	0	1620000	1170000	0	180000	596000	1230000	1240000	0	0	299000	152000	0	0	289000	1270000	174000	2550000	1680000
DTISAAATPGGTGAVR	2120000	117000	27400	1400000	0	30700	1480000	1720000	0	397000	0	96100	NA	0	0	0	35600	42800	0	237000	27100	53100	214000	2100000	295000	0	192000	0	70900	97000	80100	1240000	0	57100	1370000	827000
TGEEVPINPR	24700000	48200	3770000	7200000	530000	14300000	4580000	1600000	3690000	16700000	16200000	13800000	4290000	0	2370	11700000	25700000	24700000	26000000	14000000	14600000	6290000	365000	10400000	701000	12900000	13900000	707000	13600000	15500000	12300000	18400000	3800000	4960000	20700000	15700000
TLAINTLSK	1270000	2670000	2840000	4010000	3340000	1340000	4140000	2830000	1410000	1040000	695000	916000	2470000	2730000	279000	3500000	1910000	2190000	3190000	1370000	1100000	2110000	NA	3540000	3500000	174000	1330000	678000	1780000	1260000	1640000	1450000	2170000	2150000	2980000	419000
VVGTDGSGLPYINVLEK	22800	57500	184000	0	365000	0	3320000	1400000	0	169000	42600	15400	82000	0	0	12000	0	0	71300	0	0	342000	0	3900000	34100	0	NA	11200	0	0	NA	726000	0	619000	17500	60000
SALDSFTGNVGSTLASGGR	639000	505000	9610000	850000	9080000	16500000	12300000	13100000	7680000	6230000	8720000	10800000	16900000	545000	0	6900000	7580000	19500000	37600000	21800000	32700000	24000000	1280000	38500000	41100000	45800000	467000	28400000	19000000	12600000	51700000	48100000	27200000	20300000	5940000	9700000
NPQTGAVIK	1610000	467000	4240000	1550000	1830000	3320000	1100000	3610000	497000	553000	1420000	2940000	157000	2700000	2380000	5900000	2830000	2840000	3430000	2170000	670000	6730000	2430000	6930000	7370000	360000	1890000	5750000	5410000	6500000	9000000	13600000	13300000	3710000	6530000	5340000
IPAVQEAVEK	35000000	35700000	22600000	44300000	16500000	16700000	10900000	16600000	18300000	12400000	12200000	10600000	1060000	8510000	97200	17900000	25000000	25600000	23900000	16500000	13400000	22600000	22600000	18100000	22900000	12800000	12400000	12300000	29000000	12600000	18400000	7700000	13500000	24400000	29000000	20900000
NQASLNPSNTVYDAK	8350000	363000	443000	339000	4660000	8950000	6640000	4780000	6220000	6380000	5790000	7950000	5140000	5230000	360000	3890000	7770000	8110000	6570000	7380000	1300000	2770000	67000	5360000	6590000	6820000	1330000	3140000	2360000	2890000	8850000	16200000	90600	780000	4460000	2970000
NAVVTVPAYFNDAQR	25100000	46200000	27400000	18000000	35100000	75000000	61700000	1580000	50500000	56200000	58200000	49600000	42400000	26600000	1910000	445000	49100000	31900000	755000	37700000	34800000	27500000	14100000	28300000	284000	32700000	9010000	483000	16700000	30300000	53800000	56600000	18300000	31700000	10800000	280000
VEIIANDQGNR	95400000	72100000	44500000	44300000	60700000	64500000	80100000	75100000	70500000	54900000	67000000	50900000	53900000	44600000	31600000	56200000	127000000	67900000	73600000	62000000	41000000	32300000	28800000	35600000	54700000	29400000	24200000	51500000	25000000	106000000	85800000	63800000	42400000	28000000	62400000	43100000
GAGQNIIPSSTGAAK	24700000	14600000	10300000	12400000	7030000	20700000	11900000	7700000	6580000	87900000	18400000	13900000	8120000	9280000	8220000	6270000	6800000	10100000	12300000	3410000	4090000	4070000	6570000	7250000	6270000	3570000	2100000	6640000	3500000	7510000	6620000	7180000	2530000	4370000	6920000	4210000
FSQALAQDPATR	3450000	4120000	15000	0	9310000	8720000	7150000	0	8770000	5530000	6980000	7780000	6580000	1380000	55200	6770000	7040000	925000	3290000	2550000	2220000	3640000	2120000	2320000	3060000	815000	793000	10600000	2250000	8120000	3240000	2160000	133000	6660000	78800	3320000
VPVGPDIIVK	4850000	9970000	3470000	6490000	NA	6510000	2410000	1410000	8910000	11300000	14400000	9470000	2880000	NA	979000	12000000	2820000	10800000	1330000	1250000	2220000	1590000	1630000	6200000	3690000	2390000	3600000	1010000	4530000	1080000	3260000	308000	811000	1770000	9400000	9670000
ISALGPGGLNR	141000	354000	84800	210000	0	649	248000	252000	0	144000	380000	180000	72200	98100	4610000	351000	9590	306000	2580000	3270000	0	8020000	4520000	9680000	8840000	61800	7020000	6310000	14700000	365000	16500000	14300000	7420000	4520000	16900000	15300000
VTEAIQEAEER	629000	2940000	941000	726000	5770000	3880000	2130000	2260000	6050000	1620000	1060000	1710000	109000	945000	1590000	5040000	2590000	81100	38300	0	31400	170000	0	1130000	655000	41900	805000	8310000	62600	8060000	0	0	0	2130000	1710000	1360000
GILEGSAVK	10300000	9130000	8630000	3540000	5910000	1190000	2970000	9430000	7130000	13800000	11800000	12600000	7560000	4030000	4880000	13900000	7000000	5990000	7780000	3510000	2900000	8310000	4990000	8080000	2350000	1550000	13800000	3720000	5380000	26200000	6540000	2420000	5940000	9150000	5320000	14400000
SFVDTLR	11800000	14900000	135000	19500000	1550000	1620000	16700000	15200000	38300000	19400000	128000	14600000	17600000	7950000	16200000	605000	279000	7530000	24600000	1030000	614000	5740000	381000	15000000	683000	2270000	20700000	55900000	914000	53300000	877000	282000	203000	669000	709000	12600000
QQVPLVNDR	46900000	36100000	32800000	36000000	40600000	66500000	73400000	60900000	56200000	54800000	50600000	3590000	55600000	24200000	19800000	43800000	78800000	63700000	1850000	29800000	47300000	44200000	21100000	41200000	38600000	35100000	25300000	65900000	27100000	116000000	48900000	36100000	13100000	64300000	32300000	35300000
QELEDLTK	14500000	11700000	3820000	818000	7000000	11300000	10500000	8200000	9310000	13200000	12900000	12900000	7310000	2900000	5550000	7810000	15100000	11800000	9770000	6220000	6070000	7040000	2890000	7430000	6910000	1450000	4070000	12300000	2050000	20800000	5930000	7230000	5750000	6250000	7620000	4150000
NQLTGEYGGVPDVQR	6370000	14800	4000000	603000	5400000	6520000	5280000	5240000	5740000	3660000	123000	345000	6710000	144000	104000	2650000	801000	4420000	NA	3530000	723000	1260000	1500000	785000	4690000	701000	60900	1710000	734000	1060000	4210000	3540000	2210000	1130000	1450000	1880000
ILTLQDYK	12900000	NA	NA	2410000	6290000	5750000	3770000	4790000	5320000	3560000	5440000	815000	5120000	1090000	718000	3700000	5410000	1740000	4030000	1660000	2900000	2820000	4840000	11200000	3740000	4460000	1600000	1880000	5550000	2150000	6630000	5900000	1560000	4460000	4920000	7880000
NAAAEGESIVR	12400000	10900000	589000	5970000	8240000	1110000	8490000	5940000	383000	5920000	7650000	6980000	1730000	989000	2730000	4590000	1170000	1360000	6160000	7230000	2390000	3850000	3740000	7400000	7130000	1320000	1240000	1830000	3140000	3020000	4230000	NA	3690000	3290000	3330000	2750000
DVIDNPEYQAK	48600000	51600000	29400000	20400000	21600000	32800000	31600000	25800000	30100000	31700000	30100000	30500000	448000	20300000	0	10500000	25600000	27400000	18000000	39800000	29800000	15400000	15000000	34800000	167000	56100000	14800000	46700000	26000000	55300000	74400000	44600000	33500000	40300000	71400	30500000
CGINYQPPTVVPGGDLAR	0	1120000	2930000	0	0	250000	2480000	2900000	4110000	0	18900	1730000	0	1230000	1730000	335000	0	328000	0	0	117000	0	0	0	716000	0	0	1240000	1690000	0	0	1140000	0	0	0	29900
EPLGPVVR	40400000	298000	15800000	48100000	26300000	37000000	103000000	69900000	31100000	1020000	45800000	49600000	43000000	137000	204000	52700000	99600000	51400000	37100000	51400000	36800000	34900000	43500000	80000000	93300000	94100000	49100000	601000	90200000	103000000	115000000	111000000	103000000	70900000	85000000	65700000
TDLSGGIQR	48600000	NA	7450000	13100000	33600000	37800000	1520000	40000000	37200000	41800000	44000000	28900000	3220000	18400000	17500000	3120000	34000000	40900000	41700000	NA	25200000	12100000	552000	23200000	31300000	33400000	NA	17300000	16800000	26600000	32800000	5650000	16600000	NA	NA	1190000
LVEYEGGGDETR	12400000	12200000	9950000	7080000	13800000	15100000	16000000	20100000	13900000	16000000	20800000	16800000	12100000	7030000	8060000	8110000	11100000	11200000	14300000	5460000	5710000	7900000	3890000	11200000	10500000	11700000	5350000	8560000	4660000	10800000	13400000	9840000	5600000	8450000	10700000	10500000
VANGAELTDPAQAK	14600000	1730000	17800000	6130000	3290000	6540000	16700000	12300000	8640000	5600000	1820000	6040000	9080000	460000	685000	4610000	8870000	5930000	1300000	5680000	1170000	4580000	4690000	6580000	1990000	1500000	NA	831000	8390000	2440000	5180000	2260000	910000	3640000	7590000	4460000
ADLGALQNR	31300000	24300000	12400000	18800000	10500000	17700000	32400000	16200000	8950000	23600000	24100000	39600000	2250000	8340000	1680000	7220000	NA	19900000	36200000	18100000	NA	23300000	8040000	8840000	10200000	14400000	17100000	5370000	8130000	7390000	6980000	4900000	4420000	6500000	17200000	23900000
EQFQLSSYK	657000	120000	2020000	441000	3020000	227000	2930000	2900000	39000	781000	1140000	743000	486000	452000	0	190000	114000	25100	313000	95600	92300	317000	129000	476000	1190000	110000	0	736000	315000	326000	537000	55600	446000	1160000	97400	475000
SSTLNSLGSFR	52000000	19900	65100	32900000	71900000	315000	53000000	67700000	132000	31100000	41700000	54600	53600000	27000000	46200	76900	44400	38400000	84100000	57800	94500	68800000	0	63000000	303000	0	178000	41700000	87300000	19600000	56000000	53800000	35600000	52200000	61300000	61900000
ASYGQGFR	57300000	3360000	5510000	25300000	8960000	1080000	27300000	37300000	1870000	23700000	7110000	375000	3220000	2140000	634000	5510000	3110000	1200000	NA	NA	1710000	37300000	36300000	27500000	3950000	1820000	NA	2700000	NA	8380000	7050000	33000000	18400000	28200000	53500000	41800000
TYNIIDATGPGFR	128000	14100000	215000	371000	9410000	652000	43000000	24000000	107000	15400000	10400000	4470000	714000	8120000	8020000	377000	0	364000	4990000	486000	158000	12500000	229000	10800000	10400000	0	40200	6070000	1800000	12300	297000	336000	5800000	6090000	131000	896000
DNGAAPNTPGVASR	3990000	4990000	2220000	67200	1330000	3020000	2680000	3160000	1940000	10300	7870	2190000	3120000	1360000	1720000	2150000	7070000	5360000	3880000	5250000	4780000	4840000	1850000	5790000	5900000	8700000	3940000	5280000	7960000	7780000	10800000	5160000	4240000	7660000	8560000	6900000
EVLGSVSSNDILSSDR	985000	83000	1650000	2950000	1350000	738000	2170000	2720000	2480000	1810000	569000	312000	480000	42100	172000	1700000	2180000	1690000	564000	863000	401000	1740000	1250000	2640000	571000	2000000	547000	404000	226000	1350000	4500000	5640000	2920000	2860000	1020000	1070000
ILFYTGK	4400000	1610000	5370000	6870000	2090000	1320000	5870000	2630000	0	7240000	1730000	1890000	1270000	2420000	410000	897000	29100	387000	842000	3290000	737000	2860000	1230000	9340000	907000	32400	920000	6040000	2570000	8570000	5370000	3710000	891000	4340000	1900000	1680000
DVNAAVATIK	153000000	129000000	187000000	117000000	217000000	178000000	217000000	211000000	346000000	213000000	150000000	822000	566000	521000	24200	210000000	192000000	158000000	149000000	149000000	128000000	187000000	146000000	132000000	107000000	95700000	131000000	112000000	157000000	144000000	127000000	93500000	88300000	118000000	98800000	122000000
VLSDAGFSEAR	41200000	28300000	4150000	30800000	7770000	28100000	7050000	7210000	8780000	23900000	28400000	29200000	13100000	9820000	6900000	32800000	38800000	49800000	65800000	31400000	38300000	32400000	28200000	25200000	37500000	33500000	42100000	27300000	40100000	33500000	39700000	29600000	29600000	27300000	48100000	46700000
VGLDPTGPLGGGLLR	0	18900000	17300000	0	17200000	0	23000000	22800000	0	12400000	11100000	6240000	20300000	10200000	0	14800000	0	0	14300000	0	0	13400000	2100000	13400000	15700000	0	0	3120000	0	0	0	4090000	5970000	5500000	283000	968000
ALDVALINAGK	24800000	68800000	71200000	26900000	48400000	16200000	44800000	40700000	37100000	18300000	18000000	16100000	30400000	31600000	2330000	18700000	942000	12800000	4640000	16900000	10300000	10700000	8540000	29800000	21600000	18300000	2840000	9240000	11500000	13900000	9350000	3440000	9900000	9230000	5630000	3720000
WASAEIVK	852000	46300	1090000	955000	885000	436000	3010000	1620000	NA	123000	32200	252000	43400	783000	158000	254000	1070000	50800	139000	303000	229000	198000	107000	264000	842000	0	420000	266000	962000	1510000	598000	200000	205000	189000	130000	212000
GLTYSVPLK	10600000	1640000	15700000	9860000	12900000	6780000	11300000	9250000	17000000	3880000	7670000	NA	740000	1710000	1630000	2240000	2230000	11300000	13000000	7380000	7510000	NA	5480000	6230000	NA	9320000	3950000	5100000	8250000	1860000	7470000	6810000	4210000	8680000	9740000	11700000
LNTLSPAPGR	65900000	48700000	20800000	30800000	5560000	50200000	24200000	3300000	NA	34200000	38200000	1590000	21300000	11300000	14300000	11700000	7950000	35800000	54500000	36000000	NA	26700000	27600000	3310000	28100000	NA	20100000	9070000	32200000	16600000	40800000	28900000	27600000	16900000	3290000	39900000
FPGQLNSDLR	49600000	449000	355000000	56800000	655000000	96100000	323000000	421000000	678000000	97000000	70900000	113000000	1100000	1720000	335000000	423000000	93100000	72200000	49900000	91800000	88400000	117000000	104000000	54600000	81400000	46300000	39800000	114000000	62500000	70000000	43300000	36000000	51300000	62300000	47100000	72700000
ALTVPELTQQQFDAK	9500000	3030000	15200000	9820000	NA	28700000	21900000	16900000	17800000	16700000	2450000	4720000	919000	753000	1390000	1080000	7380000	10900000	708000	15200000	10700000	6110000	3790000	12500000	3490000	13000000	1930000	791000	9150000	17500000	16400000	17800000	2320000	9440000	4170000	4540000
LILPGELAK	1270000000	251000	873000000	946000000	1140000000	2080000000	1440000000	20000	24400	2130000000	2260000000	74900	1090000000	160000	0	1210000000	0	107000000	1410000000	1810000000	211000000	1370000000	801000000	1200000000	1340000000	962000000	734000000	1150000000	1080000000	1270000000	20100	0	890000	1070000000	733000000	1110000000
TLIGATNPAEAAEGTLR	5800000	427000	4760000	6450000	9900000	7780000	9940000	9410000	10500000	6870000	7780000	424000	488000	664000	364000	1620000	15300000	12200000	11700000	8400000	8550000	9420000	4280000	8450000	11600000	10700000	1680000	9060000	11700000	6140000	14000000	9050000	8530000	6790000	8220000	8500000
IIPNGSNGLEER	3810000	3780000	477000	279000	1160000	1950000	3070000	4190000	768000	2420000	801000	2850000	3420000	1390000	132000	2240000	1110000	522000	347000	2490000	3020000	2600000	1210000	4450000	5470000	3300000	1910000	3120000	1480000	821000	5400000	3160000	1070000	3630000	2400000	4450000
LSPESEEALK	14900000	9020000	6030000	6230000	11500000	22500000	16000000	7760000	10800000	9940000	13600000	18800000	11700000	6950000	4990000	7380000	8030000	18400000	13700000	7550000	2040000	6370000	8020000	12400000	10700000	3490000	1080000	14200000	9370000	16900000	5610000	7600000	9020000	6160000	12000000	5660000
VAVQAVTK	11200000	12000000	9860000	9830000	11200000	4210000	7040000	9140000	7090000	874000	1280000	4370000	9790000	6590000	6380000	6660000	2510000	2390000	2390000	2150000	1430000	1930000	2750000	2630000	1970000	5900000	3670000	3860000	4860000	850000	1610000	415000	1280000	2350000	6420000	342000
NIGENTPIGLAR	2440000	16000000	3140000	8380000	11700000	5240000	29900000	17300000	3600000	14300000	9040000	3290000	12100000	17400000	1290000	8790000	3330000	2210000	16700000	1600000	4060000	3140000	5150000	8960000	13700000	4280000	6840000	11400000	7330000	1560000	17900000	4130000	7240000	14200000	2960000	12600000
GLNAKWTEGGLIYSPPFR	0	2850000	103000	0	13900000	0	NA	2610000	0	14500000	20500000	2080000	280000	150000	5920000	151000	35600	0	16900000	0	0	NA	982000	16600000	2760000	0	0	2100000	0	0	0	0	141000	18400000	0	0
QTNLPEQNFAATLQR	1670000	284000	1760000	589000	1640000	2710000	3270000	4350000	2900000	144000	216000	290000	3590000	182000	574000	828000	495000	2110000	458000	545000	428000	2300000	293000	1990000	3550000	1040000	288000	1680000	314000	162000	1780000	2100000	954000	2090000	440000	1380000
GFGPEYNLVTLNGR	36500000	107000000	76800000	29300000	62600000	92800000	142000000	97300000	363000	94100000	88800000	80300000	90500000	36500000	45900000	45100000	354000	47500	122000000	64500000	171000	89100000	26100000	95000000	86900000	773000	2420000	19400000	48300000	8540000	109000000	52600000	34800000	39300000	15200000	43200000
ALQLFNPSLR	212000	73700000	25700000	1380000	353000	11800000	33200000	30000000	219000	31700000	34400000	9790000	28200000	23900000	2070000	38200000	386000	35400000	41400000	510000	292000	37100000	24100000	33500000	29100000	951000	801000	16500000	136000	993000	243000	561000	22100000	30100000	541000	564000
AASANIIPSSTGAAK	57900000	36300000	21000000	13600000	29300000	61900000	44400000	168000	53200000	42000000	502000	47000000	45200000	1540000	222000	13900000	28000000	34100000	812000	20900000	15900000	382000	16200000	34100000	17300000	12900000	8400000	18800000	20200000	24800000	20700000	41600000	15600000	11700000	630000	9570000
FGSDLDAATLNVIEK	130000	669000	5690000	154000	NA	3260000	1330000	549000	576000	578000	985000	232000	240000	308000	108000	302000	0	380000	509000	NA	NA	NA	141000	1590000	221000	252000	150000	166000	2530000	428000	162000	6760000	25600	NA	421000	129000
VIPSLQGK	61900000	893000	24700000	53300000	19600000	37300000	1660000	18600000	17800000	33200000	2570000	474000	24600000	2540000	36900000	338000	58900000	46500000	3500000	17000000	23700000	36600000	518000	331000	25900000	17800000	38700000	143000000	46900000	2550000	22200000	20000000	14000000	66400000	38900000	28300000
IIDVTGEEPVETK	1760000	143000	983000	328000	0	779000	21600	0	0	15800	0	27600	18200	0	0	0	105000	202000	0	153000	0	101000	0	31100	141000	0	0	137000	204000	41800	316000	81300	0	0	0	92900
GVPVSAFGALVER	862000	140000	150000000	59400000	56700000	474000	153000000	132000000	101000000	101000000	123000000	113000000	84100000	71300000	3910000	56000000	1560000	106000000	82800000	197000	684000	111000000	51200000	35600000	195000000	653000	30600	94200000	136000	184000	1540000	3980000	444000	129000000	4320000	103000
LEMNLTNPSPDLPAETR	0	0	0	0	0	495000	66400	42400	0	1840	1650000	26700	53500	0	0	115000	49100	1350000	51900	1070000	26900	279000	2120000	5740000	108000	0	0	14600	6190000	0	0	0	0	1120000	0	2200000
ADGENLYGNVTEGGTK	50600	0	0	0	104000	0	0	76800	41900	0	0	28500	7640	0	0	99500	141000	77100	124000	128000	0	0	39600	28700	106000	0	0	109000	25500	134000	134000	29000	90900	34300	196000	198000
DTDPSGGLYGAGK	1040000	66100	0	62200	419000	2300000	579000	330000	76100	669000	2140000	NA	15200	47400	0	2030000	163000	154000	2450000	3360000	226000	2800000	213000	1470000	1880000	0	105000	2070000	3070000	86900	2610000	4380000	1880000	699000	3860000	4360000
VTQDFTGLNADLLGAR	0	24200	0	0	401000	284000	400000	544000	0	15600	1210000	615000	337000	59100	0	176000	0	0	1950000	3360000	0	216000	0	2110000	1410000	0	0	63200	0	131000	83200	1090000	66000	1330000	0	1670000
ELISNGTDATSK	2720000	3970000	2130000	1570000	1410000	3570000	1590000	2220000	2380000	1820000	1150000	1060000	94600	1050000	0	1830000	1460000	1950000	805000	2560000	73700	1570000	698000	869000	1300000	438000	1960000	1660000	1640000	1790000	1320000	1970000	321000	1520000	1190000	1070000
QTLIGLGLNK	1120000	441000	266000	4730000	6840000	168000	6030000	5860000	0	17700000	23100000	678000	7770000	21600	219000	12400000	0	131000	1360000	300000	0	23800000	17600000	19300000	27400000	0	141000	12300000	727000	428000	35400000	NA	19900000	20000000	17000000	NA
LSDFGLQLR	648000	15100000	3130000	14200000	76900000	88800000	3980000	48100000	14900000	112000000	10800000	71200000	66200000	910000	62400000	4370000	1580000	36100000	1290000	5980000	11700000	93500000	6320000	2360000	101000000	8340000	16700000	43700000	38600000	9350000	121000000	36500000	76100000	72500000	1410000	22300000
IDTQLPEGADTLPGVIVPR	0	231000	163000	128000	332000	NA	2080000	270000	NA	1210000	338000	268000	NA	370000	0	275000	0	144000	314000	450000	576000	517000	156000	1570000	1330000	38600	0	657000	593000	0	2720000	810000	0	1870000	19300	56500
GLLFQLER	72600000	984000	128000000	1820000	162000000	900000	1410000	107000000	4190000	125000000	2870000	129000000	166000000	154000000	150000000	149000000	275000	124000000	166000000	272000	371000	165000000	61300000	98600000	80900000	388000	1340000	386000	2040000	137000000	1500000	17900000	129000000	26600000	98200000	68800000
GLVDDAPSAIK	2510000	170000	363000	4170000	36700	4580000	523000	224000	173000	3260000	85100	336000	194000	115000	115000	516000	5370000	1950000	NA	1210000	52100	1110000	322000	208000	1160000	271000	89800	24200	332000	2710000	2850000	1510000	191000	1570000	2690000	2260000
IGTASQGAAAAER	8500000	2980000	1440000	942000	3660000	4620000	0	3460000	179000	267000	1390000	1710000	4700000	2340000	1910000	1430000	1920000	491000	7410000	2720000	820000	2140000	1740000	365000	2950000	46600	0	720000	1070000	0	2220000	4450000	0	0	4760000	409000
TGVNIINDASSGEAVAK	16600000	11600000	4170000	2900000	5210000	12400000	889000	1890000	5950000	13900000	339000	15100000	189000	3740000	367000	301000	15400000	13400000	1300000	10500000	11000000	6670000	1830000	24200000	19500000	25800000	2730000	10600000	5090000	15000000	27300000	14600000	17200000	10800000	2300000	8950000
TAIAEGLAQR	10300000	103000	5900000	4790000	5780000	1520000	12000000	4820000	748000	12200000	6900000	13100000	321000	512	931000	8040000	345000	379000	8280000	5230000	1700000	12300000	2880000	5630000	4490000	632000	8580000	6950000	9560000	7160000	6230000	7290000	3420000	7920000	5390000	8130000
DTGITNVEDFR	3670000	1010000	7570000	4420000	5890000	2050000	5380000	5200000	4170000	2430000	822000	883000	1280000	76600	233000	3680000	428000	444000	601000	374000	119000	1180000	3440000	5250000	2280000	1500000	115000	6970000	317000	568000	951000	3610000	8000000	2430000	405000	3690000
LLLLGAGESGK	6720000	448000	6810000	3410000	10800000	1180000	15100000	9260000	1470000	9760000	14200000	225000	10100000	1750000	1250000	14500000	0	1790000	5090000	2960000	1320000	8590000	3600000	8370000	4410000	1130000	2500000	7030000	1300000	685000	9670000	8680000	4560000	10300000	NA	4860000
YTGSTTGTSR	1910000	0	2380000	362000	2540000	1380000	4940000	3740000	1000000	1150000	1520000	6160000	3650000	0	0	4020000	469000	3120000	2300000	1220000	298000	1570000	1080000	1220000	265000	29900	549000	14100000	2510000	11100000	224000	104000	0	5180000	1130000	1370000
TLIGATDPAEAAEGTIR	4750000	485000	5930000	6010000	733000	7600000	909000	10400000	9600000	8160000	1320000	1180000	1030000	374000	667000	511000	15200000	13300000	1050000	9060000	9530000	10000000	5160000	8440000	14000000	1500000	2960000	393000	9800000	6810000	14400000	10500000	213000	5860000	8090000	8080000
LIGPNCPGVITPGECK	4060000	0	3830000	4270000	108000	715000	0	0	3890000	997000	0	5690	113000	35200	0	0	145000	5940000	0	1060000	NA	2490000	1750000	4150000	45000	1690000	193000	0	3370000	351000	1290000	5090000	0	847000	3340000	4470000
IIGVALEDR	15600000	26600000	0	6060000	17200000	23500	15700000	16800000	22200	19700000	24300000	20800000	19500000	18700000	22200000	9580000	0	11500000	22300000	23300000	20400000	17400000	12300000	92500000	40200000	0	5450000	20300000	0	18300000	51800000	0	49900000	10000000	18300000	15800000
GALDTAGVDGR	18600000	12400000	9110000	9990000	9040000	7680000	7010000	7040000	6930000	10500000	11400000	3980000	2050000	6340000	1130000	10800000	1420000	18700000	17900000	2930000	14300000	4350000	7690000	7610000	3960000	1000000	5330000	6290000	9130000	8230000	8720000	6900000	10700000	8090000	17800000	8830000
AADVGADLAGK	34200000	31900000	33200000	29500000	49800000	27500000	36100000	46500000	31300000	26500000	31400000	34900000	34300000	31500000	27400000	52400000	30100000	38000000	42300000	43600000	27700000	46000000	31300000	30500000	29300000	16300000	28900000	27900000	46800000	21900000	28000000	23200000	21500000	34900000	48300000	40900000
AANAAAIIAK	14000000	11500000	1370000	2240000	6890000	5170000	8110000	7230000	3260000	2200000	10200000	5330000	2970000	2060000	5520000	2350000	NA	2710000	7490000	1480000	555000	4230000	3780000	7250000	9360000	NA	2730000	10400000	8830000	6470000	9310000	12000000	7100000	11400000	6230000	4730000
EVVINTSPTISSR	19300000	2630000	71800000	19300000	43200000	30600000	47600000	58000000	39400000	23500000	25600000	28500000	38500000	30000000	337000	18500000	18200000	10700000	8370000	12200000	12700000	10400000	8070000	9480000	14300000	14600000	3290000	11000000	5390000	4170000	6640000	5570000	1640000	11400000	1810000	3960000
AGLTGLADNQK	81800000	64900000	29200000	58600000	41600000	39000000	54200000	40500000	66100000	48400000	61500000	44900000	57000000	301000	1040000	29700000	46300000	79300000	76900000	36800000	35800000	37000000	30600000	50000000	44500000	35800000	37900000	23700000	22100000	52800000	36200000	51400000	59400000	23400000	67200000	40400000
APDLGWR	0	22600000	26400000	109000	15900000	29400	31400000	13200000	28000	0	0	14200000	11400000	84200	15800000	0	0	0	0	211000	0	0	0	15300000	12600000	66100	75600	8830000	0	42700	18200000	11000000	5690000	10500000	0	40700
GVDEETFER	586000	646000	303000	82700	1110000	217000	717000	1400000	77700	404000	41000	521000	186000	0	72200	85400	87000	755000	1440000	126000	119000	609000	904000	658000	2100000	108000	109000	138000	776000	551000	1620000	1860000	1920000	825000	3110000	1560000
LLEAQPLLTK	8270000	17200000	15100000	5350000	14100000	10700000	25400000	26100000	21900000	6440000	9850000	14300000	18500000	17800000	674000	15400000	365000	12600000	11500000	7600000	3980000	7080000	4000000	8660000	9860000	76900	1650000	20600000	6680000	20400000	4230000	5150000	2230000	10500000	6010000	8120000
ELGPTYYFAPPR	0	3740000	1550000	62300	751000	26000	1290000	4700000	0	657000	845000	1090000	630000	3160000	2280000	0	0	0	4410000	50200	0	143000	142000	2640000	780000	0	0	0	102000	43100	41600	432000	128000	430000	240000	0
TPVLLDEVR	4300000	10600000	1720000	5090000	2670000	2170000	3110000	5130000	1400000	3450000	2950000	16800000	3070000	1820000	24500	15800000	236000	1550000	5400000	NA	3120000	13700000	1550000	3930000	6870000	1700000	14300000	7130000	7370000	232000	4110000	2660000	621000	6800000	2240000	6680000
ITGVSISR	65200000	31900000	32900000	18800000	27200000	6950000	43000000	41600000	235000	23500000	32100000	27000000	35800	19200000	213000	29100000	272000	4390	47800000	NA	2420000	7520000	20800000	NA	23900000	40200000	12600000	13300000	32200000	11500000	30800000	27700000	21400000	22900000	38100000	35300000
QLDADDGELTR	4040000	3450000	1240000	910000	2210000	1900000	2370000	2760000	368000	886000	1980000	304000	1580000	705000	446000	1550000	1880000	899000	1000000	962000	875000	NA	NA	1720000	3060000	836000	227000	1380000	344000	814000	1180000	1280000	1320000	551000	2830000	2930000
LVDYNVK	21000000	14900000	10300000	23700000	12400000	15500000	17800000	16400000	16000000	15500000	26900000	17400000	5560000	2600000	925000	17800000	6240000	22400000	26400000	7270000	NA	11600000	16800000	23600000	17800000	21200000	14700000	15900000	21300000	18300000	20100000	26000000	18900000	17900000	27200000	22800000
LGNYTQINAK	1110000	3200000	1980000	942000	857000	1910000	3150000	2610000	2710000	2030000	2350000	3200000	560000	704000	78800	5170000	3270000	1630000	3130000	2030000	NA	2190000	597000	1450000	1200000	1030000	399000	503000	2600000	831000	645000	NA	1120000	1800000	1170000	2600000
MEAGSCNPAGASVSR	1910000	1640000	931000	263000	719000	1620000	837000	405000	222000	2480	2730000	67600	317000	854000	264000	542000	0	1460000	843000	1310000	679000	253000	3330000	4130000	390000	962000	1610000	961000	8960000	365000	623000	884000	754000	75500	1450000	6580000
GGAANGPAAVYAIR	27100000	615000	43300000	239000	61600	25400000	70800000	1210000	43000000	25800000	24100000	22600000	922000	27800000	32500000	1470000	12100000	14600000	8670000	12600000	10000000	13000000	8740000	31400000	2650000	6060000	206000	84400	27600000	764000	20200000	26100000	535000	26100000	8630000	1420000
ADNVSTYSAR	7730000	9660000	12600000	7140000	13200000	6410000	23000000	19900000	14600000	2570000	3710000	8410000	10500000	297000	225000	8690000	6740000	5910000	4970000	6100000	4400000	5250000	1560000	6590000	5270000	8270000	3100000	4110000	2600000	3510000	6180000	6590000	4180000	522000	7030000	6030000
GASAAAIWGSR	56300	659000	238000	229000	137000	85000	929000	471000	43700	2270000	421000	1540000	513000	89300	0	109000	3090	47200	320000	536000	109000	272000	6580000	7130000	732000	39200	201000	265000	400000	281000	145000	204000	112000	4250000	5300000	NA
QGFNVDPLLQR	96700	11500000	NA	0	11200000	29200	20800000	17400000	0	10400000	12400000	6970000	141000	12500000	42800	4010000	0	0	0	0	0	12000000	4590000	14500000	13200000	0	0	4690000	28600	0	2240000	0	16700000	9390000	2260000	5110000
GIVDSEDLPLNISR	29700	0	49100	0	40800	NA	37600	2270000	0	31200	0	0	21700	522000	0	20200	0	871000	0	890000	1310000	NA	0	651000	0	1850000	385000	25400	4720000	0	428000	3000000	0	0	0	2030000
SNILLLGPTGSGK	8410000	558000	943000	5870000	6580000	712000	7880000	1150000	1230000	4100000	1290000	864000	6360000	5230000	743000	1920000	0	2300000	12100000	1580000	1170000	1070000	4810000	2330000	6960000	1080000	708000	4170000	3920000	1690000	5280000	456000	4280000	2490000	2010000	NA
SVIVVGPTLR	8260000	23800000	160000	7560000	18800000	610000	18800000	8620000	128000	3900000	13700000	4010000	10700000	15200000	2420000	36900000	860000	1410000	5240000	11400000	184000	3490000	6690000	7750000	8560000	4960000	11800000	7580000	16900000	5860000	10400000	8620000	3810000	11600000	9280000	11800000
GLIAEINNGR	537000	320000	1480000	252000	26100000	3860000	82100000	47900000	2820000	53900000	50400000	36600	35400000	30000000	6840000	930000	0	1750000	25100000	8600000	18600	1010000	12900000	11800000	17700000	0	689000	767000	9200000	25000000	393000	251000	8810000	17300000	4550000	2450000
AAADFTSQPLFR	1010000	6490000	264000	3260000	3820000	0	2100000	871000	37100	1590000	3350000	158000	2790000	2810000	0	1150000	0	0	601000	0	0	2930000	851000	5590000	3530000	0	103000	1800000	1710000	0	2710000	9920	2080000	1030000	1960000	626000
YDYPGDDITIVR	0	488000	43600	0	163000	85200	128000	15400	406000	39400	239000	120000	141000	48700	0	246000	182000	71700	3870	499000	655000	67600	1230	761000	572000	4290000	53300	1970000	4490000	1590000	11400000	8240000	6870000	2170000	6430000	163000
AVQTGQAPIGER	33300000	23900000	14800000	11100000	21800000	21200000	25400000	27300000	24300000	30800000	32800000	29600000	34300000	26500000	22000000	15000000	31500000	28300000	12400000	26300000	30900000	17600000	9800000	49200000	35500000	53600000	18300000	19800000	34600000	31200000	57500000	63700000	35700000	20700000	19900000	22300000
AGDPLIYSR	1390000	30000	1360000	412000	1900000	457000	3390000	6330000	590000	4070000	210000	80700	107000	0	172000	423000	65100	155000	150000	1690000	179000	842000	130000	2740000	4570000	304000	307000	710000	944000	1990000	2040000	1300000	1620000	1390000	1070000	1090000
QGEILANATTFR	7730000	28300000	14700000	16700000	14400000	1170000	31900000	NA	NA	9950000	9860000	10900000	702000	693000	15200000	13400000	1430000	1290000	11500000	NA	787000	9160000	7850000	16600000	16400000	NA	1920000	14000000	16400000	1640000	14200000	NA	12900000	10900000	9840000	7840000
VAIGDYAR	23400000	15800000	11600000	10700000	1670000	18800000	19100000	12000000	2050000	11300000	12600000	9140000	1510000	7040000	6150000	14100000	2850000	906000	24400000	11600000	NA	15700000	12200000	15100000	12200000	NA	7300000	8670000	13100000	7290000	16600000	20600000	17700000	13700000	16900000	15700000
ELGADPVALR	5130000	4150000	2580000	NA	2720000	4630000	5700000	4120000	8080	703000	3430000	2930000	1690000	77700	1260000	2500000	NA	216000	6430000	NA	1390000	1710000	3000000	219000	975000	3310000	70500	3530000	1630000	86500	4140000	3080000	3610000	2510000	5000000	4530000
GGYFPVNPTDESQDLR	3170000	102000	2410000	2790000	4470000	7380000	6770000	6070000	4020000	3500000	86000	655000	306000	77900	0	227000	14000000	5350000	118000	6940000	5190000	4080000	448000	2450000	6690000	NA	0	2810000	4000000	606000	5290000	NA	1280000	4100000	861000	4830000
LATEYLPIK	1250000	456000	2930000	1020000	3030000	36800	1880000	2480000	35700	675000	1530000	1040000	623000	105000	1030000	248000	0	0	233000	300000	0	393000	48600	0	90800	0	0	102000	92600	49700	32700	11600	0	92800	0	0
AASTEAVNNAK	174000	70000	0	0	285000	111000	205000	419000	162000	66700	485000	748000	1720000	208000	279000	3070000	2660000	5460000	4280000	4890000	4770000	10600000	4900000	19800000	22900000	16900000	7180000	9670000	23600000	14000000	24700000	36100000	19000000	13900000	46900000	25700000
QVNYPTPDYFDNAGAVK	223000	651000	1210000	366000	941000	768000	4190000	3140000	2550000	688000	769000	1240000	2790000	0	612000	NA	NA	170000	NA	5370000	2480000	3260000	683000	1680000	1740000	3030000	301000	643000	3460000	341000	1400000	1480000	264000	1120000	620000	2210000
YGAQTATVTEK	641000	1900000	5200000	314000	10300000	2340000	13300000	15100000	17100000	2900000	3380000	10400000	19300000	17200000	13400000	20300000	5930000	5630000	4320000	8250000	4290000	7860000	3370000	3230000	4040000	2050000	2130000	1810000	6910000	929000	867000	2260000	1730000	839000	4140000	4500000
GGLDSVVQVER	934000	11600000	9440000	2840000	12200000	5110000	3890000	3120000	2680000	25700000	3090000	30500000	26200000	19700000	23200000	30100000	4160000	1640000	27900000	NA	1820000	37300000	6820000	562000	16100000	NA	11500000	9320000	NA	2410000	6100000	15700000	4240000	1940000	3500000	13000000
IFPAIDLVSSSTR	0	140000	45400	54200	7410000	0	9810	33400	0	26500	28700	5810000	184000	67200	0	0	0	0	4570000	0	0	22500	0	188000	47500	0	0	54600	0	0	0	20200	78200	244000	0	26600
AYFGETDELLR	493000	4550000	3990000	0	286000	3490	4760000	5320000	0	1040000	137000	1860000	59400	900000	0	441000	0	0	77000	44900	54700	78300	62500	93600	137000	0	0	30000	0	0	28300	23100	0	52500	57900	0
LASPSIFANR	20100000	153000	9410000	5490000	15300000	179000	24800000	15800000	261000	15700000	13800000	126000	11300000	77600	0	4850000	402000	405000	8730000	424000	581000	936000	229000	452000	1870000	248000	408000	1500000	9610	145000	1360000	1060000	65000	1110000	187000	2590000
ILVELPGAR	4430000	1400000	13400000	5180000	19300000	18800000	10400000	18900000	372000	12600000	16800000	18700000	1310000	802000	724000	13000000	92400	4360000	18500000	1320000	2080000	9710000	939000	13200000	5730000	NA	4700000	7360000	11700000	3670000	1550000	1940000	5770000	6610000	4790000	6370000
TPGQSEVSQYQLK	7320000	8790000	9240000	915000	6450000	3870000	8320000	6740000	6450000	767000	1650000	544000	3310000	921000	1320000	4520000	2740000	2780000	1920000	969000	2530000	3380000	1520000	2720000	1050000	1780000	1700000	1090000	2030000	1530000	1020000	780000	1360000	1020000	1950000	2700000
GETDGSSYPNGGLR	59300	727000	367000	72000	82700	647000	391000	0	467000	54600	120000	451000	0	191000	638000	618000	2260000	105000	77500	710000	1680000	309000	0	7230	196000	0	0	1450000	37400	915000	367000	0	0	960000	57400	450000
IIGVTSDAR	7630000	9580000	2090000	3950000	9470000	10100000	12400000	9430000	6250000	4480000	6630000	13400000	1800000	14000000	2460000	3850000	4230000	1160000	9450000	9510000	6090000	5350000	5310000	11700000	11400000	5200000	843000	6390000	1060000	2930000	12000000	12800000	13600000	2310000	6740000	9050000
TGIPALTPVSGSAVPVR	581000	0	2560000	737000	264000	518000	86500	68000	2900000	1760000	35400	35900	39300	0	0	0	0	310000	0	550000	345000	1460000	68200	932000	0	902000	60700	0	68500	61400	532000	107000	0	146000	52500	990000
YENVDTGDSIDPK	45100000	46400000	56800000	19500000	42600000	35300000	56200000	68400000	45900000	23200000	22800000	27300000	38300000	27800000	25200000	519000	39600000	32800000	34700000	31900000	20900000	28800000	19600000	21400000	20900000	14500000	8440000	10900000	26600000	7110000	12600000	14000000	14200000	10100000	32700000	20700000
ASASTAFR	3380000	6870000	10400000	4310000	6230000	639000	1080000	14000000	83300	2100000	129000	143000	5470000	4790000	1790000	8030000	155000	249000	439000	3780000	232000	4000000	2950000	5540000	6110000	901000	507000	704000	5720000	624000	621000	359000	268000	1700000	4890000	5890000
VDYTNLITVENSQGK	748000	7310	9080000	787000	6120000	6060000	10600000	8430000	2460000	2480000	2010000	64200	7630000	0	46700	39200	NA	1610000	0	2380000	641000	2470000	529000	2300000	760000	866000	64800	240000	1130000	0	483000	669000	381000	802000	211000	573000
LAADINGPDIVR	51500000	90300000	103000000	34900000	66100000	71300000	116000000	92500000	50900000	43500000	38500000	39400000	608000	3360000	382000	53700000	81800000	44100000	68600000	32400000	37600000	53000000	28000000	46400000	36800000	41800000	4650000	10800000	31100000	7370000	14600000	21100000	18000000	20200000	19800000	20800000
GTVTGPLSDTVSYR	56300000	51900000	42900000	18800000	108000	49400000	47600000	42300000	33800000	40500000	213000	23900000	29000000	17600000	20800000	12600000	33800000	25900000	210000	20100000	29400000	18600000	7590000	27200000	1680000	32500000	2370000	822000	10900000	5660000	16500000	18400000	542000	6990000	5820000	11000000
AATPTEEQAADER	3250	0	23700	0	250000	80700	23000	77900	0	120000	0	0	0	0	0	89500	341000	74100	0	533000	33100	127000	58800	0	308000	154000	56600	115000	59900	142000	818000	659000	327000	39700	889000	1100000
EIIGQLEK	13900000	2180000	31700000	24400000	465000	13500000	22100000	775000	23600000	8700000	9600000	160000	13400000	0	749000	124000	26300000	14100000	16100000	11100000	9950000	18000000	111000	11400000	15100000	3970000	282000	20200000	25800000	18600000	17800000	9690000	1230000	57300	24300000	385000
GQVLEGTVK	4290000	2410000	36500000	23900000	31600000	20500000	20400000	26400000	11000000	9000000	2960000	2080000	2410000	1120000	1480000	10000000	907000	9300000	2170000	16400000	1050000	25200000	21200000	16400000	19200000	NA	21300000	2360000	61800000	12800000	19000000	11200000	21100000	26300000	39900000	24700000
YLANDLGPEGIR	870000	5660000	1720000	1910000	3850000	362000	530000	443000	553000	2860000	3150000	3030000	161000	583000	2730000	1720000	420000	805000	6850000	781000	NA	1870000	1180000	1210000	3120000	392000	3300	1390000	372000	95200	3170000	517000	1730000	1710000	1880000	1610000
STVDGLAGVQSDVAALK	189000	611000	2650000	1640000	2840000	6590000	7790000	10000000	6990000	2350000	487000	441000	469000	67900	0	96800	NA	11300000	107000	8420000	10200000	9770000	613000	10000000	10100000	12600000	328000	3640000	2360000	692000	5410000	4560000	3460000	2490000	1670000	5210000
QVSALAIAGAEK	1850000	6050000	39700	68600	881000	117000	4780000	3280000	35900	4900000	380000	3940000	1620000	487000	0	2510000	103000	399000	7220000	158000	0	2720000	204000	3800000	3890000	110000	0	3180000	831000	27300	2490000	2380000	2290000	1560000	1190000	1310000
YLGYSAVEK	11200000	503000	17600000	10100000	11700000	NA	13700000	14400000	172000	3920000	6760000	216000	355000	0	315000	1040000	95800	135000	26200000	9710000	50800	18000000	11200000	16500000	17500000	221000	6280000	16500000	11500000	14700000	16200000	6980000	25600000	18800000	21100000	14200000
DATATAIYGSR	17400000	2560	44400000	17400000	25200000	6760000	21800000	27100000	21100000	4690000	6490000	448000	123000	0	0	34100000	13700000	16300000	26300000	17900000	16500000	28000000	22500000	22300000	24300000	17300000	13200000	27300000	42500000	23400000	24200000	21400000	35600000	21900000	44600000	19400000
TSINDQLIPR	33200000	385000	69600000	32000000	37700000	22500000	46800000	49100000	44000000	14000000	20400000	1910000	40600000	33400000	537000	52400000	28400000	44000000	56200000	38600000	42600000	48100000	40400000	56300000	59500000	61100000	551000	57000000	81300000	38100000	50900000	51100000	56500000	50100000	64900000	52900000
YANESEVAR	21400000	19600000	8810000	19900000	11200000	11000000	10700000	9390000	10800000	9080000	986000	3550000	9190000	2080000	384000	7410000	255000	11600000	239000	4790000	4250000	NA	177000	5610000	NA	2630000	4440000	2400000	5780000	5720000	6730000	4100000	633000	4710000	6660000	6310000
EFWPAVEK	231000	0	942000	55600	361000	66800	289000	21300	31800	1950000	3820000	85400	114000	41300	86600	76300	0	0	62900	106000	0	9310000	6600000	12300000	9710000	0	2140000	3990000	NA	1490000	27600000	21200000	7910000	6760000	10400000	10600000
LLDEAGSVDSR	17300000	14900000	1030000	9870000	9900000	11300000	11900000	7180000	1990000	6840000	5450000	362000	6310000	1310000	421000	5700000	1750000	NA	7300000	5550000	843000	3360000	3760000	6950000	8680000	1510000	1290000	7880000	5070000	1990000	6270000	4040000	5560000	3470000	4330000	6520000
TPIADFGAIK	1900000	5090000	2550000	2110000	2390000	752000	1640000	2600000	329000	1240000	2340000	627000	864000	1460000	540000	271000	0	380000	2510000	1160000	394000	1340000	1500000	2100000	2630000	541000	1300000	2230000	2180000	698000	1690000	1420000	997000	2270000	1870000	570000
DVTGEAEFPGDFR	72100	85800	35200000	926000	95300	1200000	0	139000	39100000	3400000	230000	156000	19100000	0	0	14200000	2260000	1880000	1460000	1330000	1890000	82600	0	1410000	2470000	1090000	129000	7560000	205000	9090000	101000	70200	389000	4100000	73500	30800
GIELNNGR	96200000	117000000	169000000	141000000	97800000	56300000	151000000	167000000	126000000	121000000	2610000	92100000	126000000	68800000	1580000	151000	2150000	54300000	65500000	49700000	56500000	73400000	20200000	1410000	45300000	46800000	44200000	75900000	20300000	180000000	52900000	24800000	4000000	92300000	914000	32000000
VVANDPDAPR	215000	8250	4920	45800	434000	243000	165000	783000	181000	13200	409000	443000	1140000	73200	5920	3140000	1840000	598000	1850000	2870000	354000	4030000	2980000	303000	10700000	4970000	20500	5930000	11000000	1440000	1300000	15700000	2580000	586000	16000000	10100000
TTPSIVAFTENER	4540	3260000	0	147000	0	72800	4560000	3140000	NA	1430000	4420	5980000	7850000	2520000	2910000	0	0	53000	19200000	5950000	22900	134000	1730000	3850000	3930	36100	0	0	179000	163000	67700	NA	4740000	1430000	25200	739
IFVSPVEQTIR	3410000	3950000	18600000	19700000	NA	6530000	20100000	2830000	1400000	57500000	35600000	30600000	2050000	7380000	14400000	1960000	5170000	7430000	51800000	NA	NA	19900000	19000000	4860000	4350000	73300000	26800000	8990000	28400000	166000	47000000	37200000	35800000	21700000	NA	NA
IIDITLK	NA	7590000	6410000	9270000	8570000	3130000	9760000	9860000	9780	4570000	1070000	3260000	6150000	6420000	654000	NA	23300	NA	8470000	3350000	NA	15100000	4430000	2080000	8170000	32000	7630000	6430000	4180000	2450000	9260000	5310000	7880000	4850000	12700000	NA
LTNPTVAVLQER	3360000	681000	16900000	2710000	21900000	366000	43400	0	29800	3210000	6560000	9170000	0	0	0	9760000	34600	124000	12100000	8450000	239000	7990000	6110000	37600	13500000	10800000	991000	8770000	2900000	426000	10400000	473000	281000	9420000	8110000	6170000
AVLGSEGVTSNTILSPER	38100	483000	1100000	299000	1430000	721000	1960000	3390000	791000	363000	458000	52300	20500	32100	0	34200	1110000	947000	234000	1060000	75300	676000	120000	754000	2350000	882000	2580000	1020000	1190000	130000	1460000	939000	470000	481000	1570000	31900
IAEGEADAAR	13100000	10300000	1860000	7190000	6410000	2600000	9340000	1540000	979000	7320000	7500000	22900000	8810000	5790000	6920000	2900000	7770000	753000	11100000	5060000	873000	3010000	1000000	8300000	4460000	7760000	1520000	3550000	4520000	2680000	5980000	10500000	6080000	877000	9540000	976000
VIENAGDSENLK	12000000	2910000	764000	6520000	2920000	266000	3920000	2650000	596000	5450000	7620000	6270000	NA	434000	3080	345000	1470000	2590000	3240000	4300000	190000	4830000	2820000	4850000	608000	2680000	5250000	2260000	5360000	4990000	5950000	5260000	4730000	4910000	9730000	4270000
SYGAPVSDGR	28000000	13400000	5080000	10900000	12000000	24100000	14100000	10900000	13200000	16000000	14200000	13400000	14100000	9220000	9920000	9060000	19500000	24900000	28300000	18100000	21700000	11800000	9570000	13100000	10700000	15400000	8070000	6250000	10800000	8800000	16600000	31400000	14400000	5790000	26500000	14800000
AIVADPEPGTIYDGK	2450000	581000	3330000	2970000	475000	3500000	369000	795000	1700000	2290000	616000	1450000	806000	432000	197000	399000	1020000	4760000	393000	3290000	1770000	3370000	2430000	4640000	741000	NA	834000	203000	6810000	5100000	6590000	3420000	1510000	709000	3270000	4830000
VTDYLSEGQDVR	28000000	32400000	22400000	18700000	14300000	22400000	18600000	17200000	17600000	20100000	18300000	14300000	21000000	13800000	16700000	20400000	21400000	25000000	24200000	15800000	20900000	16100000	14500000	24000000	18400000	32600000	9610000	11700000	26300000	8930000	21900000	16200000	10600000	14900000	19100000	23900000
IVEGNYPNYR	165000	27300	0	0	23700	0	27900	67700	0	0	0	50400	0	49700	1140	0	0	0	140000	2390	0	879000	723000	2910000	2630000	430000	660000	1720000	2970000	903000	7400000	4590000	3970000	1610000	2350000	1230000
ANLPGAYSGDYTQR	8510000	7490000	17000000	3240000	8850000	6120000	13600000	9080000	11700000	3050000	3240000	8560000	11200000	8790000	9200000	23000000	9410000	10100000	19300000	23300000	16300000	14100000	12800000	11600000	16000000	25900000	4730000	29700000	26700000	15600000	17400000	9220000	14100000	11200000	16000000	21000000
ASFDDISGPYLAK	13000000	26500000	23000000	10800000	14200000	18700000	16600000	18600000	25200000	11100000	21400000	23700000	25000000	15500000	17400000	31100000	5070000	42400000	43500000	35900000	36200000	52500000	16500000	36000000	29100000	63200000	23600000	31500000	58600000	40500000	37500000	27900000	31700000	33800000	41700000	39600000
EGETITPFAK	8850000	7380000	8920000	4070000	3890000	7420000	6260000	5870000	NA	4580000	6030000	6810000	498000	4470000	4200000	10500000	17400000	11300000	13900000	14700000	10200000	13300000	8820000	6540000	8190000	9460000	15400000	9500000	18600000	6470000	14200000	10300000	9210000	9670000	16400000	14900000
TTPSYVAFTDSER	17100000	10400000	6170000	688000	11000000	21200000	15900000	13000000	15900000	13800000	35300	143000	18900000	9490000	9550000	58300	7500000	18700000	32800	20100000	18200000	31900	3520000	7700000	78700	7320000	2960000	8620000	3810000	8360000	11300000	12700000	0	3480000	7440000	13800000
DAGAIAGLNVLR	20000000	45400000	32900000	14400000	33300000	64200000	56700000	37200000	580000	49600000	41500000	42700000	32100000	25300000	639000	18300000	902000	1400000	34500000	25600000	10100000	29200000	7330000	18300000	22200000	128000	6410000	18400000	14700000	16600000	25100000	20900000	13500000	18200000	5460000	12700000
LVNIDPALAK	641000	7800000	6180000	1300000	2400000	2900000	2720000	NA	1290000	2020000	2850000	8070000	746000	1020000	6570000	16900000	12300000	2580000	4120000	7020000	6320000	NA	6900000	2130000	6750000	7370000	3680000	1390000	25100000	2260000	15900000	18200000	17900000	9930000	17200000	NA
LPYNYQNSSK	4720000	4570000	3730000	685000	3120000	6250000	7810000	7830000	7300000	3530000	5260000	7290000	9310000	7850000	6400000	12300000	16600000	13500000	16700000	22000000	18400000	22400000	17000000	15500000	15700000	21000000	19000000	26000000	42900000	21100000	37800000	34200000	29400000	18500000	36700000	42800000
ADTGLIPADGFIK	92600	0	0	0	731000	30400	1450000	168000	0	442000	1220000	215000	95400	0	0	1510000	0	0	816000	107000	0	4030000	1260000	1670000	1920000	0	0	NA	7770000	0	8740000	7.94	5670000	2850000	2630000	4370000
LNDTSSPENLAGNAEPK	2160000	197000	436000	21500	1100000	1270000	898000	1150000	1010000	371000	305000	244000	1390000	120000	191000	892000	870000	802000	1680000	1110000	491000	147000	217000	205000	2450000	613000	207000	2330000	3810000	12900	2880000	3180000	3350000	1070000	3540000	3040000
NGISEPYVYDR	1190000	3370000	2860000	4790000	1980000	NA	6520000	4890000	6620000	1450000	2820000	4200000	1410000	4130000	300000	7650000	5150000	2060000	5740000	6880000	NA	NA	5750000	3990000	7560000	NA	3590000	11300000	17800000	7650000	15300000	11600000	11800000	4790000	12800000	8020000
SIQGLDNFNLPSTR	0	162000	348000	44300	944000	100000	7330000	1220000	46800	27500	0	843000	14600	0	0	0	0	4480	0	6590000	117000	26100	0	11300000	0	159000	168000	0	15400000	42100	76900	NA	0	NA	0	NA
ELLPLLENVAK	0	NA	194000	0	2600000	0	1330000	2720000	24700	3840000	3630000	929000	2110000	410000	3600000	1600000	47300	127000	7130000	20500	0	6590000	789000	474000	818000	0	0	631000	0	0	0	0	1510000	16400000	0	0
TQIEDTSSEYDR	2330000	2580000	254000	1350000	1030000	2330000	102000	551000	947000	1960000	824000	2050000	559000	64900	0	6750000	44000000	2870000	6000000	2100000	5050000	1640000	980000	1290000	1200000	2900000	2870000	482000	1910000	10000000	16900000	4400000	550000	522000	3320000	544000
TTEGPFEAPTNTK	6880000	2660000	5000000	1920000	6360000	5530000	6080000	5540000	6480000	4500000	3640000	7770000	435000	2980000	484000	12200000	12600000	19000000	13100000	17200000	12300000	9900000	2080000	254000	5340000	9380000	5400000	6720000	13400000	4220000	2680000	7810000	NA	5150000	10900000	19200000
NAESTAVNASNK	19000000	7980000	3100000	2990000	8420000	12900000	18000000	9710000	9820000	11800000	13200000	11800000	15900000	13200000	8800000	3910000	13100000	18700000	10300000	17200000	13800000	7960000	5700000	27500000	27800000	32200000	4590000	9840000	11500000	10500000	34300000	60700000	28300000	5770000	11500000	7460000
QAILDAGGVVR	9010000	2990000	3670000	69100	11000000	27600	22800000	9100000	54800	13200000	18000000	18600000	21300000	17100000	100000	2930000	157000	134000	15400000	NA	33600	10300000	5520000	NA	34100000	2380000	756000	11200000	NA	8470000	34700000	52000000	29600000	7880000	7540000	5320000
AALESFTGNVTSALK	1560000	116000000	333000	2430000	28800000	514000	69400000	630000	4900000	79700000	90100000	74800000	58500000	48600	34800	46200000	288000	151000	141000000	294000	971000	103000000	188000	1210000	111000000	380000	0	36300000	36200000	13000000	93600000	53900000	59100000	892000	373000	20300000
SETELAPEEK	995000	3600000	419000	754000	855000	762000	1550000	927000	786000	1540000	1470000	1210000	2150000	254000	837000	2480000	901000	979000	515000	1790000	606000	1120000	545000	3860000	2660000	1530000	3720000	2490000	1480000	2050000	5250000	5940000	1910000	705000	4180000	1180000
VATPVFDGISESR	69200	227000	6530	0	192000	116000	278000	74300	67400	382000	67500	214000	417000	0	42100	85800	96300	205000	973000	2230000	2180000	3910000	3680000	41100	9530000	15500000	3760000	5420000	9430000	0	17200000	17900000	7430000	5070000	7280000	3450000
IAESPVSVER	12800000	10700000	9820000	1670000	9270000	14000000	17400000	17300000	16800000	10100000	20900000	18300000	22600000	18200000	12400000	15400000	25700000	30100000	37900000	27500000	26500000	20600000	12700000	25000000	20500000	29300000	12400000	8390000	13800000	8690000	19600000	29200000	17400000	6200000	22700000	26300000
NTTSPDFYNSLENLK	481000	2350000	1070000	637000	535000	1790000	3760000	648000	NA	2700000	3360000	2530000	3830000	1760000	1090000	2700000	0	1530000	2940000	3140000	2460000	5550000	229000	3330000	4170000	192000	52100	1110000	195000	68600	853000	NA	1880000	646000	693000	NA
TASLIQGVR	9500000	8250000	4840000	3790000	2990000	1410000	4360000	6870000	2280000	5960000	5540000	2920000	193000	1110000	861000	NA	1880000	289000	907000	3700000	390000	2640000	1520000	6570000	6640000	1370000	3060000	3460000	2620000	2400000	5310000	4590000	3470000	1920000	2010000	4240000
YLVDQGTVNPK	7880000	6840000	3310000	4160000	2270000	4360000	5950000	NA	5290000	6660000	5550000	1780000	6430000	2080000	2420000	1360000	3320000	2090000	2640000	2050000	7630000	2810000	1800000	6110000	1690000	6610000	1510000	3080000	2050000	2570000	7620000	6250000	3430000	3180000	1300000	4930000
ATGAVVQYSGSR	20200000	16200000	5800000	6590000	39900000	28600000	44400000	43400000	35300000	28400000	30100000	33200000	35400000	32000000	29300000	20200000	17200000	24000000	20300000	24100000	31100000	26600000	25200000	64200000	42100000	41700000	12300000	18800000	62200000	32700000	59000000	66900000	66900000	29000000	27000000	33900000
[truncated: 3,154 more rows]

## Sheet: Dataset 4
Harmful algal blooms preceded by a predictable and quantifiable shift in the oceanic microbiome
[truncated: 449 more rows]

[truncated: 4 more sheets: Dataset 5, Dataset 6, Dataset 7, Dataset 9]
