# Supplementary material
Source: publisher figshare collection journal article supplement (https://springernature.figshare.com/articles/dataset/_/27166347)
Supplement: Supplementary file 1 [file 1]

>k141\_1844706\_1 # 525 # 3137 # 1 #  
 ID=661007\_1;partial=00;start\_type=ATG;rbs\_motif=GGAG/GAGG;rbs\_spacer=5-10bp;gc\_cont=0.420  
 MFTNTKLAKSIQLAIAFGAVSGLSLSNAALAQETEEAEQVVEKIQVTGSRIKRADMEGALPVTVIDRAA  
 IEFSGQTSVADLLRNTSFNSTGSRFPQSGSSAQGVSQINLRGLGASRSLVLVDGRRLARSPSTGATQDLN  
 GIPAAVERIEILTDGASAVYGSDAIGGVVNIITRKDFNGVELKIGAAQVDVEGGDREEGSIIIFGTSSDE  
 GSMLGGVSWNSRDIIFARAFDWYTPGGSFYSONFRDYNRTDASWTRIPGACDQGEFYTIPYGPAITDSAG  
 ENNRCGFNFAVSVADEASTGNVGFFLNSRYEINDDWSIFSNMNISSSSFGRYAPSLAFVDVDAASPNNP  
 TNPDSPYYDPAFNHSIYDTAADPLVGSNSVSIHRFAGLGNRDNDVDNYLSDLLVAVEGDIDGVLVEFGV  
 RRNKSRTYDVGGRNYVVIPIAAEYMNAGTYLVGDLDRNSADVLNSMKATISRIGDYNQDEVFGSVQFDLFD  
 MDGGTAVAIVGGEWRDIFYSDQYDSLSEGGVIGGSAGNSAGGTRQVKAAYVEAVFPIQDNLEVTTAARYD  
 SYNDYGSDVSPKVSVRYNPIDELVLRASYGEGFRAPSLDILTQKESFSADSVRDPQHCLAVGLAETCSDQ  
 IDAYVIANPFLESETSTQYAFGIAYEAAEWVDFSLDYFNIEIDNRIKAFSSGELVNLVNTNQSLPAGMSV  
 ARNQFGEIERITRFGFNQGTLDTAGLDLNLNTRFDFNEMGALRSNLMSYTAKYDVDGADQLDFSAPPAY  
 RGVLSNVYSIGDFDLAWNMNIIGDTARLSGAEYLPVSTWITNDINVSYNAPWGGKVTVGSNNIGGKAPIL  
 GTDPDGSREYNFSLYDGYGRIVYARYTQSF  
 >k141\_760298\_1 # 72 # 731 # -1 #  
 ID=1110346\_1;partial=01;start\_type=Edge;rbs\_motif=None;rbs\_spacer=None  
 ;gc\_cont=0.406  
 GLAYEAADWVDFSLDYFSIEIDNRIKAFSAGELVNLQNTGQALPAGMQVTRLNSGAIDSITRGYGNQGT  
 ETSGLDLNLNTRFDFNEMGALRSNLMSYTAKYDVDGADQLDFSAPPAYRGVLSNVYSIGDFDLAWNMNI  
 IGDTARLSGAEYLPVSTWITNDVNVSYNAPWGGKVTVGANNIGSKAPILGTDPDGSREYNFSLYDGYGR  
 IYARYTQSF  
 >k141\_525571\_1 # 1 # 258 # 1 #  
 ID=1909655\_1;partial=10;start\_type=Edge;rbs\_motif=None;rbs\_spacer=None  
 ;gc\_cont=0.422  
 AWMNMNIIGDTARLSGAEYLPVSTWITNDINVSYNAPWGGKVTVGSNNIGGKAPILGTDPDGSREYNFSLY  
 DGYGRIVYARYTQSF  
 >k141\_2501366\_1 # 3 # 287 # 1 #  
 ID=2368621\_1;partial=11;start\_type=Edge;rbs\_motif=None;rbs\_spacer=None  
 ;gc\_cont=0.425  
 PAYRGVLSNVYSIGDFDLAWNMNIIGDTARLSGAEYLPVSTWITNDVNVSYNAPWGGKVTVGSNNIGGKA  
 PILGTDPDGSREYNFSLYDGYGRIV  
 >k141\_885874\_1 # 2 # 1948 # 1 #  
 ID=870638\_1;partial=10;start\_type=Edge;rbs\_motif=None;rbs\_spacer=None;  
 gc\_cont=0.527  
 IFVNSGIEVSDSLEVYAFGNYSRETLGGFYFRNPNSRGGVYTNGSTRAVVDTNIRNRATGVTSNCPALT  
 SPGSGGNGVPLDQTAVAADALAMANLPNCFVMNQPTPGGYTPQFGAQLKDASIVIGGRGDITPNLSYDI  
 SGSYGRNAVSLFLNNSWNPSPNGPDGFVNGELQRFNFDIGQNVQSETNFNIDMNYTMPVDGLASDLNIAFGG  
 EWRDERFETIVGEKNSWVAGRFAFQNVDGSNYSDGVTPLPNLSIGAHGFAGFSPEQAGYWGRSNYAVYT  
 DFEADITDSFTAGLAVRYEDFESFGDTTNFKVSGRYRLTDALAVRASYNLTGFRAPTPGQENVTKLSTITV  
 DGELQQRGQIPPTNPIAGALGAQALKPEDSKNYSLGMVWDVTGDINVTVDYFNIEIQDRIAATGTIDISS  
 RSAIAGVGCPAALAAGRNLALCLQEAGVPGAADLSSVSFYTNDFSTTTQGVDLVATWNLDGDMGNGTLN  
 AAWNWTETEVDNAGQEVNRNRVVGLENQNPQNRGVFTYNHFLNDFRFLARLRTYDDWIDSGWSGDTSRG  
 PNGLGYTINCGFNTDNCYSGESVVDLEAAYTWNNSNYTFVVGANNAFDQDAAINQNNLDGTIGDGSLYAGS  
 TPWGTEGAFYYARVRVDF  
 >k141\_2102672\_1 # 3 # 353 # 1 #  
 ID=284370\_1;partial=11;start\_type=Edge;rbs\_motif=None;rbs\_spacer=None;  
 gc\_cont=0.530  
 RSAIAGVGCPAALAAGRNLALCLQEAGVPGAADLSSVSFYTNDFSTTTQGVDLVATWNLDGDMGNGTLN  
 AAWNWTETEVDNAGQEVNRNRVVGLENQNPQNRGVFTYNHFLNDFR

>k141\_475396\_1 # 3 # 3089 # 1 #

ID=1029150\_1;partial=10;start\_type=Edge;rbs\_motif=None;rbs\_spacer=None;  
gc\_cont=0.354

DADGISLPGVTIVVEGTNRGTTSDFNNGYKINASQDDILVFSYVGYNDQSVSVDGAIQNI SMQANVLDEV  
VVVAYGSQSKASLTGVS SVTAEQIENSTYSNPVKSLEGLVSGLRIVQSSAVPGSSPTVRIRGFGSINAS  
SSPLIVVDGVPFSGNLNSINPQDIESTSVLK **DASSTSLYGNK**ASNGVLLINTKNGKKNKKASISLDSKVG  
LTQRGAKDYNVINNPKEFYETYHSIFANSEFYENDQGAGMTEAEAYKYSADNLVDNLGYNVYDVTNATL  
VDPSTGLLNPAANLLVEDYWEDSLFRDRADFKSTNLNISGGSENIDYYFSLGTEENNGYTVRSNFNRHST  
RLKLNVDNIAENISLSGDFSYSNTKSQAVPATLSGGAPTTSYSNAFAWSRRIAPIYVPVYQYDQNWDPILN  
PNNPGGYAYDMGKVQTFDDGSTREKRYAIGEHLAVIENTIETNEGDI FNGNLRGKIDLPYGFKFEYVAN  
YLTQANKFTDFSGPGSGAFAQSNNGLLTNTRNNFSAFTNQQLLTWSEEDDSNSFDFLLGHETYVEKFTTL  
SLYKNNLIGDLSPILDNASVYGSASNYNQKYVTEGYFSRFIYGMDDTYLTLTGRYDASSVFHPDERWGA  
FWSAGGSWIMSNEDEFMKNSSVIDYAKFSINYGTSGNDRINYASGGRNYVAYENQYSISENNGALAQSLFS  
LGSKEITWEKSSTLNISYDLSLNDKLNLSLAYYTKETKDLLFNNPIPLSTGQSSRPENLGTMVNSGLELE  
AGLKVYDKDNLNISLNANLSTLKNELTELPKDSIQVGNFRRVVGKSIYDYVMVKSAGINS DNQNAQYYTI  
DDSGAEVVTEDEHSVATENGRTFLGKTAIPDFFGGFGTNNVQYGNFSLNLQFSYQVGGYGLDYEYFRLLGID  
DEITNIPDYDKTWTNNQSADLPRVDPLGTDQYKTS DRYLTS LTYLSLNNINLGYTFKNEELKKYNIDSV  
RLYGTINNALLLYSERQGYDPRLSLIGSSSGEYGINRTMAFGININLN

>k141\_1470354\_1 # 1 # 432 # -1 #

ID=1344615\_1;partial=11;start\_type=Edge;rbs\_motif=None;rbs\_spacer=None;  
gc\_cont=0.368

QKVTVGTLNEINVTISEDASDLEEVVVVAYGSQKRESISGSVSVIKSDQIENATFSNPVKSLEGLVSGLR  
VIQASGQPGSDPIIRIRGFGSINADSAPLIVLDGVPYSGSLSSINPQDIESTSVLK **DASSTSLYGNK**ASN  
GVLL

>k141\_935608\_1 # 3 # 3092 # 1 #

ID=1762676\_1;partial=10;start\_type=Edge;rbs\_motif=None;rbs\_spacer=None;  
gc\_cont=0.352

DADGISLPGVTIVVEGTNRGTTSDFNNGYKINASQDDILVFSYVGYSDQSVSVDGAIQNI SMQANVLDEV  
VVVAYGTQSKASLTGVSVIDAEQIENSTYSNPVKSLEGLVSGLRIVQSSNAVPGSSPTIRIRGFGSINAS  
SAPLIVVDGVPYNESLNTINPQDIESTSVLK **DASSTSLYGNK**ASNGVLLINTKKGQKNKKSTISLDSRIG  
VTQRGAKDYNVTSNPKHFYETYHSIYANSEYNDQNTNGDGMTEAEAYQYATDNLISNVGYNVYDVTNAAL  
VDPSTGLLNPAANLLVEDYWEDALFRDNADFKSTNLNISGGANNIDYYFSLGTEENNGYTLRSNFNHST  
RLKINADEIAKNISLSADFSYANTKSQAVPSTFSGGAPASFYSNSFSFVRRVAPIYVPVYKYDQNWNPILN  
SKNASGYEFDMGAEQTFADGSTRGSRKYAVNEHPLAVIENTIQTNEFDIFNGSIRGKIDLPYGFNF EYVS  
NYLSRASKSTDFSQTGSTVFATSNNGTLVNGRNNFSAFTNQQLLTWKNETDGNSFDFLLGHETYVEKFTT  
LSMYKTNLIGDVSP IINNASVYKSASNYNTKYATEGYFSRFIYGKDDTYFLTLTGRYDASSVFHPDERWG  
VFWSAGGSWIMSNEEFMKNLSAIDYAKFSVNYGTSGNDRIFYASGGRNYVAYENQYEITENNGALAQSLF  
SLGSKEISWEKSSTLNVSYDLSINNKNVNL LAYYIKETKDLLFNNPIPLSTGQPSKPENIGTMENSGLEL  
EAGWMPYDKDDLSISLNANLSTLKNELTELPKDSIQVGNFRRVVGKSIYDYVMVRSAGVNP DNQNAQYFT  
TDSTGKEVITEDHADATTDGRAFLGKTAIPDFFGGFGTNIQYGNFSLNLQFSYQIGGYGLDYEYFGLLGI  
DSEVTNVPDYNKTWTNNKTADLPRVDPLASDQY AISDLYLTS LTYLGLNNINIGYTFKNEELKKYNINS  
VRLYSTINNALLLYSARQGYDPRLSLIGNSAGEYGINRTIAFGLKINLN

>k141\_1968774\_1 # 1 # 1302 # -1 #

ID=349065\_1;partial=11;start\_type=Edge;rbs\_motif=None;rbs\_spacer=None;  
gc\_cont=0.389

IVGGVTGDDSSITWSYEH SQRDIIYLTDREYTAGRAPTD DNFSTGFSLSSYAWNYILNEDDPANGLVKGQ  
WLPAAECGGDSRFVQDGKTYILGAAPTGGLDNNYLCTFDYTQIMAQDAGKKS DYFTVNYDKELGNGNTAY  
AQVVASRQETFGRYAPPAAFINPY PAGLANVR **IPAQADGTPER**VVTNLNVPVQLRKRFIEIGPRASANTDW  
TGNVVVGFTGEVMNDYTWDISMQWHIADYLTNDCCYLQKPEYSQAAQGFKDDGFYTVGGTKYYSLFDPKV  
VAYYTSSPSVTSHSQFRSLEYTIGGPLKMVPD TDFVAGVQSAEYNYENIYDKQSEVGNVGGSSGNSSANS  
RDYTAMFLETKTSLLDGRGELSVAVRSDDYSDFGKNTSWTVKGLYDVM DGLTLRASMGTGFRAPGLGLDA  
SNTTFSAEYHYDYV

>k141\_2388518\_1 # 1 # 1716 # 1 #

ID=380358\_1;partial=11;start\_type=Edge;rbs\_motif=None;rbs\_spacer=None;  
gc\_cont=0.389

QPVVVITQESIARTGDLGIAEVLRLDLPINIAGSFYERSGSSAGSQAQISLRGLGAGRTLVLIDGRRIPGS  
PKLDGASANINLLPTAAVERVEILADGASAVYGSDAIGGVNVITKKGFDGMTISGSIGQPDLPGGEEEEK  
FSIVGGVTGDDSSITWSYEHSQRDI IYLSDRDYTAGRAPTDNDFSSGFSLSYAWNYILNEDDPANGLVK  
GQWLPAECAGDTRFVGDKTYILGAAPTGGLDNNYLCTFDYTQIMAENAGKKNDYFTVNYDKELNGTS  
AYAQVVASRQETFGRYAPPAAFINPYAGLANVR **IPAQADGTPER**VVTINVPTQLRKRFIEIGPRASKNT  
DWTGNVVVGFTGEVMNDYTWDISMQWHIADYLTNDCCYLQKPEYSEAAQAFKDTGTFKGQTSLFHPDVVA  
YTTSSPSVTSHSQFRSLEYTIGGPLKMPD TDFVAGVQSAEYNYENIYDKQSEVGNVGGSSGNSSANSRD  
YTALFLETKTSLLDGRGEVSLAVRNDDYSDFGTNTSWTVKGLYDVM DGLTLRASMGTFGRAPGLGLDASN  
TTFSAEYHYDYV

>k141\_1983866\_1 # 1 # 1359 # 1 #

ID=624531\_1;partial=11;start\_type=Edge;rbs\_motif=None;rbs\_spacer=None;  
gc\_cont=0.387

IVGGVTGDDSSITWSYEHSQRDI IYLT DREYTAGRAPTDNDFSTGFSVSSYAWNYILNEDDPANGLVKGO  
WLPAAECGGDSRFLQDGKTYILGAAPTGGLDNNYLCSFDYTQIMAQDAGKKSDFYFTVNYDKELNGNSAY  
AQVVASRQETFGRYAPPAAFINPYAGLANVR **IPAQADGTPER**VVTNLNVPVQLRKRFIEIGPRASADTDW  
TGNVVVGFTGEVMNDYTWDISMQWHIADYLTNDCCYLQKPEYTEAAQAFKDSGTFRGQTSLFHPDVVAYY  
TSSPSVTSHSQFRSLEYTIGGPLKMVPD TDFVAGVQSAEYNYENIYDKQSEVGNVGGSSGNSSANSRDYT  
ALFFESKTSLLDGAGELSVAVRSDDYSDFGKNTSWTVKGLYDVM DGLTLRASVGTGFRAPGLGLDLAANTT  
FSADSHTDYVKCAAQGIARPDCPSEQVNTYISA

>k141\_2758928\_3 # 2300 # 2770 # -1 #

ID=2030248\_3;partial=00;start\_type=ATG;rbs\_motif=GGAG/GAGG;rbs\_spacer=  
5-10bp;gc\_cont=0.539

MPRRRVVAKREILPDPKFGNII LAKFMNHVMVDGKKSVAEKIVYGALD VVASKTNADPLEVF EKALEAIA  
PMVEVKSRRVGGATYQVPVEVRVERRNALAMRWLVEHSRKRGEKSMDLR **LAGEIFDASEGR**GSAVRKRED  
VHRMAEANRAFSHYRF

>k141\_1107324\_5 # 3900 # 5630 # 1 #

ID=2338890\_5;partial=01;start\_type=ATG;rbs\_motif=AGxAGG/AGGxGG;rbs\_spa  
cer=3-4bp;gc\_cont=0.522

MQYRSLSSLSRISGLRQTNHFGAILALSLSLILTACGGGGSTVTDNPAADPGPDGIAPTLLNVS IKQSK  
TRNGSADGTAKLGDSITVTFEASEGLMRPEVTIGGFAADVNGKIGDWTAVREMTELDMDGVVDFTITYTD  
ISGVEGVAGTATTDESAYEYCAEGCPEPEPISLAGTWRLDAAGVGPTAGSREWFALNRSNADDVAARPCL  
FDDAFVLGADGSFANQMGTDTTWVEGWQDTEAGEGACLT PVAPHDGSIAASYVYDEAAATLT LNQGGAHLG  
LAKVVNGSELASPSEAPESVTTYTVLTFDGDFLSVVVVAGDGVYWSYDLVKDQPSALAGTWRL **LDAAGVGPS**  
**AGSR**EW FALNRSSADDVAARPCLFDDAFVIGADGSFTNQMGDTTWVEAWQDAEAGEGACLT PVAPHDGS I  
AASSVYDEAAAGTLTLNGKGAHLGLAKVVNGSELASPSDAPDSVTTYTVSTFDGDFLSVVVVAGDGVYWSYD  
LVKDQPSALAGTWRLDAAGVGPTAGSREWFALNRSSADDVAARPCLFDDAFVIGADGSFANQMGDATWVE  
AWQGAAADGCATPVAPH

>k141\_2474684\_1 # 2 # 295 # 1 #

ID=1895593\_1;partial=11;start\_type=Edge;rbs\_motif=None;rbs\_spacer=None  
;gc\_cont=0.524

YTVLTFDGDFLSVVVVAGDGVYWSYDLVKDQPSALAGTWRL **LDAAGVGPSAGSR**EW FALNRSSADDVAARP  
CLFDDAFVIGADGSFTNQMGDTTWVEAW

>k141\_2119559\_1 # 2 # 949 # -1 #

ID=574193\_1;partial=11;start\_type=Edge;rbs\_motif=None;rbs\_spacer=None;  
gc\_cont=0.444

YAELYDIATGQLGTDYSPAPFDQDFFMILNVAVGGQWPEGVNEG GIDASAF AEGQTLEVDYVRVYKCSAD  
PDTGRGCETVAPGYDIDTTDGGMLVEGRAPAPTLVAGAPT PITIFDDEININWVAWDCCGGSTPGLVADD  
AERGNVYEFVQNGNDGT VFGVITR **SAFLSSDPTSPSR**ATPHNALSMIDGGYITFDMKVM TAPTSPDSVW

KFKIEADEAAGGAWEADLTTFGDAPVVGQWTTYRIPLQDVADNGVDISLIDVLMVFPWMTGADAVFRLD  
 NIAILQDTVGVTYPEFPVSTNTDWALWDCCGGSTPA

>k141\_2541674\_1 # 2 # 280 # 1 #  
 ID=682270\_1;partial=11;start\_type=Edge;rbs\_motif=None;rbs\_spacer=None;  
 gc\_cont=0.452  
 ADGGMLVEGRAPAPTLVAGAPTPITIFDDEININWVAWDCCGGSTPGLVADDAERGNVYEFVQNGNDGT  
 VFGVITR**SAFLSSDPTSPSR**ATP

>k141\_912643\_1 # 3 # 281 # -1 #  
 ID=1369455\_1;partial=11;start\_type=Edge;rbs\_motif=None;rbs\_spacer=None  
 ;gc\_cont=0.448  
 EFAVQNGNDGTVFGVITR**SAFLSSDPTSPSR**ATPHNALSMIDGGYITFDMKVM TAPTSPDSVWKFKIEAD  
 EAAGGAWEADLTTFGDAPVVGQW

>k141\_2454169\_1 # 1 # 2370 # -1 #  
 ID=1551780\_1;partial=10;start\_type=ATG;rbs\_motif=GGA/GAG/AGG;rbs\_space  
 r=5-10bp;gc\_cont=0.441  
 MKNRMTNFTKLGA VLSVLTLTACGGGTETKTDLNAVNP SAPVDDWRLVWSDEFDGTAINADNWTHEVNCL  
 GGGNQEKQCYTDSAENSSVSGGMLKIVAKQAADGAEQPYTSARMTTQNKVDIQYGRVEMRAKL PKGQGSW  
 PAFWMMPTDSVYGGWPKSGEIDIMEAVNLGAARADGTEEKSIYGTIHYGAGPGSDFSGNSYSPTTSPADS  
 FNTYAIEWQEGEIRWYFNNVLYATQRQSKLRTTGDGTVLGLSHRGWYAELYDVATGQLGTDYSPAPFDQD  
 FFMILNVAVGGQWPENVN EGGIDASAFAEGQTLEVDYVRVYKCSADPDTGRGCETVAPGYDIDVADGGML  
 VEGRAPAPTLVAGAPTPITIFDDEININWVAWDCCGGSTPGLVADDAERGNVYEFVQNGNDGT VFGVIT  
 R**SAFLSSDPTSPSR**ATPHNALSMIDGGYVTFDMKVM TAPTSPDSVWKFKIEADEAAGGAWEADLTTFGDA  
 PVVGQWTTYRIPLQDVADNGVDISLIDVLMVFPWMTGADAVFRLDNIAILQDTAGVSYPEFPVSTNTDW  
 ALWDCCGGSTPAIVTDAEKGQVVEFAVLNNGSGTVLGFNTRSDSGGNDAPINVTEIAANGVLSFDLKVIN  
 APAAGNEAWMLKVESAGATGATEVNLNTSSEGVNPSDVWQTFTFPIAELMDAGSIDPSALDVIMLFPWAG  
 SGADAVFRVSDVKFHVPGSGAAAPVAPLATFIDAGSVNENWALWDCCGGSTPEFVNDETNGQVAEFK**VLN**  
**GNSGTVLGLNSR**TTDGGTGV

>k141\_2597430\_1 # 1 # 1212 # -1 #  
 ID=1707797\_1;partial=11;start\_type=Edge;rbs\_motif=None;rbs\_spacer=None  
 ;gc\_cont=0.431  
 GSTPGLVADDAERGNVYEFVQNGNDGT VFGVITR**SAFLSSDPTSPSR**ATPHNALSMIDGGYITFDMKVM  
 TAPTSPDSVWKFKIEADEAAGGAWEADLTTFGDAPVVGQWSTYRIPLQDVADNGVDISLIDVLMVFPWMT  
 GADAVFRLDNIAILQDTTGASYPEFPISSTNDWALWDCCGGSTPAIVTDAEKGQVVEFAVLNNGSGTVL  
 GWNSRTTDGGTGISSNVTEIASNGVLSFDLKVMNAPAAGNDAWMLKVESAGATGATEVNLNTSSEGVNPS  
 DAWQTFTFPIAELMDAGSIDPSAIDVIMLFPWAGSGADTVFRVSDVKFHVPGSGAAAPVAPLATFIDAGA  
 VNANWALWDCCGGSTPEFVNDETNGQVAEFK**VLN**GNSGTVLGLNSRTTDGGTGV

>k141\_2221288\_1 # 3 # 335 # 1 #  
 ID=2335664\_1;partial=11;start\_type=Edge;rbs\_motif=None;rbs\_spacer=None  
 ;gc\_cont=0.441  
 EFAVQNGNDGT VFGVITR**SAFLSSDPTSPSR**ATPHNALSMIDGGYIAFDMKVM TAPTSPDSVWKFKVEAD  
 EAAGGAWEADLTTFGDAPVVGQWTTYRIPLQDVADNGVDIS

>k141\_2556990\_1 # 3 # 380 # -1 #  
 ID=955555\_1;partial=11;start\_type=Edge;rbs\_motif=None;rbs\_spacer=None;  
 gc\_cont=0.362  
 INAPTRITLRS**SSSGIANQAVK**QHELLNTDDQMIYSWEALKNSDVYVNGISSAQAGENASNNLVTSLGYNP  
 YGTSVPNPVDANGNLVTS DKLWETNWADLLFNEAAIRTEHGLTASGGSDSSTYFFS

>k141\_712534\_4 # 2594 # 5728 # -1 #  
 ID=280901\_4;partial=01;start\_type=Edge;rbs\_motif=None;rbs\_spacer=None;  
 gc\_cont=0.333  
 FITMKTKFNGVLTLLLVLFVQISFAQKKNISGTVSDVSGPLPGVSILVEGTRTG VETDFDGKYAIKASSG  
 DVLI FRYLG YKTTQKVVGNSNTINVKLQEDANSLEE VVVVAYGSQT KESIVGSVAVVTNEVIEKQQLVSV  
 TNALQGT VSGVNI ISSGGQPGNNPTIRIRGVGSINADASPLIILDGTPYNGNINSISADQIQSMNVLKDA

SSTALYGSRGANGVILINTKKGKINAPTRITLRSSSGIANQAVKQHELLNTDDQMIYSWEALKNSDVYVN  
GISSAQAGENASNNLITSLGYNPYGTSVNPVDANGNLVTSCLKWETNWADLLFNEAAIRTEHGLTASGG  
SDSSTYFFSANYLNQEGSISESDFERVTTRLNMTSMLKDWLKIGFNTSYSTSKQNNPTQSGSSYQSAVQW  
TTSVSSIIPLYKRDEGALINDNFGNPIFDYGNNSSQAVNGTRPRLEGENAYGALFNYININNRDNIQAN  
GNVQIKFSDYLNFKTTLGFEKVLFDYGYVHNEFGYAANVAGRVSQTRNITTTTNLINALNFDKTFYDKH  
SVSASLIQEAYKLKIEGLNAQGVGFLPNVKVLNGSTTPEDVGGFLSEERMESYLARFAYNFDTKYFIEGS  
YRRDGSSRFSEETRFGDFYSVGGSWIISKENFLAGNSVLNLYLKLSGSYGELGNNRGIGYFPYLSLFETGY  
NELTQTGVILGAVSDPLLSWEKTASLNTSLDFGMDNRISGSLAYFERESIDLINPKPLPGSTGNTSITT  
NVGSIKNSGIEFELNTINIETDMFKWSTNLNITKTNEITELTQESFINGTKKWEVGKSLYEFFLREYAG  
VDSSNGKALWFKDILDAEGEETGEKTTTVDYADATRYSTGKESLPDFQGGITNTFIYGDGFDLNLVLMNFSV  
GAYVYDSTYAGLMGSFETLGSGSSVDISNRWQKPGDITNVPRLQNSQNDFNASSTRFLFKNDYLRKALT  
LGYNVPTNKIENIGLSRLRLYFQGDNLVTFQSHKGIDPEQSLAGTTNNRSFNQRIFSLGVNLEF

>k141\_1532868\_14 # 18027 # 20369 # 1 #

ID=34121\_14;partial=00;start\_type=ATG;rbs\_motif=None;rbs\_spacer=None;g  
c\_cont=0.357

MKKLFFSVCFSEFVAVAAFAQDEEQEKEIVTTDLEEVIVMSGIIDLAKDRKTPIAVSNITTSEIERKGGSF  
DLIEVMRSTPSVQINRGSGFGDGQMYLRGFDQTNTAFLINGQPINGVEDGKMYWSNWSGMIDVAEEIEIQ  
RGLGSSKLAISSVGGTVNIVTKTVDAKEGGVYKSMIGNDNFYKNSLYLSSGLNDNGWAYAMFLGHWSGDG  
YMQFSKGQGGQTYFYFSVGYKPNDNSVFNAFITGAPQWHGSGGGENLQKYLDEGFDYADWGGVRNGEIIYPGG  
RNFYHKPIYNLSWDWTINDNSSLSTVLYGSHGRGGFAYNEGKFYYTDQGMDYDKIIAENAAGNSEGIVK  
ASVNGHNWYGAVSNYSSQINENLSFNLGFDFRFYNGIHFRTPDYGLSSYKGATKSYGYNPWDVDFDFP  
KGSRDDYHISYDYEEDITYSGLFGQLEYSNENSSYYFQGAUSSQSHLKEDFMFDLGKAEVNTNTGYNLKV  
GGSTSVGDYSKVYANFGFYSRQPFHDDLYANIRYSNNLNIGGAENQEITGIELGYVYEKDSFKAIIDLYS  
TTWDNRILSSTEYDDDNVILSYSQSDPISQVHKGIEGQFFYKPSMDIMLKAYFSLGDWTYNSNVKSTTFN  
EAGQTLSEGDVAYLDSVKVGDAQTTGGIEMMYIVNDRSRVDLSLNHYADLYARVNFSDDIFENAGNSGT  
IKLPSTHTLVDSYTMDIPLKDNNEARLGIFNLFDTKYIEEMTRNNPVTGDSTVWRGIDTSNRVDPGYLR  
TWTLGFKYKF

>k141\_2370233\_1 # 1 # 861 # 1 #

ID=86816\_1;partial=11;start\_type=Edge;rbs\_motif=None;rbs\_spacer=None;g  
c\_cont=0.541

IALGLLVPAGFAPLALAQQAVEMVEEIVTIGSRRPQRSNTDSSVPVDVISGDEFVNMGFADMDDMLKTAI  
PSYNVARNEISDAATIVRPANLRGLPDPNVILVNGKRRHRSGVIAELGGSLSGSGQADISAIPMAIK  
QVEVLRDGAALYGSDAIAGVIGFQLNDSAEGMSLEVRTGESGEGDGGLTQVQGNIGLPLGDDGFLNITG  
SWMEQDPTSRVQRTDAINLLTNGNAAQKASVASPYAQVWGAPEQIDNYNIFVNSGIEVSDSLEVYAFGN  
YGSRETL

>k141\_1171625\_51 # 59948 # 60910 # 1 #

ID=945846\_51;partial=01;start\_type=ATG;rbs\_motif=GGA/GAG/AGG;rbs\_space  
r=5-10bp;gc\_cont=0.548

MINRPKMARRVLPATAIALGLLVPAGFAPLALAQQADEMVEEIVTIGSRRPQRSNTDSSVPVDVISGDEFV  
NMGFADMDDMLKTAIPSYNVARNEISDAATIVRPANLRGLPDPNVILVNGKRRHRSGVIAELGGSLSGSG  
SQGADISAIPMAIKQVEVLRDGAALYGSDAIAGVIGFQLNDAAEGMSLEVRTGESGEGDGGLTQVQGN  
IGLPLGDDGFLNITGSWMEQDPTSRSLQRTDAINLLTNGNAAQKASVASPYAQVWGAPEQIDNYNIFVNS  
GIEVSDSLEVYAFGNYGSRRETLGGFFYFRNPNSRGGVYTNGS

>k141\_1128271\_1 # 2 # 1897 # 1 #

ID=251728\_1;partial=10;start\_type=Edge;rbs\_motif=None;rbs\_spacer=None;  
gc\_cont=0.455

EFKVLNGNSGTVLGLNSRTTDDGGTGVSVDATSLLATGVFRFDLKVMTAPAAGNEAWMLKIESGGAAGAVE  
INVNTSNEGANPSDAWQTFTFNLIDLFDAGTLDPDSIDIVIMLFPAWGSGADSVFRVDNMEIIDGSAGPSA  
PTTPTTPDNGGEPSEPTTPTTPEGPSDTASLAPLFTDSARTGWIVWDCCGGSTPAIVADTERGQVAEFTV  
VASGETVQGFTTAAVGGSDALLDVSAFEMTGSLSFDLKVVSAPTTATAWMIKIESNGGVENGGTGEAVE  
LNINTSNEGLDPVTGQWQTFTFDLIDLTLNAGLDITGIDVVLVSPAWTGGGAVYQIDNLQINKESSGTTV  
TSDAVVMVPFDGSGAALDGTFTTVPASAVDWAGFANDNATIYPFNADGGTITFTAAIPEGGVDTSVRFR

FENAPYPDVNPAPFDAGTAIVNSSTATTYTITIPAQDAANNFSSLLMYVDTRDAPVTITDIVVTEGSATVT  
PPATSDAVVMVPFDGSGATLDGTTFTVPASAVDWAGFANDNATIYPFTTFANGGTITFTAAPDGGVDTTV  
RFRFEKAPYPDVNPAPFDAGTAIVNSSTATTYTINIPAQDAANNYSSLLMYVDTRDAPVTITDIVVSETAA  
Q

>k141\_73154\_1 # 3 # 203 # -1 #

ID=1303044\_1;partial=11;start\_type=Edge;rbs\_motif=None;rbs\_spacer=None  
;gc\_cont=0.448

WDCCGGSTPEFVNDETNGQVAEFKVLNGNSGTVLGLNSRTTDDGGTGVSVDATSLLATGVFRFDLKVM

>k141\_390277\_1 # 3 # 614 # -1 #

ID=2045797\_1;partial=11;start\_type=Edge;rbs\_motif=None;rbs\_spacer=None  
;gc\_cont=0.420

NGAVNESWVFWDCGGSIPEFVNDDTNGQVAQFSVLNGNSGTVLGLNSRTSDGGNGVSVDATSLQATGVF  
RFDLKVINAPATGNEAWMLKIDSGGSGSVEINLNTSNEGANPSGAWQTFTFNLVDLLDAGNLDLSDIDV  
IMVFPWGTGADAI FRIDNMEIIDGSAAPITPSNVGNNGDETDDGGSNSGTDDGGTDAGDPTLAVM

>k141\_968151\_1 # 2 # 2221 # 1 #

ID=2322671\_1;partial=10;start\_type=Edge;rbs\_motif=None;rbs\_spacer=None  
;gc\_cont=0.411

EFKVLNGNSGTVLGLNSRTTDDGGTGVSVDATSLLATGVFRFDLKVMTAPAAAGNEAWMLKIESGGAAGAVE  
INVNTSNEGANPSDAWQTFTFNLIDLFDAGTLDPSDIDVIMLFPAWGSGADSVFRVDNMEIIDGSAANVP  
STPSTPNTGGETVEPEVPAEPEPVVYAIGQEI IADGSFTDTESTAWTAGTITAEGNNNVLVSEVSTAGDP  
WSVNVSQVLTLEPATNYTLKFKAKATEARNIIAGIGQNAAPYYSDETVVALTTEWIEYTLNVASVDLTG  
EIFGDDGSRVLFDLGAEVGDVTLDDVSLVKSTQLVVDGGFEYGVTYWNAGTVTAEGENNVYTADVTAAGD  
PWSVSLSQVLTLPVPSKSYEVSFKAKASQDRMTIGGLGLNAAPYHSSTETILLTTEWQFTFTYTFVTNDDTT  
GTPYGDDNSRVLFDMGADVGVVFI DDVTVTALSCELLSNGFEDGNTNWNGGEIAIDGENAYFTANVASA  
GDPWSVNLSQVTTLQPSKDYVLTFKAKGTPDRTMIAGIGLNAAPYHSSTNIVTLAAEWQFTTYLLTSNDD  
TTGTPYGDDNSRVLFDMGADVGEVSIDDVSLVPVEAFNQLVTNHDFSTDIEGWNGGTVIDADNSFFQAD  
VASAGDPWAVNLSQVLTLPVPSKEYVLTFKAKGSVDRSMIAGIGLNAAPYHSSTNIIGLTTEWQFTTYTLI  
SNDDTTGTPYGDSNSRVLFDMGAEVGVVSIDDVKLFEKK

>k141\_920231\_2 # 356 # 976 # -1 #

ID=1488965\_2;partial=01;start\_type=Edge;rbs\_motif=None;rbs\_spacer=None  
;gc\_cont=0.415

PVYKFGWGISLPTQQLFEAYDNGDARRDETLFKPNASDYTVSRENTGYFCKKYLPTQANEDSR TGGDPLN  
YENNYRAIRYADVLLMAAEAEAQSNGADAITHLNTVRARAFDDNSHDYPYNGENDLLEAIYNERRIELAT  
EGHRYFDLVRTGRAKAAAYDAYNTAISGNDVFEAITFEENKNEVFPIPLVELELANATSRWGQNTGY

>k141\_526224\_2 # 354 # 974 # -1 #

ID=1920870\_2;partial=01;start\_type=Edge;rbs\_motif=None;rbs\_spacer=None  
;gc\_cont=0.420

PVYKFGWGISLPTQQLFEAYDNGDARRDETLFKPNASDYTVSRENTGYFCKKYLPTQANEDSR TGGDPLN  
YENNYRAIRYADVLLMAAEAEAQSNGADAITHLNTVRARAFDDNSHDYPYNGESNLEAIYAERRLELAT  
EGHRYFDLVRTGKAKAAAYDAYNTAISGSDVFEAITFDENKNEIFPIPLVELELANATSRWGQNSGY

>k141\_1523862\_1 # 1 # 279 # 1 #

ID=2239338\_1;partial=11;start\_type=Edge;rbs\_motif=None;rbs\_spacer=None  
;gc\_cont=0.380

NYLPQNNAPRDYSGPVYKFGWGISLPTQQLFEAYDNGDARRDETLFKPNASDYTVSRENTGYFCKKYLPT  
QANEDSR TGGDPLNYENNYRAIR

>k141\_2388149\_1 # 1 # 363 # -1 #

ID=375592\_1;partial=11;start\_type=Edge;rbs\_motif=None;rbs\_spacer=None;  
gc\_cont=0.438

KKYLPTQANEDSR TGGDPLNYENNYRAIRYADVLLMAAEAEAQSNGSDAITHLNTVRARAFGDNSHDYPY  
NGENDLLEAIYNERRIELATEGHRYFDLVRSGRAKAAAYDAYNTAISGSDVF

---



>k141\_1781747\_1 # 3 # 467 # 1 #  
 ID=1920732\_1;partial=11;start\_type=Edge;rbs\_motif=None;rbs\_spacer=None  
 ;gc\_cont=0.398  
 WKTSLVVSALVTFIAAVHYFYMRDVWVATQTSPTVYRYIDWLLTVPLLMIEFYILILRAIGVASAGIFWRL  
 LIGTLVMLVPGYLAEAQYMDITVGFVIGMLGWFIYILWEIFKGEAGKAAEANASPAVKYAYNAMRWIVTVG  
 WAIYPIGYVAGYMLS  
 >k141\_1802724\_1 # 3 # 281 # -1 #  
 ID=2263420\_1;partial=11;start\_type=Edge;rbs\_motif=None;rbs\_spacer=None  
 ;gc\_cont=0.405  
 LGWFIYILWEIFKGEAGKAAEANASPAVKYAYNAMRWIVTVGWAIYPIGYVAGYMLSVASPEALNIVYNLA  
 DLVNKVAFGLLIWIYAATSESQKD  
 >k141\_1050647\_1 # 3 # 608 # -1 #  
 ID=1334662\_1;partial=11;start\_type=Edge;rbs\_motif=None;rbs\_spacer=None  
 ;gc\_cont=0.394  
 TKIITWTAIFIMFMMPTSAYAADMALPDDFVGISFWLISMALMASTVFFLWETQSVTAKWKTSLVVSALVTF  
 IAAVHYFYMRDVWVATQTSPTVYRYIDWLLTVPLLMIEFYILILRAIGVASAGIFWRLIGTLVMLVPGYL  
 AEAGYMNITVGFVIGMLGWFIYILWEIFKGEAGKAAEANASPAVKYAYNAMRWIVTVGWAIYP  
 >k141\_82879\_1 # 371 # 1180 # 1 #  
 ID=1488634\_1;partial=00;start\_type=ATG;rbs\_motif=AATAA;rbs\_spacer=3bp;  
 gc\_cont=0.379  
 MNSIDNKTNFSFRSISLTKTKIITWTAIFIMFMMPTSAYAADMALPDDFVGISFCLSSMALMASTVFYLWETQ  
 SVTAKWKTSLVVSALVTFIAAVHYFYMRDVWVATQTSPTVYRYIDWLLTVPLLMIEFYILILRAIGVASAG  
 IFWRLIGTLVMLVPGYLAEAGYMNITIGFVIGMLGWFIYILWEIFKGEAGKAAEANASPAVKYAYNAMRW  
 IVTVGWAIYPIGYVAGYMLSVASPEALNIVYNLADLVNKVAFGLLIWIYAATSESQKDTA  
 >k141\_1231749\_2 # 1093 # 1788 # -1 #  
 ID=1957276\_2;partial=00;start\_type=ATG;rbs\_motif=ATA;rbs\_spacer=8bp;gc  
 \_cont=0.491  
 MTKTKLAKGFTLVELLVVIATIAAALAALSTPVVLKQQKKAASTEAVNNAKQMFILLFEFDQDNGGYPGSS  
 VTNSTGAVSPSSNDAFREFMIASQIDSEEIFYAKTGWSAKPDGDIGVAPTYTTGLAANECGFNYALKAAD  
 ESFGTTSPOSGVPLISTPAVVKAFNGNEFNINAFGGRAVILFNDGACKSLAITEGTTAGQGVVNITVAAAP  
 VELFSVGNTSLAAAPVILPAL  
 >k141\_1790502\_1 # 1 # 639 # 1 #  
 ID=2067556\_1;partial=10;start\_type=Edge;rbs\_motif=None;rbs\_spacer=None  
 ;gc\_cont=0.498  
 AIIAALAALSTPVVLKQQKKAASTEAVNNAKQMFILLFEFDQDNGGYPGSSATNSTAAVSASSNDAFREF  
 LIASQIDSEEIFYAKTGWSTKPDGDIGTSPAFTQALEANECGFNYALKGPDDSFSGTTSPOSGVPLISTPAI  
 DKGFTANEFNINAFGGRAVILFNDGACKSLAISEGSTAGQGLVNITVGGVDTEIFSVGNTSLSAVPTILP  
 AL  
 >k141\_1448039\_5 # 3256 # 3951 # -1 #  
 ID=956792\_5;partial=00;start\_type=ATG;rbs\_motif=ATA;rbs\_spacer=8bp;gc  
 cont=0.484  
 MTKTKLAKGFTLVELLVVIATIAAALAALSTPVVLKQQKKAASTEAVNNAKQMFILLFEFDQDNGGYPGSS  
 TTNSTGAVSASSNGAFKEFLLASQIDSEEIFYAKTGWSTKPDGDIGTAGTYTTALEANECGFNYALKGAD  
 ESFGTTSPOSGVPLISTPAIVKAFTGNEFNINAFGGRAVILFNDGACKSLAITEGSTAGQIVNITVAGAP  
 VEIFSIGNTSLSAAPSILPAL  
 >k141\_1494370\_1 # 2 # 427 # -1 #  
 ID=1721532\_1;partial=11;start\_type=Edge;rbs\_motif=None;rbs\_spacer=None  
 ;gc\_cont=0.498  
 ELLVVIATIAAALAALSTPVVLKQQKKAASTEAVNNAKQMFILLFEFDQDNGGYPGSSATNSTAAVSASSN  
 GAFKEFLLASQIDSEEIFYAKTGWSTKPDGDIGLAGSYTTALESNECGFNIALKGADESFGTTSPOSGVPL  
 IS

>k141\_2715013\_13 # 8525 # 8728 # 1 #  
ID=1257753\_13;partial=00;start\_type=ATG;rbs\_motif=AACAA;rbs\_spacer=9bp  
;gc\_cont=0.554  
MAQTNITEIRELTTEELISRLRDLKQESLNLRLQQATGQLENTAR~~RL~~KLVRREVARVQTTLSERRLQS  
>k141\_1532868\_14 # 18027 # 20369 # 1 #  
ID=34121\_14;partial=00;start\_type=ATG;rbs\_motif=None;rbs\_spacer=None;g  
c\_cont=0.357  
MKKLFFSVCFSEFVAVAAFAQDEEQEKEIVTTDLEEVIVMSGIIDLAKDRKTPIAVSNITTSEIERKGGSF  
DLIEVMRSTPSVQINRGSGFGDGQMYLRGFDQTNTAFLINGQPINGVEDGKMYWSNWSGMIDVAEEIEIQ  
RGLGSSKLAISSVGGTVNIVTKTVDAKEGGVYKSMIGNDNYFKNSLYLSSGLNDNGWAYAMFLGHWSGDG  
YMQFSKGQGQTYFFSVGYKPNDSNVFNAFITGAPQWHGSGGGENLQKYLDEGFDYADWGGVVRNGEIYPGG  
RNFYHKPIYNLSWDWTINDNSSLSTVLYGSHGRGGFAYNEGKFYYTDQGMTDYDKIIAENAAGNSEGIVK  
ASVNGHNWYGAVSNYSSQINENLSFNLGFDLFRFYNGIHFRTPTDYLGSLSSYKGATKSYGYNPWDVAFDFP  
KGSRDDYHISYDYEEDITYSGLFGQLEYSNENSSYYFQGAVSSQSHLKEDFMFDLGKAE EVTNTGYNLKV  
GGSTSVGDYSKVYANFGFYSRQPFHDDLNIYRYSNNLNIGGAENQEITGIELGYVYEKDSFKAIIDLYS  
TTWDNRILSSTEYDDDNVILSYSQSDPISQVHKGIEGQFFYKPSMDIMLKAYFSLGDWTYNSNVKSTTFN  
EAGQTLSEGDVAYLDSVKVGDAQTGGIEMMYIVNDRSRVDLSLNHYADLYARVNFSDDIFENAGNSGT  
IKLPSHTLVDLSTMDIPLKDNNEARLGIFNLFDTKYIEEMTRNPNVTGDSTVWRGIDTSNRVDPGYLR  
TWTLGFKYKF

---

>k141\_2064207\_6 # 3741 # 7004 # 1 #  
ID=2072740\_6;partial=00;start\_type=ATG;rbs\_motif=AAAAAA;rbs\_spacer=12b  
p;gc\_cont=0.358  
MLISHKSSIFVEILLIIIFIHMKLLLLSSAMMLFAFTAMAQKTVTGVLVDASGVPLPGASVVEQGTSNG  
VSTDFDGNYSIEVAEGSILEISFIGYQTFESTIGESDSLNVSLLEEDNQLEEVVITALGVKRESRSIGYSI  
KTVTGDNLQKTEGDIGRVLQGGVAGVNITNSTGISGSGTNIVIRGYTSITGSNQPLFIVDGVFPDSSTN  
SQEAFFDGNNTASSRFLDLDPNISIESINVLKGLSATTLYGQQGRNGVILVTTKSGSRKISAKGFETTQS  
YFQSTPNLPDYQTDYGGGFHQEFQFYFSNGGPNFDARISQPSQFGAFYRETLGNTVYVQHPISKINDASL  
VSDPDIAALANQNYAYKNYDSVKNFFRTGIVHTTSVNMKKTTESGFMNLSFGR~~TSDEGFTPGNK~~LGRNTNI  
SIGGSEKLENGITFGGTMNFAQTNYKTPPVSAGTSGSVVSGSGASIFGHVMFTPKSVDLMLNLPYQTS  
DGRS  
IYYRSGNDIQNPRWTVDNSKVSQFVNRVYGNVNLSYEIIDDLNVSYVYGFDVYTEQNTNGQNKGGVDGDV  
TGSYQTIDVVNQVYDHNVKLSYSKAINDKIGFQGIIGATGRNRVYSQNQVNSTQQLAFGVMKHFNFVNQA  
GSSFDSEQNIYGVFADFTFDYNNYLFNLQGRNDQASNLEKENNSLFYPGGSIAFVATDAFPQIKSDLLS  
YAKFRIGYGNSAGFGSTYRTRSTLGLSSRDFLDRGGNVIPSNFVSNTLGNSELKPEKVSEFEIGLDMRLL  
NNKLGLNISLFDNRNTQNLITSRTLPAASGYTNMTINAGKVSQGVQLDFNRYRPIKTADFQWQIDGNFYAD  
ESLVEELQGSTTEFTYTNIIISGRPQNFAIVGQPLGVIKATTIERNASGEPLIDADGFYVESTEQSI  
VGDP  
NPDWVSNLSNTFSYKDFSLGFTLQYRHGGDLFSQTAATLVGRGVLPNTNREGVYVLDGVNESDGA  
VNTT  
QITAINYGFDVFSFGPSEIQIFDGTITRLSEVNLNYNVPKSFLEKTAIGSLNIRLTGSNLFYRAVNMPEV  
VNFDTNMMSTGVGNAQGGIFITGPSARRVGITVKATF  
>k141\_2534115\_4 # 3127 # 4092 # 1 #  
ID=534328\_4;partial=00;start\_type=ATG;rbs\_motif=GGAG/GAGG;rbs\_spacer=5  
-10bp;gc\_cont=0.555  
MFKQLKIGGAVLIGVMTAASITVAQEFISIGTGGVTGVYYPTGGAICRLVNKSRKEHGIRCAVESTGGSV  
YNINTIKAGELEFGVAQSDWQHAYNGTSKFADNPFDPDLRAVMSVHPEPFTLIVRGDSGIDSFEALKGKR  
VNVGNPGSGQRATMEVVMDAFGIGMDDLALATEYKSGSEMAKQLCDDNIDAMIYTIHPAAAIKEATTTCD  
AKLVSVTGAPIDKLVDNPFYRVATIPGGMYKGTGGETTTFGVGATFVTSTSVPEETVYIVAKSVMENIE  
DFKGLHPAFANLDPAQMKDGLSAPLHDGAARAYKELGLIN  
>k141\_2271938\_4 # 2763 # 3728 # 1 #  
ID=868735\_4;partial=00;start\_type=ATG;rbs\_motif=GGAG/GAGG;rbs\_spacer=5  
-10bp;gc\_cont=0.554



MLKQLKLGCVLLAGMMMTASMGAAQEFISIGTGGVTGVYYPTGGAICRLVNRTRKEHGIRCAVESTGGSV  
YNINTIKAGELEFGVAQSDWQHAYNGTSKFADNPFPEIRAVMSVHPEPFTLIVRGDSGIAGFEDLVGKR  
VNVGNPGSGQRATMEVVMDAFGIGMGDFALATEYKGSEMAKQLCDGNIDAMIYTIGHPAAAVKEATTTCD  
ASLVSVTGAPIDQLVADNPFYRVASIPGGMYRGTDTTTTFGVGATFVTSANVPADTVYIVAKSVMENID  
DFRGLHPAFANLDPAQMVSDGLSAPLHDGAARAYRELGLID  
>k141\_2694117\_3 # 1318 # 1932 # 1 #  
ID=893305\_3;partial=01;start\_type=ATG;rbs\_motif=GGAG/GAGG;rbs\_spacer=5  
-10bp;gc\_cont=0.379  
MNFKKLIVGGVVAGFAAMTLAEASAQQFVSIGTGGVTGVYYPTGGAICRLVNKDRKSHGIRCSAESTGGS  
VYNINTVRAGELEFGVAQSDWQYHAYRGTSKFCDKGFCDKLRAVFSVHPEPFTLIVRKDSGITSFEGCLKG  
KKVNVGNPGSGQRATMEVVMESFGMKMSDFSLAAELKGSEMAQAICDGKIEAMIYTVGHPAAAVK  
>k141\_206947\_1 # 162 # 1121 # -1 #  
ID=1202440\_1;partial=00;start\_type=ATG;rbs\_motif=GGAG/GAGG;rbs\_spacer=  
5-10bp;gc\_cont=0.575  
MTIFKSIASALVAGTAATAQEKFITIGTGGQTVGVYFVVGQSIICRLVNRDTAKTGLKCTAPSTRGTIAN  
INAMQAGDMDMGVAQSDWQFHAYNGSSQFEGDKFDKERAVFSVHAEFPFNVIARADSGIESFDDLKGKRVN  
VGNPGSGQRATMEVVLDAKGWMTMDDFALASELKPAEQAAALGDNKVDAIYTVGHPNGS IQEAVSTVDAK  
LVPVEGEAIDKLVDNPFYAYSTIPGGMYKGTADAVKTFGVKATFVTSADVDEEVVYEVVKAVFDNFDRF  
KKLHPAFENLKEEEMIKDGLSAPLHDGAAKYKERGWI  
>k141\_1605246\_2 # 895 # 1503 # -1 #  
ID=1225383\_2;partial=01;start\_type=Edge;rbs\_motif=None;rbs\_spacer=None  
;gc\_cont=0.525  
FTLLVVRGDSGITSFEELKGKRNVGNPGSGQRATMEVVMDAFGMSMDDFTLATEYKGSEMAKQICDDNID  
AMIYTIGHPAAAIKEATTTCDVQLVSVTGAAVEKLVADNPYYRVATIPAGMYAGNDSDTTTFGVGATFVT  
SANVP EEVAYVVAKAVLSNLDDFRGLHPAFANLDAAQMIKDGLSAPLHDGAAKAYKELGLMD  
>k141\_2436170\_2 # 652 # 1623 # 1 #  
ID=1238338\_2;partial=00;start\_type=ATG;rbs\_motif=GGAG/GAGG;rbs\_spacer=  
5-10bp;gc\_cont=0.400  
MKYTQILGGVFAAASITFGGIIASAADQQFISIGTGGVTGVYYPTGGAICRLVNKTRKEHGIRCAVESTGG  
SVYNINTIKAGELEFGVAQSDWQHAYNGTSKFADNPFPGIRAMFSVHPEPFTLLVRGDSGISSFEGCLKG  
MRNVGNPGSGQRATMEVVMDAFGMKMGDFGLATEYKGSEMAKQICDNNIDAMIYTIGHPAAAIKEATTT  
CDVKLVSVTGAPIDKLVDNPFYRVATIPGGMYSGNADVTTFGVGATFVTSTNVSDDVAYIVAKSVMSN  
LDDFRKLHPAFANLDANQMINDGLSAPHPGAVKAYKELGLMN  
>k141\_634432\_1 # 1 # 624 # 1 #  
ID=1338181\_1;partial=10;start\_type=Edge;rbs\_motif=None;rbs\_spacer=None  
;gc\_cont=0.571  
VHAEPFNVIARADSGIESFDDLKGKRNVGNPGSGQRATMEVVLDAKGWMTMDDFALASELKPAEQAAALG  
DNKVDAIYTVGHPNGS IQEAVSTVDAKLVPVEGEAIDKLVDNPFYAYSTIPGGMYKGTADAVKTFGVK  
ATFVTSADVDEEVVYEVVKAVFDNFDRFKLHPAFENLKEEEMIKDGLSAPLHDGAAKYKERGWI  
>k141\_2580713\_1 # 3 # 347 # -1 #  
ID=1395436\_1;partial=11;start\_type=Edge;rbs\_motif=None;rbs\_spacer=None  
;gc\_cont=0.345  
ESTGGSVYNINTVRAGELEFGVAQSDWQYHAYRGTSKFCDKGFCDKLRAVFSVHPEPFTLIVRKDSGITS  
FEGCLKGKKNVGNPGSGQRATMEVVMESFGMKMSDFSLAAELKGS  
>k141\_1057033\_1 # 1 # 903 # -1 #  
ID=1441180\_1;partial=10;start\_type=ATG;rbs\_motif=GGAG/GAGG;rbs\_spacer=  
5-10bp;gc\_cont=0.579  
MKRTVIGMAAVAGMTIGMASAQEFISIGTGGVTGVYYPTGGAICRLVNKTRKEHGIRCAVESTGGSVYN  
INTIKAGELEFGVAQSDWQFHAYNGTSKFADNPFPEIRAVFSVHPEPFTLLVRGDSGIESFEGIKGKRVN  
VGNPGSGQRATMEVVMDAFGIGMDDLALATEYKGSEMAKELCDGNIDAMIYTIGHPAAAIKEATTTCDVT  
LVDVVGEPIDKLVDNPFYRVASIPGGMYAGNDDTTTTFGVGATFVSASTVSEEAVYIVAKSVMENVDDF  
KQLHPAFANLDPAQMVKDGLS

```
>k141_1347521_1 # 2 # 526 # -1 #
ID=1665981_1;partial=11;start_type=Edge;rbs_motif=None;rbs_spacer=None
;gc_cont=0.570
VIARADSGIESFDDLKGKRVNVGNPGSGQRATMEVVLDAGWTLDDFALASELKPAEQAAALGDNKVDAI
IYTVGHPNGSIQEAVSTVDAKLVPVEGEAIDKLVADNPFYAYSTIPGGMYKGTADVKTFGVKATFVTSA
DVDDEVVYEVVKAVFDNFDRFKKLHPAFENLKEEE
>k141_1522982_2 # 792 # 1763 # -1 #
ID=2222333_2;partial=00;start_type=ATG;rbs_motif=GGAG/GAGG;rbs_spacer=
5-10bp;gc_cont=0.558
MKYSTILGGAVAAAAIAMGGAAAQDQQFISIGTGGVTGVYYPTGGAICRLVNRERKEHGIRCAVESTGG
SVYNINTIKAGELEFGVAQSDWQFHAYNGTSKFADNPFPEVRAMFSVHPEPFTLMVRGDSGITSFEELAG
KRVNVGNPGSGQRATMEVMDAFGMDMNSFALATEYKGSEMAKQICDDNIDAMIYTIGHPAAAIKEATTT
CDVKLVSVTGDAIDGLVADNPYYRVATIPGGMYAGNDADTTTFGVGATFVTSTNVSDDVAYVVAKAVLSN
LDDFRGLHPAFANLDAAQMISDGLSAPLHPGAERAYKELGLMD
```
